# Supplementary material for: Solution-State Studies, X-ray Structure Determination and Luminescence Properties of an Ag(I) Heteroleptic Complex Containing 2,9-Bis(styryl)-1,10-phenanthroline Derivative and Triphenylphosphine
Source: MDPI journal article supplement (doi:10.3390/inorganics11120467), 2023-12-01
Supplement: s1 [file s1]

Archive with 3 entries (3 files):
- checkcif.pdf
- GM50_22_0m.cif
- Supplementary Materials.pdf
