# Supplementary material for: Solution-State Studies, X-ray Structure Determination and Luminescence Properties of an Ag(I) Heteroleptic Complex Containing 2,9-Bis(styryl)-1,10-phenanthroline Derivative and Triphenylphosphine
Source: MDPI journal article supplement (doi:10.3390/inorganics11120467), 2023-12-01
Supplement: s1 [file s1]

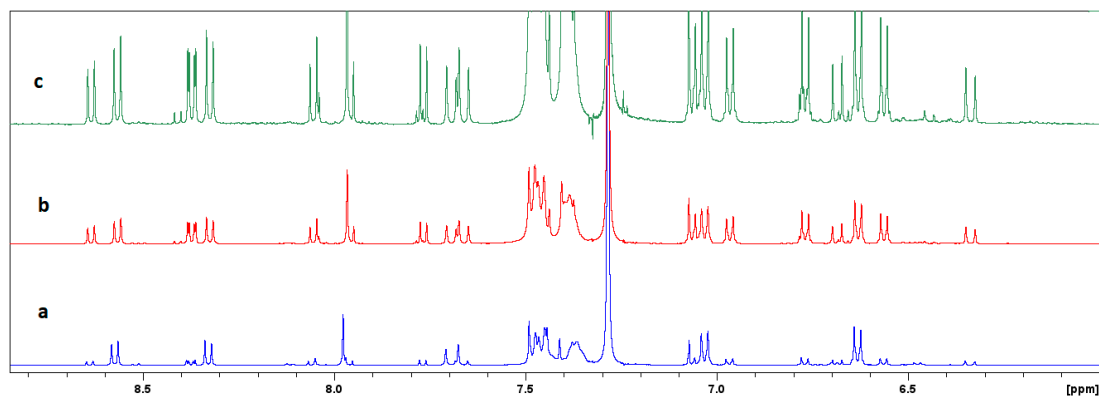

**Figure S1:**  $^1\text{H}$ -NMR spectra (aromatic region) of **1** in  $\text{CDCl}_3$  solutions (500 MHz, 298K): (a) an "aged" sample, (b) irradiated at  $\lambda=365$  nm for 10 min, (c) irradiated for an additional 30 min.

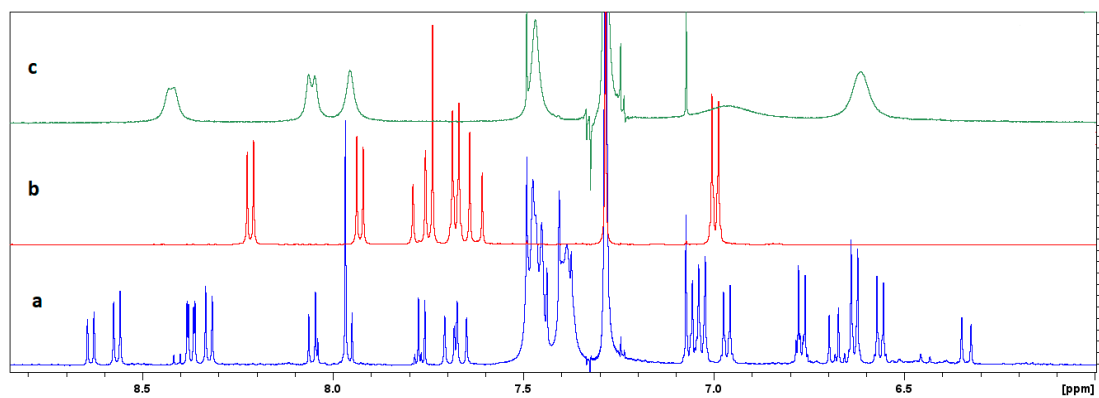

**Figure S2:**  $^1\text{H}$ -NMR spectra (aromatic region) of  $\text{CDCl}_3$  solutions of: (a) **1** irradiated at  $\lambda=365$  nm for 40 min, (b) **L**, (c)  $[\text{AgL}_2]^+$ .

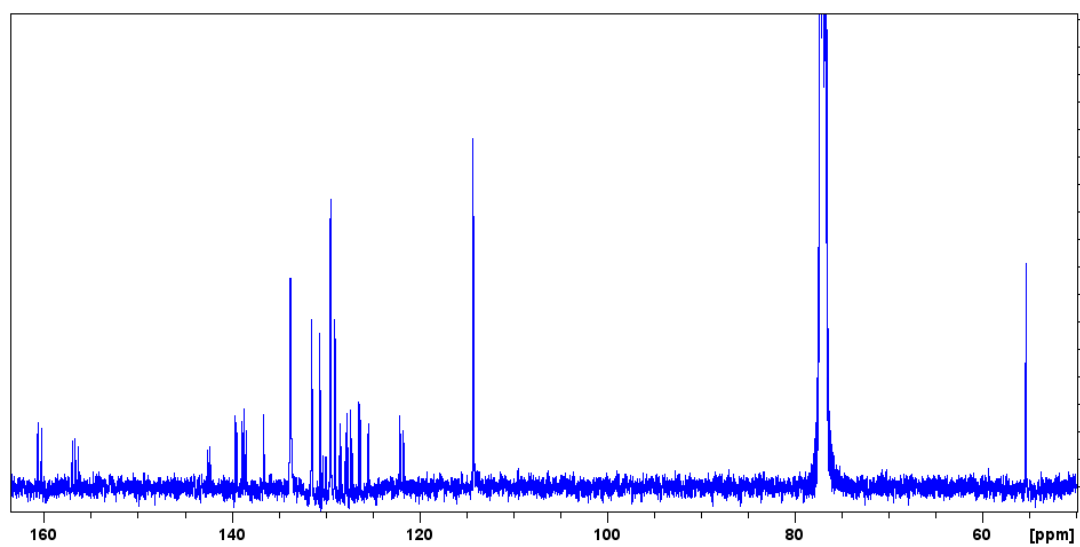

**Figure S3:**  $^{13}\text{C}\{^1\text{H}\}$ -NMR spectrum of a  $\text{CDCl}_3$  solution of **1** irradiated at  $\lambda=365$  nm for 40 min (125 MHz, 298K).

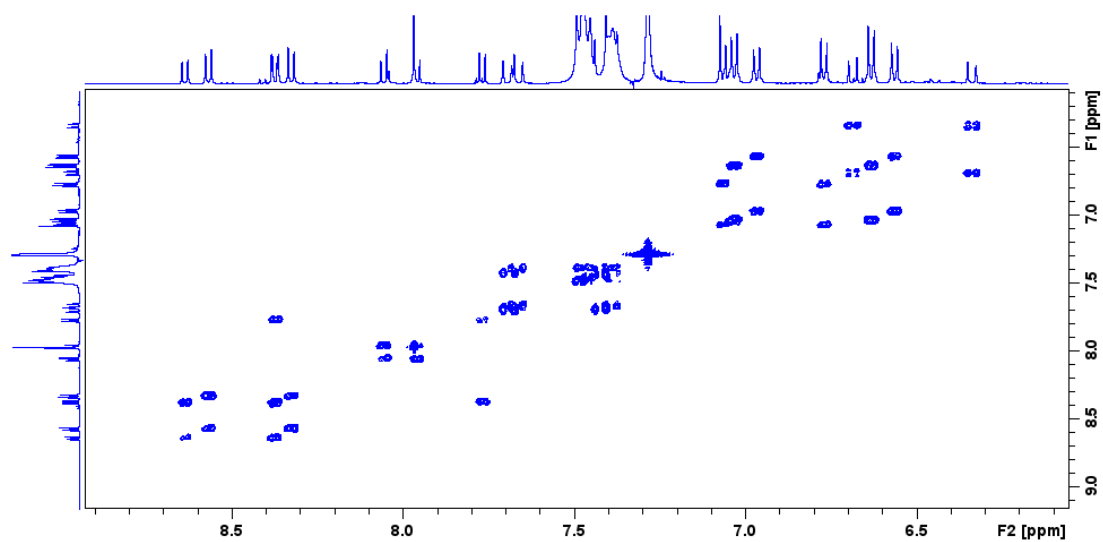

**Figure S4:**  $^1\text{H}$ - $^1\text{H}$ -COSY NMR spectrum (500 MHz, 298K) of a  $\text{CDCl}_3$  solution of **1** irradiated at  $\lambda=365$  nm for 40 min.

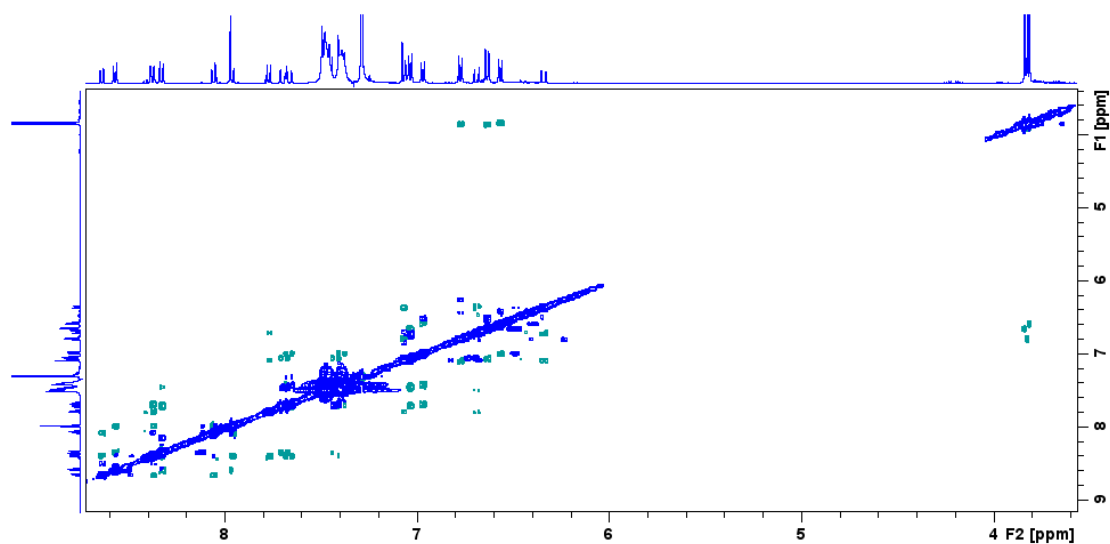

**Figure S5:**  $^1\text{H}$ - $^1\text{H}$ -NOESY NMR spectrum (500 MHz, 298K) of a  $\text{CDCl}_3$  solution of **1** irradiated at  $\lambda=365$  nm for 40 min.

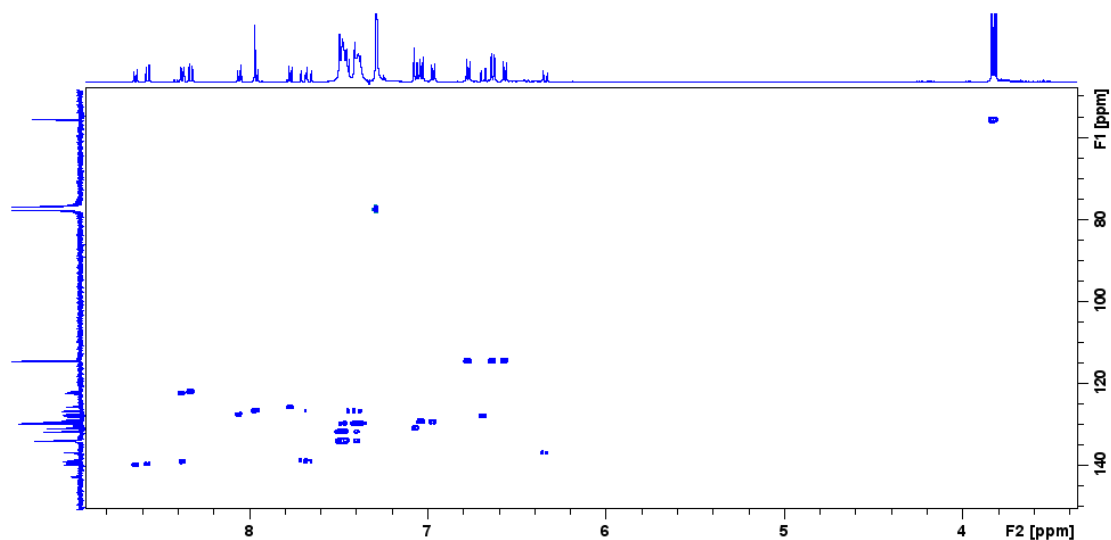

**Figure S6:**  $^1\text{H}$ - $^{13}\text{C}$ -HSQC NMR spectrum (298K) of a  $\text{CDCl}_3$  solution of **1** irradiated at  $\lambda=365$  nm for 40 min.

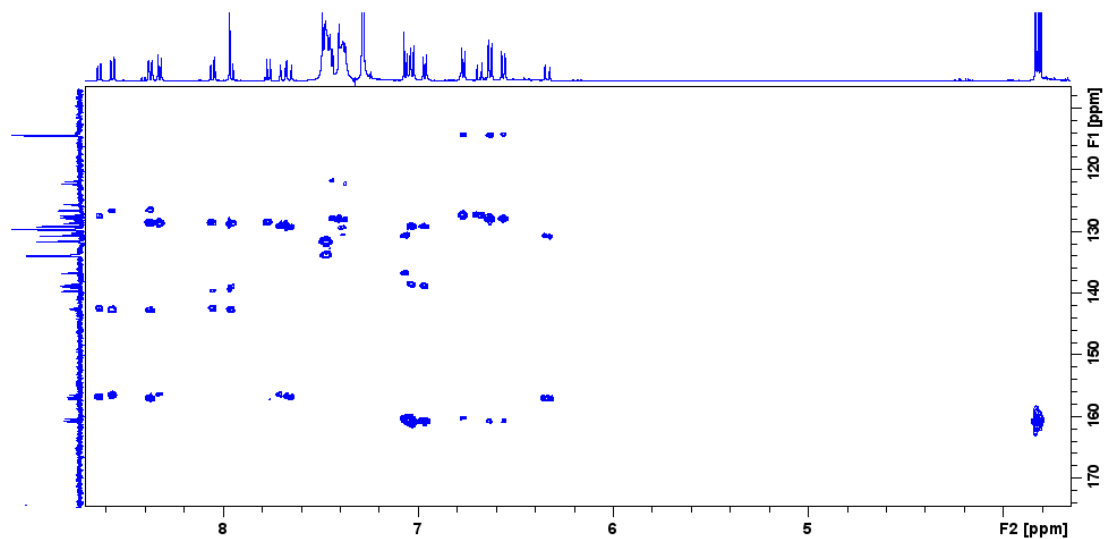

**Figure S7:**  $^1\text{H}$ - $^{13}\text{C}$ -HMBC NMR spectrum (500 MHz, 298K) of a  $\text{CDCl}_3$  solution of **1** irradiated at  $\lambda=365$  nm for 40 min.

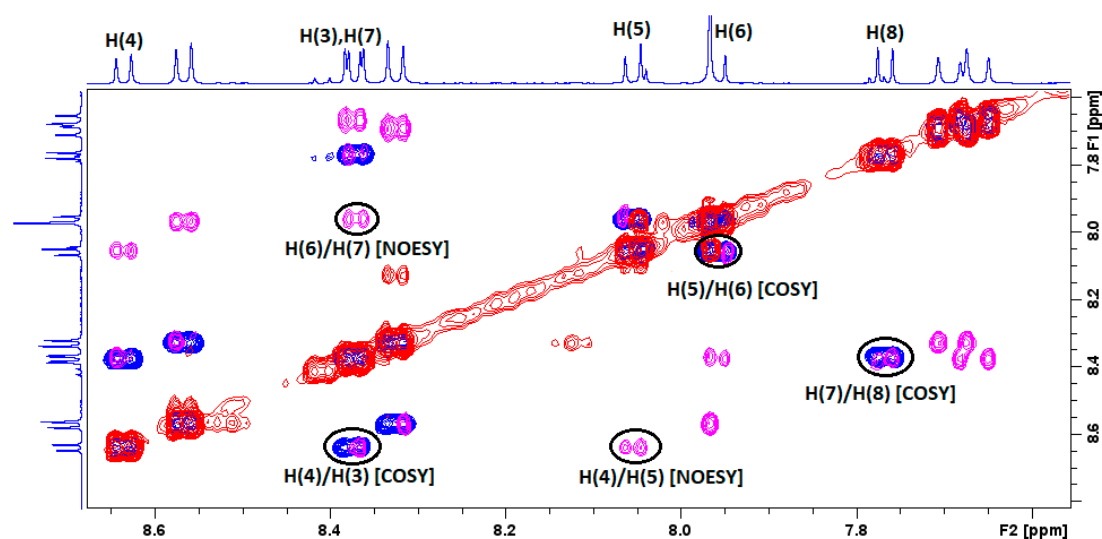

**Figure S8:** Overlay of  $^1\text{H}$ - $^1\text{H}$ -COSY (blue) and  $^1\text{H}$ - $^1\text{H}$ -NOESY (red-magenta) NMR spectra of a  $\text{CDCl}_3$  solution of **1** irradiated at  $\lambda=365$  nm for 40 min. The most informative correlations toward identification of the phen core  $^1\text{H}$ 's are circled.

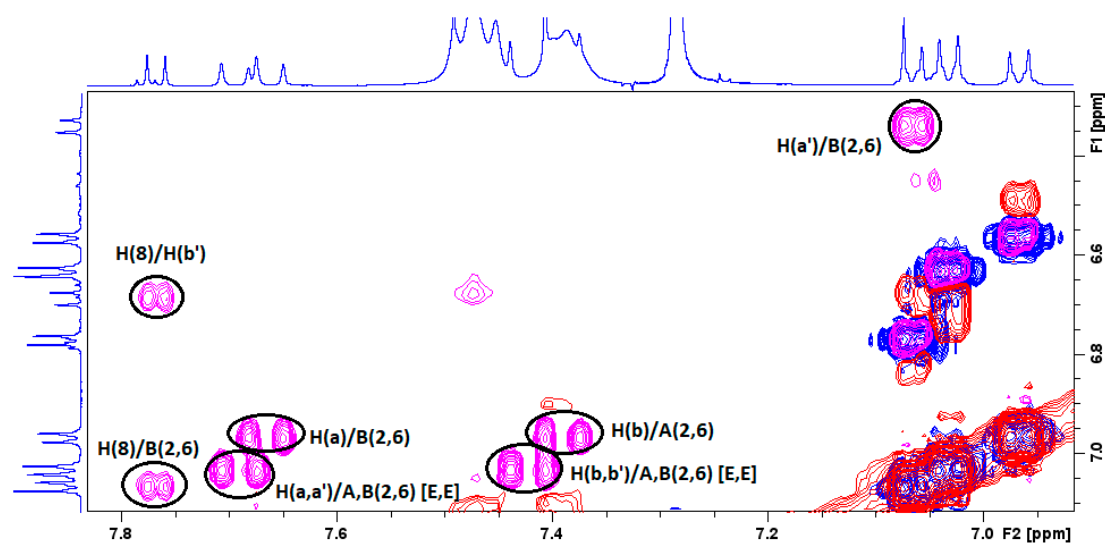

**Figure S9:** Overlay of  $^1\text{H}$ - $^1\text{H}$ -COSY (blue) and  $^1\text{H}$ - $^1\text{H}$ -NOESY (red-magenta) NMR spectra of a  $\text{CDCl}_3$  solution of **1** irradiated at  $\lambda=365$  nm for 40 min, showing the NOE correlations from ethylenic protons.

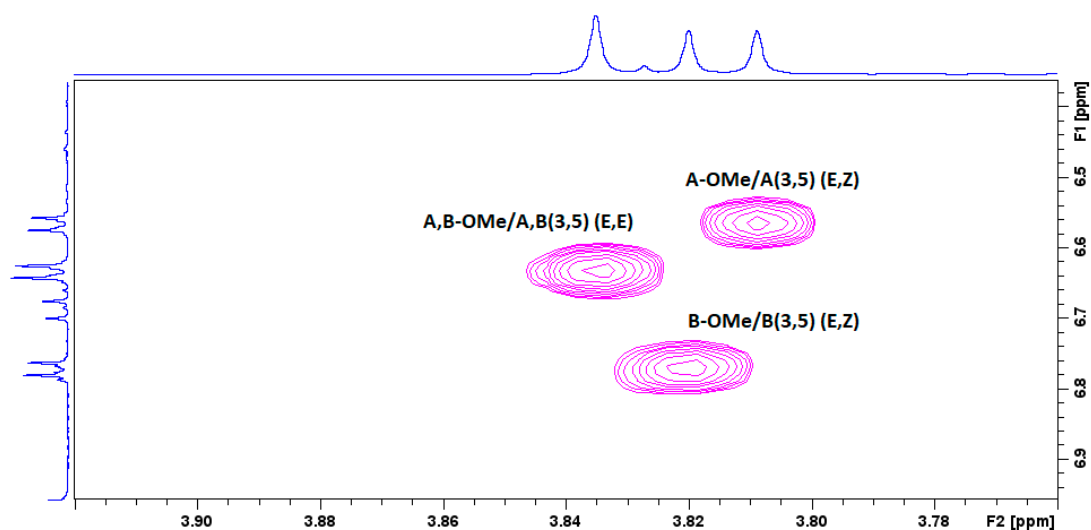

**Figure S10:** Part of  $^1\text{H}$ - $^1\text{H}$ -NOESY spectrum of **1** irradiated at  $\lambda=365$  nm for 40 min, showing the methoxy-A,B(3,5) protons correlations for both isomers. See Scheme 1 for atom labeling.

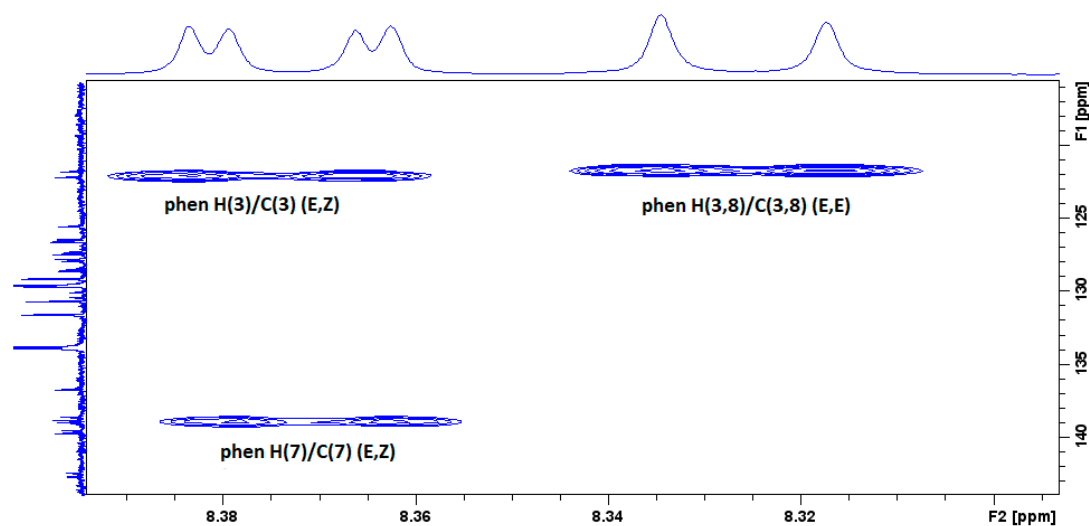

**Figure S11:** Part of  $^1\text{H}$ - $^{13}\text{C}$ -HSQC spectrum of **1** irradiated at  $\lambda=365$  nm for 40 min, showing correlations of H(3)/C(3), H(7)/C(7) for E,Z isomer and H(3,8)/C(3,8) for E,E isomer. See Scheme 1 for atom labeling.

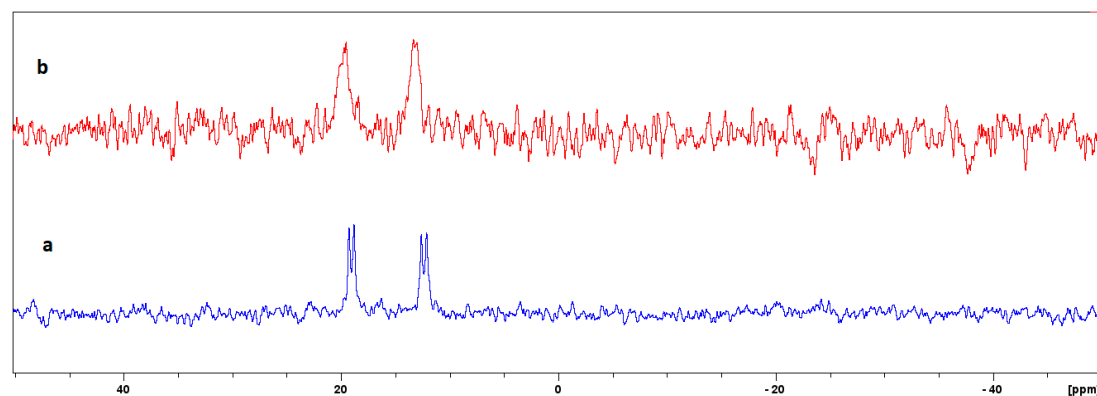

**Figure S12:**  $^{31}\text{P}\{^1\text{H}\}$ -NMR spectra of  $\text{CDCl}_3$  solutions of **1** (101.25 MHz, 298K): (a) using crystals of the compound; (b) irradiated at  $\lambda=365$  nm for 40 min.

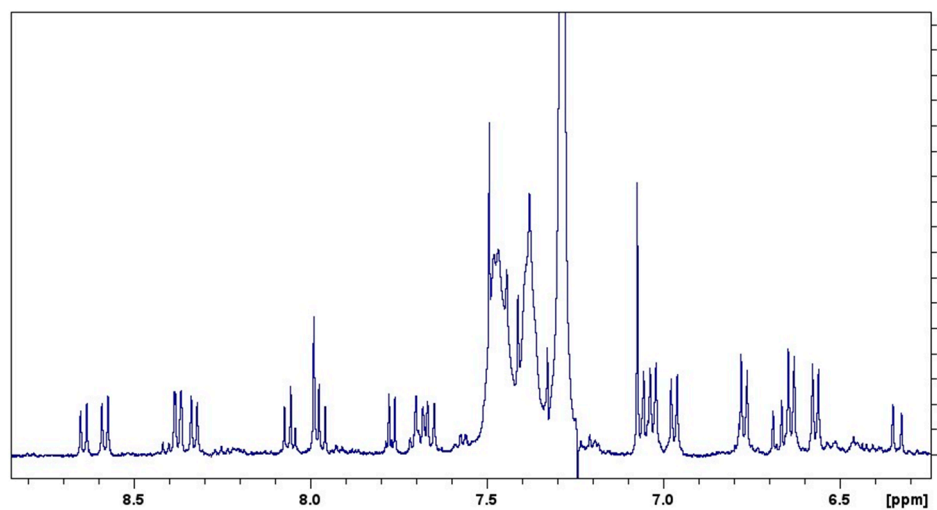

**Figure S13:**  $^1\text{H}$ -NMR spectrum (aromatic region) of a  $\text{CDCl}_3$  solution of compound **1** irradiated at  $\lambda=365$  nm for an additional 2 hours (298K).

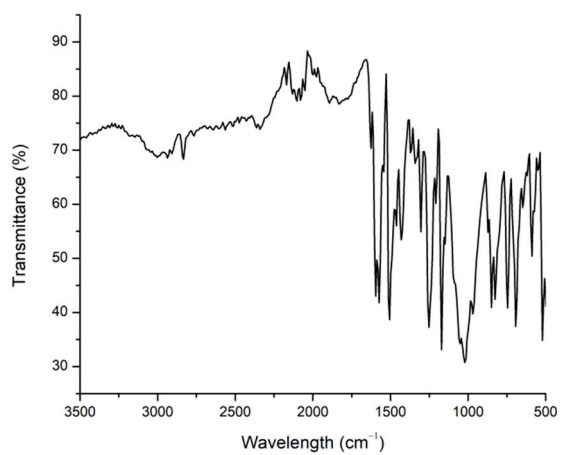

**Figure S14:** The ATR-IR spectrum of **1**.

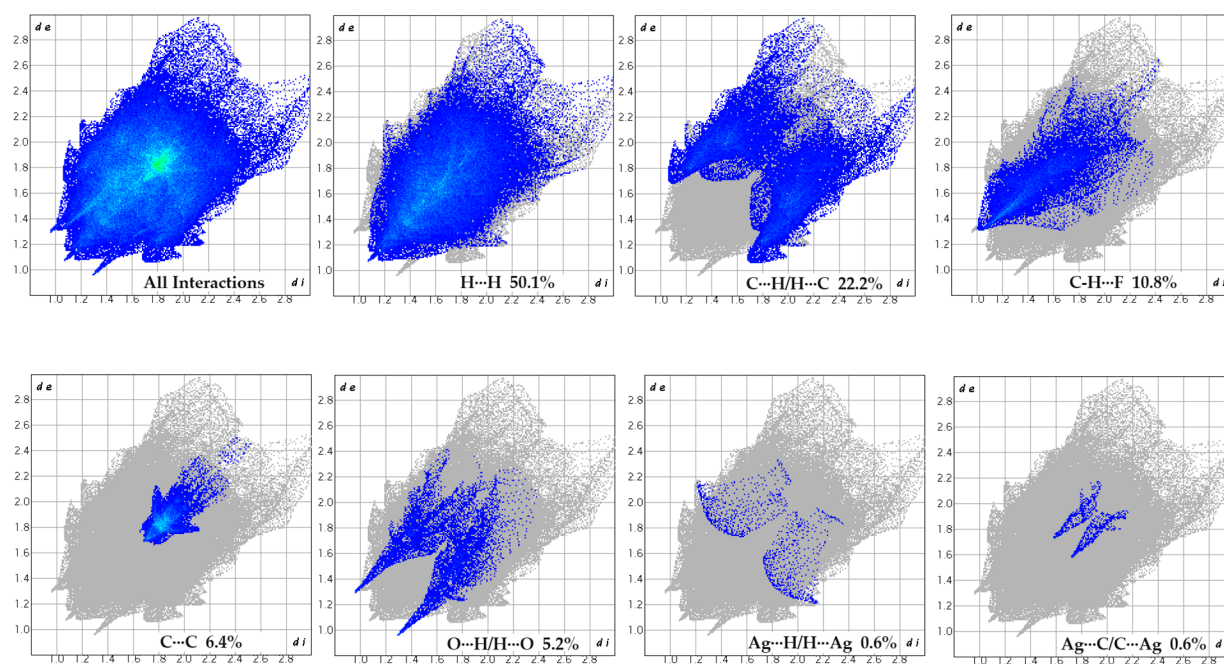

**Figure S15:** 2D fingerprint plots of  $[\text{AgL}(\text{PPh}_3)]\text{BF}_4$ .

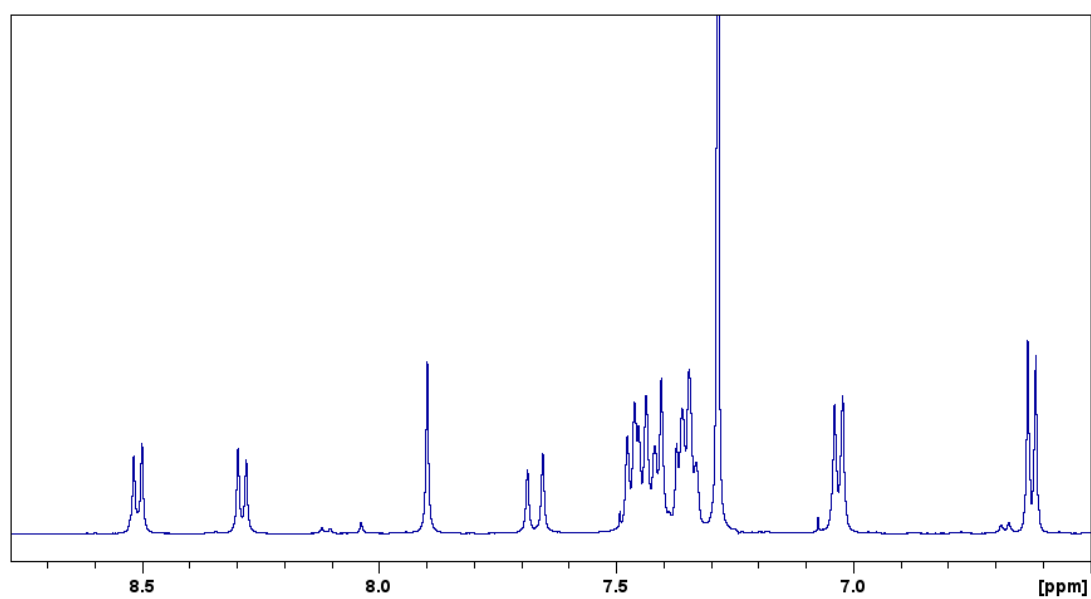

**Figure S16:**  $^1\text{H}$ -NMR spectrum (aromatic region) of a  $\text{CDCl}_3$  solution of **1** acquired immediately after recording the emission spectrum (298K).

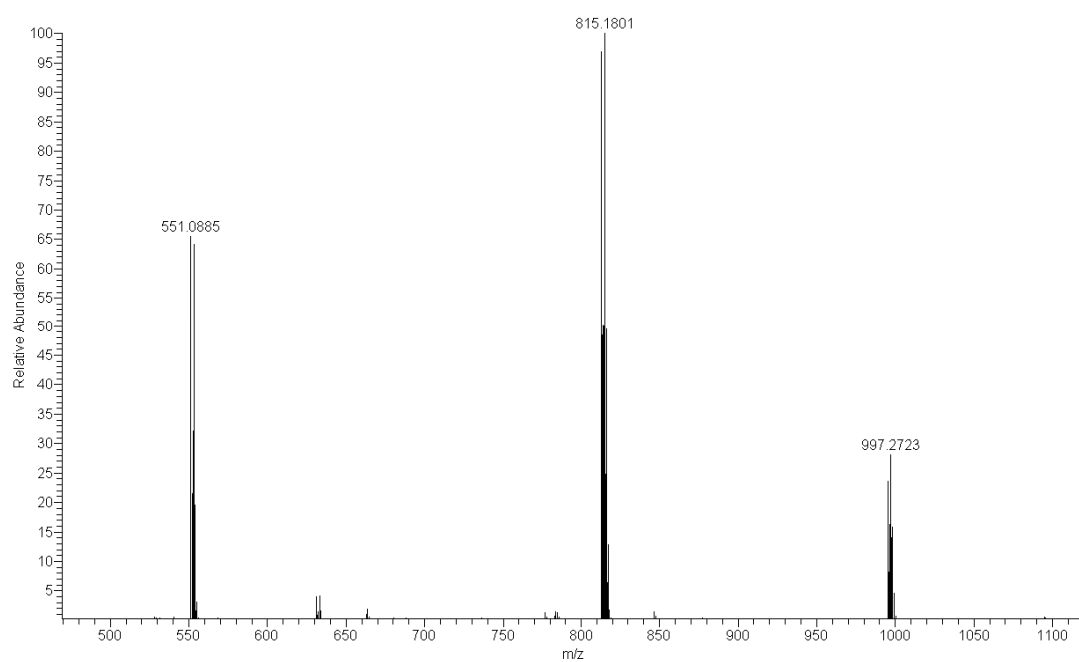

**Figure S17:** HR-ESI-MS spectrum of compound 1 in CHCl<sub>3</sub>.

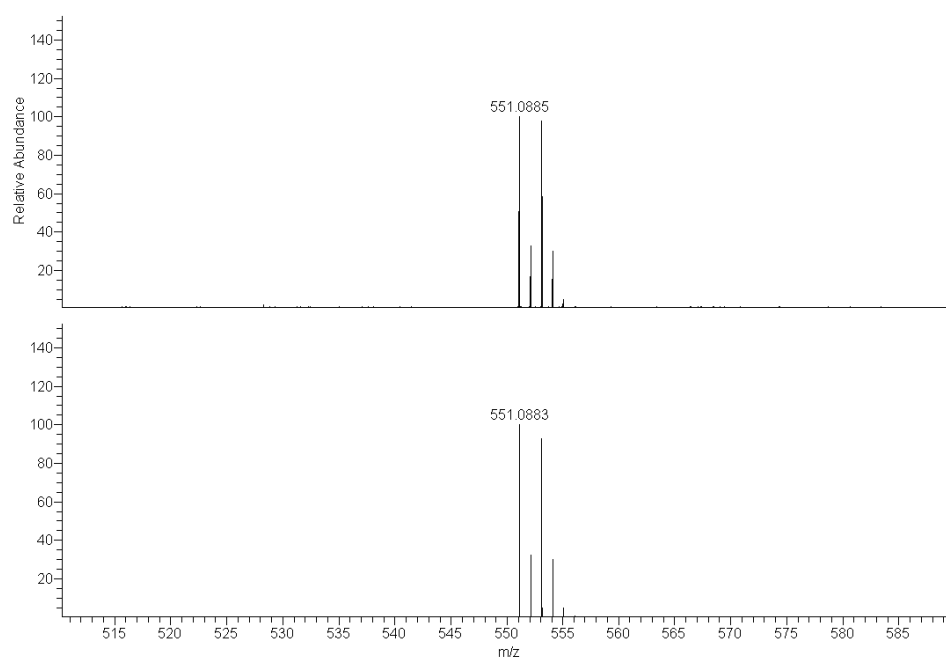

**Figure S18:** HR-ESI-MS spectrum of the fragment [AgL]<sup>+</sup> (top) and theoretical spectrum.



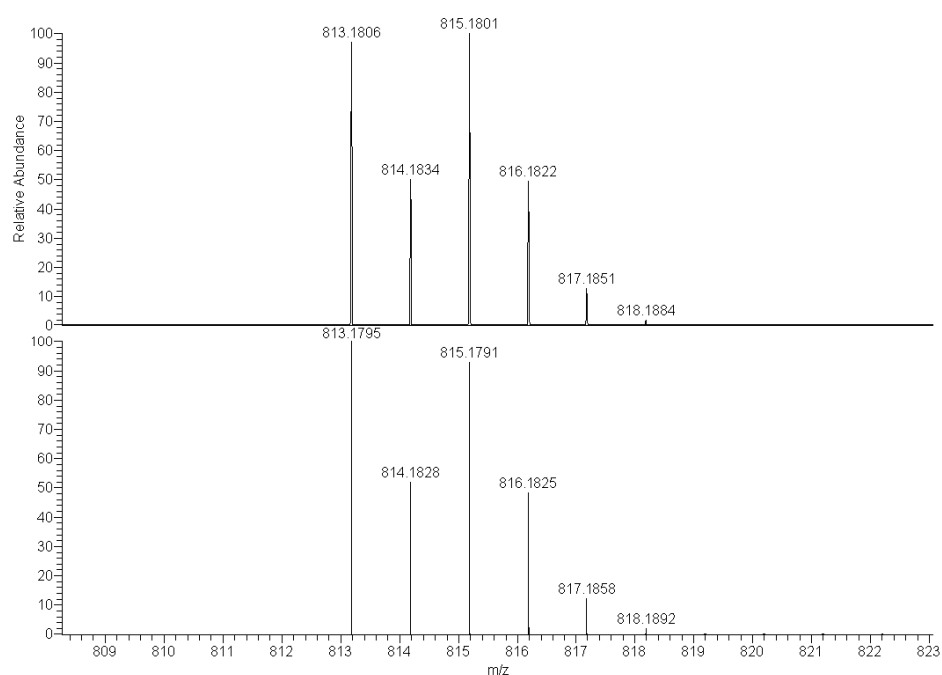

**Figure S19:** HR-ESI-MS spectrum of the fragment  $[\text{AgL}(\text{PPh}_3)]^+$  (top) and theoretical spectrum.

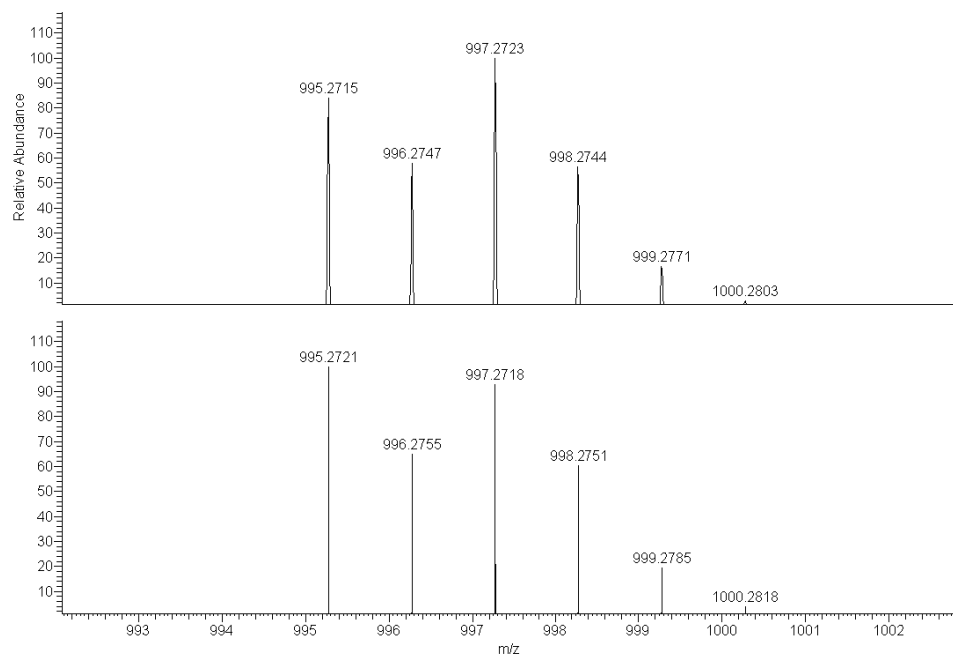

**Figure S20:** HR-ESI-MS spectrum of the fragment  $[\text{AgL}_2]^+$  (top) and theoretical spectrum.

**Table S1:** <sup>13</sup>C-NMR data ( $\delta$ , ppm) for L/PPh<sub>3</sub>, and complex (E,E and E, Z isomers)

| C Atoms                             | L(E,E) | Complex(E,E) | $\Delta\delta(E,E)^*$ | C Atoms                             | Complex(E,Z) | $\Delta\delta(E,Z)^*$ |
|-------------------------------------|--------|--------------|-----------------------|-------------------------------------|--------------|-----------------------|
| C(3,8) phen                         | 120.1  | 121.7        | 1.6                   | C(3) phen                           | 122.1        | 2                     |
| C(4,7) phen                         | 136.4  | 139.4        | 3                     | C(4) phen                           | 139.6        | 3.2                   |
| C(5,6) phen                         | 125.7  | 126.4        | 0.7                   | C(5) phen                           | 127.3        | 1.6                   |
| C(2,9) phen                         | 156.7  | 156.4        | -0.3                  | C(6) phen                           | 126.3        | 0.6                   |
| C(4a,4b) phen                       | 127.8  | 126.5        | -1.3                  | C(7) phen                           | 138.9        | 2.5                   |
| C(10a,10b) phen                     | 145.9  | 142.6        | -3.3                  | C(8) phen                           | 125.5        | 5.4                   |
| C(a,a')                             | 133.7  | 138.5        | 4.8                   | C(a) (E)                            | 138.7        | 5                     |
| C(b,b')                             | 128    | 126.5        | -1.5                  | C(b) (E)                            | 126.4        | -1.6                  |
| A,B C(2,6/2',6')                    | 128.7  | 129          | 0.3                   | C(a') (Z)                           | 136.6        | 2.9                   |
| A,B C(3,5/3',5')                    | 114.5  | 114.3        | -0.2                  | C(b') (Z)                           | 127.7        | -0.3                  |
| A,B C1                              | 129.6  | 127.9        | -1.7                  | A C(2,6)                            | 129.1        | 0.4                   |
| A,B C4                              | 160    | 160.7        | -0.7                  | A C(3,5)                            | 114.2        | -0.3                  |
| A,B C(-OMe)                         | 55.4   | 55.4         | 0                     | B C(2,6)                            | 130.6        | 1.9                   |
| C <sub>ipso</sub> PPh <sub>3</sub>  | -      | 130.4        | -                     | B C(3,5)                            | 114.3        | -0.2                  |
| C <sub>ortho</sub> PPh <sub>3</sub> | -      | 133.8        | -                     | A C(-OMe)                           | 55.3         | -0.1                  |
| C <sub>meta</sub> PPh <sub>3</sub>  | -      | 129.5        | -                     | B C(-OMe)                           | 55.4         | 0                     |
| C <sub>para</sub> PPh <sub>3</sub>  | -      | 131.5        | -                     | C(2) phen                           | 156.7        | 0                     |
|                                     |        |              |                       | C(9) phen                           | 157          | 0.3                   |
|                                     |        |              |                       | C(4a) phen                          | 128.5        | 0.7                   |
|                                     |        |              |                       | C(4b) phen                          | 128.4        | 0.6                   |
|                                     |        |              |                       | C(10a) phen                         | 142.6        | -3.3                  |
|                                     |        |              |                       | C(10b) phen                         | 142.3        | -3.6                  |
|                                     |        |              |                       | A C(1)                              | 127.8        | -1.8                  |
|                                     |        |              |                       | A C(4)                              | 160.7        | 0.7                   |
|                                     |        |              |                       | B C(1)                              | 127.2        | -2.4                  |
|                                     |        |              |                       | B C(4)                              | 160.2        | 0.2                   |
|                                     |        |              |                       | C <sub>ipso</sub> PPh <sub>3</sub>  | 130.4        | -                     |
|                                     |        |              |                       | C <sub>ortho</sub> PPh <sub>3</sub> | 133.8        | -                     |
|                                     |        |              |                       | C <sub>meta</sub> PPh <sub>3</sub>  | 129.5        | -                     |
|                                     |        |              |                       | C <sub>para</sub> PPh <sub>3</sub>  | 131.5        | -                     |

\* $\Delta\delta = \delta_{\text{complex (E,E or E,Z)}} - \delta_{\text{ligand}}$  (ppm)

**Table S2:** Crystal data and structure refinement for C<sub>48</sub> H<sub>39</sub> Ag B F<sub>4</sub> N<sub>2</sub> O<sub>2</sub> P at 296(2) K.

|                                |                                                                                                            |
|--------------------------------|------------------------------------------------------------------------------------------------------------|
| Empirical formula              | C <sub>48</sub> H <sub>39</sub> Ag B F <sub>4</sub> N <sub>2</sub> O <sub>2</sub> P                        |
| Formula weight                 | 901.46                                                                                                     |
| Temperature                    | 296(2) K                                                                                                   |
| Wavelength                     | 0.71073 Å                                                                                                  |
| Crystal system                 | Triclinic                                                                                                  |
| Space group                    | P -1                                                                                                       |
| Unit cell dimensions           | a = 10.2795(3) Å, α = 98.070(2)°<br>b = 11.8100(3) Å, β = 103.124(2)°<br>c = 18.7503(4) Å, γ = 106.865(2)° |
| Volume                         | 2068.90(10) Å <sup>3</sup>                                                                                 |
| Z                              | 2                                                                                                          |
| Density (calculated)           | 1.447 g/cm <sup>3</sup>                                                                                    |
| Absorption coefficient         | 0.586 mm <sup>-1</sup>                                                                                     |
| F(000)                         | 920                                                                                                        |
| Crystal size                   | 0.450 × 0.220 × 0.180 mm <sup>3</sup>                                                                      |
| θ range for data collection    | 2.502 to 24.997°                                                                                           |
| Index ranges                   | -12 ≤ h ≤ 12, -14 ≤ k ≤ 14, -22 ≤ l ≤ 22                                                                   |
| Reflections collected          | 68781                                                                                                      |
| Independent reflections        | 7274 [R <sub>int</sub> = 0.0578]                                                                           |
| Completeness to θ = 24.997°    | 99900%                                                                                                     |
| Refinement method              | Full-matrix least-squares on F <sup>2</sup>                                                                |
| Data / restraints / parameters | 7274 / 0 / 534                                                                                             |
| Goodness-of-fit                | 1.052                                                                                                      |
| Final R indices [I > 2σ(I)]    | R <sub>obs</sub> = 0.0324, wR <sub>obs</sub> = 0.0728                                                      |
| R indices [all data]           | R <sub>all</sub> = 0.0485, wR <sub>all</sub> = 0.0790                                                      |
| Extinction coefficient         | .                                                                                                          |
| Largest diff. peak and hole    | 0.531 and -0.321 e·Å <sup>-3</sup>                                                                         |

$$R = \frac{\sum ||F_o| - |F_c||}{\sum |F_o|}, \quad wR = \frac{\{\sum [w(|F_o|^2 - |F_c|^2)^2]\}^{1/2}}{\sum [w(|F_o|^4)]^{1/2}} \quad \text{and}$$
$$w = 1/[\sigma^2(F_o^2) + (0.0314P)^2 + 1.4394P] \quad \text{where } P = (F_o^2 + 2F_c^2)/3$$

**Table S3:** <sup>1</sup>H and <sup>13</sup>C NMR data (δ,ppm) for the ligand

| H Atoms          | δ (ppm) | C Atoms          | δ (ppm) |
|------------------|---------|------------------|---------|
| H(3,8)           | 7.93    | C(3,8)           | 120.1   |
| H(4,7)           | 8.22    | C(4,7)           | 136.4   |
| H(5,6)           | 7.74    | C(5,6)           | 125.7   |
| -                | -       | C(2,9 phen)      | 156.7   |
| -                | -       | C(4a,4b phen)    | 127.8   |
| -                | -       | C(10a,10b phen)  | 145.9   |
| H(a,a')          | 7.77    | C(a,a')          | 133.7   |
| H(b,b')          | 7.62    | C(b,b')          | 128     |
| A,B H(2,6/2',6') | 7.68    | A,B C(2,6/2',6') | 128.7   |
| A,B H(3,5/3',5') | 6.99    | A,B C(3,5/3',5') | 114.5   |
| -                | -       | A,B C(1)         | 129.6   |
| -                | -       | A,B C(4)         | 160     |
| A,B H(-OMe)      | 3.9     | A,B C(-OMe)      | 55.4    |
