# Supplementary material for: Solution-State Studies, X-ray Structure Determination and Luminescence Properties of an Ag(I) Heteroleptic Complex Containing 2,9-Bis(styryl)-1,10-phenanthroline Derivative and Triphenylphosphine
Source: MDPI journal article supplement (doi:10.3390/inorganics11120467), 2023-12-01
Supplement: s1 [file s1 › GM50_22_0m.cif]

 
data_GM50_22_0m_CIF
 
_audit_creation_method            'SHELXL-2018/3'
_shelx_SHELXL_version_number      '2018/3'
_chemical_name_systematic         ?
_chemical_name_common             ?
_chemical_melting_point           ?
_chemical_formula_moiety          ?
_chemical_formula_sum
 'C48 H39 Ag B F4 N2 O2 P' 
_chemical_formula_weight          901.46

loop_
 _atom_type_symbol
 _atom_type_description
 _atom_type_scat_dispersion_real
 _atom_type_scat_dispersion_imag
 _atom_type_scat_source
 'C'  'C'   0.0033   0.0016
 'International Tables Vol C Tables 4.2.6.8 and 6.1.1.4'
 'H'  'H'   0.0000   0.0000
 'International Tables Vol C Tables 4.2.6.8 and 6.1.1.4'
 'O'  'O'   0.0106   0.0060
 'International Tables Vol C Tables 4.2.6.8 and 6.1.1.4'
 'B'  'B'   0.0013   0.0007
 'International Tables Vol C Tables 4.2.6.8 and 6.1.1.4'
 'F'  'F'   0.0171   0.0103
 'International Tables Vol C Tables 4.2.6.8 and 6.1.1.4'
 'P'  'P'   0.1023   0.0942
 'International Tables Vol C Tables 4.2.6.8 and 6.1.1.4'
 'Ag'  'Ag'  -0.8971   1.1015
 'International Tables Vol C Tables 4.2.6.8 and 6.1.1.4'
 'N'  'N'   0.0061   0.0033
 'International Tables Vol C Tables 4.2.6.8 and 6.1.1.4'
 
_space_group_crystal_system       triclinic
_space_group_IT_number            2
_space_group_name_H-M_alt         'P -1'
_space_group_name_Hall            '-P 1'
 
_shelx_space_group_comment
;
The symmetry employed for this shelxl refinement is uniquely defined
by the following loop, which should always be used as a source of
symmetry information in preference to the above space-group names.
They are only intended as comments.
;
 
loop_
 _space_group_symop_operation_xyz
 'x, y, z'
 '-x, -y, -z'
 
_cell_length_a                    10.2795(3)
_cell_length_b                    11.8100(3)
_cell_length_c                    18.7503(4)
_cell_angle_alpha                 98.070(2)
_cell_angle_beta                  103.124(2)
_cell_angle_gamma                 106.865(2)
_cell_volume                      2068.90(10)
_cell_formula_units_Z             2
_cell_measurement_temperature     296(2)
_cell_measurement_reflns_used     9631
_cell_measurement_theta_min       2.50
_cell_measurement_theta_max       27.54
 
_exptl_crystal_description        'prism'
_exptl_crystal_colour             'yellow'
_exptl_crystal_density_meas       ?
_exptl_crystal_density_method     ?
_exptl_crystal_density_diffrn     1.447          
_exptl_crystal_F_000              920
_exptl_transmission_factor_min    ?
_exptl_transmission_factor_max    ?
_exptl_crystal_size_max           0.450
_exptl_crystal_size_mid           0.220
_exptl_crystal_size_min           0.180
_exptl_absorpt_coefficient_mu     0.586
_shelx_estimated_absorpt_T_min    0.778
_shelx_estimated_absorpt_T_max    0.902
_exptl_absorpt_correction_type    Multi-Scan
_exptl_absorpt_correction_T_min   0.6208
_exptl_absorpt_correction_T_max   0.7456
_exptl_absorpt_process_details    
;
SADABS-2016/2 - Bruker AXS area detector scaling and absorption correction
;
_exptl_absorpt_special_details    ?
_diffrn_ambient_temperature       296(2)
_diffrn_radiation_wavelength      0.71073
_diffrn_radiation_type            MoK\a
_diffrn_source                    'sealed tube'
_diffrn_measurement_device_type   'Bruker D8 Eco with PHOTON II detector'
_diffrn_measurement_method        '\f and \w scans'
_diffrn_detector_area_resol_mean  7.3910
_diffrn_reflns_number             68781
_diffrn_reflns_av_unetI/netI      0.0256
_diffrn_reflns_av_R_equivalents   0.0578
_diffrn_reflns_limit_h_min        -12
_diffrn_reflns_limit_h_max        12
_diffrn_reflns_limit_k_min        -14
_diffrn_reflns_limit_k_max        14
_diffrn_reflns_limit_l_min        -22
_diffrn_reflns_limit_l_max        22
_diffrn_reflns_theta_min          2.502
_diffrn_reflns_theta_max          24.997
_diffrn_reflns_theta_full         24.997
_diffrn_measured_fraction_theta_max   0.999
_diffrn_measured_fraction_theta_full  0.999
_diffrn_reflns_Laue_measured_fraction_max    0.999
_diffrn_reflns_Laue_measured_fraction_full   0.999
_diffrn_reflns_point_group_measured_fraction_max   0.999
_diffrn_reflns_point_group_measured_fraction_full  0.999
_reflns_number_total              7274
_reflns_number_gt                 5969
_reflns_threshold_expression      'I > 2\s(I)'
_reflns_Friedel_coverage          0.000
_reflns_Friedel_fraction_max      .
_reflns_Friedel_fraction_full     .
 
_reflns_special_details
;
 Reflections were merged by SHELXL according to the crystal
 class for the calculation of statistics and refinement.
 
 _reflns_Friedel_fraction is defined as the number of unique
 Friedel pairs measured divided by the number that would be
 possible theoretically, ignoring centric projections and
 systematic absences.
;
 
_computing_data_collection        ?
_computing_cell_refinement        ?
_computing_data_reduction         ?
_computing_structure_solution     'SHELXT 2014/5 (Sheldrick, 2014)'
_computing_structure_refinement 'SHELXL-2018/3 (Sheldrick, 2018)'
_computing_molecular_graphics     ?
_computing_publication_material   ?
_refine_special_details           ?
_refine_ls_structure_factor_coef  Fsqd
_refine_ls_matrix_type            full
_refine_ls_weighting_scheme       calc
_refine_ls_weighting_details
'w=1/[\s^2^(Fo^2^)+(0.0314P)^2^+1.4394P] where P=(Fo^2^+2Fc^2^)/3'
_atom_sites_solution_primary      ?
_atom_sites_solution_secondary    ?
_atom_sites_solution_hydrogens    geom
_refine_ls_hydrogen_treatment     constr
_refine_ls_extinction_method      none
_refine_ls_extinction_coef        .
_refine_ls_number_reflns          7274
_refine_ls_number_parameters      534
_refine_ls_number_restraints      0
_refine_ls_R_factor_all           0.0485
_refine_ls_R_factor_gt            0.0324
_refine_ls_wR_factor_ref          0.0790
_refine_ls_wR_factor_gt           0.0728
_refine_ls_goodness_of_fit_ref    1.052
_refine_ls_restrained_S_all       1.052
_refine_ls_shift/su_max           0.000
_refine_ls_shift/su_mean          0.000
 
loop_
 _atom_site_label
 _atom_site_type_symbol
 _atom_site_fract_x
 _atom_site_fract_y
 _atom_site_fract_z
 _atom_site_U_iso_or_equiv
 _atom_site_adp_type
 _atom_site_occupancy
 _atom_site_site_symmetry_order  
 _atom_site_calc_flag
 _atom_site_refinement_flags_posn
 _atom_site_refinement_flags_adp
 _atom_site_refinement_flags_occupancy
 _atom_site_disorder_assembly
 _atom_site_disorder_group
Ag1 Ag 0.47462(2) 0.57810(2) 0.18239(2) 0.04486(8) Uani 1 1 d . . . . .
B1 B 0.2123(5) 0.7786(4) 0.1984(2) 0.0638(10) Uani 1 1 d . . . . .
C1 C 0.2262(3) 0.4781(2) 0.02376(15) 0.0427(6) Uani 1 1 d . . . . .
N1 N 0.3574(2) 0.55305(18) 0.05892(11) 0.0363(5) Uani 1 1 d . . . . .
P1 P 0.50487(8) 0.51029(6) 0.29647(4) 0.03956(16) Uani 1 1 d . . . . .
F1 F 0.2741(3) 0.8668(2) 0.26175(12) 0.0972(7) Uani 1 1 d . . . . .
O1 O -0.3736(3) 0.1027(3) 0.18447(14) 0.0867(8) Uani 1 1 d . . . . .
F3 F 0.1181(4) 0.6853(3) 0.2127(2) 0.1568(14) Uani 1 1 d . . . . .
C3 C 0.2487(3) 0.5210(3) -0.09489(16) 0.0545(8) Uani 1 1 d . . . . .
H3 H 0.211741 0.508900 -0.146536 0.065 Uiso 1 1 calc R U . . .
N2 N 0.6234(2) 0.71683(19) 0.13368(12) 0.0391(5) Uani 1 1 d . . . . .
F2 F 0.3131(3) 0.7423(3) 0.17789(17) 0.1199(10) Uani 1 1 d . . . . .
O2 O 1.1291(3) 0.8794(2) 0.60394(12) 0.0754(7) Uani 1 1 d . . . . .
C2 C 0.1695(3) 0.4610(3) -0.05510(16) 0.0529(7) Uani 1 1 d . . . . .
H2 H 0.077827 0.408510 -0.079106 0.063 Uiso 1 1 calc R U . . .
C4 C 0.3862(3) 0.6014(3) -0.05922(15) 0.0457(7) Uani 1 1 d . . . . .
F4 F 0.1484(3) 0.8259(3) 0.14438(16) 0.1348(11) Uani 1 1 d . . . . .
C5 C 0.4370(3) 0.6157(2) 0.01903(14) 0.0376(6) Uani 1 1 d . . . . .
C11 C 0.8414(3) 0.8591(3) 0.13214(18) 0.0567(8) Uani 1 1 d . . . . .
H11 H 0.931296 0.912730 0.158624 0.068 Uiso 1 1 calc R U . . .
C10 C 0.7959(4) 0.8426(3) 0.05657(18) 0.0570(8) Uani 1 1 d . . . . .
H10 H 0.854820 0.884719 0.031147 0.068 Uiso 1 1 calc R U . . .
C9 C 0.5764(3) 0.6994(2) 0.05793(14) 0.0391(6) Uani 1 1 d . . . . .
C8 C 0.6609(3) 0.7625(3) 0.01662(16) 0.0461(7) Uani 1 1 d . . . . .
C7 C 0.6054(4) 0.7432(3) -0.06297(17) 0.0551(8) Uani 1 1 d . . . . .
H7 H 0.661375 0.783666 -0.090271 0.066 Uiso 1 1 calc R U . . .
C6 C 0.4742(4) 0.6678(3) -0.09861(16) 0.0541(8) Uani 1 1 d . . . . .
H6 H 0.439576 0.658354 -0.150189 0.065 Uiso 1 1 calc R U . . .
C12 C 0.7519(3) 0.7947(2) 0.17058(15) 0.0439(6) Uani 1 1 d . . . . .
C13 C 0.1422(3) 0.4166(3) 0.06847(16) 0.0492(7) Uani 1 1 d . . . . .
H13 H 0.177270 0.441686 0.120451 0.059 Uiso 1 1 calc R U . . .
C14 C 0.0187(3) 0.3269(3) 0.04023(17) 0.0517(7) Uani 1 1 d . . . . .
H14 H -0.010069 0.300192 -0.011729 0.062 Uiso 1 1 calc R U . . .
C15 C -0.0773(3) 0.2650(3) 0.07921(16) 0.0501(7) Uani 1 1 d . . . . .
C16 C -0.2000(3) 0.1718(3) 0.03835(19) 0.0625(9) Uani 1 1 d . . . . .
H16 H -0.215973 0.147759 -0.013178 0.075 Uiso 1 1 calc R U . . .
C17 C -0.2993(3) 0.1133(3) 0.07109(19) 0.0629(9) Uani 1 1 d . . . . .
H17 H -0.379604 0.049613 0.042004 0.076 Uiso 1 1 calc R U . . .
C18 C -0.2798(3) 0.1488(3) 0.14627(18) 0.0610(8) Uani 1 1 d . . . . .
C19 C -0.1588(4) 0.2429(4) 0.18889(19) 0.0789(11) Uani 1 1 d . . . . .
H19 H -0.145098 0.268197 0.240110 0.095 Uiso 1 1 calc R U . . .
C20 C -0.0593(4) 0.2989(3) 0.15586(18) 0.0704(10) Uani 1 1 d . . . . .
H20 H 0.022242 0.360952 0.185387 0.085 Uiso 1 1 calc R U . . .
C22 C 0.7960(3) 0.8102(2) 0.25200(16) 0.0475(7) Uani 1 1 d . . . . .
H22 H 0.725111 0.792795 0.276052 0.057 Uiso 1 1 calc R U . . .
C21 C -0.4953(4) 0.0011(4) 0.1451(2) 0.0851(12) Uani 1 1 d . . . . .
H21A H -0.557312 0.025389 0.108574 0.128 Uiso 1 1 calc R U . . .
H21B H -0.543930 -0.030266 0.179944 0.128 Uiso 1 1 calc R U . . .
H21C H -0.467024 -0.060590 0.120293 0.128 Uiso 1 1 calc R U . . .
C23 C 0.9298(3) 0.8474(3) 0.29463(16) 0.0496(7) Uani 1 1 d . . . . .
H23 H 0.999377 0.869639 0.270151 0.060 Uiso 1 1 calc R U . . .
C24 C 0.9797(3) 0.8571(3) 0.37514(16) 0.0491(7) Uani 1 1 d . . . . .
C25 C 0.8912(3) 0.8279(3) 0.42062(17) 0.0554(8) Uani 1 1 d . . . . .
H25 H 0.793654 0.802459 0.399461 0.067 Uiso 1 1 calc R U . . .
C26 C 0.9434(4) 0.8355(3) 0.49558(18) 0.0603(8) Uani 1 1 d . . . . .
H26 H 0.881341 0.814685 0.524502 0.072 Uiso 1 1 calc R U . . .
C27 C 1.0873(4) 0.8737(3) 0.52847(17) 0.0567(8) Uani 1 1 d . . . . .
C29 C 1.1238(3) 0.8949(3) 0.40939(18) 0.0655(9) Uani 1 1 d . . . . .
H29 H 1.186133 0.915225 0.380568 0.079 Uiso 1 1 calc R U . . .
C28 C 1.1778(4) 0.9034(4) 0.48515(19) 0.0723(10) Uani 1 1 d . . . . .
H28 H 1.275320 0.929116 0.506757 0.087 Uiso 1 1 calc R U . . .
C30 C 1.2763(5) 0.9302(4) 0.6414(2) 0.0949(14) Uani 1 1 d . . . . .
H30A H 1.324844 0.879790 0.622573 0.142 Uiso 1 1 calc R U . . .
H30B H 1.290950 0.935123 0.694345 0.142 Uiso 1 1 calc R U . . .
H30C H 1.312622 1.010002 0.632694 0.142 Uiso 1 1 calc R U . . .
C33 C 0.3676(3) 0.3739(3) 0.30011(15) 0.0475(7) Uani 1 1 d . . . . .
C34 C 0.3688(4) 0.2605(3) 0.26980(19) 0.0683(10) Uani 1 1 d . . . . .
H34 H 0.440658 0.253283 0.248957 0.082 Uiso 1 1 calc R U . . .
C35 C 0.2610(5) 0.1571(3) 0.2708(2) 0.0835(12) Uani 1 1 d . . . . .
H35 H 0.261551 0.080536 0.250954 0.100 Uiso 1 1 calc R U . . .
C36 C 0.1546(4) 0.1681(3) 0.3008(2) 0.0777(11) Uani 1 1 d . . . . .
H36 H 0.082880 0.098796 0.301035 0.093 Uiso 1 1 calc R U . . .
C37 C 0.1526(4) 0.2789(3) 0.3303(2) 0.0687(9) Uani 1 1 d . . . . .
H37 H 0.079964 0.285418 0.350706 0.082 Uiso 1 1 calc R U . . .
C38 C 0.2585(3) 0.3819(3) 0.32998(18) 0.0565(8) Uani 1 1 d . . . . .
H38 H 0.256454 0.457718 0.350119 0.068 Uiso 1 1 calc R U . . .
C39 C 0.5073(3) 0.6254(2) 0.37330(14) 0.0411(6) Uani 1 1 d . . . . .
C40 C 0.4505(4) 0.7131(3) 0.35570(18) 0.0669(9) Uani 1 1 d . . . . .
H40 H 0.411629 0.712286 0.305673 0.080 Uiso 1 1 calc R U . . .
C41 C 0.4506(5) 0.8029(4) 0.4120(2) 0.0915(14) Uani 1 1 d . . . . .
H41 H 0.411902 0.862135 0.399702 0.110 Uiso 1 1 calc R U . . .
C42 C 0.5074(4) 0.8044(4) 0.4856(2) 0.0773(11) Uani 1 1 d . . . . .
H42 H 0.506087 0.863946 0.523327 0.093 Uiso 1 1 calc R U . . .
C43 C 0.5652(4) 0.7199(3) 0.50347(17) 0.0616(9) Uani 1 1 d . . . . .
H43 H 0.604708 0.721866 0.553630 0.074 Uiso 1 1 calc R U . . .
C44 C 0.5664(3) 0.6310(3) 0.44847(15) 0.0529(7) Uani 1 1 d . . . . .
H44 H 0.607335 0.573555 0.461737 0.063 Uiso 1 1 calc R U . . .
C50 C 0.6934(4) 0.4145(3) 0.38378(18) 0.0644(9) Uani 1 1 d . . . . .
H50 H 0.618461 0.373032 0.400456 0.077 Uiso 1 1 calc R U . . .
C49 C 0.8279(5) 0.4093(4) 0.4126(2) 0.0841(12) Uani 1 1 d . . . . .
H49 H 0.842834 0.364513 0.448813 0.101 Uiso 1 1 calc R U . . .
C48 C 0.9386(5) 0.4694(4) 0.3882(3) 0.0867(13) Uani 1 1 d . . . . .
H48 H 1.028612 0.466577 0.408680 0.104 Uiso 1 1 calc R U . . .
C47 C 0.9180(4) 0.5333(4) 0.3343(2) 0.0778(11) Uani 1 1 d . . . . .
H47 H 0.993397 0.572973 0.317326 0.093 Uiso 1 1 calc R U . . .
C46 C 0.7843(3) 0.5391(3) 0.30477(18) 0.0545(7) Uani 1 1 d . . . . .
H46 H 0.770565 0.582098 0.267421 0.065 Uiso 1 1 calc R U . . .
C45 C 0.6710(3) 0.4823(3) 0.32967(15) 0.0466(7) Uani 1 1 d . . . . .
 
loop_
 _atom_site_aniso_label
 _atom_site_aniso_U_11
 _atom_site_aniso_U_22
 _atom_site_aniso_U_33
 _atom_site_aniso_U_23
 _atom_site_aniso_U_13
 _atom_site_aniso_U_12
Ag1 0.05300(14) 0.05084(13) 0.03125(11) 0.01543(9) 0.01164(9) 0.01534(10)
B1 0.066(3) 0.075(3) 0.049(2) 0.0090(19) 0.0137(19) 0.026(2)
C1 0.0483(16) 0.0459(15) 0.0367(14) 0.0082(12) 0.0082(12) 0.0232(13)
N1 0.0431(13) 0.0362(11) 0.0328(11) 0.0084(9) 0.0100(10) 0.0181(10)
P1 0.0486(4) 0.0384(4) 0.0307(3) 0.0123(3) 0.0106(3) 0.0113(3)
F1 0.133(2) 0.0875(16) 0.0631(13) 0.0019(12) 0.0142(13) 0.0429(15)
O1 0.0676(16) 0.106(2) 0.0592(15) 0.0302(14) 0.0072(12) -0.0094(15)
F3 0.147(3) 0.131(3) 0.152(3) 0.031(2) 0.058(2) -0.024(2)
C3 0.071(2) 0.070(2) 0.0285(14) 0.0115(14) 0.0060(14) 0.0387(18)
N2 0.0483(13) 0.0407(12) 0.0346(11) 0.0123(9) 0.0159(10) 0.0190(11)
F2 0.154(3) 0.131(2) 0.129(2) 0.0331(18) 0.080(2) 0.093(2)
O2 0.0849(18) 0.0965(19) 0.0443(13) 0.0220(12) 0.0134(12) 0.0304(15)
C2 0.0526(18) 0.0621(19) 0.0387(15) 0.0064(14) -0.0001(13) 0.0238(15)
C4 0.0639(19) 0.0555(17) 0.0332(14) 0.0152(13) 0.0161(13) 0.0383(15)
F4 0.134(2) 0.193(3) 0.0864(18) 0.043(2) -0.0004(17) 0.086(2)
C5 0.0517(16) 0.0395(14) 0.0333(13) 0.0121(11) 0.0147(12) 0.0284(13)
C11 0.0581(19) 0.0542(18) 0.0549(19) 0.0186(15) 0.0215(15) 0.0069(15)
C10 0.066(2) 0.0574(19) 0.060(2) 0.0291(16) 0.0345(17) 0.0199(16)
C9 0.0549(17) 0.0394(14) 0.0362(14) 0.0158(11) 0.0193(12) 0.0268(13)
C8 0.0625(19) 0.0480(16) 0.0455(16) 0.0216(13) 0.0274(14) 0.0300(15)
C7 0.077(2) 0.064(2) 0.0473(17) 0.0312(15) 0.0329(17) 0.0376(18)
C6 0.079(2) 0.068(2) 0.0339(15) 0.0219(14) 0.0215(15) 0.0426(19)
C12 0.0483(16) 0.0417(15) 0.0439(15) 0.0112(12) 0.0170(13) 0.0143(13)
C13 0.0460(17) 0.0580(18) 0.0389(15) 0.0090(13) 0.0050(13) 0.0165(14)
C14 0.0462(17) 0.0566(18) 0.0462(16) 0.0023(14) 0.0080(13) 0.0165(14)
C15 0.0425(16) 0.0535(17) 0.0471(16) 0.0071(14) 0.0053(13) 0.0129(14)
C16 0.0513(19) 0.068(2) 0.0497(18) -0.0070(16) 0.0075(15) 0.0065(16)
C17 0.0481(18) 0.059(2) 0.061(2) -0.0026(16) 0.0057(16) 0.0021(15)
C18 0.0509(19) 0.066(2) 0.0562(19) 0.0230(16) 0.0027(15) 0.0099(16)
C19 0.068(2) 0.097(3) 0.0407(18) 0.0151(18) -0.0004(16) -0.005(2)
C20 0.054(2) 0.080(2) 0.0470(18) 0.0097(17) -0.0037(15) -0.0072(17)
C22 0.0523(18) 0.0442(16) 0.0432(16) 0.0101(12) 0.0175(14) 0.0087(13)
C21 0.065(2) 0.080(3) 0.095(3) 0.026(2) 0.021(2) 0.001(2)
C23 0.0528(18) 0.0486(17) 0.0454(16) 0.0087(13) 0.0178(14) 0.0117(14)
C24 0.0517(18) 0.0468(16) 0.0446(16) 0.0072(13) 0.0147(14) 0.0108(14)
C25 0.0491(17) 0.0597(19) 0.0499(18) 0.0104(15) 0.0139(14) 0.0079(15)
C26 0.064(2) 0.065(2) 0.0506(18) 0.0157(15) 0.0242(16) 0.0131(17)
C27 0.070(2) 0.0597(19) 0.0431(16) 0.0142(14) 0.0166(15) 0.0231(17)
C29 0.0518(19) 0.096(3) 0.0482(18) 0.0172(18) 0.0184(15) 0.0206(18)
C28 0.0514(19) 0.109(3) 0.056(2) 0.020(2) 0.0126(16) 0.028(2)
C30 0.094(3) 0.123(4) 0.054(2) 0.021(2) 0.002(2) 0.031(3)
C33 0.0575(18) 0.0440(16) 0.0346(14) 0.0150(12) 0.0073(13) 0.0087(13)
C34 0.092(3) 0.0489(19) 0.058(2) 0.0071(15) 0.0311(19) 0.0079(18)
C35 0.115(3) 0.0423(19) 0.076(3) 0.0052(17) 0.029(2) 0.004(2)
C36 0.080(3) 0.061(2) 0.071(2) 0.0229(19) 0.015(2) -0.007(2)
C37 0.056(2) 0.068(2) 0.076(2) 0.0300(19) 0.0159(18) 0.0088(17)
C38 0.0499(18) 0.0536(18) 0.063(2) 0.0217(15) 0.0133(15) 0.0108(15)
C39 0.0436(15) 0.0435(15) 0.0367(14) 0.0123(12) 0.0135(12) 0.0119(12)
C40 0.086(3) 0.083(2) 0.0435(17) 0.0139(17) 0.0122(17) 0.051(2)
C41 0.129(4) 0.104(3) 0.067(3) 0.013(2) 0.023(2) 0.082(3)
C42 0.093(3) 0.085(3) 0.059(2) -0.0002(19) 0.026(2) 0.041(2)
C43 0.068(2) 0.079(2) 0.0350(16) 0.0083(15) 0.0158(15) 0.0218(18)
C44 0.0632(19) 0.0635(19) 0.0363(15) 0.0161(14) 0.0138(14) 0.0254(16)
C50 0.079(2) 0.069(2) 0.0525(19) 0.0233(16) 0.0129(17) 0.0346(19)
C49 0.108(3) 0.084(3) 0.063(2) 0.015(2) -0.004(2) 0.060(3)
C48 0.073(3) 0.095(3) 0.083(3) -0.010(2) -0.002(2) 0.046(3)
C47 0.065(2) 0.075(3) 0.090(3) -0.002(2) 0.021(2) 0.028(2)
C46 0.060(2) 0.0488(17) 0.0551(18) 0.0048(14) 0.0171(15) 0.0218(15)
C45 0.0566(18) 0.0420(15) 0.0373(14) 0.0063(12) 0.0072(13) 0.0166(13)
 
_geom_special_details
;
 All esds (except the esd in the dihedral angle between two l.s. planes)
 are estimated using the full covariance matrix.  The cell esds are taken
 into account individually in the estimation of esds in distances, angles
 and torsion angles; correlations between esds in cell parameters are only
 used when they are defined by crystal symmetry.  An approximate (isotropic)
 treatment of cell esds is used for estimating esds involving l.s. planes.
;
 
loop_
 _geom_bond_atom_site_label_1
 _geom_bond_atom_site_label_2
 _geom_bond_distance
 _geom_bond_site_symmetry_2
 _geom_bond_publ_flag
Ag1 N1 2.287(2) . ?
Ag1 N2 2.336(2) . ?
Ag1 P1 2.3743(7) . ?
B1 F2 1.342(5) . ?
B1 F3 1.343(5) . ?
B1 F1 1.350(4) . ?
B1 F4 1.356(5) . ?
C1 N1 1.333(3) . ?
C1 C2 1.422(4) . ?
C1 C13 1.453(4) . ?
N1 C5 1.363(3) . ?
P1 C45 1.821(3) . ?
P1 C39 1.827(3) . ?
P1 C33 1.829(3) . ?
O1 C18 1.363(4) . ?
O1 C21 1.418(4) . ?
C3 C2 1.346(4) . ?
C3 C4 1.401(4) . ?
C3 H3 0.9300 . ?
N2 C12 1.330(3) . ?
N2 C9 1.357(3) . ?
O2 C27 1.368(4) . ?
O2 C30 1.420(5) . ?
C2 H2 0.9300 . ?
C4 C5 1.409(3) . ?
C4 C6 1.425(4) . ?
C5 C9 1.437(4) . ?
C11 C10 1.354(4) . ?
C11 C12 1.412(4) . ?
C11 H11 0.9300 . ?
C10 C8 1.396(4) . ?
C10 H10 0.9300 . ?
C9 C8 1.415(4) . ?
C8 C7 1.431(4) . ?
C7 C6 1.336(4) . ?
C7 H7 0.9300 . ?
C6 H6 0.9300 . ?
C12 C22 1.459(4) . ?
C13 C14 1.332(4) . ?
C13 H13 0.9300 . ?
C14 C15 1.449(4) . ?
C14 H14 0.9300 . ?
C15 C16 1.381(4) . ?
C15 C20 1.391(4) . ?
C16 C17 1.375(5) . ?
C16 H16 0.9300 . ?
C17 C18 1.364(5) . ?
C17 H17 0.9300 . ?
C18 C19 1.385(5) . ?
C19 C20 1.370(5) . ?
C19 H19 0.9300 . ?
C20 H20 0.9300 . ?
C22 C23 1.333(4) . ?
C22 H22 0.9300 . ?
C21 H21A 0.9600 . ?
C21 H21B 0.9600 . ?
C21 H21C 0.9600 . ?
C23 C24 1.456(4) . ?
C23 H23 0.9300 . ?
C24 C29 1.382(4) . ?
C24 C25 1.387(4) . ?
C25 C26 1.366(4) . ?
C25 H25 0.9300 . ?
C26 C27 1.375(5) . ?
C26 H26 0.9300 . ?
C27 C28 1.372(5) . ?
C29 C28 1.381(5) . ?
C29 H29 0.9300 . ?
C28 H28 0.9300 . ?
C30 H30A 0.9600 . ?
C30 H30B 0.9600 . ?
C30 H30C 0.9600 . ?
C33 C38 1.383(4) . ?
C33 C34 1.384(4) . ?
C34 C35 1.397(5) . ?
C34 H34 0.9300 . ?
C35 C36 1.369(6) . ?
C35 H35 0.9300 . ?
C36 C37 1.354(5) . ?
C36 H36 0.9300 . ?
C37 C38 1.379(4) . ?
C37 H37 0.9300 . ?
C38 H38 0.9300 . ?
C39 C40 1.372(4) . ?
C39 C44 1.386(4) . ?
C40 C41 1.388(5) . ?
C40 H40 0.9300 . ?
C41 C42 1.365(5) . ?
C41 H41 0.9300 . ?
C42 C43 1.346(5) . ?
C42 H42 0.9300 . ?
C43 C44 1.369(4) . ?
C43 H43 0.9300 . ?
C44 H44 0.9300 . ?
C50 C49 1.388(5) . ?
C50 C45 1.397(4) . ?
C50 H50 0.9300 . ?
C49 C48 1.366(6) . ?
C49 H49 0.9300 . ?
C48 C47 1.358(6) . ?
C48 H48 0.9300 . ?
C47 C46 1.386(5) . ?
C47 H47 0.9300 . ?
C46 C45 1.381(4) . ?
C46 H46 0.9300 . ?
 
loop_
 _geom_angle_atom_site_label_1
 _geom_angle_atom_site_label_2
 _geom_angle_atom_site_label_3
 _geom_angle
 _geom_angle_site_symmetry_1
 _geom_angle_site_symmetry_3
 _geom_angle_publ_flag
N1 Ag1 N2 73.26(8) . . ?
N1 Ag1 P1 151.34(6) . . ?
N2 Ag1 P1 134.03(6) . . ?
F2 B1 F3 109.9(4) . . ?
F2 B1 F1 108.5(3) . . ?
F3 B1 F1 108.8(3) . . ?
F2 B1 F4 110.2(3) . . ?
F3 B1 F4 111.4(4) . . ?
F1 B1 F4 108.0(4) . . ?
N1 C1 C2 120.7(3) . . ?
N1 C1 C13 118.1(2) . . ?
C2 C1 C13 121.2(3) . . ?
C1 N1 C5 119.6(2) . . ?
C1 N1 Ag1 125.80(17) . . ?
C5 N1 Ag1 114.45(16) . . ?
C45 P1 C39 103.83(13) . . ?
C45 P1 C33 104.86(13) . . ?
C39 P1 C33 103.58(13) . . ?
C45 P1 Ag1 115.34(10) . . ?
C39 P1 Ag1 110.57(9) . . ?
C33 P1 Ag1 117.22(9) . . ?
C18 O1 C21 117.9(3) . . ?
C2 C3 C4 120.6(3) . . ?
C2 C3 H3 119.7 . . ?
C4 C3 H3 119.7 . . ?
C12 N2 C9 119.8(2) . . ?
C12 N2 Ag1 126.54(17) . . ?
C9 N2 Ag1 112.94(17) . . ?
C27 O2 C30 117.6(3) . . ?
C3 C2 C1 119.9(3) . . ?
C3 C2 H2 120.1 . . ?
C1 C2 H2 120.1 . . ?
C3 C4 C5 117.3(3) . . ?
C3 C4 C6 122.9(3) . . ?
C5 C4 C6 119.9(3) . . ?
N1 C5 C4 121.9(3) . . ?
N1 C5 C9 119.1(2) . . ?
C4 C5 C9 119.0(2) . . ?
C10 C11 C12 119.7(3) . . ?
C10 C11 H11 120.1 . . ?
C12 C11 H11 120.1 . . ?
C11 C10 C8 120.3(3) . . ?
C11 C10 H10 119.8 . . ?
C8 C10 H10 119.8 . . ?
N2 C9 C8 121.6(3) . . ?
N2 C9 C5 119.1(2) . . ?
C8 C9 C5 119.4(2) . . ?
C10 C8 C9 117.5(3) . . ?
C10 C8 C7 123.0(3) . . ?
C9 C8 C7 119.5(3) . . ?
C6 C7 C8 120.9(3) . . ?
C6 C7 H7 119.5 . . ?
C8 C7 H7 119.5 . . ?
C7 C6 C4 121.4(3) . . ?
C7 C6 H6 119.3 . . ?
C4 C6 H6 119.3 . . ?
N2 C12 C11 121.1(3) . . ?
N2 C12 C22 117.2(2) . . ?
C11 C12 C22 121.7(3) . . ?
C14 C13 C1 124.6(3) . . ?
C14 C13 H13 117.7 . . ?
C1 C13 H13 117.7 . . ?
C13 C14 C15 129.0(3) . . ?
C13 C14 H14 115.5 . . ?
C15 C14 H14 115.5 . . ?
C16 C15 C20 116.6(3) . . ?
C16 C15 C14 119.2(3) . . ?
C20 C15 C14 124.0(3) . . ?
C17 C16 C15 122.4(3) . . ?
C17 C16 H16 118.8 . . ?
C15 C16 H16 118.8 . . ?
C18 C17 C16 119.9(3) . . ?
C18 C17 H17 120.1 . . ?
C16 C17 H17 120.1 . . ?
O1 C18 C17 125.5(3) . . ?
O1 C18 C19 115.1(3) . . ?
C17 C18 C19 119.3(3) . . ?
C20 C19 C18 120.2(3) . . ?
C20 C19 H19 119.9 . . ?
C18 C19 H19 119.9 . . ?
C19 C20 C15 121.5(3) . . ?
C19 C20 H20 119.2 . . ?
C15 C20 H20 119.2 . . ?
C23 C22 C12 125.2(3) . . ?
C23 C22 H22 117.4 . . ?
C12 C22 H22 117.4 . . ?
O1 C21 H21A 109.5 . . ?
O1 C21 H21B 109.5 . . ?
H21A C21 H21B 109.5 . . ?
O1 C21 H21C 109.5 . . ?
H21A C21 H21C 109.5 . . ?
H21B C21 H21C 109.5 . . ?
C22 C23 C24 127.5(3) . . ?
C22 C23 H23 116.3 . . ?
C24 C23 H23 116.3 . . ?
C29 C24 C25 116.8(3) . . ?
C29 C24 C23 119.0(3) . . ?
C25 C24 C23 124.2(3) . . ?
C26 C25 C24 121.9(3) . . ?
C26 C25 H25 119.0 . . ?
C24 C25 H25 119.0 . . ?
C25 C26 C27 120.3(3) . . ?
C25 C26 H26 119.9 . . ?
C27 C26 H26 119.9 . . ?
O2 C27 C28 124.7(3) . . ?
O2 C27 C26 115.9(3) . . ?
C28 C27 C26 119.4(3) . . ?
C28 C29 C24 121.9(3) . . ?
C28 C29 H29 119.0 . . ?
C24 C29 H29 119.0 . . ?
C27 C28 C29 119.8(3) . . ?
C27 C28 H28 120.1 . . ?
C29 C28 H28 120.1 . . ?
O2 C30 H30A 109.5 . . ?
O2 C30 H30B 109.5 . . ?
H30A C30 H30B 109.5 . . ?
O2 C30 H30C 109.5 . . ?
H30A C30 H30C 109.5 . . ?
H30B C30 H30C 109.5 . . ?
C38 C33 C34 118.9(3) . . ?
C38 C33 P1 121.1(2) . . ?
C34 C33 P1 119.9(2) . . ?
C33 C34 C35 119.4(4) . . ?
C33 C34 H34 120.3 . . ?
C35 C34 H34 120.3 . . ?
C36 C35 C34 120.1(4) . . ?
C36 C35 H35 119.9 . . ?
C34 C35 H35 119.9 . . ?
C37 C36 C35 120.7(3) . . ?
C37 C36 H36 119.7 . . ?
C35 C36 H36 119.7 . . ?
C36 C37 C38 119.9(4) . . ?
C36 C37 H37 120.1 . . ?
C38 C37 H37 120.1 . . ?
C37 C38 C33 120.9(3) . . ?
C37 C38 H38 119.5 . . ?
C33 C38 H38 119.5 . . ?
C40 C39 C44 118.0(3) . . ?
C40 C39 P1 118.3(2) . . ?
C44 C39 P1 123.7(2) . . ?
C39 C40 C41 120.5(3) . . ?
C39 C40 H40 119.8 . . ?
C41 C40 H40 119.8 . . ?
C42 C41 C40 120.0(4) . . ?
C42 C41 H41 120.0 . . ?
C40 C41 H41 120.0 . . ?
C43 C42 C41 120.1(3) . . ?
C43 C42 H42 120.0 . . ?
C41 C42 H42 120.0 . . ?
C42 C43 C44 120.6(3) . . ?
C42 C43 H43 119.7 . . ?
C44 C43 H43 119.7 . . ?
C43 C44 C39 120.9(3) . . ?
C43 C44 H44 119.5 . . ?
C39 C44 H44 119.5 . . ?
C49 C50 C45 119.8(4) . . ?
C49 C50 H50 120.1 . . ?
C45 C50 H50 120.1 . . ?
C48 C49 C50 120.6(4) . . ?
C48 C49 H49 119.7 . . ?
C50 C49 H49 119.7 . . ?
C47 C48 C49 120.4(4) . . ?
C47 C48 H48 119.8 . . ?
C49 C48 H48 119.8 . . ?
C48 C47 C46 119.7(4) . . ?
C48 C47 H47 120.1 . . ?
C46 C47 H47 120.1 . . ?
C45 C46 C47 121.3(3) . . ?
C45 C46 H46 119.3 . . ?
C47 C46 H46 119.3 . . ?
C46 C45 C50 118.1(3) . . ?
C46 C45 P1 118.3(2) . . ?
C50 C45 P1 123.4(2) . . ?
 
loop_
 _geom_torsion_atom_site_label_1
 _geom_torsion_atom_site_label_2
 _geom_torsion_atom_site_label_3
 _geom_torsion_atom_site_label_4
 _geom_torsion
 _geom_torsion_site_symmetry_1
 _geom_torsion_site_symmetry_2
 _geom_torsion_site_symmetry_3
 _geom_torsion_site_symmetry_4
 _geom_torsion_publ_flag
C2 C1 N1 C5 1.3(4) . . . . ?
C13 C1 N1 C5 -177.5(2) . . . . ?
C2 C1 N1 Ag1 -173.51(19) . . . . ?
C13 C1 N1 Ag1 7.7(3) . . . . ?
C4 C3 C2 C1 -0.8(5) . . . . ?
N1 C1 C2 C3 -0.1(4) . . . . ?
C13 C1 C2 C3 178.7(3) . . . . ?
C2 C3 C4 C5 0.4(4) . . . . ?
C2 C3 C4 C6 -179.6(3) . . . . ?
C1 N1 C5 C4 -1.7(4) . . . . ?
Ag1 N1 C5 C4 173.66(18) . . . . ?
C1 N1 C5 C9 177.8(2) . . . . ?
Ag1 N1 C5 C9 -6.9(3) . . . . ?
C3 C4 C5 N1 0.9(4) . . . . ?
C6 C4 C5 N1 -179.1(2) . . . . ?
C3 C4 C5 C9 -178.6(2) . . . . ?
C6 C4 C5 C9 1.4(4) . . . . ?
C12 C11 C10 C8 0.2(5) . . . . ?
C12 N2 C9 C8 -0.1(4) . . . . ?
Ag1 N2 C9 C8 -170.96(19) . . . . ?
C12 N2 C9 C5 -179.6(2) . . . . ?
Ag1 N2 C9 C5 9.5(3) . . . . ?
N1 C5 C9 N2 -2.0(3) . . . . ?
C4 C5 C9 N2 177.5(2) . . . . ?
N1 C5 C9 C8 178.4(2) . . . . ?
C4 C5 C9 C8 -2.1(4) . . . . ?
C11 C10 C8 C9 -0.9(4) . . . . ?
C11 C10 C8 C7 178.5(3) . . . . ?
N2 C9 C8 C10 0.8(4) . . . . ?
C5 C9 C8 C10 -179.7(2) . . . . ?
N2 C9 C8 C7 -178.6(2) . . . . ?
C5 C9 C8 C7 0.9(4) . . . . ?
C10 C8 C7 C6 -178.4(3) . . . . ?
C9 C8 C7 C6 0.9(4) . . . . ?
C8 C7 C6 C4 -1.7(5) . . . . ?
C3 C4 C6 C7 -179.5(3) . . . . ?
C5 C4 C6 C7 0.5(4) . . . . ?
C9 N2 C12 C11 -0.6(4) . . . . ?
Ag1 N2 C12 C11 168.9(2) . . . . ?
C9 N2 C12 C22 179.5(2) . . . . ?
Ag1 N2 C12 C22 -11.0(4) . . . . ?
C10 C11 C12 N2 0.5(5) . . . . ?
C10 C11 C12 C22 -179.6(3) . . . . ?
N1 C1 C13 C14 -169.8(3) . . . . ?
C2 C1 C13 C14 11.4(5) . . . . ?
C1 C13 C14 C15 -175.6(3) . . . . ?
C13 C14 C15 C16 -178.8(3) . . . . ?
C13 C14 C15 C20 5.9(5) . . . . ?
C20 C15 C16 C17 -0.9(5) . . . . ?
C14 C15 C16 C17 -176.6(3) . . . . ?
C15 C16 C17 C18 1.5(6) . . . . ?
C21 O1 C18 C17 6.9(6) . . . . ?
C21 O1 C18 C19 -176.0(4) . . . . ?
C16 C17 C18 O1 176.2(3) . . . . ?
C16 C17 C18 C19 -0.7(6) . . . . ?
O1 C18 C19 C20 -177.8(4) . . . . ?
C17 C18 C19 C20 -0.6(6) . . . . ?
C18 C19 C20 C15 1.2(6) . . . . ?
C16 C15 C20 C19 -0.4(6) . . . . ?
C14 C15 C20 C19 175.0(4) . . . . ?
N2 C12 C22 C23 155.2(3) . . . . ?
C11 C12 C22 C23 -24.7(5) . . . . ?
C12 C22 C23 C24 -175.8(3) . . . . ?
C22 C23 C24 C29 178.4(3) . . . . ?
C22 C23 C24 C25 0.0(5) . . . . ?
C29 C24 C25 C26 -0.2(5) . . . . ?
C23 C24 C25 C26 178.1(3) . . . . ?
C24 C25 C26 C27 0.5(5) . . . . ?
C30 O2 C27 C28 6.2(5) . . . . ?
C30 O2 C27 C26 -173.6(3) . . . . ?
C25 C26 C27 O2 179.4(3) . . . . ?
C25 C26 C27 C28 -0.4(5) . . . . ?
C25 C24 C29 C28 0.0(5) . . . . ?
C23 C24 C29 C28 -178.5(3) . . . . ?
O2 C27 C28 C29 -179.6(3) . . . . ?
C26 C27 C28 C29 0.2(6) . . . . ?
C24 C29 C28 C27 0.0(6) . . . . ?
C45 P1 C33 C38 134.4(2) . . . . ?
C39 P1 C33 C38 25.9(3) . . . . ?
Ag1 P1 C33 C38 -96.2(2) . . . . ?
C45 P1 C33 C34 -48.3(3) . . . . ?
C39 P1 C33 C34 -156.9(3) . . . . ?
Ag1 P1 C33 C34 81.1(3) . . . . ?
C38 C33 C34 C35 -0.7(5) . . . . ?
P1 C33 C34 C35 -178.0(3) . . . . ?
C33 C34 C35 C36 0.6(6) . . . . ?
C34 C35 C36 C37 -0.4(6) . . . . ?
C35 C36 C37 C38 0.2(6) . . . . ?
C36 C37 C38 C33 -0.2(5) . . . . ?
C34 C33 C38 C37 0.5(5) . . . . ?
P1 C33 C38 C37 177.8(2) . . . . ?
C45 P1 C39 C40 144.0(3) . . . . ?
C33 P1 C39 C40 -106.7(3) . . . . ?
Ag1 P1 C39 C40 19.7(3) . . . . ?
C45 P1 C39 C44 -34.5(3) . . . . ?
C33 P1 C39 C44 74.9(3) . . . . ?
Ag1 P1 C39 C44 -158.7(2) . . . . ?
C44 C39 C40 C41 -1.1(5) . . . . ?
P1 C39 C40 C41 -179.6(3) . . . . ?
C39 C40 C41 C42 0.0(7) . . . . ?
C40 C41 C42 C43 1.0(7) . . . . ?
C41 C42 C43 C44 -0.7(6) . . . . ?
C42 C43 C44 C39 -0.5(5) . . . . ?
C40 C39 C44 C43 1.4(5) . . . . ?
P1 C39 C44 C43 179.8(2) . . . . ?
C45 C50 C49 C48 -0.3(6) . . . . ?
C50 C49 C48 C47 -1.3(6) . . . . ?
C49 C48 C47 C46 1.1(6) . . . . ?
C48 C47 C46 C45 0.8(5) . . . . ?
C47 C46 C45 C50 -2.4(4) . . . . ?
C47 C46 C45 P1 172.4(3) . . . . ?
C49 C50 C45 C46 2.1(5) . . . . ?
C49 C50 C45 P1 -172.3(3) . . . . ?
C39 P1 C45 C46 -98.9(2) . . . . ?
C33 P1 C45 C46 152.7(2) . . . . ?
Ag1 P1 C45 C46 22.2(3) . . . . ?
C39 P1 C45 C50 75.5(3) . . . . ?
C33 P1 C45 C50 -32.9(3) . . . . ?
Ag1 P1 C45 C50 -163.4(2) . . . . ?
 
_refine_diff_density_max    0.531
_refine_diff_density_min   -0.321
_refine_diff_density_rms    0.050

_shelx_res_file
;
TITL GM50_22_0m_a.res in P-1
    GM50_22_0m_CIF.res
    created by SHELXL-2018/3 at 11:36:55 on 25-Oct-2023
CELL 0.71073 10.2795 11.8100 18.7503 98.070 103.124 106.865
ZERR 2.00 0.0003 0.0003 0.0004 0.002 0.002 0.002
LATT 1
SFAC C H O B F P AG N
UNIT 96 78 4 2 8 2 2 4
LIST 4 ! automatically inserted. Change 6 to 4 for CHECKCIF!!
TEMP 23.000
SIZE 0.180 0.220 0.450
OMIT 0 50
OMIT 0 0 2
OMIT 0 1 1
OMIT 0 -1 2
ACTA
L.S. 4
FMAP 2
PLAN -5 0 0.00
HTAB
BOND $H
CONF
WGHT    0.031400    1.439400
FVAR       0.28034
AG1   7    0.474623    0.578104    0.182386    11.00000    0.05300    0.05084 =
         0.03125    0.01543    0.01164    0.01534
B1    4    0.212278    0.778597    0.198448    11.00000    0.06640    0.07465 =
         0.04923    0.00900    0.01369    0.02605
C1    1    0.226174    0.478138    0.023758    11.00000    0.04827    0.04591 =
         0.03669    0.00817    0.00815    0.02320
N1    8    0.357432    0.553053    0.058919    11.00000    0.04309    0.03621 =
         0.03282    0.00840    0.00999    0.01813
P1    6    0.504865    0.510290    0.296473    11.00000    0.04857    0.03842 =
         0.03069    0.01228    0.01060    0.01132
F1    5    0.274112    0.866768    0.261750    11.00000    0.13344    0.08749 =
         0.06311    0.00189    0.01418    0.04294
O1    3   -0.373592    0.102742    0.184471    11.00000    0.06755    0.10570 =
         0.05917    0.03023    0.00723   -0.00939
F3    5    0.118133    0.685291    0.212656    11.00000    0.14712    0.13110 =
         0.15244    0.03122    0.05768   -0.02388
C3    1    0.248657    0.520987   -0.094893    11.00000    0.07095    0.07033 =
         0.02849    0.01149    0.00600    0.03869
AFIX  43
H3    2    0.211741    0.508900   -0.146536    11.00000   -1.20000
AFIX   0
N2    8    0.623424    0.716831    0.133681    11.00000    0.04825    0.04065 =
         0.03459    0.01233    0.01595    0.01900
F2    5    0.313144    0.742318    0.177894    11.00000    0.15378    0.13053 =
         0.12856    0.03307    0.08047    0.09273
O2    3    1.129096    0.879376    0.603937    11.00000    0.08486    0.09646 =
         0.04431    0.02198    0.01335    0.03037
C2    1    0.169473    0.461037   -0.055096    11.00000    0.05261    0.06215 =
         0.03868    0.00641   -0.00009    0.02376
AFIX  43
H2    2    0.077827    0.408510   -0.079106    11.00000   -1.20000
AFIX   0
C4    1    0.386206    0.601444   -0.059218    11.00000    0.06389    0.05551 =
         0.03321    0.01524    0.01610    0.03828
F4    5    0.148362    0.825850    0.144381    11.00000    0.13428    0.19268 =
         0.08645    0.04291   -0.00039    0.08648
C5    1    0.437027    0.615693    0.019025    11.00000    0.05166    0.03953 =
         0.03329    0.01214    0.01472    0.02837
C11   1    0.841429    0.859120    0.132137    11.00000    0.05812    0.05417 =
         0.05487    0.01862    0.02149    0.00695
AFIX  43
H11   2    0.931296    0.912730    0.158624    11.00000   -1.20000
AFIX   0
C10   1    0.795883    0.842551    0.056565    11.00000    0.06633    0.05741 =
         0.06039    0.02908    0.03451    0.01988
AFIX  43
H10   2    0.854820    0.884719    0.031147    11.00000   -1.20000
AFIX   0
C9    1    0.576399    0.699449    0.057930    11.00000    0.05494    0.03941 =
         0.03624    0.01582    0.01927    0.02685
C8    1    0.660904    0.762490    0.016619    11.00000    0.06247    0.04797 =
         0.04550    0.02157    0.02740    0.03004
C7    1    0.605381    0.743174   -0.062969    11.00000    0.07704    0.06438 =
         0.04734    0.03117    0.03293    0.03764
AFIX  43
H7    2    0.661375    0.783666   -0.090271    11.00000   -1.20000
AFIX   0
C6    1    0.474201    0.667769   -0.098610    11.00000    0.07895    0.06804 =
         0.03389    0.02188    0.02154    0.04261
AFIX  43
H6    2    0.439576    0.658354   -0.150189    11.00000   -1.20000
AFIX   0
C12   1    0.751915    0.794661    0.170585    11.00000    0.04832    0.04169 =
         0.04392    0.01122    0.01699    0.01425
C13   1    0.142239    0.416630    0.068473    11.00000    0.04605    0.05798 =
         0.03892    0.00899    0.00496    0.01654
AFIX  43
H13   2    0.177270    0.441686    0.120451    11.00000   -1.20000
AFIX   0
C14   1    0.018651    0.326882    0.040232    11.00000    0.04622    0.05661 =
         0.04623    0.00227    0.00803    0.01648
AFIX  43
H14   2   -0.010069    0.300192   -0.011729    11.00000   -1.20000
AFIX   0
C15   1   -0.077291    0.265038    0.079209    11.00000    0.04255    0.05349 =
         0.04712    0.00711    0.00531    0.01287
C16   1   -0.199962    0.171817    0.038351    11.00000    0.05129    0.06773 =
         0.04971   -0.00698    0.00750    0.00650
AFIX  43
H16   2   -0.215973    0.147759   -0.013178    11.00000   -1.20000
AFIX   0
C17   1   -0.299267    0.113291    0.071085    11.00000    0.04806    0.05895 =
         0.06100   -0.00262    0.00574    0.00211
AFIX  43
H17   2   -0.379604    0.049613    0.042004    11.00000   -1.20000
AFIX   0
C18   1   -0.279764    0.148773    0.146267    11.00000    0.05088    0.06581 =
         0.05620    0.02297    0.00268    0.00988
C19   1   -0.158818    0.242893    0.188893    11.00000    0.06838    0.09732 =
         0.04074    0.01513   -0.00036   -0.00468
AFIX  43
H19   2   -0.145098    0.268197    0.240110    11.00000   -1.20000
AFIX   0
C20   1   -0.059266    0.298882    0.155861    11.00000    0.05355    0.08001 =
         0.04703    0.00975   -0.00369   -0.00723
AFIX  43
H20   2    0.022242    0.360952    0.185387    11.00000   -1.20000
AFIX   0
C22   1    0.796001    0.810205    0.252004    11.00000    0.05233    0.04418 =
         0.04316    0.01006    0.01752    0.00867
AFIX  43
H22   2    0.725111    0.792795    0.276052    11.00000   -1.20000
AFIX   0
C21   1   -0.495291    0.001112    0.145145    11.00000    0.06487    0.08017 =
         0.09547    0.02600    0.02068    0.00085
AFIX 137
H21A  2   -0.557312    0.025389    0.108574    11.00000   -1.50000
H21B  2   -0.543930   -0.030266    0.179944    11.00000   -1.50000
H21C  2   -0.467024   -0.060590    0.120293    11.00000   -1.50000
AFIX   0
C23   1    0.929823    0.847379    0.294633    11.00000    0.05281    0.04860 =
         0.04539    0.00868    0.01784    0.01169
AFIX  43
H23   2    0.999377    0.869639    0.270151    11.00000   -1.20000
AFIX   0
C24   1    0.979656    0.857149    0.375140    11.00000    0.05168    0.04678 =
         0.04462    0.00717    0.01470    0.01083
C25   1    0.891242    0.827927    0.420623    11.00000    0.04910    0.05967 =
         0.04994    0.01035    0.01392    0.00788
AFIX  43
H25   2    0.793654    0.802459    0.399461    11.00000   -1.20000
AFIX   0
C26   1    0.943388    0.835486    0.495576    11.00000    0.06448    0.06505 =
         0.05056    0.01566    0.02419    0.01312
AFIX  43
H26   2    0.881341    0.814685    0.524502    11.00000   -1.20000
AFIX   0
C27   1    1.087275    0.873728    0.528467    11.00000    0.06951    0.05968 =
         0.04310    0.01423    0.01659    0.02309
C29   1    1.123775    0.894924    0.409388    11.00000    0.05184    0.09619 =
         0.04823    0.01717    0.01845    0.02061
AFIX  43
H29   2    1.186133    0.915225    0.380568    11.00000   -1.20000
AFIX   0
C28   1    1.177844    0.903393    0.485151    11.00000    0.05137    0.10936 =
         0.05614    0.01967    0.01265    0.02790
AFIX  43
H28   2    1.275320    0.929116    0.506757    11.00000   -1.20000
AFIX   0
C30   1    1.276293    0.930185    0.641421    11.00000    0.09414    0.12335 =
         0.05375    0.02065    0.00173    0.03083
AFIX 137
H30A  2    1.324844    0.879790    0.622573    11.00000   -1.50000
H30B  2    1.290950    0.935123    0.694345    11.00000   -1.50000
H30C  2    1.312622    1.010002    0.632694    11.00000   -1.50000
AFIX   0
C33   1    0.367637    0.373930    0.300110    11.00000    0.05746    0.04396 =
         0.03457    0.01499    0.00732    0.00870
C34   1    0.368755    0.260537    0.269801    11.00000    0.09158    0.04887 =
         0.05768    0.00708    0.03111    0.00794
AFIX  43
H34   2    0.440658    0.253283    0.248957    11.00000   -1.20000
AFIX   0
C35   1    0.260997    0.157077    0.270775    11.00000    0.11520    0.04230 =
         0.07629    0.00523    0.02866    0.00409
AFIX  43
H35   2    0.261551    0.080536    0.250954    11.00000   -1.20000
AFIX   0
C36   1    0.154570    0.168084    0.300837    11.00000    0.07959    0.06106 =
         0.07107    0.02288    0.01477   -0.00711
AFIX  43
H36   2    0.082880    0.098796    0.301035    11.00000   -1.20000
AFIX   0
C37   1    0.152596    0.278851    0.330298    11.00000    0.05637    0.06846 =
         0.07598    0.02996    0.01595    0.00875
AFIX  43
H37   2    0.079964    0.285418    0.350706    11.00000   -1.20000
AFIX   0
C38   1    0.258471    0.381865    0.329978    11.00000    0.04994    0.05364 =
         0.06282    0.02167    0.01332    0.01083
AFIX  43
H38   2    0.256454    0.457718    0.350119    11.00000   -1.20000
AFIX   0
C39   1    0.507311    0.625385    0.373303    11.00000    0.04364    0.04352 =
         0.03667    0.01232    0.01348    0.01195
C40   1    0.450480    0.713063    0.355703    11.00000    0.08641    0.08288 =
         0.04354    0.01386    0.01223    0.05102
AFIX  43
H40   2    0.411629    0.712286    0.305673    11.00000   -1.20000
AFIX   0
C41   1    0.450552    0.802945    0.412047    11.00000    0.12901    0.10381 =
         0.06656    0.01292    0.02340    0.08167
AFIX  43
H41   2    0.411902    0.862135    0.399702    11.00000   -1.20000
AFIX   0
C42   1    0.507356    0.804446    0.485574    11.00000    0.09323    0.08518 =
         0.05857   -0.00021    0.02599    0.04118
AFIX  43
H42   2    0.506087    0.863946    0.523327    11.00000   -1.20000
AFIX   0
C43   1    0.565191    0.719895    0.503473    11.00000    0.06785    0.07924 =
         0.03501    0.00827    0.01581    0.02176
AFIX  43
H43   2    0.604708    0.721866    0.553630    11.00000   -1.20000
AFIX   0
C44   1    0.566355    0.630985    0.448472    11.00000    0.06324    0.06351 =
         0.03628    0.01609    0.01380    0.02538
AFIX  43
H44   2    0.607335    0.573555    0.461737    11.00000   -1.20000
AFIX   0
C50   1    0.693419    0.414525    0.383783    11.00000    0.07901    0.06863 =
         0.05254    0.02335    0.01287    0.03457
AFIX  43
H50   2    0.618461    0.373032    0.400456    11.00000   -1.20000
AFIX   0
C49   1    0.827946    0.409311    0.412605    11.00000    0.10844    0.08424 =
         0.06302    0.01489   -0.00400    0.05951
AFIX  43
H49   2    0.842834    0.364513    0.448813    11.00000   -1.20000
AFIX   0
C48   1    0.938588    0.469408    0.388233    11.00000    0.07299    0.09481 =
         0.08257   -0.00954   -0.00177    0.04578
AFIX  43
H48   2    1.028612    0.466577    0.408680    11.00000   -1.20000
AFIX   0
C47   1    0.918039    0.533285    0.334332    11.00000    0.06458    0.07451 =
         0.09049   -0.00173    0.02068    0.02793
AFIX  43
H47   2    0.993397    0.572973    0.317326    11.00000   -1.20000
AFIX   0
C46   1    0.784257    0.539082    0.304769    11.00000    0.06037    0.04878 =
         0.05511    0.00480    0.01709    0.02180
AFIX  43
H46   2    0.770565    0.582098    0.267421    11.00000   -1.20000
AFIX   0
C45   1    0.670958    0.482265    0.329672    11.00000    0.05655    0.04198 =
         0.03735    0.00634    0.00720    0.01662
HKLF 4 1 1 0 0 0 1 0 0 0 1


REM  GM50_22_0m_a.res in P-1
REM wR2 = 0.0790, GooF = S = 1.052, Restrained GooF = 1.052 for all data
REM R1 = 0.0324 for 5969 Fo > 4sig(Fo) and 0.0485 for all 7274 data
REM 534 parameters refined using 0 restraints

END

WGHT      0.0314      1.4394

REM Instructions for potential hydrogen bonds
EQIV $1 -x+1, -y+1, -z+1
HTAB C30 O1_$1
HTAB C40 F2

REM Highest difference peak  0.531,  deepest hole -0.321,  1-sigma level  0.050
Q1    1   0.4394  0.6439  0.0660  11.00000  0.05    0.53
Q2    1   0.2259  0.7577  0.1272  11.00000  0.05    0.42
Q3    1   0.3450  0.7501  0.4088  11.00000  0.05    0.37
Q4    1   0.2388  0.6628  0.1895  11.00000  0.05    0.35
Q5    1   0.3680  0.6515  0.3568  11.00000  0.05    0.34
;
_shelx_res_checksum   40178

_shelx_hkl_file
;
  -2   0   0  223.78    4.90
  -2   0   0  220.48    4.90
  -2   0   0  227.08    6.10
  -2   0   0  226.58    5.10
  -2   0   0  227.98    5.70
   2   0   0  222.18    5.00
   2   0   0  220.88    4.90
   2   0   0  225.78    6.20
   2   0   0  221.08    5.90
  -3   0   0 1345.77   28.70
  -3   0   0 1306.57   27.70
  -4   0   0  101.59    2.70
  -4   0   0  101.29    2.80
  -4   0   0  109.69    4.40
  -4   0   0  102.89    3.30
   4   0   0  102.59    3.00
   4   0   0  100.59    4.50
   4   0   0  103.49    5.20
   4   0   0  105.49    3.00
  -5   0   0  195.18    4.50
  -5   0   0  196.78    6.80
  -5   0   0  191.28    4.60
   5   0   0  192.58    5.00
   5   0   0  193.78    5.00
   5   0   0  200.38    7.90
  -6   0   0  103.29    2.60
  -6   0   0  108.59    5.70
  -6   0   0  103.99    2.60
   6   0   0   99.09    3.50
   6   0   0  107.49    5.90
   6   0   0  106.19    6.90
   6   0   0  104.89    3.60
  -7   0   0   55.09    5.10
   7   0   0   55.39    4.40
   7   0   0   57.69    6.40
   7   0   0   57.19    3.10
   7   0   0   59.19    5.30
   7   0   0   59.09    3.00
  -8   0   0   18.90    3.80
   8   0   0   18.20    3.30
   8   0   0   21.60    2.20
   8   0   0   24.40    4.50
   8   0   0   17.90    4.90
   8   0   0   25.40    3.20
  -9   0   0   11.80    3.80
   9   0   0   21.50    9.10
   9   0   0   18.70    2.20
   9   0   0   19.80    4.30
   9   0   0   17.10    3.10
   9   0   0   10.80    3.10
 -10   0   0   -1.80    3.80
  10   0   0    0.80    2.80
  10   0   0   -3.30    2.80
  10   0   0   -0.50    1.70
  10   0   0   -4.30    3.20
  10   0   0   11.20    5.10
  10   0   0    1.30    3.00
  10   0   0    1.30    1.80
 -11   0   0   -3.10    3.30
  11   0   0    0.60    3.00
  11   0   0   -2.00    2.90
  11   0   0   -1.70    4.60
  11   0   0   -0.50    1.70
  11   0   0   -0.60    3.10
  11   0   0   -0.80    3.30
  11   0   0   -2.70    1.60
 -12   0   0    0.20    4.00
  12   0   0   -4.50    3.30
  12   0   0   -6.10    5.10
  12   0   0   -3.20    3.10
  12   0   0    2.90    1.80
  12   0   0    5.60    3.20
  12   0   0    4.70    3.40
  12   0   0    1.40    2.10
  12  -1   0    4.90    5.30
  12  -1   0   -0.70    2.90
  12  -1   0    7.30    3.00
  12  -1   0   -2.90    3.40
 -12   1   0   -2.10    3.80
  11  -1   0    4.20    3.20
  11  -1   0   -0.30    1.60
  11  -1   0   -1.90    3.30
  11  -1   0   -0.20    3.10
  11  -1   0    1.10    2.90
  11  -1   0    1.70    1.70
  11  -1   0    4.40    4.60
 -11   1   0    3.10    3.90
  10  -1   0   10.00    5.10
  10  -1   0   15.30    2.20
  10  -1   0   15.00    1.90
  10  -1   0   12.20    3.20
  10  -1   0   12.80    3.40
  10  -1   0   16.30    4.30
  10  -1   0   18.10    3.90
   9  -1   0   -0.70    2.80
   9  -1   0    0.10    1.80
   9  -1   0    1.80    1.50
   9  -1   0    2.10    3.40
   9  -1   0    2.10    4.00
   9  -1   0   -2.70    2.00
  -9   1   0   -0.20    3.10
   8  -1   0   -0.30    2.30
   8  -1   0   -0.90    3.00
   8  -1   0    1.00    1.60
   8  -1   0    2.90    3.60
   8  -1   0   -1.20    1.50
   8  -1   0   -6.10    4.10
  -8   1   0   -1.80    2.90
   7  -1   0    8.90    1.70
   7  -1   0    9.40    3.90
   7  -1   0    9.30    3.60
   7  -1   0    9.20    2.90
   7  -1   0    7.70    1.60
  -7   1   0    3.60    3.10
   6  -1   0   16.50    1.60
   6  -1   0   20.90    3.60
   6  -1   0   16.70    3.80
   6  -1   0   23.30    2.90
  -6   1   0   15.80    3.10
   5  -1   0   13.40    2.90
   5  -1   0   14.30    3.00
   5  -1   0   16.70    2.30
   5  -1   0   12.10    1.30
  -5   1   0   12.50    2.40
   4  -1   0  235.58    7.80
   4  -1   0  228.48    5.50
   4  -1   0  237.28    6.50
  -4   1   0  228.98    6.80
  -4   1   0  231.58    6.10
  -4   1   0  226.88    4.90
   3  -1   0  231.18    5.30
   3  -1   0  233.58    6.60
   3  -1   0  231.28    5.40
   3  -1   0  229.98    6.10
  -3   1   0  240.68    5.10
  -3   1   0  237.18    5.10
  -3   1   0  235.78    6.00
  -3   1   0  236.88    6.60
   2  -1   0 1190.98   28.70
  -2   1   0 1221.28   28.50
   1   1   0 1913.71   44.90
  -2  -1   0  649.83   14.80
  -2  -1   0  636.34   14.30
  -2  -1   0  629.64   13.50
  -2  -1   0  628.24   13.20
  -2  -1   0  637.94   14.80
   2   1   0  650.03   14.80
   2   1   0  636.64   14.00
   2   1   0  617.44   14.60
   2   1   0  639.14   13.60
  -3  -1   0  289.17    6.60
  -3  -1   0  293.47    8.50
  -3  -1   0  292.17    8.70
  -3  -1   0  301.77    6.80
  -3  -1   0  288.97    6.80
  -3  -1   0  299.37    8.00
   3   1   0  295.97    7.80
   3   1   0  291.67    8.40
   3   1   0  294.17    6.90
   3   1   0  304.87    8.70
   3   1   0  284.67    7.20
  -4  -1   0  211.18    5.20
  -4  -1   0  211.98    5.30
  -4  -1   0  215.48    7.40
  -4  -1   0  214.48    7.60
  -4  -1   0  223.58    6.90
   4   1   0  206.48    7.40
   4   1   0  215.38    7.70
   4   1   0  212.28    5.40
   4   1   0  210.88    6.20
   4   1   0  211.68    5.40
  -5  -1   0   84.59    5.60
  -5  -1   0   94.29    3.10
  -5  -1   0   92.29    2.90
  -5  -1   0   92.79    4.80
   5   1   0   87.59    4.30
   5   1   0   92.09    3.30
   5   1   0   88.99    3.20
   5   1   0   80.09    5.70
   5   1   0   86.39    5.10
  -6  -1   0  292.37    6.80
  -6  -1   0  295.27   10.80
  -6  -1   0  285.47    7.00
  -6  -1   0  287.57    9.60
   6   1   0  289.67    9.90
   6   1   0  287.47    8.70
   6   1   0  293.57   10.90
   6   1   0  296.17    7.50
  -7  -1   0  144.79    3.80
  -7  -1   0  148.09    7.20
  -7  -1   0  140.49    3.80
   7   1   0  149.39    8.60
   7   1   0  144.39    7.30
   7   1   0  148.99    6.50
   7   1   0  152.78    4.90
  -8  -1   0   44.80    5.10
   8   1   0   51.19    6.80
   8   1   0   51.59    4.80
   8   1   0   46.80    3.00
   8   1   0   47.60    5.20
   8   1   0   44.70    3.30
  -9  -1   0    0.30    3.40
   9   1   0    1.90    2.90
   9   1   0    4.10    3.00
   9   1   0   -0.30    4.30
   9   1   0    2.50    1.90
   9   1   0    4.70    2.00
   9   1   0    0.80    3.70
 -10  -1   0    1.10    3.50
  10   1   0   -1.20    4.50
  10   1   0    5.70    2.00
  10   1   0    3.40    3.00
  10   1   0   10.10    3.40
  10   1   0    3.20    3.60
 -11  -1   0    2.50    3.90
  11   1   0    4.60    3.90
  11   1   0    4.10    4.70
  11   1   0   -0.70    5.10
  11   1   0    3.80    1.90
  11   1   0    7.70    2.10
  11   1   0    8.50    3.60
  12  -2   0    1.70    3.60
  12  -2   0    8.30    3.20
  12  -2   0    4.10    3.30
  12  -2   0    2.10    2.60
  12  -2   0    2.90    1.60
 -12   2   0    1.80    3.90
  11  -2   0    4.00    3.10
  11  -2   0   -0.80    1.50
  11  -2   0   -0.10    1.60
  11  -2   0   -3.20    3.30
  11  -2   0    7.30    5.00
  11  -2   0   -4.40    2.90
 -11   2   0   -1.70    3.20
  10  -2   0    4.50    1.70
  10  -2   0    3.40    2.80
  10  -2   0    5.80    3.80
  10  -2   0    5.50    4.40
  10  -2   0    6.80    3.30
  10  -2   0    6.40    1.80
 -10   2   0    4.60    5.40
   9  -2   0    1.80    3.50
   9  -2   0    3.80    1.60
   9  -2   0    4.20    2.90
   9  -2   0    4.20    2.90
   9  -2   0    4.90    1.60
   9  -2   0    5.80    4.00
  -9   2   0    4.10    3.40
   8  -2   0   16.10    1.90
   8  -2   0   15.20    4.10
   8  -2   0   15.10    4.60
   8  -2   0   14.10    2.00
   8  -2   0   12.30    3.20
   8  -2   0   11.60    3.60
  -8   2   0   10.50    3.70
   7  -2   0    9.20    3.60
   7  -2   0    1.60    2.60
   7  -2   0    8.90    1.60
   7  -2   0    9.30    3.20
   7  -2   0    1.40    3.60
   7  -2   0   12.00    1.70
  -7   2   0    6.60    2.80
   6  -2   0   13.40    2.60
   6  -2   0   14.40    1.50
   6  -2   0   18.40    1.70
   6  -2   0   17.90    3.10
   6  -2   0   15.00    3.70
  -6   2   0   15.20    3.00
   5  -2   0   -1.00    1.10
   5  -2   0   -0.10    2.10
   5  -2   0   -2.70    1.80
   5  -2   0   -1.80    1.00
   5  -2   0   -1.20    1.50
  -5   2   0   -0.20    1.80
   4  -2   0  192.08    5.80
   4  -2   0  194.28    4.80
   4  -2   0  196.28    4.80
   4  -2   0  194.78    6.30
  -4   2   0  197.08    4.50
  -4   2   0  199.48    4.40
  -4   2   0  202.18    5.80
  -4   2   0  202.38    6.20
   3  -2   0   -0.40    0.90
   3  -2   0   -2.90    1.70
   3  -2   0    1.00    1.50
  -3   2   0   -1.60    0.80
  -3   2   0    0.10    1.60
  -3   2   0    0.40    1.30
  -3   2   0   -1.80    1.60
  -3   2   0    0.30    1.40
  -3   2   0   -3.00    1.90
   2  -2   0   60.19    2.20
   2  -2   0   59.99    2.70
   2  -2   0   57.39    2.90
   2  -2   0   62.09    2.00
   2  -2   0   57.79    1.90
  -2   2   0   58.99    1.90
  -2   2   0   60.49    2.30
  -2   2   0   60.39    2.40
  -2   2   0   60.39    2.40
  -2   2   0   59.39    3.00
  -2   2   0   58.89    1.90
  -1   2   0  768.52   16.50
   0  -2   0   84.19    2.40
   0  -2   0   82.39    2.40
   0  -2   0   83.09    2.80
   0  -2   0   80.29    2.40
   0  -2   0   81.79    3.00
   0  -2   0   87.99    2.50
   0   2   0   83.09    2.50
   0   2   0   78.89    3.10
   0   2   0   83.99    2.40
   0   2   0   78.89    2.70
   0   2   0   86.29    2.50
  -1  -2   0   65.89    3.40
  -1  -2   0   65.49    2.40
  -1  -2   0   67.89    2.70
  -1  -2   0   64.69    2.40
  -1  -2   0   64.49    1.70
  -1  -2   0   71.09    3.10
   1   2   0   65.99    2.90
   1   2   0   63.19    2.40
   1   2   0   67.39    3.20
   1   2   0   68.19    2.50
   1   2   0   62.69    2.40
  -2  -2   0   73.09    2.60
  -2  -2   0   68.59    3.40
  -2  -2   0   67.69    3.10
  -2  -2   0   70.59    3.30
  -2  -2   0   65.79    4.00
   2   2   0   71.09    3.80
   2   2   0   73.99    3.10
   2   2   0   66.69    2.70
   2   2   0   73.79    3.90
   2   2   0   68.99    2.70
  -3  -2   0  447.66    9.70
  -3  -2   0  462.35   11.60
  -3  -2   0  460.55   10.60
  -3  -2   0  477.95   10.50
  -3  -2   0  481.75   15.30
  -3  -2   0  464.45   12.40
   3   2   0  453.75   15.20
   3   2   0  470.85   11.20
   3   2   0  471.55   10.70
   3   2   0  459.45   10.60
  -4  -2   0  432.06    9.80
  -4  -2   0  427.96    9.90
  -4  -2   0  436.76   12.40
  -4  -2   0  424.06   11.40
  -4  -2   0  424.16   12.40
   4   2   0  411.86   11.80
   4   2   0  415.16   10.70
   4   2   0  437.46   12.30
   4   2   0  420.86   10.00
   4   2   0  418.76   10.00
  -5  -2   0  383.86   11.00
  -5  -2   0  374.96   11.80
  -5  -2   0  385.86    9.20
  -5  -2   0  346.37   10.50
  -5  -2   0  378.76   12.00
   5   2   0  385.36   12.10
   5   2   0  368.76    9.20
   5   2   0  391.76    9.40
   5   2   0  373.96   11.40
   5   2   0  386.26   10.40
  -6  -2   0  125.29    4.20
  -6  -2   0  119.69    4.00
  -6  -2   0  119.19    7.00
  -6  -2   0  116.69    7.30
  -6  -2   0  122.69    6.40
   6   2   0  116.69    7.20
   6   2   0  120.59    6.80
   6   2   0  128.59    4.60
   6   2   0  127.99    4.60
   6   2   0  121.49    5.60
  -7  -2   0  168.98    7.80
  -7  -2   0  166.58    4.70
  -7  -2   0  182.18    9.10
  -7  -2   0  160.38    4.90
   7   2   0  172.58    5.60
   7   2   0  177.58    7.20
   7   2   0  172.08    5.70
   7   2   0  161.58    9.00
   7   2   0  163.68    8.00
  -8  -2   0   80.59    2.80
  -8  -2   0   92.99    6.40
   8   2   0   92.69    4.20
   8   2   0   88.79    4.20
   8   2   0   91.89    5.60
   8   2   0   92.29    7.70
   8   2   0   89.39    6.50
   9   2   0   20.20    2.70
   9   2   0   14.10    5.10
   9   2   0   19.30    3.80
   9   2   0   21.20    4.60
   9   2   0   26.50    2.80
 -10  -2   0    7.30    3.80
  10   2   0   14.40    4.40
  10   2   0    7.20    5.00
  10   2   0   11.80    2.50
  10   2   0   11.00    3.60
  10   2   0    7.70    1.60
  10   2   0   16.60    2.70
  10   2   0   15.40    3.80
 -11  -2   0    1.90    3.80
  11   2   0    6.00    3.50
  11   2   0    7.90    4.00
  11   2   0    0.00    4.90
  11   2   0    5.60    3.50
  11   2   0    5.90    3.40
  12  -3   0    8.40    3.10
  12  -3   0   -1.50    3.20
  12  -3   0    0.20    1.40
  12  -3   0   -0.90    3.60
  12  -3   0    5.60    4.80
 -12   3   0   -0.20    3.80
  11  -3   0   10.10    3.40
  11  -3   0    6.30    1.70
  11  -3   0    2.80    3.80
  11  -3   0   10.80    1.70
  11  -3   0    7.80    3.50
  11  -3   0   12.30    4.70
 -11   3   0    3.40    4.00
  10  -3   0   15.30    3.70
  10  -3   0   10.80    4.20
  10  -3   0   12.60    2.00
  10  -3   0   11.10    3.30
  10  -3   0   15.10    2.00
  10  -3   0   17.20    4.80
 -10   3   0    5.80    4.40
   9  -3   0   24.20    3.90
   9  -3   0   16.00    4.60
   9  -3   0   23.20    2.30
   9  -3   0   24.70    2.40
   9  -3   0   27.90    6.40
   9  -3   0   25.40    4.70
  -9   3   0   25.30    4.50
   8  -3   0   19.30    4.70
   8  -3   0   16.10    2.00
   8  -3   0   18.50    4.40
   8  -3   0   16.40    3.80
   8  -3   0   15.70    2.00
   8  -3   0   17.40    3.30
  -8   3   0   11.20    3.40
   7  -3   0   -8.40    3.40
   7  -3   0    1.30    2.20
   7  -3   0   -2.20    2.70
   7  -3   0    1.00    1.50
  -7   3   0   -0.70    2.60
   6  -3   0   25.30    2.10
   6  -3   0   21.30    2.00
   6  -3   0   22.00    2.80
  -6   3   0   22.60    3.40
   5  -3   0   12.20    1.40
   5  -3   0   11.50    2.70
   5  -3   0   12.80    1.40
   5  -3   0   10.50    2.10
  -5   3   0   13.20    1.10
  -5   3   0   15.00    2.20
  -5   3   0   12.90    2.30
   4  -3   0   -1.30    1.90
   4  -3   0   -4.30    2.10
   4  -3   0   -0.60    1.00
   4  -3   0    1.10    1.00
   4  -3   0    1.60    1.40
  -4   3   0    2.20    1.60
  -4   3   0   -0.30    0.90
  -4   3   0   -0.10    1.30
  -4   3   0    0.90    2.30
  -4   3   0   -1.40    0.90
   3  -3   0   -2.80    2.10
   3  -3   0   -2.10    2.10
   3  -3   0   -0.70    1.10
   3  -3   0   -1.10    1.40
   3  -3   0   -0.60    1.00
  -3   3   0   -2.80    1.10
  -3   3   0    1.00    1.40
  -3   3   0    1.70    2.30
  -3   3   0   -1.70    1.30
  -3   3   0   -0.40    1.40
  -3   3   0   -1.90    1.10
   2  -3   0 2438.86   65.79
  -2   3   0 2482.25   61.09
   1  -3   0 1560.14   43.00
  -1   3   0 1535.55   43.90
   0  -3   0 1491.05   42.70
   0   3   0 1505.55   42.80
  -1  -3   0    3.80    3.00
  -1  -3   0    2.50    1.50
  -1  -3   0    3.60    1.70
  -1  -3   0    0.80    0.80
  -1  -3   0    1.90    1.80
  -1  -3   0    1.60    1.10
  -1  -3   0    3.80    1.90
   1   3   0    3.60    2.00
   1   3   0    0.90    1.50
   1   3   0    2.50    2.60
   1   3   0    1.10    1.50
  -2  -3   0   50.29    2.80
  -2  -3   0   50.19    3.70
  -2  -3   0   47.40    1.40
  -2  -3   0   47.50    2.60
  -2  -3   0   51.79    4.10
  -2  -3   0   51.39    3.30
   2   3   0   50.59    2.70
   2   3   0   58.19    3.70
   2   3   0   46.70    3.70
   2   3   0   48.80    2.60
  -3  -3   0  372.76   10.90
  -3  -3   0  361.06    8.80
  -3  -3   0  365.86   10.10
  -3  -3   0  353.86    8.80
  -3  -3   0  369.16   11.60
   3   3   0  360.96   10.70
   3   3   0  360.26   10.50
   3   3   0  362.66    9.00
   3   3   0  361.96    8.90
   3   3   0  366.46    9.40
  -4  -3   0  163.38    7.60
  -4  -3   0  167.98    5.00
  -4  -3   0  170.48    7.50
  -4  -3   0  167.18    6.40
  -4  -3   0  161.08    5.10
   4   3   0  172.48    5.40
   4   3   0  167.68    7.20
   4   3   0  163.68    5.20
   4   3   0  161.38    7.10
   4   3   0  174.38    6.00
  -5  -3   0   55.29    3.10
  -5  -3   0   41.80    5.40
  -5  -3   0   46.70    5.50
  -5  -3   0   47.10    3.20
  -5  -3   0   48.30    4.40
   5   3   0   52.89    4.10
   5   3   0   53.89    3.50
   5   3   0   50.89    3.10
   5   3   0   53.09    5.60
   5   3   0   48.60    4.90
  -6  -3   0   91.89    3.90
  -6  -3   0   96.49    5.90
  -6  -3   0   94.39    7.00
  -6  -3   0   95.59    7.00
  -6  -3   0   86.69    3.90
   6   3   0   96.59    6.90
   6   3   0   96.09    5.40
   6   3   0   86.29    6.10
   6   3   0   93.49    4.40
   6   3   0   89.69    4.10
  -7  -3   0   76.49    6.90
  -7  -3   0   64.69    6.60
  -7  -3   0   74.89    3.40
  -7  -3   0   67.09    6.00
  -7  -3   0   69.59    5.70
   7   3   0   76.49    7.00
   7   3   0   76.29    5.20
   7   3   0   73.59    6.30
   7   3   0   75.19    3.90
  -8  -3   0   20.00    2.00
  -8  -3   0   21.30    4.20
  -8  -3   0   25.80    5.00
  -8  -3   0   18.40    2.10
   8   3   0   20.00    3.50
   8   3   0   21.10    2.70
   8   3   0   21.80    5.20
   8   3   0   19.10    3.30
   8   3   0   22.00    4.80
  -9  -3   0   16.40    1.70
  -9  -3   0   24.60    4.70
   9   3   0   17.20    5.40
   9   3   0   20.20    3.80
   9   3   0   24.30    4.80
   9   3   0   25.00    3.00
   9   3   0   17.00    2.80
 -10  -3   0   11.10    4.20
  10   3   0   14.50    2.70
  10   3   0   13.20    4.00
  10   3   0   12.00    3.60
  10   3   0   17.00    2.80
  10   3   0    9.70    5.20
  10   3   0   18.10    4.70
 -11  -3   0   12.60    4.60
  11   3   0   11.40    3.70
  11   3   0   12.50    2.90
  11   3   0    6.70    3.40
  11   3   0   10.40    4.10
  11   3   0    9.80    2.50
  11   3   0    9.50    5.80
  13  -4   0    2.10    1.30
  13  -4   0   13.40    5.40
  13  -4   0    1.80    1.40
  13  -4   0   -2.60    3.50
  12  -4   0    6.30    5.00
  12  -4   0    7.20    3.10
  12  -4   0   -2.60    3.50
  12  -4   0   -0.10    1.50
  12  -4   0   -2.60    3.20
  12  -4   0    2.90    4.00
 -12   4   0   -2.60    3.90
  11  -4   0    1.60    1.60
  11  -4   0    3.30    4.40
  11  -4   0   -2.20    3.40
  11  -4   0    4.20    3.10
  11  -4   0    0.90    4.40
  11  -4   0   -3.50    2.60
  11  -4   0    0.20    1.50
 -11   4   0   -1.40    3.40
  10  -4   0    8.90    1.80
  10  -4   0    6.10    3.80
  10  -4   0   16.70    5.10
  10  -4   0    4.70    3.90
  10  -4   0    7.90    3.40
  10  -4   0    3.90    3.20
  10  -4   0   12.10    2.00
 -10   4   0    4.40    4.00
   9  -4   0   33.10    5.80
   9  -4   0   32.40    2.70
   9  -4   0   29.20    4.10
   9  -4   0   30.20    2.50
   9  -4   0   26.20    3.90
  -9   4   0   18.90    5.10
   8  -4   0   21.60    4.80
   8  -4   0   25.70    2.30
   8  -4   0   21.90    3.40
   8  -4   0   27.00    4.30
   8  -4   0   25.80    4.70
   8  -4   0   23.30    2.20
  -8   4   0   22.60    4.30
   7  -4   0    1.30    2.90
   7  -4   0   -0.40    3.80
   7  -4   0   -0.60    1.80
   7  -4   0   -0.90    2.40
   7  -4   0    1.50    1.60
  -7   4   0   -2.00    2.90
   6  -4   0   51.49    2.70
   6  -4   0   47.40    5.20
   6  -4   0   55.69    3.30
   6  -4   0   48.00    4.30
   6  -4   0   56.69    3.90
  -6   4   0   50.89    3.60
  -6   4   0   53.99    2.10
  -6   4   0   52.79    4.60
   5  -4   0   51.59    2.50
   5  -4   0   51.79    3.30
   5  -4   0   53.09    2.50
   5  -4   0   44.80    4.50
   5  -4   0   42.50    4.10
  -5   4   0   49.60    3.20
  -5   4   0   47.90    4.20
  -5   4   0   48.90    2.30
  -5   4   0   48.10    2.20
  -5   4   0   49.70    3.40
   4  -4   0  133.39    4.00
   4  -4   0  130.19    4.60
   4  -4   0  136.49    6.00
   4  -4   0  132.79    6.00
   4  -4   0  135.09    4.10
  -4   4   0  138.59    5.40
  -4   4   0  139.09    4.00
  -4   4   0  134.09    6.00
  -4   4   0  135.39    4.00
  -4   4   0  139.79    5.40
   3  -4   0  302.47    9.40
   3  -4   0  310.87    8.50
   3  -4   0  299.07    7.60
   3  -4   0  303.67    9.00
   3  -4   0  305.47    7.50
  -3   4   0  305.47    8.40
  -3   4   0  316.17    9.10
  -3   4   0  311.17    9.40
  -3   4   0  306.77    7.40
  -3   4   0  304.67    7.40
  -3   4   0  303.97    8.40
   2  -4   0  655.43   14.80
   2  -4   0  668.83   15.90
   2  -4   0  676.23   16.80
   2  -4   0  663.13   14.90
   2  -4   0  654.33   14.70
  -2   4   0  697.63   16.90
  -2   4   0  673.33   16.00
  -2   4   0  679.53   14.80
  -2   4   0  620.54   14.70
  -2   4   0  669.13   14.80
   1  -4   0  176.38    5.10
   1  -4   0  170.98    5.20
   1  -4   0  171.18    4.80
   1  -4   0  177.98    6.80
   1  -4   0  170.18    5.90
  -1   4   0  174.08    5.90
  -1   4   0  174.58    5.10
  -1   4   0  176.08    6.70
  -1   4   0  176.28    4.80
  -1   4   0  168.98    5.10
   0  -4   0  170.28    7.10
   0  -4   0  173.98    5.40
   0  -4   0  174.68    5.90
   0  -4   0  175.28    5.00
   0  -4   0  173.18    5.60
   0  -4   0  184.68    5.30
   0   4   0  173.48    6.80
   0   4   0  169.68    5.00
   0   4   0  171.08    5.00
   0   4   0  177.08    5.30
   0   4   0  168.58    5.60
  -1  -4   0   -0.20    2.70
  -1  -4   0   -1.30    1.50
  -1  -4   0   -0.30    1.60
  -1  -4   0   -0.40    1.40
  -1  -4   0    0.70    1.50
  -1  -4   0    2.30    2.00
   1   4   0    0.30    1.10
   1   4   0    0.80    1.90
   1   4   0    1.50    1.50
   1   4   0   -0.40    2.40
   1   4   0    0.90    1.50
  -2  -4   0  311.57    8.10
  -2  -4   0  274.67    8.10
  -2  -4   0  334.17    9.90
  -2  -4   0  336.07   10.70
  -2  -4   0  335.17    8.60
   2   4   0  328.57    8.60
   2   4   0  323.57    8.40
   2   4   0  325.07   10.30
   2   4   0  328.67    9.50
   2   4   0  337.17    8.40
  -3  -4   0   14.10    2.30
  -3  -4   0   15.50    2.80
  -3  -4   0   15.00    2.10
  -3  -4   0   12.50    3.20
  -3  -4   0   16.00    2.10
  -3  -4   0   21.00    4.20
   3   4   0   14.60    2.20
   3   4   0   18.20    2.90
   3   4   0   16.80    2.20
   3   4   0   13.70    2.10
   3   4   0   17.30    3.60
  -4  -4   0   37.60    5.10
  -4  -4   0   33.60    2.90
  -4  -4   0   35.90    2.90
  -4  -4   0   37.20    4.00
  -4  -4   0   36.70    5.50
   4   4   0   40.10    3.80
   4   4   0   39.10    5.10
   4   4   0   34.20    3.10
   4   4   0   41.90    4.80
   4   4   0   42.40    3.20
  -5  -4   0    3.10    3.00
  -5  -4   0    6.50    3.90
  -5  -4   0    7.40    2.20
  -5  -4   0    9.10    2.20
  -5  -4   0    4.10    4.40
   5   4   0   10.10    4.10
   5   4   0    7.60    2.80
   5   4   0    5.50    3.60
   5   4   0    9.40    2.50
   5   4   0    9.00    2.20
  -6  -4   0   35.10    5.40
  -6  -4   0   30.00    2.90
  -6  -4   0   33.60    5.80
  -6  -4   0   25.50    2.70
  -6  -4   0   30.70    4.40
   6   4   0   33.40    5.30
   6   4   0   37.70    5.40
   6   4   0   32.20    3.30
   6   4   0   25.40    2.90
   6   4   0   28.60    3.60
  -7  -4   0   78.19    4.10
  -7  -4   0   85.19    7.40
  -7  -4   0   84.99    7.50
  -7  -4   0   88.99    6.50
   7   4   0   79.29    5.40
   7   4   0   85.39    4.40
   7   4   0   82.59    4.60
   7   4   0   67.69    6.20
   7   4   0   81.09    7.10
  -8  -4   0   17.90    5.20
  -8  -4   0   10.30    2.10
  -8  -4   0   11.90    3.90
  -8  -4   0   11.50    2.00
  -8  -4   0    7.70    4.30
   8   4   0   13.50    2.70
   8   4   0    8.10    3.30
   8   4   0   12.40    2.70
   8   4   0   10.70    4.50
   8   4   0   12.50    4.50
  -9  -4   0   16.70    5.00
  -9  -4   0   10.00    1.90
   9   4   0    7.20    5.00
   9   4   0   11.50    4.40
   9   4   0   12.80    2.70
   9   4   0    7.00    2.60
   9   4   0    8.00    3.50
 -10  -4   0   11.80    4.30
  10   4   0    4.40    3.10
  10   4   0    8.90    5.50
  10   4   0    2.40    2.40
  10   4   0   -1.30    4.80
  10   4   0    9.60    3.80
  13  -5   0   -1.40    1.50
  13  -5   0    9.10    4.80
  13  -5   0    3.30    3.30
  13  -5   0    0.30    1.40
  13  -5   0    0.20    3.70
  12  -5   0    3.20    3.20
  12  -5   0    4.60    3.50
  12  -5   0    3.10    4.40
  12  -5   0    3.00    4.30
  12  -5   0   -1.50    1.60
  12  -5   0    1.00    3.80
 -12   5   0   -2.80    3.80
  11  -5   0    0.40    2.90
  11  -5   0    1.20    1.60
  11  -5   0   -3.00    1.60
  11  -5   0   -2.30    4.20
  11  -5   0    3.30    3.80
  11  -5   0   -3.50    2.90
  11  -5   0    4.40    4.50
 -11   5   0   -1.00    3.60
  10  -5   0    3.60    1.90
  10  -5   0   -0.50    4.10
  10  -5   0   -0.50    2.80
  10  -5   0    3.30    3.90
  10  -5   0    2.50    3.20
  10  -5   0    0.70    1.60
 -10   5   0   -0.90    3.70
   9  -5   0    6.20    1.70
   9  -5   0    7.90    3.10
   9  -5   0    4.90    4.30
   9  -5   0   -6.90    6.50
   9  -5   0    8.40    3.60
  -9   5   0    4.80    4.40
   8  -5   0   25.00    2.40
   8  -5   0   26.60    4.60
   8  -5   0   29.10    4.60
   8  -5   0   27.40    2.90
   8  -5   0   30.30    3.80
  -8   5   0   21.90    4.30
   7  -5   0  106.19    4.20
   7  -5   0  108.99    5.30
   7  -5   0  100.59    6.40
   7  -5   0  104.59    4.00
   7  -5   0   97.69    6.20
  -7   5   0  104.79    3.10
  -7   5   0   97.19    5.10
  -7   5   0   96.99    6.30
   6  -5   0   60.89    3.20
   6  -5   0   59.09    5.70
   6  -5   0   60.29    3.10
   6  -5   0   59.39    4.20
   6  -5   0   58.69    4.90
  -6   5   0   59.29    2.70
  -6   5   0   55.69    4.80
  -6   5   0   59.59    3.90
  -6   5   0   61.19    5.50
  -6   5   0   62.49    2.90
   5  -5   0  115.19    4.00
   5  -5   0  110.09    3.90
   5  -5   0  117.99    6.00
   5  -5   0  115.29    4.70
   5  -5   0  117.69    6.30
  -5   5   0  109.59    3.80
  -5   5   0  117.29    4.60
  -5   5   0  110.09    6.10
  -5   5   0  114.99    3.90
  -5   5   0  116.69    5.60
   4  -5   0   53.89    2.90
   4  -5   0   59.29    4.40
   4  -5   0   52.49    2.80
   4  -5   0   56.49    3.30
   4  -5   0   52.09    4.60
  -4   5   0   57.49    2.70
  -4   5   0   57.69    4.40
  -4   5   0   52.89    2.70
  -4   5   0   53.89    3.20
  -4   5   0   58.09    4.60
  -4   5   0   61.39    4.00
   3  -5   0  341.37   10.80
   3  -5   0  346.97    8.70
   3  -5   0  353.76    8.70
   3  -5   0  335.27    8.60
   3  -5   0  350.16   10.20
  -3   5   0  344.57    8.60
  -3   5   0  356.16   10.90
  -3   5   0  341.57    8.90
  -3   5   0  345.27   10.10
   2  -5   0   53.89    2.60
   2  -5   0   49.99    3.00
   2  -5   0   49.99    3.30
   2  -5   0   50.39    3.00
   2  -5   0   48.40    4.40
  -2   5   0   50.29    2.60
  -2   5   0   56.39    2.90
  -2   5   0   51.09    3.60
  -2   5   0   49.60    2.50
  -2   5   0   48.40    4.30
   1  -5   0  290.37    7.30
   1  -5   0  280.77    8.30
   1  -5   0  284.07    8.30
   1  -5   0  288.07    9.60
   1  -5   0  287.57    7.70
  -1   5   0  290.67    8.50
  -1   5   0  287.67    7.60
  -1   5   0  278.17    8.30
  -1   5   0  279.47    7.30
  -1   5   0  287.87    9.50
   0  -5   0    4.80    1.80
   0  -5   0    4.60    2.10
   0  -5   0    2.80    2.10
   0  -5   0    0.90    1.70
   0  -5   0    4.20    3.10
   0  -5   0    1.40    1.40
   0   5   0    1.60    1.40
   0   5   0    0.60    2.90
   0   5   0    3.20    1.80
   0   5   0    2.30    1.40
   0   5   0    1.70    2.10
  -1  -5   0  151.18    5.00
  -1  -5   0  145.39    5.30
  -1  -5   0  142.09    6.80
  -1  -5   0  137.09    4.70
  -1  -5   0  144.59    6.00
  -1  -5   0  145.69    5.00
   1   5   0  145.39    4.90
   1   5   0  134.29    4.70
   1   5   0  139.99    4.70
   1   5   0  138.79    5.80
   1   5   0  138.59    6.70
  -2  -5   0   22.70    2.50
  -2  -5   0   14.90    1.50
  -2  -5   0   22.90    2.50
  -2  -5   0   21.50    3.50
  -2  -5   0   28.50    4.60
  -2  -5   0   19.60    2.90
  -2  -5   0   23.10    2.50
   2   5   0   20.80    2.50
   2   5   0   21.40    2.60
   2   5   0   18.50    3.90
   2   5   0   22.30    3.10
   2   5   0   21.10    2.20
  -3  -5   0   31.80    4.40
  -3  -5   0   38.90    5.60
  -3  -5   0   29.40    3.10
  -3  -5   0   28.70    2.80
  -3  -5   0   34.00    3.80
   3   5   0   30.50    4.90
   3   5   0   29.70    2.90
   3   5   0   35.90    4.40
   3   5   0   30.50    3.00
   3   5   0   38.20    3.60
  -4  -5   0   50.99    3.50
  -4  -5   0   45.10    4.70
  -4  -5   0   40.80    5.50
  -4  -5   0   49.10    3.50
  -4  -5   0   45.40    6.10
   4   5   0   47.60    3.50
   4   5   0   40.60    5.50
   4   5   0   44.60    3.70
   4   5   0   48.50    3.80
   4   5   0   53.19    5.30
  -5  -5   0   11.40    2.40
  -5  -5   0    6.80    4.20
  -5  -5   0   14.50    2.60
  -5  -5   0    7.30    3.40
  -5  -5   0   10.70    5.10
   5   5   0   11.60    4.40
   5   5   0    7.90    2.40
   5   5   0   10.70    2.60
   5   5   0   10.10    2.60
   5   5   0   11.20    4.00
  -6  -5   0   -1.80    3.00
  -6  -5   0    1.90    2.20
  -6  -5   0   -2.40    4.50
  -6  -5   0   -6.40    3.50
   6   5   0    1.50    2.30
   6   5   0    5.20    3.90
   6   5   0    3.70    4.10
   6   5   0   -2.20    3.30
   6   5   0   -0.40    2.40
  -7  -5   0   11.10    5.30
  -7  -5   0    9.80    2.20
  -7  -5   0    4.00    3.40
  -7  -5   0    8.50    2.40
  -7  -5   0    9.80    4.40
   7   5   0    8.90    4.40
   7   5   0    6.60    4.30
   7   5   0    7.40    3.10
   7   5   0    9.30    2.40
   7   5   0   12.30    2.60
  -8  -5   0    3.60    2.00
  -8  -5   0    6.00    2.20
  -8  -5   0    6.40    4.00
  -8  -5   0   12.80    5.00
   8   5   0    3.40    3.30
   8   5   0   -1.70    4.10
   8   5   0    8.30    4.30
  -9  -5   0    6.70    2.00
  -9  -5   0   12.20    4.30
  -9  -5   0   20.10    5.20
  -9  -5   0   12.20    3.30
   9   5   0    0.70    4.30
   9   5   0   10.40    3.60
   9   5   0    8.90    2.50
   9   5   0    8.60    2.80
   9   5   0   14.50    4.90
 -10  -5   0    2.00    4.10
 -10  -5   0    3.30    1.30
 -10  -5   0    2.20    1.50
  10   5   0   12.20    4.50
  10   5   0    4.90    2.70
  10   5   0    6.10    3.60
  10   5   0   -7.00    5.00
  10   5   0    5.40    2.80
  13  -6   0    3.00    1.60
  13  -6   0    8.80    5.00
  13  -6   0    1.60    3.80
  12  -6   0    6.30    4.30
  12  -6   0    8.00    3.50
  12  -6   0    5.00    4.70
  12  -6   0    2.00    5.70
  12  -6   0    6.20    1.80
  12  -6   0    0.00    1.90
  12  -6   0    9.40    3.50
 -12   6   0    2.00    3.80
  11  -6   0    0.90    4.40
  11  -6   0    1.40    1.70
  11  -6   0    1.00    3.00
  11  -6   0    5.70    2.00
  11  -6   0    7.60    4.40
  11  -6   0    8.70    3.70
 -11   6   0   -0.50    4.00
  10  -6   0    1.40    4.20
  10  -6   0    0.30    3.10
  10  -6   0   -1.30    1.70
  10  -6   0   -1.30    3.90
  10  -6   0   -0.10    1.90
  10  -6   0   -2.70    2.70
 -10   6   0   -8.80    3.20
   9  -6   0    6.10    2.00
   9  -6   0    5.70    2.80
   9  -6   0    6.80    2.10
   9  -6   0    9.40    3.70
   9  -6   0   10.70    4.00
  -9   6   0    4.10    3.60
   8  -6   0    8.20    2.20
   8  -6   0   11.00    4.40
   8  -6   0   11.60    3.10
   8  -6   0    8.80    2.20
   8  -6   0   10.60    4.10
  -8   6   0    7.20    3.90
  -8   6   0    8.00    1.20
   7  -6   0   -2.80    3.40
   7  -6   0    0.20    1.80
   7  -6   0   -1.80    1.90
   7  -6   0   -0.80    2.90
   7  -6   0   -1.70    2.40
  -7   6   0    1.80    3.80
  -7   6   0   -1.70    1.30
  -7   6   0   -4.50    2.80
  -7   6   0    0.00    2.40
  -7   6   0   -2.00    1.60
   6  -6   0   99.19    4.10
   6  -6   0   99.89    4.10
   6  -6   0   98.89    6.60
   6  -6   0  104.29    5.00
   6  -6   0  108.49    6.80
  -6   6   0   92.49    6.50
  -6   6   0  102.29    3.80
  -6   6   0   95.29    5.90
  -6   6   0  106.49    4.90
   5  -6   0   31.30    2.90
   5  -6   0   35.50    4.80
   5  -6   0   35.70    3.30
   5  -6   0   35.80    2.90
   5  -6   0   39.40    4.70
  -5   6   0   36.70    2.90
  -5   6   0   32.60    4.10
  -5   6   0   33.10    3.20
  -5   6   0   35.70    4.80
  -5   6   0   33.50    2.60
   4  -6   0  202.38    6.20
   4  -6   0  201.48    6.10
   4  -6   0  202.68    8.00
   4  -6   0  203.18    6.30
   4  -6   0  208.58    8.50
  -4   6   0  200.58    6.00
  -4   6   0  204.78    8.40
  -4   6   0  216.58    7.50
  -4   6   0  210.28    6.30
  -4   6   0  205.18    6.10
  -4   6   0  196.48    7.50
   3  -6   0    2.40    1.40
   3  -6   0   -0.10    1.30
   3  -6   0   -0.10    1.90
   3  -6   0    1.00    3.00
   3  -6   0    3.10    1.50
  -3   6   0    0.80    1.70
  -3   6   0    0.80    1.80
  -3   6   0    1.20    3.10
  -3   6   0    2.80    1.50
  -3   6   0    3.90    2.50
   2  -6   0   59.19    5.10
   2  -6   0   68.09    3.20
   2  -6   0   59.29    3.10
   2  -6   0   63.29    4.50
   2  -6   0   64.69    3.60
  -2   6   0   68.69    3.60
  -2   6   0   66.39    4.40
  -2   6   0   61.49    5.10
  -2   6   0   60.19    3.10
  -2   6   0   62.59    3.10
   1  -6   0  510.65   12.20
   1  -6   0  509.15   12.40
   1  -6   0  514.45   13.70
   1  -6   0  500.55   12.40
   1  -6   0  511.85   15.10
  -1   6   0  515.45   15.10
  -1   6   0  516.55   12.20
  -1   6   0  519.55   12.50
  -1   6   0  514.35   13.70
  -1   6   0  514.55   12.50
   0  -6   0   42.30    3.30
   0  -6   0   36.50    4.00
   0  -6   0   42.60    3.40
   0  -6   0   43.10    2.80
   0  -6   0   34.70    2.90
   0  -6   0   43.50    5.00
   0   6   0   36.70    3.30
   0   6   0   38.50    3.70
   0   6   0   38.10    2.80
   0   6   0   40.40    4.90
  -1  -6   0  120.19    4.70
  -1  -6   0  110.49    5.90
  -1  -6   0  114.09    3.90
  -1  -6   0  117.09    7.00
  -1  -6   0  123.39    4.60
  -1  -6   0  117.49    4.90
  -1  -6   0  124.19    5.30
   1   6   0  115.59    6.90
   1   6   0  111.89    4.90
   1   6   0  117.09    5.80
   1   6   0  112.89    5.00
   1   6   0  111.69    4.70
  -2  -6   0   13.70    1.70
  -2  -6   0   15.60    3.10
  -2  -6   0    9.70    2.20
  -2  -6   0    7.00    2.40
  -2  -6   0   13.70    4.90
  -2  -6   0    8.20    2.50
  -2  -6   0   16.10    3.80
   2   6   0   11.70    2.20
   2   6   0   10.00    2.50
   2   6   0    6.30    2.50
   2   6   0   11.30    4.40
   2   6   0   13.60    3.30
  -3  -6   0    4.70    0.60
  -3  -6   0    6.00    2.40
  -3  -6   0    6.40    3.90
  -3  -6   0    4.60    4.90
  -3  -6   0    1.10    2.50
  -3  -6   0    2.40    3.00
  -3  -6   0    9.50    2.00
   3   6   0    7.40    2.10
   3   6   0    3.80    4.40
   3   6   0    7.70    3.40
   3   6   0    3.50    2.50
   3   6   0    5.60    2.00
  -4  -6   0    5.20    2.40
  -4  -6   0    6.00    2.40
  -4  -6   0   11.10    5.30
  -4  -6   0    4.00    3.40
  -4  -6   0    7.40    4.10
   4   6   0    8.10    2.70
   4   6   0    8.80    3.70
   4   6   0    6.00    4.50
   4   6   0    4.70    2.60
   4   6   0    8.80    2.90
  -5  -6   0   -2.70    2.20
  -5  -6   0   -1.60    3.20
  -5  -6   0    1.90    4.70
  -5  -6   0   -2.20    2.70
  -5  -6   0   -0.10    4.10
   5   6   0   -0.20    2.40
   5   6   0   -3.70    2.40
   5   6   0    3.40    3.60
   5   6   0   -5.30    3.90
   5   6   0   -0.90    2.70
  -6  -6   0   -0.20    2.30
  -6  -6   0    0.00    3.10
  -6  -6   0   -2.40    4.70
  -6  -6   0   -5.20    3.40
   6   6   0    1.50    2.40
   6   6   0    2.30    4.30
   6   6   0   -5.00    2.60
   6   6   0    0.90    2.40
   6   6   0    1.10    3.70
  -7  -6   0   -1.00    4.60
  -7  -6   0    3.60    3.40
  -7  -6   0    4.20    2.40
  -7  -6   0    2.20    2.30
  -7  -6   0    2.00    4.10
   7   6   0    0.30    3.90
   7   6   0    0.50    2.30
   7   6   0   -0.10    2.90
   7   6   0   -1.10    3.90
   7   6   0   -1.30    2.40
  -8  -6   0    5.90    8.40
  -8  -6   0    1.20    2.00
  -8  -6   0   -0.30    3.80
  -8  -6   0    9.10    4.00
  -8  -6   0    6.80    2.40
   8   6   0   -1.70    4.30
   8   6   0    1.70    4.10
   8   6   0    3.50    2.80
   8   6   0   -0.10    3.00
  -9  -6   0   10.80    4.60
  -9  -6   0   -1.90    3.60
  -9  -6   0    8.80    5.30
  -9  -6   0    2.50    3.30
  -9  -6   0    2.60    2.30
   9   6   0   -8.60    4.60
   9   6   0    7.10    4.10
   9   6   0   -0.90    3.10
   9   6   0    0.30    4.30
   9   6   0    1.50    2.70
  12  -7   0   14.40    3.90
  12  -7   0   11.30    2.20
  12  -7   0   10.90    5.40
  12  -7   0    4.50    5.70
  12  -7   0    2.00    3.50
  12  -7   0    6.30    2.40
 -12   7   0    3.00    4.50
  11  -7   0   11.30    5.10
  11  -7   0   15.80    3.70
  11  -7   0   13.40    2.60
  11  -7   0   17.00    2.40
  11  -7   0   23.60    5.70
  11  -7   0   21.40    4.60
 -11   7   0   11.80    4.60
  10  -7   0    1.20    2.80
  10  -7   0    1.70    2.10
  10  -7   0    5.60    2.00
  10  -7   0   -0.70    3.40
  10  -7   0    4.50    3.70
 -10   7   0   -1.40    3.90
   9  -7   0    9.10    4.60
   9  -7   0    7.50    2.30
   9  -7   0   10.30    4.10
   9  -7   0    8.00    3.20
   9  -7   0   12.00    2.40
  -9   7   0    6.20    1.10
  -9   7   0    7.70    5.30
   8  -7   0    1.50    2.10
   8  -7   0    4.20    2.20
   8  -7   0    1.00    2.70
   8  -7   0    0.50    4.20
   8  -7   0    2.70    3.80
  -8   7   0   -0.90    3.50
  -8   7   0    0.60    2.60
  -8   7   0    4.30    1.80
  -8   7   0    6.90    4.40
  -8   7   0   -0.20    2.40
   7  -7   0   12.50    3.70
   7  -7   0   12.80    2.90
   7  -7   0   10.70    4.40
   7  -7   0   12.10    2.60
   7  -7   0    9.90    2.50
  -7   7   0   14.20    4.80
  -7   7   0    8.20    3.30
  -7   7   0   10.50    2.10
  -7   7   0   12.70    2.00
  -7   7   0   13.30    2.80
   6  -7   0    4.20    2.40
   6  -7   0    1.30    2.10
   6  -7   0   -0.70    3.70
   6  -7   0    1.60    2.90
   6  -7   0    2.60    2.00
  -6   7   0   -1.50    3.80
  -6   7   0   -2.70    3.10
  -6   7   0    2.90    1.90
  -6   7   0   -0.10    1.90
  -6   7   0    0.30    2.20
   5  -7   0    4.50    2.30
   5  -7   0   -4.40    3.60
   5  -7   0    2.70    2.10
   5  -7   0    2.90    2.00
   5  -7   0   -0.70    3.50
  -5   7   0   -1.10    2.40
  -5   7   0    7.30    3.60
  -5   7   0    3.80    2.00
  -5   7   0   -1.10    2.00
  -5   7   0    3.70    2.10
  -5   7   0    3.80    4.10
   4  -7   0   12.90    2.00
   4  -7   0   13.90    3.00
   4  -7   0   15.60    4.50
   4  -7   0   11.50    1.90
   4  -7   0   13.20    2.30
  -4   7   0   13.10    4.50
  -4   7   0   10.70    3.50
  -4   7   0   17.10    2.30
  -4   7   0   13.50    2.40
   3  -7   0   25.80    3.50
   3  -7   0   22.90    2.50
   3  -7   0   20.60    2.30
   3  -7   0   22.70    2.50
   3  -7   0   21.50    4.10
  -3   7   0   24.80    3.60
  -3   7   0   23.00    2.80
  -3   7   0   26.90    2.70
  -3   7   0   21.30    2.70
  -3   7   0   31.50    4.90
   2  -7   0  252.07    7.60
   2  -7   0  245.78    7.10
   2  -7   0  244.18   10.10
   2  -7   0  236.98    8.80
   2  -7   0  256.57    7.50
  -2   7   0  231.58    7.20
  -2   7   0  241.38    8.70
  -2   7   0  244.08    7.50
  -2   7   0  252.47   10.20
  -2   7   0  244.58    7.10
   1  -7   0    7.30    2.60
   1  -7   0   14.80    2.60
   1  -7   0   15.80    4.70
   1  -7   0    9.90    2.10
   1  -7   0   11.10    2.10
   1  -7   0   14.60    2.90
  -1   7   0    8.00    3.10
  -1   7   0   12.80    3.10
  -1   7   0   10.30    4.00
  -1   7   0   11.30    2.10
  -1   7   0   13.40    2.20
   0  -7   0  285.57   10.00
   0  -7   0  300.27    8.60
   0  -7   0  316.87    9.20
   0  -7   0  304.87    9.40
   0  -7   0  287.77   11.50
   0  -7   0  301.37    8.50
   0   7   0  287.77    8.60
   0   7   0  301.97   10.00
   0   7   0  308.77    8.50
   0   7   0  304.07    8.90
   0   7   0  305.77   11.70
  -1  -7   0   77.19    4.00
  -1  -7   0   75.49    3.50
  -1  -7   0   77.39    5.80
  -1  -7   0   78.69    4.10
  -1  -7   0   83.99    7.00
  -1  -7   0   71.49    4.80
  -1  -7   0   70.59    4.20
   1   7   0   65.99    6.50
   1   7   0   77.39    7.50
   1   7   0   76.29    4.30
   1   7   0   76.59    4.70
   1   7   0   66.69    5.30
  -2  -7   0   10.80    4.10
  -2  -7   0    5.90    1.70
  -2  -7   0   10.90    2.30
  -2  -7   0   10.70    3.40
  -2  -7   0   14.90    5.10
  -2  -7   0    8.20    2.70
  -2  -7   0   12.60    2.90
   2   7   0   12.30    2.40
   2   7   0    8.80    2.90
   2   7   0    6.00    4.60
   2   7   0    5.20    2.60
   2   7   0   14.00    3.50
  -3  -7   0   28.30    3.60
  -3  -7   0   29.00    4.90
  -3  -7   0   26.50    2.90
  -3  -7   0   29.20    4.40
  -3  -7   0   35.50    6.50
  -3  -7   0   29.60    3.10
   3   7   0   33.50    5.90
   3   7   0   29.90    3.60
   3   7   0   28.50    3.50
   3   7   0   26.90    3.40
   3   7   0   34.60    4.60
  -4  -7   0    8.00    3.60
  -4  -7   0    8.90    2.70
  -4  -7   0    9.00    4.30
  -4  -7   0    5.60    5.50
   4   7   0    7.20    4.70
   4   7   0    4.30    2.80
   4   7   0    3.20    2.80
   4   7   0    5.10    3.50
   4   7   0    5.20    2.90
  -5  -7   0   28.50    6.70
  -5  -7   0   18.90    3.00
  -5  -7   0   21.50    4.40
  -5  -7   0   23.70    5.40
  -5  -7   0   22.90    3.20
   5   7   0   27.00    4.20
   5   7   0   22.10    4.60
   5   7   0   21.10    3.40
   5   7   0   30.80    6.00
   5   7   0   21.40    3.70
  -6  -7   0    7.90    5.80
  -6  -7   0    8.90    2.50
  -6  -7   0   10.10    3.70
  -6  -7   0    6.20    2.80
  -6  -7   0    3.00    4.30
   6   7   0    2.40    3.90
   6   7   0    5.60    4.80
   6   7   0    4.60    2.70
   6   7   0    8.40    2.90
   6   7   0    4.90    2.80
  -7  -7   0    1.90    3.80
  -7  -7   0   -2.00    3.70
  -7  -7   0    3.20    2.50
  -7  -7   0    0.40    2.30
  -7  -7   0   -1.70    4.70
   7   7   0   -4.90    4.00
   7   7   0   -0.90    2.90
   7   7   0   -0.80    3.00
   7   7   0    5.50    2.80
   7   7   0    8.70    4.50
  -8  -7   0   -0.50    2.20
  -8  -7   0    0.50    3.70
  -8  -7   0    5.20    5.30
  -8  -7   0   -0.10    2.30
  -8  -7   0    4.20    4.20
   8   7   0    2.00    2.60
   8   7   0   -9.10    4.30
   8   7   0    6.60    4.40
   8   7   0    5.00    4.30
   8   7   0    0.00    2.60
  12  -8   0    9.60    5.30
  12  -8   0   23.70    9.50
  12  -8   0   17.20    4.40
  12  -8   0    9.50    2.30
  12  -8   0   12.60    3.90
 -12   8   0    5.30    4.40
  11  -8   0   13.50    3.50
  11  -8   0   11.60    2.60
  11  -8   0   13.80    4.30
  11  -8   0   19.20    5.30
  11  -8   0   15.70    2.60
 -11   8   0    6.20    4.40
  10  -8   0   21.20    5.40
  10  -8   0   19.30    4.80
  10  -8   0   20.10    2.80
  10  -8   0   16.00    2.70
  10  -8   0   16.10    3.40
 -10   8   0    8.20    4.30
   9  -8   0    8.70    4.30
   9  -8   0   11.80    3.80
   9  -8   0   12.30    4.60
   9  -8   0   10.40    2.60
   9  -8   0    8.80    2.40
  -9   8   0    7.80    1.70
  -9   8   0   12.60    4.80
  -9   8   0    7.70    3.90
  -9   8   0    8.20    3.00
  -9   8   0    7.40    1.50
   8  -8   0   32.10    5.60
   8  -8   0   31.20    3.30
   8  -8   0   29.90    3.70
   8  -8   0   27.40    5.10
   8  -8   0   28.10    3.20
  -8   8   0   19.90    3.80
  -8   8   0   18.20    2.20
  -8   8   0   27.90    5.70
  -8   8   0   30.50    3.00
  -8   8   0   26.10    3.50
   7  -8   0   22.80    3.10
   7  -8   0   24.60    3.30
   7  -8   0   17.50    2.70
   7  -8   0   14.70    5.50
   7  -8   0   19.00    5.00
  -7   8   0   13.40    4.00
  -7   8   0   17.70    2.80
  -7   8   0   21.80    5.40
  -7   8   0   22.10    2.70
  -7   8   0   20.40    3.20
   6  -8   0    9.10    3.50
   6  -8   0   11.20    2.60
   6  -8   0   10.30    2.70
   6  -8   0    9.30    2.90
   6  -8   0    5.40    4.70
  -6   8   0   18.60    2.60
  -6   8   0   12.70    2.70
  -6   8   0   14.40    5.00
  -6   8   0   12.80    2.60
   5  -8   0   37.10    5.60
   5  -8   0   38.90    3.70
   5  -8   0   46.30    3.80
   5  -8   0   37.50    3.50
   5  -8   0   34.70    5.20
  -5   8   0   39.80    5.10
  -5   8   0   36.50    5.50
  -5   8   0   38.40    3.50
  -5   8   0   44.40    3.60
  -5   8   0   45.50    3.90
   4  -8   0    3.50    2.10
   4  -8   0    1.20    1.70
   4  -8   0    0.40    4.20
   4  -8   0    1.40    1.90
   4  -8   0    2.70    3.30
  -4   8   0   -2.40    2.80
  -4   8   0    0.80    4.00
  -4   8   0    3.50    2.10
  -4   8   0   -0.80    2.20
  -4   8   0   -1.90    2.20
   3  -8   0   75.59    6.00
   3  -8   0   71.79    4.50
   3  -8   0   67.69    5.90
   3  -8   0   77.29    4.10
   3  -8   0   78.49    4.10
  -3   8   0   79.49    4.60
  -3   8   0   74.79    5.60
  -3   8   0   74.29    4.10
  -3   8   0   68.99    4.40
  -3   8   0   64.19    6.60
   2  -8   0    5.60    2.80
   2  -8   0    7.90    2.70
   2  -8   0    3.10    4.50
   2  -8   0    3.80    2.10
   2  -8   0    5.50    2.20
  -2   8   0    5.30    2.70
  -2   8   0    1.90    3.90
  -2   8   0    6.40    2.10
  -2   8   0    9.80    2.80
  -2   8   0    6.60    2.60
   1  -8   0    3.80    2.20
   1  -8   0    2.40    2.80
   1  -8   0    6.70    2.80
   1  -8   0    3.20    2.60
   1  -8   0    8.50    4.70
   1  -8   0    4.60    3.40
  -1   8   0    4.90    2.90
  -1   8   0    2.10    4.50
  -1   8   0    4.30    2.10
  -1   8   0    3.70    2.10
  -1   8   0    2.50    2.40
   0  -8   0    0.10    2.00
   0  -8   0    2.50    2.70
   0  -8   0   -0.70    4.60
   0  -8   0    3.50    3.40
   0  -8   0    0.70    2.10
   0   8   0    7.40    3.30
   0   8   0    0.70    2.20
   0   8   0   -4.80    4.20
   0   8   0   -1.60    2.60
   0   8   0   -2.20    1.90
  -1  -8   0    3.50    3.10
  -1  -8   0    0.30    1.80
  -1  -8   0   -2.80    2.20
  -1  -8   0    4.60    5.30
  -1  -8   0    0.70    3.40
  -1  -8   0    4.30    3.40
  -1  -8   0    0.50    2.80
   1   8   0   -2.20    3.00
   1   8   0    3.50    2.80
   1   8   0   -3.90    1.90
   1   8   0   -0.80    3.50
   1   8   0    1.50    2.10
  -2  -8   0   34.40    3.80
  -2  -8   0   34.50    7.10
  -2  -8   0   23.70    2.70
  -2  -8   0   28.20    5.10
  -2  -8   0   30.90    3.70
  -2  -8   0   29.90    3.50
  -2  -8   0   23.30    4.20
   2   8   0   26.40    3.40
   2   8   0   22.60    3.10
   2   8   0   31.50    4.50
   2   8   0   33.00    6.40
   2   8   0   22.60    4.30
  -3  -8   0   13.60    3.20
  -3  -8   0   18.60    3.30
  -3  -8   0   12.70    3.90
  -3  -8   0   11.30    2.90
  -3  -8   0   24.70    6.60
  -3  -8   0   12.30    4.50
   3   8   0   10.70    3.80
   3   8   0   18.60    3.40
   3   8   0    9.40    3.20
   3   8   0   15.00    3.00
   3   8   0   13.00    4.80
  -4  -8   0   19.90    6.50
  -4  -8   0   21.90    3.30
  -4  -8   0   18.70    5.20
  -4  -8   0   18.80    4.20
   4   8   0   21.80    4.60
   4   8   0   21.10    3.50
   4   8   0   22.40    3.60
   4   8   0   18.30    3.50
   4   8   0   15.50    8.90
  -5  -8   0   17.50    3.10
  -5  -8   0   14.10    4.00
  -5  -8   0   23.60    8.20
  -5  -8   0   17.50    5.10
  -5  -8   0   15.10    3.10
   5   8   0   11.00    2.70
   5   8   0   20.30    5.60
   5   8   0   17.90    4.50
   5   8   0   17.20    3.40
   5   8   0   14.50    3.60
  -6  -8   0    4.30    2.60
  -6  -8   0    4.80    4.00
  -6  -8   0    5.80    2.60
  -6  -8   0    4.70    5.60
  -6  -8   0    5.50    4.20
   6   8   0   -2.60    3.80
   6   8   0    5.30    3.00
   6   8   0    3.90    2.90
   6   8   0   12.20    4.90
   6   8   0    8.50    3.00
  -7  -8   0    4.20    2.40
  -7  -8   0    5.10    4.30
  -7  -8   0    2.70    6.90
  -7  -8   0    8.30    6.00
   7   8   0    0.10    4.40
   7   8   0   11.10    4.80
   7   8   0    3.10    2.70
   7   8   0    5.10    2.90
   7   8   0   -0.20    3.30
  -8  -8   0    8.30    5.80
  -8  -8   0   15.00    4.90
  -8  -8   0    6.90    4.00
  -8  -8   0    4.70    2.80
  -8  -8   0    8.80    4.50
   8   8   0    4.10    2.90
   8   8   0    2.30    3.70
   8   8   0   12.50    4.60
   8   8   0   -2.60    4.70
   8   8   0    3.00    2.90
  12  -9   0    7.10    5.30
  12  -9   0    6.70    2.70
  12  -9   0   22.10    5.60
  12  -9   0   13.00    2.70
  12  -9   0    7.40    3.70
  12  -9   0   12.60    4.50
 -12   9   0    1.90    4.00
  11  -9   0   15.70    3.00
  11  -9   0   14.80    2.80
  11  -9   0   17.80    5.40
  11  -9   0   23.70    5.60
  11  -9   0   20.30    3.80
 -11   9   0   13.70    4.40
  10  -9   0   25.20    3.80
  10  -9   0   20.20    3.20
  10  -9   0   27.10    3.20
  10  -9   0   28.10    5.40
  10  -9   0   14.30    5.60
 -10   9   0   18.40    5.10
 -10   9   0   22.10    2.00
   9  -9   0   34.50    3.60
   9  -9   0   39.20    6.40
   9  -9   0   34.40    3.60
   9  -9   0   39.40    4.50
   9  -9   0   41.20    6.30
  -9   9   0   36.30    3.10
  -9   9   0   36.70    4.00
  -9   9   0   33.70    2.80
  -9   9   0   28.60    5.10
  -9   9   0   42.00    6.80
   8  -9   0   23.30    3.10
   8  -9   0   24.90    3.10
   8  -9   0   20.50    3.40
   8  -9   0   27.40    5.70
   8  -9   0   35.40    6.00
  -8   9   0   24.80    2.80
  -8   9   0   24.00    2.60
  -8   9   0   16.80    5.40
  -8   9   0   27.40    3.50
  -8   9   0   25.00    5.70
   7  -9   0   40.60    6.10
   7  -9   0   37.70    3.90
   7  -9   0   30.20    5.50
   7  -9   0   42.50    4.00
   7  -9   0   27.30    3.00
  -7   9   0   34.70    3.70
  -7   9   0   40.80    6.20
  -7   9   0   40.60    4.10
  -7   9   0   31.00    3.30
   6  -9   0    1.50    4.70
   6  -9   0    2.20    2.40
   6  -9   0   -1.20    2.50
   6  -9   0   -3.40    4.10
   6  -9   0   -0.70    2.30
  -6   9   0    0.90    2.20
  -6   9   0   -1.00    4.40
  -6   9   0    2.00    2.40
  -6   9   0    2.70    2.10
   5  -9   0    6.30    4.10
   5  -9   0    6.50    2.10
   5  -9   0   13.30    3.00
   5  -9   0   10.30    4.70
   5  -9   0    6.50    2.50
  -5   9   0   12.80    4.20
  -5   9   0   10.30    4.90
  -5   9   0    9.30    2.50
  -5   9   0   10.10    2.60
   4  -9   0   38.70    3.80
   4  -9   0   37.40    3.50
   4  -9   0   42.80    3.70
   4  -9   0   43.40    6.90
   4  -9   0   34.60    5.10
  -4   9   0   48.00    3.70
  -4   9   0   42.10    4.00
  -4   9   0   39.00    5.10
  -4   9   0   46.40    6.80
  -4   9   0   45.90    4.10
   3  -9   0   33.50    3.30
   3  -9   0   35.50    6.30
   3  -9   0   44.90    3.80
   3  -9   0   39.20    4.60
   3  -9   0   44.10    6.80
  -3   9   0   37.80    3.60
  -3   9   0   37.50    3.40
  -3   9   0   29.30    4.60
  -3   9   0   39.10    6.50
  -3   9   0   42.80    4.20
   2  -9   0   11.90    2.50
   2  -9   0    8.90    5.20
   2  -9   0    6.40    2.40
   2  -9   0    5.40    3.10
   2  -9   0   10.20    3.30
  -2   9   0    7.00    3.30
  -2   9   0   11.10    3.10
  -2   9   0    8.60    2.40
  -2   9   0    9.50    3.00
  -2   9   0    7.70    4.80
   1  -9   0   11.80    4.00
   1  -9   0   10.30    2.60
   1  -9   0   10.90    3.20
   1  -9   0   12.20    4.70
   1  -9   0   16.90    3.40
   1  -9   0   15.00    3.50
  -1   9   0    6.20    4.80
  -1   9   0   17.70    2.80
  -1   9   0    8.80    2.50
  -1   9   0   11.50    3.20
  -1   9   0   12.20    3.90
   0  -9   0   12.40    5.90
   0  -9   0   18.10    3.70
   0  -9   0   13.20    2.80
   0  -9   0   14.90    2.80
   0  -9   0   13.30    3.20
   0  -9   0   12.40    4.10
   0   9   0   18.90    3.00
   0   9   0   15.80    3.50
   0   9   0   12.60    3.90
   0   9   0   14.60    2.90
   0   9   0   13.50    5.50
  -1  -9   0    1.40    3.70
  -1  -9   0    0.50    2.80
  -1  -9   0    6.50    3.40
  -1  -9   0   -3.40    2.70
  -1  -9   0    4.70    5.20
  -1  -9   0   -0.70    2.50
  -1  -9   0    1.40    2.00
   1   9   0    2.60    2.60
   1   9   0   -0.70    4.30
   1   9   0    1.10    2.20
   1   9   0    0.70    3.40
   1   9   0   -0.20    2.10
  -2  -9   0   -2.10    1.80
  -2  -9   0    1.50    2.50
  -2  -9   0    0.70    3.20
  -2  -9   0    2.80    5.50
  -2  -9   0    3.30    3.90
  -2  -9   0    0.80    2.70
  -2  -9   0   -3.20    2.60
   2   9   0    3.70    2.60
   2   9   0    1.90    3.50
   2   9   0    2.50    2.90
   2   9   0   -1.40    2.90
   2   9   0   -0.20    4.20
  -3  -9   0    5.50    3.60
  -3  -9   0    6.30    5.00
  -3  -9   0    4.30    2.90
  -3  -9   0    4.10    2.90
  -3  -9   0    4.00    6.90
  -3  -9   0    7.20    2.80
   3   9   0   10.40    2.80
   3   9   0    9.40    2.70
   3   9   0    3.50    3.80
   3   9   0    4.90    3.20
   3   9   0    5.20    4.90
  -4  -9   0    2.70    3.70
  -4  -9   0    5.00    6.10
  -4  -9   0    9.90    2.90
  -4  -9   0    7.70    4.70
  -4  -9   0    8.10    3.00
   4   9   0   11.40    3.40
   4   9   0    7.60    3.90
   4   9   0    7.10    3.30
   4   9   0    8.40    3.30
   4   9   0   10.20    5.00
  -5  -9   0    6.50    6.00
  -5  -9   0    3.40    4.20
  -5  -9   0    5.20    2.80
  -5  -9   0    5.40    3.80
  -5  -9   0   13.50    3.20
   5   9   0    5.30    3.30
   5   9   0    1.50    3.20
   5   9   0   10.20    4.90
   5   9   0    3.20    4.20
   5   9   0    6.30    3.10
  -6  -9   0    5.00    2.80
  -6  -9   0   -0.40    4.10
  -6  -9   0    4.20    5.90
  -6  -9   0    4.30    2.70
  -6  -9   0    6.70    4.30
   6   9   0   -1.50    3.00
   6   9   0    3.90    4.50
   6   9   0    0.20    3.00
   6   9   0    0.40    2.90
   6   9   0   11.10    5.00
  -7  -9   0   13.70    5.00
  -7  -9   0    2.70    2.90
  -7  -9   0    4.30    3.90
  -7  -9   0    7.60    2.70
  -7  -9   0    4.20    5.70
   7   9   0   -6.50    4.40
   7   9   0   17.30    5.00
   7   9   0    4.70    3.20
   7   9   0    0.90    3.00
   7   9   0    1.70    3.40
  12 -10   0    7.00    3.60
  12 -10   0    6.00    2.90
  12 -10   0    7.30    2.80
 -12  10   0    7.00    4.90
  11 -10   0   25.80    4.20
  11 -10   0   17.00    5.30
  11 -10   0   32.00    5.90
  11 -10   0   24.40    3.20
 -11  10   0   18.70    4.80
  10 -10   0   38.80    6.10
  10 -10   0   23.90    3.50
  10 -10   0   30.70    4.20
  10 -10   0   28.60    6.10
  10 -10   0   24.00    3.40
 -10  10   0   22.20    5.20
 -10  10   0   26.30    2.70
 -10  10   0   30.00    6.30
 -10  10   0   34.00    3.00
 -10  10   0   28.30    3.90
   9 -10   0   12.40    2.80
   9 -10   0   12.60    3.30
   9 -10   0   13.00    3.00
   9 -10   0   15.50    5.20
  -9  10   0   15.70    2.40
  -9  10   0   18.90    5.70
  -9  10   0   17.70    2.50
  -9  10   0   11.50    4.70
   8 -10   0   52.69    5.00
   8 -10   0   44.20    4.20
   8 -10   0   53.19    6.70
   8 -10   0   49.50    6.80
   8 -10   0   40.70    4.10
  -8  10   0   45.40    6.60
  -8  10   0   49.10    3.90
  -8  10   0   41.80    3.60
  -8  10   0   48.20    4.50
   7 -10   0    5.50    2.70
   7 -10   0   10.40    5.10
   7 -10   0    3.40    2.50
   7 -10   0    7.20    2.80
   7 -10   0    5.30    3.50
  -7  10   0    6.00    2.30
  -7  10   0    9.90    2.90
  -7  10   0    4.00    5.60
  -7  10   0    6.40    2.40
   6 -10   0   24.00    6.10
   6 -10   0   21.80    2.90
   6 -10   0   17.60    3.10
   6 -10   0   23.00    3.00
   6 -10   0   25.60    5.00
  -6  10   0   21.40    3.20
  -6  10   0   24.40    3.20
  -6  10   0   26.90   10.90
  -6  10   0   21.70    4.70
   5 -10   0   43.00    7.10
   5 -10   0   40.40    3.90
   5 -10   0   35.60    5.70
   5 -10   0   37.30    4.00
   5 -10   0   43.70    4.30
  -5  10   0   44.70    3.80
  -5  10   0   37.30    3.40
  -5  10   0   33.90    4.70
  -5  10   0   36.90    3.90
  -5  10   0   43.00    7.20
   4 -10   0   65.49    7.70
   4 -10   0   60.29    5.10
   4 -10   0   80.59    5.20
   4 -10   0   64.19    6.50
   4 -10   0   69.69    4.40
  -4  10   0   70.09    6.80
  -4  10   0   67.19    6.40
  -4  10   0   75.09    4.90
  -4  10   0   66.09    4.30
  -4  10   0   69.89    4.30
   3 -10   0   87.29    5.40
   3 -10   0   79.39    4.60
   3 -10   0   79.89    6.70
   3 -10   0   81.09    7.90
   3 -10   0   73.59    4.60
  -3  10   0   80.69    4.60
  -3  10   0   76.99    6.60
  -3  10   0   83.49    9.70
  -3  10   0   75.09    5.40
  -3  10   0   72.69    4.50
   2 -10   0   32.80    4.40
   2 -10   0   31.60    3.40
   2 -10   0   32.20    3.60
   2 -10   0   44.60    6.90
   2 -10   0   38.60    5.30
   2 -10   0   37.10    3.70
  -2  10   0   26.00   10.00
  -2  10   0   32.20    4.90
  -2  10   0   39.30    4.30
  -2  10   0   28.50    3.90
  -2  10   0   33.30    3.40
   1 -10   0  112.79    6.50
   1 -10   0  109.29    6.10
   1 -10   0  106.79    7.40
   1 -10   0  104.99    5.30
   1 -10   0   96.79    5.90
   1 -10   0   94.99    8.70
  -1  10   0  103.59    8.30
  -1  10   0   96.19    6.00
  -1  10   0  101.29    5.30
  -1  10   0  100.89    7.00
  -1  10   0  105.69    5.40
   0 -10   0    5.60    2.50
   0 -10   0    4.90    3.90
   0 -10   0    7.50    3.40
   0 -10   0    5.30    2.40
   0 -10   0    4.40    2.50
   0 -10   0    4.20    3.00
   0  10   0    3.60    2.40
   0  10   0    3.90    2.60
   0  10   0    3.30    3.50
   0  10   0    7.70    3.20
   0  10   0    8.10    5.20
  -1 -10   0   -2.20    2.00
  -1 -10   0    5.80    7.00
  -1 -10   0    0.90    2.80
  -1 -10   0    0.80    2.30
  -1 -10   0   -0.10    4.90
  -1 -10   0   -2.10    3.10
   1  10   0   -0.10    4.80
   1  10   0   -1.00    3.30
   1  10   0   -1.30    2.10
   1  10   0   -1.80    2.80
   1  10   0   -1.70    2.20
  -2 -10   0   -1.00    2.40
  -2 -10   0   -1.80    3.00
  -2 -10   0    0.40    4.00
  -2 -10   0   -3.20    1.90
  -2 -10   0   -2.90    5.80
  -2 -10   0   -1.30    3.30
   2  10   0   -5.40    2.90
   2  10   0    1.10    3.20
   2  10   0   -2.00    4.80
   2  10   0   -3.90    2.60
  -3 -10   0    1.40    2.20
  -3 -10   0    3.60    3.00
  -3 -10   0   -1.50    3.40
  -3 -10   0   -5.80    3.80
  -3 -10   0    2.10    2.40
  -3 -10   0   -2.20    4.70
   3  10   0    4.10    2.60
   3  10   0   -3.70    2.50
   3  10   0    0.00    3.20
   3  10   0   -0.50    3.60
   3  10   0   -3.00    4.10
  -4 -10   0   -0.70    2.70
  -4 -10   0    0.70    4.10
  -4 -10   0   -0.40    4.00
  -4 -10   0    1.90    2.80
  -4 -10   0   -5.80    5.60
   4  10   0    5.80    3.20
   4  10   0   -1.70    3.00
   4  10   0   -4.90    3.50
   4  10   0   -2.30    4.50
  -5 -10   0   -0.80    4.30
  -5 -10   0   -2.50    5.80
  -5 -10   0   -0.40    2.70
  -5 -10   0    0.10    2.90
  -5 -10   0    1.00    3.80
   5  10   0   -5.40    3.00
   5  10   0   -5.90    2.80
   5  10   0   -3.80    2.70
   5  10   0   -6.20    3.90
   5  10   0    7.40    5.20
  -6 -10   0    3.80    4.40
  -6 -10   0    2.60    4.20
  -6 -10   0   -0.30    2.70
  -6 -10   0    1.60    6.00
  -6 -10   0    5.10    2.90
   6  10   0    4.50    3.30
   6  10   0   11.60    5.00
   6  10   0   -5.20    4.50
   6  10   0    1.40    3.40
  11 -11   0    9.90    3.50
  11 -11   0    9.20    2.80
  11 -11   0    3.30    3.00
  11 -11   0   13.60    4.90
  11 -11   0   10.40    4.90
 -11  11   0    5.00    1.60
  10 -11   0    9.00    5.20
  10 -11   0   21.90    5.50
  10 -11   0   11.60    3.30
  10 -11   0   15.90    3.80
  10 -11   0    9.80    5.70
 -10  11   0   12.20    2.40
 -10  11   0   16.50    3.40
 -10  11   0   23.20    5.90
 -10  11   0   10.70    2.20
   9 -11   0    6.70    4.40
   9 -11   0   18.70    3.70
   9 -11   0   19.40    5.60
   9 -11   0   14.40    3.40
   9 -11   0    8.40    3.30
  -9  11   0   10.40    3.00
  -9  11   0   14.90    2.60
  -9  11   0   19.30    5.80
  -9  11   0   18.40    2.70
   8 -11   0   22.00    3.60
   8 -11   0   23.60    5.60
   8 -11   0   28.10    6.40
   8 -11   0   26.80    3.70
   8 -11   0   23.40    3.60
  -8  11   0   29.00    3.20
  -8  11   0   23.00    2.90
  -8  11   0   29.20    6.40
  -8  11   0   16.10    3.20
   7 -11   0    5.60    2.90
   7 -11   0    7.50    4.50
   7 -11   0   14.10    5.50
   7 -11   0    9.70    3.00
   7 -11   0   11.20    3.00
  -7  11   0    8.80    2.60
  -7  11   0   11.60    5.50
  -7  11   0    4.80    2.70
  -7  11   0    8.90    2.70
   6 -11   0   48.80    7.20
   6 -11   0   33.20    3.50
   6 -11   0   39.80    4.30
   6 -11   0   33.20    3.70
   6 -11   0   36.40    5.90
  -6  11   0   48.60    4.20
  -6  11   0   46.40    6.60
  -6  11   0   43.80    4.30
  -6  11   0   34.90    5.60
  -6  11   0   43.50    4.00
   5 -11   0   57.19    4.90
   5 -11   0   61.09    4.40
   5 -11   0   56.69    7.70
   5 -11   0   53.59    6.20
   5 -11   0   53.39    5.00
  -5  11   0   58.19    6.50
  -5  11   0   47.30    3.70
  -5  11   0   55.19    4.30
  -5  11   0   48.90    4.60
   4 -11   0   85.29    7.20
   4 -11   0   92.79    5.00
   4 -11   0   87.59    5.60
   4 -11   0   90.29    8.30
   4 -11   0   89.19    5.10
  -4  11   0   89.39    7.20
  -4  11   0   83.09    5.00
  -4  11   0   81.49    4.80
  -4  11   0   83.39    7.80
   3 -11   0    7.70    5.90
   3 -11   0    6.20    3.10
   3 -11   0   10.90    3.50
   3 -11   0    5.20    3.70
   3 -11   0    7.20    2.60
   3 -11   0    2.90    3.30
  -3  11   0   12.90    2.80
  -3  11   0    3.10    3.10
  -3  11   0    6.80    2.60
  -3  11   0    6.40    4.10
   2 -11   0   35.20    5.50
   2 -11   0   42.30    4.00
   2 -11   0   39.50    4.30
   2 -11   0   32.10    4.60
   2 -11   0   32.70    3.80
   2 -11   0   39.40    7.50
  -2  11   0   40.90    4.00
  -2  11   0   43.50    4.50
  -2  11   0   29.90    8.00
  -2  11   0   40.90    4.00
  -2  11   0   39.70    7.10
   1 -11   0    4.40    3.80
   1 -11   0   12.00    6.30
   1 -11   0    4.10    3.20
   1 -11   0   10.90    2.80
   1 -11   0    8.40    2.60
   1 -11   0   11.90    3.80
  -1  11   0    6.60    2.70
  -1  11   0    8.20    6.00
  -1  11   0    7.80    5.30
  -1  11   0   12.10    3.00
   0 -11   0    8.40    3.40
   0 -11   0    3.30    2.50
   0 -11   0    7.10    2.80
   0 -11   0    8.00    4.40
   0 -11   0    5.90    2.60
   0 -11   0    5.50    6.30
   0 -11   0    9.90    3.70
   0  11   0   12.40    3.50
   0  11   0    2.10    3.80
   0  11   0    7.10    3.20
   0  11   0   12.70    5.70
  -1 -11   0    4.50    2.60
  -1 -11   0    1.70    4.20
  -1 -11   0    3.30    3.60
  -1 -11   0    9.10    6.70
  -1 -11   0    1.30    3.00
  -1 -11   0    1.30    2.50
  -1 -11   0    4.70    2.70
   1  11   0    4.30    3.40
   1  11   0    4.00    3.50
   1  11   0    2.40    2.70
   1  11   0    6.70    5.30
   1  11   0    4.90    2.60
  -2 -11   0   -3.00    3.40
  -2 -11   0    1.30    3.80
  -2 -11   0   -0.80    5.30
  -2 -11   0    2.50    4.20
  -2 -11   0    0.10    2.90
  -2 -11   0   -5.20    1.90
  -2 -11   0    5.20    2.70
   2  11   0    6.20    5.10
   2  11   0   -1.30    2.60
   2  11   0    7.70    4.30
   2  11   0   -3.10    3.20
   2  11   0    1.40    3.60
  -3 -11   0    4.80    3.30
  -3 -11   0   -3.10    4.10
  -3 -11   0    0.00    2.90
  -3 -11   0    2.60    6.50
  -3 -11   0   -3.00    3.00
  -3 -11   0    4.70    3.90
   3  11   0   -4.90    3.20
   3  11   0    8.60    5.20
   3  11   0   -5.40    2.70
   3  11   0    4.50    3.50
   3  11   0   -0.70    3.70
  -4 -11   0   -1.70    2.70
  -4 -11   0   -4.60    5.80
  -4 -11   0   -2.20    4.20
  -4 -11   0   -4.10    2.80
  -4 -11   0   -6.10    7.00
   4  11   0    3.30    4.50
   4  11   0   -2.90    3.90
   4  11   0    3.20    3.30
   4  11   0   -6.30    2.60
   4  11   0   -0.30    3.10
  -5 -11   0   -0.90    4.50
  -5 -11   0   -2.20    3.70
  -5 -11   0    1.30    6.60
  -5 -11   0   -1.10    2.70
  -5 -11   0   -1.40    3.60
   5  11   0    1.40    3.40
   5  11   0   -0.10    3.30
   5  11   0   -2.80    4.30
   5  11   0    5.80    3.50
   5  11   0    9.30    5.90
  11 -12   0    4.80    3.00
  11 -12   0    6.50    5.10
 -11  12   0    3.00    2.00
  10 -12   0   -0.10    3.00
  10 -12   0    4.70    4.80
  10 -12   0    1.80    3.00
  10 -12   0    4.40    4.10
  10 -12   0   10.90    4.00
 -10  12   0    3.30    2.10
 -10  12   0    1.20    2.70
 -10  12   0   11.10    5.20
 -10  12   0    3.50    2.40
   9 -12   0    3.50    2.80
   9 -12   0   11.80    5.70
   9 -12   0    8.60    3.20
   9 -12   0    8.20    3.00
   9 -12   0    4.10    5.70
  -9  12   0   10.20    2.70
  -9  12   0    1.90    2.80
  -9  12   0   10.00    5.60
   8 -12   0   16.60    3.70
   8 -12   0   11.90    5.00
   8 -12   0   13.90    3.70
   8 -12   0   14.10    3.20
   8 -12   0   12.80    5.70
  -8  12   0   16.20    3.00
  -8  12   0   17.40    3.40
  -8  12   0   17.50    5.10
  -8  12   0   25.10    6.20
   7 -12   0   18.90    6.10
   7 -12   0   16.20    3.00
   7 -12   0   15.90    3.50
   7 -12   0   18.80    5.50
   7 -12   0   14.70    3.20
  -7  12   0   25.90    6.40
  -7  12   0   22.40    3.90
  -7  12   0   16.30    3.40
  -7  12   0   23.10    3.40
   6 -12   0   40.50    4.60
   6 -12   0   53.69    7.70
   6 -12   0   40.50    4.50
   6 -12   0   40.80    6.40
  -6  12   0   47.30    4.50
  -6  12   0   33.80    5.20
  -6  12   0   43.70    7.50
  -6  12   0   54.39    4.60
   5 -12   0   32.40    3.70
   5 -12   0   48.80    5.10
   5 -12   0   38.50    6.10
   5 -12   0   33.80    4.00
   5 -12   0   35.80    5.80
  -5  12   0   37.50    3.90
  -5  12   0   36.40    3.70
  -5  12   0   40.10    4.30
  -5  12   0   48.90    6.40
  -5  12   0   46.00    7.20
   4 -12   0   19.60    3.30
   4 -12   0   18.40    6.70
   4 -12   0   19.40    4.80
   4 -12   0   24.60    4.10
   4 -12   0   18.10    3.20
  -4  12   0   18.70    4.80
  -4  12   0   15.10    3.00
  -4  12   0   18.20    4.40
  -4  12   0   21.20    6.20
  -4  12   0   16.80    2.90
   3 -12   0   24.40    3.50
   3 -12   0   38.10    6.40
   3 -12   0   24.10    4.90
   3 -12   0   27.60    6.40
   3 -12   0   24.90    3.60
   3 -12   0   22.50    4.50
  -3  12   0   34.40    6.90
  -3  12   0   28.80    3.90
  -3  12   0   24.50    4.10
  -3  12   0   29.90    5.00
  -3  12   0   31.80    3.70
   2 -12   0   14.90    3.10
   2 -12   0   16.90    4.00
   2 -12   0   15.70    3.80
   2 -12   0   17.20    4.40
   2 -12   0   17.10    6.80
   2 -12   0   11.00    4.40
  -2  12   0   22.20    4.10
  -2  12   0   14.80    5.40
  -2  12   0   17.00    3.90
  -2  12   0   16.00    4.50
  -2  12   0   17.70    3.30
   1 -12   0   15.60    3.60
   1 -12   0   15.00    4.90
   1 -12   0   16.30    4.40
   1 -12   0   18.80    4.00
   1 -12   0   16.40    3.20
   1 -12   0    8.20    2.80
   1 -12   0   13.10    6.90
  -1  12   0   12.60    3.10
  -1  12   0   17.80    3.90
  -1  12   0    8.90    2.90
  -1  12   0   12.80    4.20
  -1  12   0   15.80    6.10
   0 -12   0   11.10    4.60
   0 -12   0   13.00    3.60
   0 -12   0   15.30    3.70
   0 -12   0    8.70    3.00
   0 -12   0   16.90    4.40
   0 -12   0    9.20    7.00
   0 -12   0   12.50    3.10
   0  12   0   14.10    4.50
   0  12   0    8.90    2.90
   0  12   0   12.80    6.00
   0  12   0   12.00    3.80
   0  12   0    8.40    3.10
  -1 -12   0    3.60    3.80
  -1 -12   0    3.50    2.80
  -1 -12   0   -1.90    6.40
  -1 -12   0    8.70    3.60
  -1 -12   0    1.90    2.80
  -1 -12   0    4.60    2.60
  -1 -12   0    1.20    4.40
   1  12   0    7.50    3.00
   1  12   0    9.70    3.20
   1  12   0   12.70    5.60
   1  12   0    6.30    3.60
   1  12   0    7.30    4.20
  -2 -12   0    9.60    3.80
  -2 -12   0   13.70    7.20
  -2 -12   0   14.90    3.30
  -2 -12   0    9.30    5.10
  -2 -12   0    3.40    2.50
  -2 -12   0   12.80    3.30
   2  12   0   12.60    3.30
   2  12   0   10.90    3.50
   2  12   0   12.50    3.30
   2  12   0    9.30    4.40
   2  12   0   21.20    5.50
  -3 -12   0    9.10    3.60
  -3 -12   0    4.60    4.90
  -3 -12   0    4.90    6.50
  -3 -12   0    2.90    4.10
  -3 -12   0    5.00    6.00
   3  12   0   14.20    6.10
   3  12   0   11.00    4.70
   3  12   0   -0.60    3.60
   3  12   0    3.10    3.70
   3  12   0   -0.10    3.00
  -4 -12   0    1.20    3.30
  -4 -12   0    2.00    4.30
  -4 -12   0    0.60   12.90
  -4 -12   0    1.60    4.80
  -4 -12   0    2.80    3.30
   4  12   0   -2.30    2.90
   4  12   0   -0.20    4.50
   4  12   0    4.30    3.60
   4  12   0    2.90    3.70
  10 -13   0    0.90    3.00
  10 -13   0   -2.00    3.10
  10 -13   0    9.90    5.80
  10 -13   0    4.90    3.30
 -10  13   0   -1.20    2.70
 -10  13   0    2.00    2.20
 -10  13   0    8.20    4.90
   9 -13   0    2.10    4.90
   9 -13   0    2.90    3.00
   9 -13   0    6.50    5.00
   9 -13   0   -5.50    2.70
  -9  13   0    5.70    2.90
  -9  13   0   13.90    5.50
  -9  13   0    3.00    2.20
  -9  13   0   -1.20    2.80
   8 -13   0    9.00    3.40
   8 -13   0    1.60    2.70
   8 -13   0    8.20    7.60
   8 -13   0   10.70    3.50
   8 -13   0   16.10    6.30
  -8  13   0    8.30    2.80
  -8  13   0   21.20    6.20
   7 -13   0    2.60    2.90
   7 -13   0    3.60    2.90
   7 -13   0    0.10    4.60
   7 -13   0   -0.50    2.90
   7 -13   0    4.10    5.60
  -7  13   0    0.10    3.00
  -7  13   0    4.30    3.20
  -7  13   0    4.10    4.50
  -7  13   0    0.60    2.70
   6 -13   0    8.10    4.80
   6 -13   0    3.90    2.80
   6 -13   0   11.10    3.60
   6 -13   0   13.10    3.60
   6 -13   0    9.40    6.20
  -6  13   0   13.00    4.70
  -6  13   0    9.10    3.00
  -6  13   0   11.40    3.00
  -6  13   0    5.30    3.00
  -6  13   0   19.10    6.30
   5 -13   0   15.00    3.20
   5 -13   0   19.30    7.00
   5 -13   0   18.20    5.40
   5 -13   0   20.40    4.00
   5 -13   0   17.60    3.90
  -5  13   0   16.80    3.10
  -5  13   0   22.70    6.70
  -5  13   0   20.20    3.80
  -5  13   0   12.10    4.50
  -5  13   0   17.40    3.10
   4 -13   0    4.80    3.40
   4 -13   0    0.90    3.50
   4 -13   0   -0.10    4.20
   4 -13   0    8.00    2.80
   4 -13   0    6.50    2.70
   4 -13   0   11.40    6.20
  -4  13   0    6.60    4.00
  -4  13   0    7.70    2.70
  -4  13   0    4.20    2.70
  -4  13   0    9.50    5.30
   3 -13   0   19.40    4.00
   3 -13   0   11.30    6.80
   3 -13   0   15.90    4.40
   3 -13   0   12.70    3.00
   3 -13   0    8.70    4.80
   3 -13   0   18.50    3.40
  -3  13   0    9.80    2.90
  -3  13   0   13.80    3.50
  -3  13   0   18.90    5.40
  -3  13   0   20.50    4.00
  -3  13   0   12.20    4.40
   2 -13   0    9.50    2.80
   2 -13   0   12.70    3.80
   2 -13   0   15.90    4.00
   2 -13   0   11.90    5.00
   2 -13   0   10.30    4.20
   2 -13   0    8.30    3.60
   2 -13   0   11.50    6.20
  -2  13   0   11.30    4.20
  -2  13   0    8.40    3.00
  -2  13   0   19.10    6.20
  -2  13   0   10.80    3.90
  -2  13   0    9.80    3.70
   1 -13   0   13.20    4.30
   1 -13   0    7.90    4.20
   1 -13   0   18.90    7.60
   1 -13   0    8.80    2.90
   1 -13   0   15.70    3.80
   1 -13   0    2.50    4.50
   1 -13   0    7.20    3.60
  -1  13   0   10.00    4.30
  -1  13   0    3.20    3.50
  -1  13   0    9.20    4.50
  -1  13   0   19.20    6.10
  -1  13   0   13.30    3.40
   0 -13   0    1.60    3.80
   0 -13   0    4.20    3.70
   0 -13   0    5.40    3.00
   0 -13   0    7.10    3.00
   0 -13   0    0.70    4.40
   0 -13   0    2.70    2.60
   0 -13   0   -3.30    6.40
   0  13   0    2.10    2.80
   0  13   0   11.70    5.70
   0  13   0    4.70    4.30
   0  13   0    4.20    3.00
   0  13   0   -1.60    3.30
  -1 -13   0   15.00    4.70
  -1 -13   0   23.00    8.50
  -1 -13   0   14.40    3.40
  -1 -13   0    4.40    5.20
  -1 -13   0   15.90    4.20
  -1 -13   0    7.30    3.10
  -1 -13   0   12.40    3.90
   1  13   0   15.30    4.40
   1  13   0    6.90    4.40
   1  13   0   27.70   10.70
   1  13   0   13.90    3.50
   1  13   0   12.30    3.60
  -2 -13   0    9.20    3.30
  -2 -13   0   16.30    4.20
  -2 -13   0    3.00    2.80
  -2 -13   0   10.70    4.70
  -2 -13   0   12.30    3.40
  -2 -13   0    7.80    8.20
  -2 -13   0   11.20    5.60
   2  13   0    9.20    3.50
   2  13   0   16.80    4.10
   2  13   0    7.30    3.20
   2  13   0   26.80    6.30
   2  13   0   10.20    4.70
   8 -14   0    6.40    6.00
   8 -14   0    5.90    3.30
   8 -14   0    1.60    4.60
   8 -14   0   -1.00    2.90
  -8  14   0   -0.10    2.60
  -8  14   0    7.90    4.90
  -8  14   0    9.80    3.00
  -8  14   0    0.30    2.80
   7 -14   0    4.00    6.50
   7 -14   0   -0.20    3.40
   7 -14   0    0.40    2.90
   7 -14   0   -0.50    4.90
   7 -14   0    6.30    5.40
  -7  14   0    2.10    2.70
  -7  14   0    3.80    3.50
  -7  14   0    3.00    3.00
   6 -14   0   -5.30    8.10
   6 -14   0    0.20    3.20
   6 -14   0    9.70    6.50
   6 -14   0   -1.30    3.00
   6 -14   0   -1.70    2.60
  -6  14   0    5.70    6.60
  -6  14   0   -0.30    3.00
  -6  14   0    0.70    4.20
  -6  14   0    3.50    3.00
  -6  14   0   -0.90    2.40
   5 -14   0    5.20    3.50
   5 -14   0    0.90    2.60
   5 -14   0   -0.80    4.40
   5 -14   0   -3.60    5.40
   5 -14   0    1.10    3.50
   5 -14   0   -0.50    4.00
  -5  14   0   12.60    6.30
  -5  14   0   -0.60    2.30
  -5  14   0    2.70    3.10
  -5  14   0    6.10    4.40
  -5  14   0    3.90    2.70
   4 -14   0    5.30    3.50
   4 -14   0    2.70    2.80
   4 -14   0    8.80    6.60
   4 -14   0    5.90    5.00
   4 -14   0    5.40    4.20
   4 -14   0   14.80    4.10
  -4  14   0   14.10    3.20
  -4  14   0    5.60    2.70
  -4  14   0    8.20    2.90
  -4  14   0   11.20    4.40
   3 -14   0    3.70    6.90
   3 -14   0    6.00    6.60
   3 -14   0    0.20    3.30
   3 -14   0   -1.80    4.60
   3 -14   0    6.80    3.70
   3 -14   0    4.30    2.90
  -3  14   0    2.30    2.70
  -3  14   0   -1.20    3.70
  -3  14   0   14.90    3.90
  -3  14   0   10.30    8.90
  -3  14   0    0.50    3.10
   2 -14   0    3.70    3.70
   2 -14   0    8.20    4.20
   2 -14   0    4.40    4.30
   2 -14   0    7.20    2.90
   2 -14   0    1.40    3.70
   2 -14   0    0.00    4.80
  -2  14   0   -4.60    3.30
  -2  14   0    2.20    4.30
  -2  14   0   19.60    4.20
  -2  14   0   13.10    5.80
  -2  14   0    6.70    2.90
   1 -14   0    1.40    6.80
   1 -14   0    3.80    3.80
   1 -14   0   -2.30    4.60
   1 -14   0   -1.30    4.10
   1 -14   0    6.40    3.00
   1 -14   0    3.50    3.70
   1 -14   0    1.30    3.30
  -1  14   0    3.90    3.80
  -1  14   0   15.90    5.60
  -1  14   0    8.00    4.50
  -1  14   0   -2.30    2.60
  -1  14   0   -1.10    2.90
   0 -14   0    2.90    2.70
   0 -14   0    4.50    3.90
   0 -14   0    0.30    3.50
   0 -14   0    1.20    7.50
   0 -14   0    9.80    3.20
   0 -14   0    1.80    4.40
   0 -14   0   -8.20    5.60
   0  14   0    0.90    4.10
   0  14   0    2.00    3.30
   0  14   0    6.80    3.20
   0  14   0    7.70    4.10
   6 -15   0   -2.10    3.50
   6 -15   0   -6.60    6.10
   6 -15   0  -10.40    4.70
   6 -15   0    7.30    3.80
   6 -15   0   -2.70    2.70
  -6  15   0    6.00    4.70
  -6  15   0    8.30    3.50
  -6  15   0   -7.40    2.80
  -6  15   0   16.60    5.30
  -6  15   0    1.30    2.80
   5 -15   0   -5.20    4.50
   5 -15   0    7.60    3.90
   5 -15   0   -4.60    6.20
   5 -15   0    5.50    3.90
   5 -15   0    2.40    4.60
   5 -15   0   -0.40    2.90
  -5  15   0    0.70    4.40
  -5  15   0    0.00    6.10
  -5  15   0   18.10    5.60
  -5  15   0    0.30    2.70
   4 -15   0    2.30    7.20
   4 -15   0   -4.60    3.30
   4 -15   0    3.60    4.40
   4 -15   0   -0.50    2.70
   4 -15   0    1.40    4.30
   4 -15   0    7.20    3.80
   4 -15   0   -9.40    4.60
  -4  15   0    4.70    3.90
  -4  15   0    2.40    4.40
  -4  15   0   -2.30    3.30
  -4  15   0   16.70    5.50
  -4  15   0   -1.30    2.60
   3 -15   0    1.90    4.40
   3 -15   0    5.20    3.80
   3 -15   0    0.50    2.70
   3 -15   0   -5.60    3.70
   3 -15   0   -8.60    4.30
   3 -15   0   -4.20    6.20
   3 -15   0    3.50    4.00
  -3  15   0    5.10    5.00
  -3  15   0    3.80    3.90
  -3  15   0    1.80    3.70
  -3  15   0    0.80    2.70
  -2  15  -1    6.20    3.30
  -2  15  -1    6.60    4.10
  -2  15  -1   11.10    3.40
   2 -15   1    9.00    3.20
   2 -15   1    6.30    3.90
   2 -15   1   -1.70    5.60
   2 -15   1    7.80    4.20
   2 -15   1    6.90    4.20
   2 -15   1    5.70    4.60
   2 -15   1    0.00    5.30
  -3  15  -1   -0.90    3.70
  -3  15  -1   17.10    5.70
  -3  15  -1   -3.50    2.50
  -3  15  -1    5.90    7.60
  -3  15  -1    4.60    3.10
   3 -15   1   -1.90    7.20
   3 -15   1    6.00    4.30
   3 -15   1   -5.00    5.00
   3 -15   1    3.00    4.30
   3 -15   1    2.20    3.00
   3 -15   1   -7.10    3.50
   3 -15   1    4.70    3.80
  -4  15  -1    4.10    3.70
  -4  15  -1   14.50    5.10
  -4  15  -1    6.40    3.80
   4 -15   1    3.10    4.50
   4 -15   1    4.40    3.70
   4 -15   1   -4.30    4.70
   4 -15   1   10.90    4.90
   4 -15   1    5.70    3.30
   4 -15   1    4.00    7.50
   4 -15   1   11.40    4.30
  -5  15  -1    0.80    2.70
  -5  15  -1    0.80    4.50
   5 -15   1    0.70    4.70
   5 -15   1    0.30    6.10
   5 -15   1    5.20    4.40
   5 -15   1    1.80    3.60
   5 -15   1   -1.30    2.90
   5 -15   1    1.60    3.60
  -6  15  -1    7.30    4.50
  -6  15  -1    3.30    2.80
  -6  15  -1   17.60    6.00
  -6  15  -1   -1.10    3.10
  -6  15  -1    2.40    3.20
   6 -15   1    1.50    3.30
   6 -15   1   -0.40    3.80
   6 -15   1   -2.40    4.60
   6 -15   1   -4.20    2.90
   6 -15   1   -2.80    5.90
   1  14  -1    6.30    4.00
   1  14  -1    0.70    4.10
   1  14  -1   17.20    5.90
   1  14  -1   -5.60    4.80
  -1 -14   1   -0.20    3.40
  -1 -14   1   -6.20    6.50
  -1 -14   1    2.30    3.70
  -1 -14   1    8.40    4.90
  -1 -14   1    5.70    4.40
  -1 -14   1   -2.30    6.30
  -1 -14   1   -8.70    2.90
   0  14  -1    6.50    4.40
   0  14  -1    4.50    4.00
   0  14  -1    4.90    3.20
   0  14  -1   21.90    6.60
   0  14  -1    7.40    3.90
   0 -14   1    3.60    3.10
   0 -14   1    0.10    3.40
   0 -14   1    3.70    3.70
   0 -14   1    3.80    4.00
   0 -14   1    4.10    7.30
   0 -14   1    9.30    4.50
   0 -14   1   -2.10    4.90
  -1  14  -1   22.40    6.40
  -1  14  -1   12.30    3.40
  -1  14  -1   14.70    4.20
  -1  14  -1   13.50    4.80
  -1  14  -1   10.50    3.30
   1 -14   1    5.90    3.70
   1 -14   1   13.50    3.40
   1 -14   1   10.70    4.30
   1 -14   1   10.30    3.20
   1 -14   1    9.00    4.50
   1 -14   1    0.40    4.90
  -2  14  -1    3.40    4.20
  -2  14  -1    5.60    3.70
  -2  14  -1    8.00    5.40
  -2  14  -1   -3.60    3.30
  -2  14  -1   -0.70    2.70
   2 -14   1   -0.90    3.50
   2 -14   1    6.60    4.50
   2 -14   1    2.90    2.80
   2 -14   1    7.10    4.10
   2 -14   1    2.80    6.40
   2 -14   1   -0.80    4.60
   2 -14   1    2.40    3.70
  -3  14  -1   12.80    3.90
  -3  14  -1   12.80    3.20
  -3  14  -1   16.20    4.00
  -3  14  -1   19.20    4.90
   3 -14   1   11.50    3.30
   3 -14   1   11.00    7.40
   3 -14   1    8.00    5.00
   3 -14   1   15.00    3.40
   3 -14   1   16.80    8.50
   3 -14   1    5.80    4.10
   3 -14   1   13.30    3.40
  -4  14  -1   17.80    4.00
  -4  14  -1   11.60    3.80
  -4  14  -1   14.30    4.80
  -4  14  -1   27.60    7.20
  -4  14  -1   10.70    3.20
   4 -14   1   13.90    3.30
   4 -14   1   18.70    4.40
   4 -14   1   15.60    4.70
   4 -14   1   14.00    4.00
   4 -14   1   10.70    5.10
   4 -14   1   15.80    6.10
  -5  14  -1   19.50    5.80
  -5  14  -1   10.40    3.70
  -5  14  -1   17.00    5.10
  -5  14  -1   13.70    4.40
  -5  14  -1   10.00    3.10
   5 -14   1    9.80    3.80
   5 -14   1   10.10    3.30
   5 -14   1    1.50    4.80
   5 -14   1   13.10    6.50
   5 -14   1   16.60    4.20
  -6  14  -1    4.70    3.20
  -6  14  -1   12.70    5.30
  -6  14  -1    0.80    3.00
  -6  14  -1    4.10    2.80
  -6  14  -1   10.50    4.60
   6 -14   1    3.80    4.60
   6 -14   1    8.90    6.40
   6 -14   1    1.20    2.80
   6 -14   1    9.70    3.70
   6 -14   1    4.00    3.50
  -7  14  -1    9.10    3.00
  -7  14  -1   23.00    7.70
  -7  14  -1    9.90    3.30
  -7  14  -1   11.70    3.50
   7 -14   1    2.80    4.90
   7 -14   1    9.00    3.10
   7 -14   1   14.10    3.90
   7 -14   1    4.50    3.20
   7 -14   1   11.40    6.30
  -8  14  -1   17.00    3.60
  -8  14  -1    6.50    3.20
  -8  14  -1    4.70    3.20
   8 -14   1    9.00    3.70
   8 -14   1    1.60    3.10
   8 -14   1    2.50    4.60
   8 -14   1   14.60    6.80
   2  13  -1    1.60    3.60
   2  13  -1   16.20    5.10
   2  13  -1    4.70    4.40
   2  13  -1   -5.10    3.30
   2  13  -1   -0.90    3.30
  -2 -13   1    4.20    4.10
  -2 -13   1    5.90    3.70
  -2 -13   1    0.90    3.40
  -2 -13   1    2.00    4.70
  -2 -13   1    3.80    3.00
  -2 -13   1   14.60    9.90
   1  13  -1    0.90    3.70
   1  13  -1    5.60    4.20
   1  13  -1   -3.80    2.70
   1  13  -1    3.20    3.60
  -1 -13   1    1.60    4.60
  -1 -13   1   -2.70    6.40
  -1 -13   1   -2.60    2.80
  -1 -13   1    7.70    3.60
  -1 -13   1   -3.50    4.60
  -1 -13   1    2.30    2.80
  -1 -13   1   -1.20    3.20
   0  13  -1    2.60    3.60
   0  13  -1    9.10    5.10
   0  13  -1   -1.80    3.30
   0  13  -1    4.30    4.00
   0  13  -1    0.40    2.80
   0 -13   1   -2.60    2.50
   0 -13   1    3.00    3.50
   0 -13   1    0.60    6.60
   0 -13   1   -3.30    4.20
   0 -13   1    4.20    3.60
   0 -13   1   -2.40    2.90
  -1  13  -1    3.20    3.90
  -1  13  -1    3.60    3.10
  -1  13  -1    5.60    3.70
  -1  13  -1    7.60    5.30
   1 -13   1   -3.20    3.80
   1 -13   1   -7.40    5.70
   1 -13   1    3.00    3.60
   1 -13   1    0.00    3.20
   1 -13   1    0.50    3.50
  -2  13  -1    8.30    2.80
  -2  13  -1   11.00    3.80
  -2  13  -1   10.80    3.00
  -2  13  -1   23.40    6.40
  -2  13  -1   10.90    4.20
   2 -13   1   12.70    3.90
   2 -13   1   10.40    6.80
   2 -13   1    8.70    4.70
   2 -13   1    8.60    3.70
   2 -13   1   14.20    3.30
   2 -13   1    8.00    4.40
   2 -13   1   14.90    3.30
  -3  13  -1   16.80    4.70
  -3  13  -1   22.30    5.90
  -3  13  -1   11.50    3.20
  -3  13  -1   13.70    3.50
  -3  13  -1   20.70    3.90
   3 -13   1   16.80    6.60
   3 -13   1   18.20    3.90
   3 -13   1   21.90    4.20
   3 -13   1   15.70    3.30
   3 -13   1   10.80    4.10
   3 -13   1   12.80    4.90
  -4  13  -1   12.50    4.20
  -4  13  -1   15.10    3.60
  -4  13  -1   14.80    5.30
  -4  13  -1   10.40    3.00
  -4  13  -1   21.30    6.20
   4 -13   1   17.70    6.90
   4 -13   1   12.30    3.70
   4 -13   1   12.40    3.00
   4 -13   1    7.90    4.40
   4 -13   1   10.70    3.60
  -5  13  -1   21.50    6.30
  -5  13  -1   20.10    3.70
  -5  13  -1   15.90    3.20
  -5  13  -1   27.70    5.40
   5 -13   1   24.20    7.30
   5 -13   1   16.40    5.20
   5 -13   1   13.20    3.10
   5 -13   1   17.90    3.40
   5 -13   1   24.90    4.10
  -6  13  -1    7.00    2.90
  -6  13  -1   14.30    5.60
  -6  13  -1   11.50    4.30
  -6  13  -1    5.00    3.00
  -6  13  -1    7.10    3.10
   6 -13   1    3.60    2.80
   6 -13   1    1.90    4.20
   6 -13   1    6.60    6.00
   6 -13   1    6.80    3.40
   6 -13   1    4.10    3.30
  -7  13  -1   35.50    7.20
  -7  13  -1   27.20    3.80
  -7  13  -1   27.60    3.90
  -7  13  -1   31.30    3.90
   7 -13   1   24.20    5.90
   7 -13   1   32.90    7.40
   7 -13   1   26.40    4.20
   7 -13   1   19.70    3.70
   7 -13   1   26.90    4.20
  -8  13  -1   12.00    3.20
  -8  13  -1   16.50    5.80
  -8  13  -1   10.70    3.30
   8 -13   1   13.80    3.50
   8 -13   1   11.30    3.40
   8 -13   1   16.00    6.10
   8 -13   1   10.10    5.70
   8 -13   1    7.30    3.50
  -9  13  -1    9.30    3.20
  -9  13  -1    7.10    2.70
  -9  13  -1    6.10    2.40
  -9  13  -1   12.30    5.40
   9 -13   1   11.40    5.90
   9 -13   1   -0.50    3.00
   9 -13   1    8.70    5.50
   9 -13   1    8.90    3.40
 -10  13  -1    3.60    2.40
 -10  13  -1    2.90    3.00
 -10  13  -1    9.10    4.90
  10 -13   1    0.20    3.50
  10 -13   1    7.50    5.50
  10 -13   1    0.40    2.80
  10 -13   1   -1.30    3.30
   4  12  -1   -0.30    4.10
   4  12  -1   -2.70    3.20
   4  12  -1    2.70    3.50
   4  12  -1   -7.90    3.30
   4  12  -1    8.30    4.90
  -4 -12   1    2.80    4.10
  -4 -12   1    0.70    3.20
  -4 -12   1    0.70    4.60
  -4 -12   1   -0.80    3.00
   3  12  -1    0.30    3.30
   3  12  -1   -2.20    3.10
   3  12  -1   -0.50    2.40
   3  12  -1   -3.90    3.80
   3  12  -1    8.20    5.10
  -3 -12   1    0.90    2.70
  -3 -12   1    2.70    3.30
  -3 -12   1    1.00    4.50
  -3 -12   1    3.60    3.40
  -3 -12   1   -1.40    6.90
  -3 -12   1   -4.40    3.50
   2  12  -1    4.70    2.70
   2  12  -1    9.70    5.40
   2  12  -1    4.70    3.60
   2  12  -1   -1.50    3.00
   2  12  -1    2.50    3.70
  -2 -12   1    0.60    4.20
  -2 -12   1    1.00    3.80
  -2 -12   1   -1.40    6.30
  -2 -12   1    8.00    3.40
  -2 -12   1    5.50    3.20
  -2 -12   1    3.50    3.30
   1  12  -1    8.70    5.30
   1  12  -1   12.60    3.80
   1  12  -1    4.40    3.50
   1  12  -1    2.80    3.80
   1  12  -1    3.80    3.00
  -1 -12   1    6.50    3.40
  -1 -12   1    4.40    3.30
  -1 -12   1    8.40    2.90
  -1 -12   1    0.00    4.30
  -1 -12   1   -0.10    2.80
  -1 -12   1    0.90    4.00
  -1 -12   1   -5.00    6.10
   0  12  -1    1.10    3.40
   0  12  -1    4.10    3.30
   0  12  -1   12.90    5.70
   0  12  -1   -1.10    2.70
   0  12  -1    2.10    3.70
   0 -12   1    1.80    3.30
   0 -12   1    3.10    3.40
   0 -12   1    2.80    2.60
   0 -12   1    1.90    6.30
   0 -12   1    1.10    2.80
   0 -12   1   -4.70    3.70
  -1  12  -1    7.80    3.60
  -1  12  -1    6.30    5.20
  -1  12  -1    2.20    3.40
  -1  12  -1    9.80    3.90
  -1  12  -1    4.00    2.90
   1 -12   1    1.80    2.90
   1 -12   1    5.50    6.20
   1 -12   1   -1.00    2.50
   1 -12   1    2.20    4.00
   1 -12   1    7.00    3.40
   1 -12   1    3.50    3.30
   1 -12   1    6.10    3.60
  -2  12  -1   13.90    3.10
  -2  12  -1   15.80    5.50
  -2  12  -1   14.30    3.20
  -2  12  -1   13.60    4.40
   2 -12   1   10.40    4.50
   2 -12   1    8.00    6.30
   2 -12   1   19.60    3.90
   2 -12   1   13.90    4.60
   2 -12   1   12.30    3.00
   2 -12   1   20.80    4.00
   2 -12   1   17.30    3.20
  -3  12  -1   16.50    3.00
  -3  12  -1   17.80    4.40
  -3  12  -1   20.10    3.90
  -3  12  -1   28.30    6.50
  -3  12  -1   20.60    4.70
   3 -12   1   14.60    4.70
   3 -12   1   20.50    3.90
   3 -12   1   13.50    3.70
   3 -12   1   19.70    5.70
   3 -12   1   12.20    3.10
   3 -12   1   14.10    4.50
  -4  12  -1   12.10    3.20
  -4  12  -1   12.00    4.20
  -4  12  -1   22.60    6.10
  -4  12  -1   15.60    3.10
  -4  12  -1   19.30    6.00
   4 -12   1   15.90    3.70
   4 -12   1    8.70    3.40
   4 -12   1   10.70    4.40
   4 -12   1   17.00    6.40
   4 -12   1   10.70    3.60
  -5  12  -1   10.30    2.90
  -5  12  -1    9.20    4.50
  -5  12  -1   10.50    3.00
  -5  12  -1   20.80    6.30
  -5  12  -1   11.20    3.00
   5 -12   1   15.30    3.70
   5 -12   1    9.90    4.00
   5 -12   1    6.90    3.30
   5 -12   1   12.10    4.50
   5 -12   1   20.30    6.20
  -6  12  -1   10.50    3.70
  -6  12  -1   15.10    5.30
  -6  12  -1    7.70    2.90
  -6  12  -1   14.50    4.60
   6 -12   1    7.70    2.90
   6 -12   1    8.90    4.70
   6 -12   1    7.60    2.50
   6 -12   1    9.40    3.40
   6 -12   1    7.20    4.90
  -7  12  -1   22.30    3.50
  -7  12  -1   19.60    3.20
  -7  12  -1   27.60    6.50
  -7  12  -1   19.60    3.60
   7 -12   1   20.90    6.00
   7 -12   1   20.10    3.60
   7 -12   1   23.30    3.80
   7 -12   1   18.60    3.40
   7 -12   1   22.40    5.50
  -8  12  -1   32.50    6.80
  -8  12  -1   16.60    3.40
  -8  12  -1   12.90    2.80
   8 -12   1   15.50    5.30
   8 -12   1   12.20    3.30
   8 -12   1   17.40    3.50
   8 -12   1   19.20    3.60
   8 -12   1   19.20    5.90
  -9  12  -1    6.30    2.70
  -9  12  -1    3.10    2.90
  -9  12  -1   14.50    5.40
   9 -12   1    4.00    5.50
   9 -12   1    6.20    3.20
   9 -12   1   -3.20    3.10
   9 -12   1    4.10    2.90
   9 -12   1    7.90    5.40
 -10  12  -1    0.40    3.00
 -10  12  -1    4.20    2.10
 -10  12  -1    9.60    5.00
 -10  12  -1    9.50    2.50
  10 -12   1    8.90    4.80
  10 -12   1   -0.80    3.20
  10 -12   1    1.30    3.00
  10 -12   1    6.20    3.10
  10 -12   1    5.90    4.50
   5  11  -1    4.80    4.50
   5  11  -1    1.00    5.50
   5  11  -1    2.70    3.50
   5  11  -1    7.80    3.40
   5  11  -1   17.90    6.10
  -5 -11   1    7.20    4.70
  -5 -11   1    8.60    3.30
  -5 -11   1    7.60    7.30
  -5 -11   1    7.10    6.80
  -5 -11   1    6.80    3.40
   4  11  -1    0.50    3.30
   4  11  -1   -1.50    3.00
   4  11  -1    8.10    5.50
   4  11  -1   -2.80    3.90
   4  11  -1    8.60    3.70
  -4 -11   1    1.40    3.00
  -4 -11   1   -0.60    6.30
  -4 -11   1   -4.90    4.00
  -4 -11   1    0.80    3.00
  -4 -11   1    0.90    4.40
   3  11  -1   -4.10    2.60
   3  11  -1   -1.80    2.30
   3  11  -1   -1.30    3.80
   3  11  -1    0.00    3.40
   3  11  -1    3.50    4.60
  -3 -11   1   -3.20    1.10
  -3 -11   1   -1.90    5.70
  -3 -11   1   -2.00    2.60
  -3 -11   1   -0.70    2.80
  -3 -11   1   -0.50    3.50
  -3 -11   1   -0.40    4.20
  -3 -11   1   -3.60    2.80
   2  11  -1    0.50    2.70
   2  11  -1    6.30    5.30
   2  11  -1   -0.70    3.40
   2  11  -1    3.70    3.60
   2  11  -1   -1.20    2.30
  -2 -11   1    3.70    3.20
  -2 -11   1    1.60    5.80
  -2 -11   1   -5.40    4.00
  -2 -11   1    0.40    3.00
  -2 -11   1    1.90    2.70
  -2 -11   1   -1.00    3.40
   1  11  -1    3.50    3.50
   1  11  -1    1.00    3.20
   1  11  -1    3.90    2.70
   1  11  -1    4.50    4.70
   1  11  -1   -1.10    3.20
  -1 -11   1    0.60    2.70
  -1 -11   1    1.90    3.30
  -1 -11   1   -0.50    6.10
  -1 -11   1    1.90    3.20
  -1 -11   1    2.30    3.90
  -1 -11   1   -0.10    2.50
   0  11  -1    1.30    3.10
   0  11  -1    4.10    4.40
   0  11  -1    2.90    3.20
   0  11  -1    1.20    4.50
   0 -11   1    2.00    3.10
   0 -11   1    3.10    2.60
   0 -11   1   -5.10    5.60
   0 -11   1    4.80    3.30
   0 -11   1   -1.20    2.40
   0 -11   1   -4.40    2.70
   0 -11   1   -2.70    3.40
  -1  11  -1    1.30    2.20
  -1  11  -1   -1.50    3.00
  -1  11  -1    0.80    4.80
  -1  11  -1   -1.40    2.50
  -1  11  -1   -0.60    3.20
   1 -11   1    2.40    5.70
   1 -11   1    1.80    2.70
   1 -11   1    0.80    3.00
   1 -11   1    1.50    3.60
   1 -11   1    2.30    3.00
   1 -11   1    3.00    3.20
   1 -11   1    1.60    2.30
  -2  11  -1    4.80    2.50
  -2  11  -1    3.30    3.20
  -2  11  -1    6.00    3.20
  -2  11  -1    1.90    3.70
  -2  11  -1    3.40    3.20
   2 -11   1    2.90    3.20
   2 -11   1    4.90    3.00
   2 -11   1    8.30    4.20
   2 -11   1    5.50    5.80
   2 -11   1    0.60    2.40
   2 -11   1    3.80    3.10
  -3  11  -1   10.60    2.80
  -3  11  -1   13.30    3.50
  -3  11  -1   13.40    4.60
  -3  11  -1   12.40    4.00
  -3  11  -1    7.10    3.00
   3 -11   1   14.20    6.10
   3 -11   1    8.10    2.80
   3 -11   1   11.10    3.50
   3 -11   1   12.70    2.80
   3 -11   1   12.20    3.90
  -4  11  -1   20.10    3.50
  -4  11  -1   14.60    5.00
  -4  11  -1   12.90    3.20
  -4  11  -1    6.90    2.70
   4 -11   1   12.50    2.70
   4 -11   1   14.30    2.90
   4 -11   1   13.60    4.30
   4 -11   1   18.00    3.50
   4 -11   1   10.30    5.10
  -5  11  -1   13.60    3.10
  -5  11  -1   12.20    4.10
  -5  11  -1   11.60    2.90
  -5  11  -1   11.20    5.50
  -5  11  -1    9.60    2.30
   5 -11   1   14.20    6.00
   5 -11   1   11.90    2.80
   5 -11   1   10.90    3.20
   5 -11   1   12.10    4.20
   5 -11   1   12.40    2.90
  -6  11  -1    1.60    2.40
  -6  11  -1    0.00    2.40
  -6  11  -1   -0.80    3.80
  -6  11  -1    3.80    4.50
  -6  11  -1    3.50    3.10
   6 -11   1    0.00    2.50
   6 -11   1    3.90    4.40
   6 -11   1    4.00    5.10
   6 -11   1    2.70    2.80
   6 -11   1    3.60    2.80
  -7  11  -1    2.10    4.20
  -7  11  -1    6.90    2.80
  -7  11  -1    1.60    2.20
  -7  11  -1    0.20    2.50
   7 -11   1    3.20    4.90
   7 -11   1   -1.60    2.60
   7 -11   1   -3.60    4.60
   7 -11   1   -1.00    4.00
   7 -11   1    0.20    2.50
  -8  11  -1   24.20    3.00
  -8  11  -1   26.50    6.10
  -8  11  -1   23.40    3.90
  -8  11  -1   25.60    3.30
   8 -11   1   30.80    3.80
   8 -11   1   21.90    3.50
   8 -11   1   28.20    6.30
   8 -11   1   19.30    3.60
   8 -11   1   20.60    5.30
  -9  11  -1    1.70    3.00
  -9  11  -1    1.90    4.30
  -9  11  -1    1.60    2.00
  -9  11  -1    3.70    2.40
   9 -11   1    4.70    4.60
   9 -11   1   -1.50    3.90
   9 -11   1    3.30    2.70
   9 -11   1    6.00    3.10
   9 -11   1    2.50    2.90
 -10  11  -1   18.00    5.30
 -10  11  -1    5.00    2.40
 -10  11  -1    7.00    2.30
 -10  11  -1    7.40    3.10
  10 -11   1    8.50    4.80
  10 -11   1    4.80    3.40
  10 -11   1    6.90    3.20
  10 -11   1    8.10    3.10
  10 -11   1   11.20    7.10
 -11  11  -1    2.70    4.40
 -11  11  -1    4.70    1.70
  11 -11   1    6.80    3.60
  11 -11   1    5.30    3.10
  11 -11   1   11.50    3.10
  11 -11   1    8.50    4.70
  11 -11   1    1.40    4.60
   6  10  -1    5.60    3.40
   6  10  -1   16.10    3.80
   6  10  -1    7.90    4.70
   6  10  -1    7.10    3.70
   6  10  -1   20.90    5.90
  -6 -10   1   19.20    5.10
  -6 -10   1   13.20    7.10
  -6 -10   1    5.00    3.50
  -6 -10   1    5.40    3.30
   5  10  -1    1.60    2.80
   5  10  -1   10.30    3.60
   5  10  -1   14.10    5.50
   5  10  -1    5.50    4.30
   5  10  -1   12.20    3.50
  -5 -10   1    5.90    3.00
  -5 -10   1    3.30    4.10
  -5 -10   1   10.00    6.40
  -5 -10   1    2.70    4.50
  -5 -10   1    2.70    3.20
   4  10  -1    2.80    2.90
   4  10  -1    8.20    4.80
   4  10  -1    7.10    3.20
   4  10  -1   -1.40    3.70
   4  10  -1    4.50    3.90
  -4 -10   1    3.80    3.00
  -4 -10   1    0.20    2.70
  -4 -10   1    4.10    4.30
  -4 -10   1    6.30    3.70
  -4 -10   1    6.50    6.40
   3  10  -1    3.30    3.00
   3  10  -1    8.80    4.00
   3  10  -1   10.40    5.40
   3  10  -1    4.30    2.60
   3  10  -1    4.60    4.00
  -3 -10   1    5.10    2.90
  -3 -10   1    3.00    3.70
  -3 -10   1   -0.50    4.00
  -3 -10   1    1.60    2.80
  -3 -10   1    3.60    1.40
  -3 -10   1   11.20    6.50
  -3 -10   1    7.70    3.10
   2  10  -1    2.10    3.40
   2  10  -1   -2.00    2.50
   2  10  -1   -5.30    3.00
   2  10  -1    1.50    3.80
   2  10  -1    8.60    2.80
  -2 -10   1    0.60    3.30
  -2 -10   1    0.40    2.90
  -2 -10   1   -1.60    2.70
  -2 -10   1   -2.10    5.60
  -2 -10   1   -3.30    2.40
  -2 -10   1   -1.70    5.60
   1  10  -1   -2.30    4.20
   1  10  -1    2.30    3.10
   1  10  -1    0.10    3.00
   1  10  -1    3.50    2.70
   1  10  -1    6.00    3.60
  -1 -10   1   -0.10    3.50
  -1 -10   1    2.60    5.30
  -1 -10   1    1.10    3.20
  -1 -10   1   -0.80    4.10
  -1 -10   1    0.40    2.30
  -1 -10   1   -2.70    2.30
  -1 -10   1    4.80    3.00
   0  10  -1   31.50    4.70
   0  10  -1   37.00    6.00
   0  10  -1   33.00    3.70
   0  10  -1   28.00    3.40
   0  10  -1   41.20    4.40
   0 -10   1   38.60    3.90
   0 -10   1   44.90    4.30
   0 -10   1   44.80    5.20
   0 -10   1   46.80    9.50
   0 -10   1   32.50    3.70
   0 -10   1   42.10    3.80
   0 -10   1   37.90    5.10
  -1  10  -1   49.80    4.50
  -1  10  -1   50.49    4.10
  -1  10  -1   63.59    5.20
  -1  10  -1   49.30    5.70
  -1  10  -1   44.50    6.70
   1 -10   1   51.59    4.20
   1 -10   1   51.39    5.40
   1 -10   1   55.39    7.70
   1 -10   1   53.99    6.00
   1 -10   1   50.89    4.10
   1 -10   1   50.19    4.30
  -2  10  -1    1.30    3.50
  -2  10  -1    0.50    2.30
  -2  10  -1    2.90    2.30
  -2  10  -1    5.10    8.70
  -2  10  -1    9.30    3.20
   2 -10   1    2.30    5.20
   2 -10   1    0.50    2.40
   2 -10   1    4.30    2.40
   2 -10   1    3.10    3.00
   2 -10   1    2.50    3.20
   2 -10   1    3.20    3.80
  -3  10  -1   13.20    2.60
  -3  10  -1   13.30    2.80
  -3  10  -1    9.90    3.60
  -3  10  -1   15.40    5.60
  -3  10  -1   17.90    3.60
   3 -10   1   17.40    6.00
   3 -10   1   14.70    2.90
   3 -10   1   16.20    3.30
   3 -10   1    9.90    2.60
   3 -10   1   15.30    4.10
  -4  10  -1    2.20    2.70
  -4  10  -1   -2.60    3.40
  -4  10  -1    4.30    2.80
  -4  10  -1    1.10    3.70
  -4  10  -1    0.90    2.30
   4 -10   1    0.10    2.90
   4 -10   1   -0.30    3.90
   4 -10   1    6.20    5.30
   4 -10   1    8.80    3.00
   4 -10   1    5.60    2.60
  -5  10  -1   -1.90    4.40
  -5  10  -1    3.00    2.40
  -5  10  -1    3.10    2.50
  -5  10  -1    5.30    2.50
  -5  10  -1    2.90    3.90
   5 -10   1    5.40    4.60
   5 -10   1    4.90    2.70
   5 -10   1    5.00    2.60
   5 -10   1    2.20    2.70
  -6  10  -1    4.90    4.80
  -6  10  -1   12.80    2.80
  -6  10  -1   12.40    2.90
   6 -10   1   10.40    2.90
   6 -10   1   10.30    2.90
   6 -10   1   11.00    5.10
   6 -10   1    8.40    4.10
   6 -10   1    9.90    2.90
  -7  10  -1    1.00    4.80
  -7  10  -1    1.80    2.20
  -7  10  -1    3.30    2.70
  -7  10  -1    5.30    2.20
   7 -10   1    5.80    2.70
   7 -10   1    1.50    2.60
   7 -10   1   -2.10    3.90
   7 -10   1    4.80    2.90
   7 -10   1   -0.40    4.40
  -8  10  -1   13.30    8.60
  -8  10  -1    7.60    2.90
  -8  10  -1    9.20    2.60
  -8  10  -1    4.20    2.20
   8 -10   1    3.70    2.60
   8 -10   1    7.00    2.80
   8 -10   1    4.10    3.10
   8 -10   1    6.70    4.10
   8 -10   1   11.40    4.80
  -9  10  -1    2.60    2.20
  -9  10  -1    0.80    2.60
  -9  10  -1    3.30    1.90
  -9  10  -1    5.00    4.10
  -9  10  -1    5.20    4.50
   9 -10   1    7.20    3.20
   9 -10   1    1.80    2.70
   9 -10   1    3.40    4.30
   9 -10   1    1.60    4.50
   9 -10   1   10.50    3.10
 -10  10  -1   11.90    3.50
 -10  10  -1   16.30    2.20
 -10  10  -1   13.30    2.00
 -10  10  -1   16.70    4.80
 -10  10  -1   19.90    5.50
  10 -10   1   12.50    3.60
  10 -10   1   18.30    5.70
  10 -10   1   15.60    3.40
  10 -10   1   19.50    8.10
  10 -10   1   12.30    3.10
 -11  10  -1    7.40    1.10
 -11  10  -1    5.70    3.70
 -11  10  -1    6.90    1.10
  11 -10   1    9.10    3.70
  11 -10   1   13.60    5.10
  11 -10   1   14.80    3.00
  11 -10   1   18.30    4.90
  12 -10   1    1.20    2.70
  12 -10   1    6.00    2.70
  12 -10   1    2.30    3.60
  12 -10   1   15.10    4.60
   7   9  -1   -2.60    2.80
   7   9  -1    5.80    4.90
   7   9  -1    0.90    3.20
   7   9  -1   -3.20    4.30
  -7  -9   1    0.60    4.40
  -7  -9   1   -5.50    2.60
  -7  -9   1    0.10    5.70
  -7  -9   1   11.00    4.40
  -7  -9   1   -1.20    2.30
   6   9  -1    8.80    5.20
   6   9  -1    2.10    2.90
   6   9  -1    8.60    3.60
   6   9  -1    5.90    3.00
   6   9  -1    0.30    4.30
  -6  -9   1    9.60    6.60
  -6  -9   1    8.00    4.50
  -6  -9   1    4.70    2.70
  -6  -9   1    8.20    4.50
  -6  -9   1    8.20    3.20
   5   9  -1    4.90    4.90
   5   9  -1   -1.30    3.70
   5   9  -1    3.40    3.10
   5   9  -1   -1.50    2.80
   5   9  -1    5.20    3.10
  -5  -9   1    0.20    3.30
  -5  -9   1    0.70    4.10
  -5  -9   1    2.10    5.90
  -5  -9   1    1.90    2.60
  -5  -9   1    1.30    2.60
   4   9  -1   13.80    5.60
   4   9  -1   10.70    4.20
   4   9  -1   16.30    3.60
   4   9  -1   22.80    3.90
   4   9  -1   12.60    3.40
  -4  -9   1   20.30    6.60
  -4  -9   1   19.00    3.40
  -4  -9   1   21.00    5.10
  -4  -9   1   19.10    3.40
  -4  -9   1   16.70    4.00
  -4  -9   1   10.60    3.40
   3   9  -1    7.40    3.70
   3   9  -1    0.00    3.00
   3   9  -1   10.10    4.80
   3   9  -1    5.20    2.80
  -3  -9   1   11.50    7.60
  -3  -9   1    9.10    2.80
  -3  -9   1    9.10    3.80
  -3  -9   1    3.60    2.90
  -3  -9   1    5.20    1.40
  -3  -9   1    6.70    3.00
  -3  -9   1    5.10    4.20
   2   9  -1   24.90    3.70
   2   9  -1   21.80    3.40
   2   9  -1   25.00    4.40
   2   9  -1   22.40    6.00
   2   9  -1   19.90    3.70
  -2  -9   1   13.50    2.60
  -2  -9   1   22.60    3.10
  -2  -9   1   25.80    4.20
  -2  -9   1   24.50    6.90
  -2  -9   1   25.10    3.50
  -2  -9   1   24.20    3.60
  -2  -9   1   17.10    4.50
   1   9  -1   69.69    7.40
   1   9  -1   63.09    4.40
   1   9  -1   78.49    6.20
   1   9  -1   76.99    4.90
   1   9  -1   80.89    5.40
  -1  -9   1   74.09    4.90
  -1  -9   1   73.79    4.50
  -1  -9   1   72.79    8.00
  -1  -9   1   76.39    5.70
  -1  -9   1   76.99    6.50
  -1  -9   1   79.99    5.30
   0   9  -1   91.59    7.10
   0   9  -1   97.59    5.00
   0   9  -1   94.89    5.10
   0   9  -1   95.49    5.00
   0   9  -1   99.49    6.50
   0  -9   1   97.09    4.90
   0  -9   1   95.09    8.40
   0  -9   1   92.99    6.70
   0  -9   1   85.89    4.70
   0  -9   1   99.69    5.80
   0  -9   1   95.19    5.10
   0  -9   1   84.69    4.80
  -1   9  -1  104.19    5.10
  -1   9  -1  104.39    5.70
  -1   9  -1   95.89    5.00
  -1   9  -1  106.29    8.10
  -1   9  -1   99.59    6.60
   1  -9   1  105.29    5.80
   1  -9   1  101.29    6.50
   1  -9   1  101.29    5.80
   1  -9   1   92.59    4.90
   1  -9   1   94.09    8.10
   1  -9   1  106.29    5.70
  -2   9  -1   64.79    4.20
  -2   9  -1   66.69    5.80
  -2   9  -1   68.69    7.00
  -2   9  -1   67.59    4.40
  -2   9  -1   72.79    5.00
   2  -9   1   69.49    6.10
   2  -9   1   70.99    4.20
   2  -9   1   64.59    6.20
   2  -9   1   67.99    4.30
   2  -9   1   64.39    5.00
  -3   9  -1   33.50    4.60
  -3   9  -1   34.00    3.50
  -3   9  -1   38.80    6.10
  -3   9  -1   36.50    3.80
  -3   9  -1   33.90    3.60
   3  -9   1   41.90    3.80
   3  -9   1   41.50    5.60
   3  -9   1   37.50    3.40
   3  -9   1   35.10    5.20
  -4   9  -1   45.40    3.70
  -4   9  -1   33.80    4.70
  -4   9  -1   38.80    4.00
  -4   9  -1   32.90    4.90
  -4   9  -1   40.00    4.00
   4  -9   1   27.50    4.20
   4  -9   1   35.00    3.50
   4  -9   1   33.70    3.80
   4  -9   1   36.50    6.10
   4  -9   1   33.60    3.70
  -5   9  -1   59.29    4.20
  -5   9  -1   55.29    6.50
  -5   9  -1   65.09    6.20
  -5   9  -1   62.39    4.30
   5  -9   1   55.09    6.80
   5  -9   1   62.09    4.50
   5  -9   1   43.50    4.30
   5  -9   1   52.09    6.10
   5  -9   1   54.19    4.50
  -6   9  -1   21.10    3.30
  -6   9  -1   23.50    5.70
  -6   9  -1   23.70    3.40
  -6   9  -1   28.20    3.10
   6  -9   1   22.50    5.40
   6  -9   1   20.20    3.20
   6  -9   1   27.20    5.20
   6  -9   1   22.80    3.40
   6  -9   1   19.50    3.20
  -7   9  -1   10.50    4.60
  -7   9  -1    8.20    2.20
  -7   9  -1    6.80    2.30
  -7   9  -1    8.90    2.90
  -7   9  -1    2.70    4.00
   7  -9   1    4.80    4.20
   7  -9   1    8.60    3.40
   7  -9   1    9.00    4.60
   7  -9   1    4.90    2.30
   7  -9   1   11.80    3.10
  -8   9  -1    1.30    4.10
  -8   9  -1    1.10    2.80
  -8   9  -1    5.70    2.00
  -8   9  -1    6.20    2.30
  -8   9  -1    3.40    2.80
   8  -9   1    2.00    4.40
   8  -9   1    4.50    2.90
   8  -9   1    5.10    2.80
   8  -9   1    5.20    4.20
   8  -9   1    9.30    2.90
  -9   9  -1    3.50    1.80
  -9   9  -1    3.00    4.00
  -9   9  -1    8.50    2.10
  -9   9  -1    5.70    3.40
  -9   9  -1    2.50    3.00
   9  -9   1    2.70    2.30
   9  -9   1    2.30    2.60
   9  -9   1    2.90    4.60
   9  -9   1    4.30    3.00
   9  -9   1    9.00    4.40
 -10   9  -1    8.10    1.60
 -10   9  -1    8.90    4.50
 -10   9  -1    7.40    3.00
  10  -9   1   11.50    5.10
  10  -9   1   13.90    2.90
  10  -9   1   15.90    4.40
  10  -9   1   10.90    3.50
  10  -9   1   10.60    2.60
 -11   9  -1   -1.20    3.20
  11  -9   1    2.00    2.60
  11  -9   1    4.30    3.30
  11  -9   1   -4.40    4.60
  11  -9   1    9.00    4.10
  11  -9   1    2.20    2.40
 -12   9  -1    1.90    4.00
  12  -9   1   -0.10    2.50
  12  -9   1   16.70    5.30
  12  -9   1    2.00    2.20
  12  -9   1    2.90    5.00
  12  -9   1   11.60    4.10
  12  -9   1    0.80    3.40
   8   8  -1    8.70    4.90
   8   8  -1   -0.90    2.90
   8   8  -1    1.70    3.10
   8   8  -1   -5.10    2.40
   8   8  -1   -8.10    4.10
  -8  -8   1    2.90    2.60
  -8  -8   1    3.20    5.40
  -8  -8   1   -1.10    3.50
  -8  -8   1   -2.20    2.40
   7   8  -1   -1.90    2.70
   7   8  -1   -4.10    2.70
   7   8  -1   -5.40    4.00
   7   8  -1    7.10    4.70
   7   8  -1   -2.80    2.50
  -7  -8   1    3.50    5.50
  -7  -8   1   -2.20    3.70
  -7  -8   1   -0.30    3.70
  -7  -8   1   -1.70    2.50
  -7  -8   1    1.50    2.60
   6   8  -1    0.60    2.70
   6   8  -1   -1.00    2.50
   6   8  -1   -6.00    3.60
   6   8  -1   -5.50    2.80
   6   8  -1   -1.50    4.30
  -6  -8   1    3.50    2.70
  -6  -8   1    0.20    2.30
  -6  -8   1    0.00    5.30
  -6  -8   1   -1.50    3.90
  -6  -8   1   -4.70    3.10
   5   8  -1    2.80    3.80
   5   8  -1    3.30    2.80
   5   8  -1   11.40    3.10
   5   8  -1    6.40    4.80
   5   8  -1    1.60    3.00
  -5  -8   1    7.20    3.00
  -5  -8   1    6.10    6.40
  -5  -8   1    2.70    3.50
  -5  -8   1    3.40    4.20
  -5  -8   1    7.40    2.70
   4   8  -1   -1.00    2.80
   4   8  -1    0.80    3.20
   4   8  -1   -0.70    2.80
   4   8  -1   -3.70    2.50
   4   8  -1    1.30    7.30
  -4  -8   1   -2.10    3.80
  -4  -8   1   -0.50    2.50
  -4  -8   1   -4.50    4.60
  -4  -8   1    0.80    2.60
  -4  -8   1    1.00    3.00
   3   8  -1   -2.40    2.60
   3   8  -1    1.70    3.20
   3   8  -1    1.70    2.50
   3   8  -1   -2.80    4.40
   3   8  -1   -3.20    1.90
  -3  -8   1    3.40    3.20
  -3  -8   1   -0.50    5.30
  -3  -8   1   -0.60    2.50
  -3  -8   1    4.70    2.10
  -3  -8   1   -2.20    3.70
  -3  -8   1   -3.00    2.40
  -3  -8   1   -1.20    1.20
   2   8  -1   82.79    6.00
   2   8  -1   91.29    5.10
   2   8  -1   72.89    6.40
   2   8  -1   78.09    5.20
   2   8  -1   73.49    6.10
  -2  -8   1   69.79    3.80
  -2  -8   1   76.59    6.50
  -2  -8   1   81.69    5.00
  -2  -8   1   79.79    8.10
  -2  -8   1   84.39    5.00
  -2  -8   1   86.19    5.70
  -2  -8   1   85.79    5.10
   1   8  -1   99.19    4.90
   1   8  -1   91.49    5.40
   1   8  -1   85.99    4.60
   1   8  -1   85.09    7.40
   1   8  -1   88.09    6.20
  -1  -8   1   86.29    4.80
  -1  -8   1  102.39    5.80
  -1  -8   1   92.39    8.10
  -1  -8   1   90.49    4.20
  -1  -8   1   95.99    6.50
  -1  -8   1  100.29    5.30
  -1  -8   1   86.99    5.30
   0   8  -1   75.29    4.40
   0   8  -1   66.49    4.80
   0   8  -1   65.49    4.80
   0   8  -1   67.39    5.40
   0   8  -1   55.99    6.40
   0  -8   1   71.59    4.80
   0  -8   1   65.29    6.10
   0  -8   1   81.29    5.00
   0  -8   1   75.29    5.10
   0  -8   1   66.39    4.20
   0  -8   1   71.49    5.70
  -1   8  -1   31.40    4.20
  -1   8  -1   28.20    3.50
  -1   8  -1   25.60    4.00
  -1   8  -1   28.20    5.40
  -1   8  -1   26.80    2.90
   1  -8   1   26.90    3.50
   1  -8   1   30.80    6.00
   1  -8   1   27.50    3.00
   1  -8   1   28.90    3.00
   1  -8   1   28.10    3.00
   1  -8   1   25.70    4.10
  -2   8  -1  219.78    7.00
  -2   8  -1  219.58   10.20
  -2   8  -1  226.98    7.50
  -2   8  -1  235.88    7.60
  -2   8  -1  221.58    8.70
   2  -8   1  214.68    7.00
   2  -8   1  218.68   10.10
   2  -8   1  216.28    7.40
   2  -8   1  221.08    8.90
   2  -8   1  222.18    7.60
  -3   8  -1   82.99    6.80
  -3   8  -1   89.19    4.40
  -3   8  -1   89.29    5.80
  -3   8  -1   79.19    4.70
  -3   8  -1   87.59    4.70
   3  -8   1   85.39    4.40
   3  -8   1   84.59    7.10
   3  -8   1   87.39    4.90
   3  -8   1   85.19    4.20
   3  -8   1   84.69    5.90
  -4   8  -1  107.49    4.90
  -4   8  -1   99.69    4.80
  -4   8  -1  109.19    6.50
  -4   8  -1  110.09    4.80
  -4   8  -1  100.99    7.40
   4  -8   1  101.09    7.40
   4  -8   1  109.49    5.00
   4  -8   1  111.59    6.90
   4  -8   1   96.79    5.10
   4  -8   1  104.29    5.10
  -5   8  -1   13.70    2.50
  -5   8  -1   12.30    2.70
  -5   8  -1   20.60    4.90
  -5   8  -1   16.40    2.70
  -5   8  -1   17.30    4.20
   5  -8   1   20.60    3.00
   5  -8   1   20.10    2.90
   5  -8   1   18.20    2.90
   5  -8   1   19.20    3.90
   5  -8   1   22.70    5.30
  -6   8  -1  106.79    5.00
  -6   8  -1  107.89    7.50
  -6   8  -1  112.29    4.90
  -6   8  -1  100.89    5.20
  -6   8  -1  106.99    6.70
   6  -8   1  105.19    5.10
   6  -8   1  102.89    5.40
   6  -8   1  105.69    5.00
   6  -8   1   99.29    7.50
   6  -8   1  107.09    7.60
  -7   8  -1   26.40    3.60
  -7   8  -1   17.50    4.10
  -7   8  -1   25.30    4.50
  -7   8  -1   34.40    5.70
   7  -8   1   32.00    9.40
   7  -8   1   24.90    3.50
   7  -8   1   29.10    3.10
   7  -8   1   25.20    3.10
   7  -8   1   33.00    5.60
  -8   8  -1   27.50    5.50
  -8   8  -1   22.70    2.40
  -8   8  -1   20.90    2.50
  -8   8  -1   25.80    3.60
  -8   8  -1   17.80    4.50
   8  -8   1   25.60    5.10
   8  -8   1   20.90    2.80
   8  -8   1   19.60    3.60
   8  -8   1   22.60    4.70
   8  -8   1   24.50    3.10
  -9   8  -1    5.90    3.20
  -9   8  -1    6.20    1.60
  -9   8  -1   10.30    2.00
  -9   8  -1    6.10    3.60
   9  -8   1    9.90    2.60
   9  -8   1    2.80    3.60
   9  -8   1    3.40    3.00
   9  -8   1    7.10    4.00
 -10   8  -1   -3.30    3.80
 -10   8  -1    1.30    1.00
  10  -8   1    0.40    4.30
  10  -8   1    7.90    3.80
  10  -8   1    0.20    2.90
  10  -8   1    3.60    2.40
  10  -8   1    1.80    2.20
 -11   8  -1   -1.50    3.50
  11  -8   1    0.90    3.20
  11  -8   1   -1.20    2.40
  11  -8   1    0.10    2.30
  11  -8   1    4.80    3.50
  11  -8   1    7.60    4.80
  11  -8   1   -0.90    4.10
 -12   8  -1   -0.60    4.50
  12  -8   1    7.80    4.80
  12  -8   1   -1.70    3.20
  12  -8   1    0.80    2.70
  12  -8   1   11.00    3.60
  12  -8   1    6.50    2.30
  12  -8   1    1.20    4.90
   9   7  -1   -1.90    3.30
   9   7  -1    0.30    2.80
   9   7  -1    9.10    4.60
   9   7  -1   -8.90    4.60
   9   7  -1    2.90    5.00
  -9  -7   1    3.30    2.60
  -9  -7   1    6.30    3.90
  -9  -7   1   20.30    6.40
   8   7  -1    5.10    4.80
   8   7  -1   13.20    3.00
   8   7  -1    2.50    3.10
   8   7  -1   10.90    4.80
   8   7  -1    9.80    3.20
  -8  -7   1    6.80    2.40
  -8  -7   1   16.20    4.90
  -8  -7   1   10.40    5.60
  -8  -7   1    7.20    3.80
   7   7  -1    7.70    2.70
   7   7  -1    0.90    2.60
   7   7  -1   -1.30    2.90
   7   7  -1    9.90    4.70
   7   7  -1   -3.30    3.80
  -7  -7   1   -0.30    2.30
  -7  -7   1    2.40    3.90
  -7  -7   1   -0.50    5.00
  -7  -7   1    2.10    2.30
  -7  -7   1    4.20    3.30
   6   7  -1   -2.70    2.80
   6   7  -1    3.50    4.60
   6   7  -1    2.00    2.50
   6   7  -1    0.00    3.60
   6   7  -1    3.40    2.60
  -6  -7   1    1.30    5.20
  -6  -7   1    5.60    2.30
  -6  -7   1    3.60    3.30
  -6  -7   1   -0.80    3.70
  -6  -7   1    3.90    2.60
   5   7  -1    3.40    3.50
   5   7  -1    0.50    2.60
   5   7  -1    2.70    4.70
   5   7  -1    0.50    2.90
  -5  -7   1    0.10    2.20
  -5  -7   1    4.70    4.10
  -5  -7   1    6.70    5.60
  -5  -7   1    3.50    2.30
  -5  -7   1    6.90    3.10
   4   7  -1    1.90    3.40
   4   7  -1    1.90    2.80
   4   7  -1   -1.80    2.50
   4   7  -1    1.50    4.40
   4   7  -1   -0.40    2.60
  -4  -7   1   -1.70    3.60
  -4  -7   1    1.60    2.70
  -4  -7   1   -3.00    2.30
  -4  -7   1    2.40    5.30
  -4  -7   1    2.10    2.70
  -4  -7   1   -1.90    3.00
   3   7  -1    3.40    4.80
   3   7  -1    4.30    2.70
   3   7  -1    6.60    3.40
   3   7  -1    4.40    2.70
   3   7  -1    5.90    2.90
  -3  -7   1    5.60    3.20
  -3  -7   1    5.70    2.40
  -3  -7   1    5.20    3.90
  -3  -7   1    5.10    2.70
  -3  -7   1    5.90    1.30
  -3  -7   1    6.20    2.60
  -3  -7   1    4.80    5.50
   2   7  -1   39.20    5.00
   2   7  -1   38.10    3.80
   2   7  -1   39.10    4.10
   2   7  -1   38.90    5.90
   2   7  -1   49.00    4.10
  -2  -7   1   37.20    4.00
  -2  -7   1   38.90    3.80
  -2  -7   1   47.20    6.80
  -2  -7   1   40.50    3.90
  -2  -7   1   39.10    4.00
  -2  -7   1   33.40    2.80
  -2  -7   1   40.70    5.60
   1   7  -1   42.80    3.40
   1   7  -1   47.80    4.60
   1   7  -1   43.50    6.00
   1   7  -1   38.60    3.30
   1   7  -1   47.60    3.70
  -1  -7   1   46.40    3.70
  -1  -7   1   41.90    3.00
  -1  -7   1   43.30    6.00
  -1  -7   1   43.60    4.20
  -1  -7   1   41.10    4.80
  -1  -7   1   48.80    3.90
  -1  -7   1   44.60    4.00
   0   7  -1   13.20    2.80
   0   7  -1   16.60    4.80
   0   7  -1   11.90    3.10
   0   7  -1   14.70    2.90
   0   7  -1   15.40    2.40
   0  -7   1   16.30    4.50
   0  -7   1   17.90    3.20
   0  -7   1   22.70    4.90
   0  -7   1   14.90    2.80
   0  -7   1   15.30    2.90
   0  -7   1   13.20    2.40
  -1   7  -1  298.67   11.00
  -1   7  -1  294.37    8.70
  -1   7  -1  305.37    8.40
  -1   7  -1  296.87    8.50
  -1   7  -1  297.97    9.70
   1  -7   1  295.97    9.80
   1  -7   1  295.47   11.30
   1  -7   1  309.87    8.80
   1  -7   1  314.97    8.50
   1  -7   1  307.27    9.70
  -2   7  -1   57.79    3.80
  -2   7  -1   50.69    4.80
  -2   7  -1   57.49    3.40
  -2   7  -1   50.79    4.50
  -2   7  -1   49.70    3.20
   2  -7   1   52.69    3.40
   2  -7   1   52.69    5.70
   2  -7   1   57.89    3.90
   2  -7   1   60.49    4.50
   2  -7   1   50.89    3.70
  -3   7  -1   54.39    3.70
  -3   7  -1   51.29    5.50
  -3   7  -1   50.99    4.10
  -3   7  -1   48.30    3.60
  -3   7  -1   55.89    3.50
   3  -7   1   51.19    3.80
   3  -7   1   56.39    5.50
   3  -7   1   56.99    3.60
   3  -7   1   56.69    4.80
   3  -7   1   49.00    3.10
  -4   7  -1  169.58    5.90
  -4   7  -1  178.98    8.40
  -4   7  -1  178.88    7.80
  -4   7  -1  187.78    6.20
   4  -7   1  166.88    5.60
   4  -7   1  174.48    6.10
   4  -7   1  166.28    7.60
   4  -7   1  162.28    5.60
   4  -7   1  176.18    8.40
  -5   7  -1   70.39    4.30
  -5   7  -1   76.09    6.20
  -5   7  -1   73.69    3.90
  -5   7  -1   70.39    5.10
  -5   7  -1   71.79    4.10
   5  -7   1   70.89    6.00
   5  -7   1   76.69    4.50
   5  -7   1   78.29    6.00
   5  -7   1   76.89    4.10
   5  -7   1   71.89    4.10
  -6   7  -1  218.58    7.60
  -6   7  -1  236.68    6.90
  -6   7  -1  235.38    6.90
  -6   7  -1  231.78    9.90
  -6   7  -1  223.18    9.00
   6  -7   1  238.68   10.10
   6  -7   1  231.98    9.80
   6  -7   1  233.38    7.90
   6  -7   1  223.58    7.10
   6  -7   1  215.98    7.00
  -7   7  -1   39.40    3.10
  -7   7  -1   31.50    3.10
  -7   7  -1   33.20    4.70
  -7   7  -1   39.20    5.30
  -7   7  -1   42.00    4.20
   7  -7   1   40.60    3.40
   7  -7   1   39.50    3.40
   7  -7   1   36.80    3.80
   7  -7   1   34.50    5.40
   7  -7   1   32.90    5.00
  -8   7  -1   38.70    4.00
  -8   7  -1   44.90    3.20
  -8   7  -1   47.80    5.90
  -8   7  -1   49.80    3.20
  -8   7  -1   43.90    8.60
   8  -7   1   45.50    6.30
   8  -7   1   48.90    3.90
   8  -7   1   44.00    4.10
   8  -7   1   42.60    5.40
   8  -7   1   53.69    4.70
  -9   7  -1   67.39    6.60
   9  -7   1   71.19    4.10
   9  -7   1   67.39    7.40
   9  -7   1   70.99    5.70
   9  -7   1   65.79    5.80
   9  -7   1   70.39    4.20
 -10   7  -1    8.20    4.20
  10  -7   1   12.10    4.70
  10  -7   1   18.00    4.20
  10  -7   1   14.60    3.60
  10  -7   1   15.10    2.70
  10  -7   1   15.50    2.50
  10  -7   1   14.30    4.40
 -11   7  -1    3.70    4.30
  11  -7   1    5.40    2.20
  11  -7   1    3.60    2.30
  11  -7   1    8.80    3.60
  11  -7   1    9.70    4.70
  11  -7   1   10.60    5.10
  11  -7   1    6.80    3.20
 -12   7  -1   -2.80    4.20
  12  -7   1    6.50    3.70
  12  -7   1    7.50    4.00
  12  -7   1   13.10    3.50
  12  -7   1    9.00    5.10
  12  -7   1    2.10    2.10
   9   6  -1   -7.30    4.50
   9   6  -1    9.60    3.80
   9   6  -1   10.10    4.80
   9   6  -1    6.80    2.80
  -9  -6   1   21.10    6.00
  -9  -6   1   15.50    4.30
  -9  -6   1    9.00    4.00
  -9  -6   1    2.80    2.10
   8   6  -1   23.60    4.30
   8   6  -1   19.50    5.30
   8   6  -1   17.30    5.10
   8   6  -1   17.20    3.00
   8   6  -1   23.60    4.00
  -8  -6   1   19.70    5.10
  -8  -6   1   30.70    7.80
  -8  -6   1   20.60    2.60
  -8  -6   1   17.40    2.70
  -8  -6   1   12.50    6.90
   7   6  -1   11.50    3.50
   7   6  -1   14.90    2.80
   7   6  -1   17.40    3.30
   7   6  -1   19.60    6.70
   7   6  -1   13.70    5.40
  -7  -6   1   18.90    6.10
  -7  -6   1   14.10    2.60
  -7  -6   1   14.00    4.70
  -7  -6   1   13.30    2.50
  -7  -6   1   15.40    3.70
   6   6  -1    9.60    3.20
   6   6  -1   14.60    4.20
   6   6  -1   15.40    2.90
   6   6  -1   15.10    3.00
   6   6  -1   18.30    5.30
  -6  -6   1   16.60    4.70
  -6  -6   1   20.80    6.10
  -6  -6   1   12.20    3.50
  -6  -6   1   11.80    2.60
   5   6  -1   14.20    5.00
   5   6  -1   11.70    3.10
   5   6  -1   13.70    3.90
   5   6  -1   12.20    2.80
   5   6  -1   11.40    2.90
  -5  -6   1    7.60    4.20
  -5  -6   1   12.50    3.40
  -5  -6   1   10.70    2.50
  -5  -6   1   10.30    5.50
   4   6  -1    3.00    4.40
   4   6  -1    7.00    2.80
   4   6  -1    2.10    3.20
   4   6  -1    8.90    2.70
   4   6  -1    4.80    2.40
  -4  -6   1    4.90    2.30
  -4  -6   1    2.20    2.40
  -4  -6   1    1.80    3.00
  -4  -6   1    2.10    3.70
  -4  -6   1    7.30    5.20
  -4  -6   1    1.80    2.10
   3   6  -1   12.80    2.70
   3   6  -1   13.00    2.80
   3   6  -1   15.00    4.90
   3   6  -1   11.40    2.60
   3   6  -1   12.90    3.40
  -3  -6   1   15.70    1.40
  -3  -6   1   11.80    2.80
  -3  -6   1   12.00    3.90
  -3  -6   1   13.20    3.30
  -3  -6   1   17.00    5.40
  -3  -6   1   12.10    2.60
   2   6  -1    0.00    2.00
   2   6  -1   -4.70    2.10
   2   6  -1   -5.50    3.70
   2   6  -1    0.40    2.20
   2   6  -1   -2.00    2.50
  -2  -6   1   -0.30    1.90
  -2  -6   1   -3.40    1.90
  -2  -6   1    0.00    4.30
  -2  -6   1   -0.80    2.90
  -2  -6   1   -4.40    1.40
  -2  -6   1    1.00    2.40
  -2  -6   1   -2.30    1.50
   1   6  -1    4.90    1.80
   1   6  -1    7.90    3.70
   1   6  -1   10.40    2.40
   1   6  -1    7.70    2.50
   1   6  -1    4.00    1.90
  -1  -6   1    7.20    2.10
  -1  -6   1    5.00    2.20
  -1  -6   1    5.70    2.10
  -1  -6   1    6.30    2.10
  -1  -6   1    8.00    2.70
  -1  -6   1   10.40    1.80
  -1  -6   1    7.10    3.80
   0   6  -1    4.30    1.60
   0   6  -1   -1.00    3.20
   0   6  -1    3.60    2.20
   0   6  -1    5.20    1.70
   0   6  -1    1.80    1.80
   0  -6   1    4.10    1.60
   0  -6   1    4.10    2.30
   0  -6   1    3.50    1.60
   0  -6   1    3.10    1.90
   0  -6   1    3.60    1.60
   0  -6   1    5.60    3.80
  -1   6  -1   25.60    2.40
  -1   6  -1   27.30    4.40
  -1   6  -1   26.40    3.40
  -1   6  -1   26.30    2.70
  -1   6  -1   28.50    2.60
   1  -6   1   25.80    2.70
   1  -6   1   27.10    4.30
   1  -6   1   30.10    2.50
   1  -6   1   31.90    3.50
   1  -6   1   23.00    2.30
  -2   6  -1  279.37   10.00
  -2   6  -1  278.87    7.80
  -2   6  -1  283.07    7.80
  -2   6  -1  280.07    8.90
  -2   6  -1  278.07    7.50
   2  -6   1  281.47    7.80
   2  -6   1  287.27    7.90
   2  -6   1  272.67    9.60
   2  -6   1  271.77    8.60
   2  -6   1  286.57    7.60
  -3   6  -1    1.30    2.50
  -3   6  -1   -0.20    2.60
  -3   6  -1    0.20    1.70
  -3   6  -1   -1.70    1.50
  -3   6  -1    0.20    1.20
   3  -6   1    1.50    1.80
   3  -6   1    0.30    2.40
   3  -6   1   -1.00    1.80
   3  -6   1    0.00    2.40
   3  -6   1    1.70    1.60
  -4   6  -1    8.20    3.00
  -4   6  -1   10.80    2.70
  -4   6  -1   14.70    2.30
  -4   6  -1   12.20    3.70
  -4   6  -1   10.70    2.00
  -4   6  -1    7.70    1.90
   4  -6   1   15.10    3.80
   4  -6   1   16.20    2.40
   4  -6   1   13.70    3.30
   4  -6   1   10.70    2.10
   4  -6   1   10.80    1.80
  -5   6  -1  279.57    7.70
  -5   6  -1  284.97   10.40
  -5   6  -1  286.87    8.50
  -5   6  -1  303.47    9.70
  -5   6  -1  289.17    7.70
   5  -6   1  297.67   10.50
   5  -6   1  302.07   10.50
   5  -6   1  290.37    8.00
   5  -6   1  286.47    8.00
   5  -6   1  301.07    8.60
  -6   6  -1   37.30    4.90
  -6   6  -1   34.10    2.90
  -6   6  -1   40.30    2.80
  -6   6  -1   30.80    4.10
  -6   6  -1   40.20    3.80
   6  -6   1   38.30    3.90
   6  -6   1   38.70    3.40
   6  -6   1   35.70    3.40
   6  -6   1   37.50    4.90
   6  -6   1   35.00    4.90
  -7   6  -1  163.48    6.60
  -7   6  -1  162.78    4.90
  -7   6  -1  161.58    7.90
  -7   6  -1  160.88    8.20
  -7   6  -1  170.58    5.10
   7  -6   1  163.28    5.70
   7  -6   1  154.88    7.70
   7  -6   1  166.48    6.90
   7  -6   1  170.58    9.00
   7  -6   1  168.48    5.50
  -8   6  -1   87.39    5.30
  -8   6  -1   79.49    3.00
  -8   6  -1   70.99    6.20
   8  -6   1   83.39    9.30
   8  -6   1   90.69    6.20
   8  -6   1   76.49    6.50
   8  -6   1   91.39    5.50
   8  -6   1   83.09    4.20
  -9   6  -1   30.50    5.30
   9  -6   1   31.10    5.40
   9  -6   1   33.60    3.20
   9  -6   1   21.30    6.10
   9  -6   1   30.30    4.20
   9  -6   1   33.70    3.40
 -10   6  -1    8.50    4.30
  10  -6   1   13.20    5.10
  10  -6   1   25.60    4.40
  10  -6   1   18.30    3.70
  10  -6   1   12.80    2.30
  10  -6   1   14.20    2.50
  10  -6   1   16.40    4.50
 -11   6  -1   10.50    4.50
  11  -6   1   17.60    4.00
  11  -6   1   17.80    2.70
  11  -6   1   14.50    5.30
  11  -6   1   18.00    5.30
  11  -6   1   20.90    2.50
  11  -6   1   21.60    4.00
 -12   6  -1    5.00    4.30
  12  -6   1    7.20    5.10
  12  -6   1    8.90    4.00
  12  -6   1   10.00    3.60
  12  -6   1    7.30    2.10
  12  -6   1    2.40    2.20
  12  -6   1   12.50    8.50
  12  -6   1   16.20    3.50
  10   5  -1   13.00    2.60
  10   5  -1    1.30    5.10
  10   5  -1   10.60    3.70
  10   5  -1    8.80    2.40
  10   5  -1   18.70    5.30
 -10  -5   1    8.30    0.80
 -10  -5   1   13.90    4.50
   9   5  -1   15.30    2.70
   9   5  -1   20.20    5.20
   9   5  -1    8.70    4.90
   9   5  -1    8.40    3.50
   9   5  -1   15.50    3.00
  -9  -5   1   17.10    5.30
  -9  -5   1   18.30    4.80
  -9  -5   1   11.40    2.00
   8   5  -1   29.50    3.30
   8   5  -1   35.30    6.00
   8   5  -1   41.00    4.00
   8   5  -1   27.60    4.00
   8   5  -1   25.80    5.40
  -8  -5   1   35.90    6.60
  -8  -5   1   25.60    2.70
  -8  -5   1   21.50    2.50
  -8  -5   1   26.50    4.30
  -8  -5   1   39.10    5.90
   7   5  -1   30.60    3.20
   7   5  -1   22.50    3.60
   7   5  -1   31.30    5.20
   7   5  -1   33.50    3.60
   7   5  -1   33.10    5.90
  -7  -5   1   37.80    6.70
  -7  -5   1   35.60    3.20
  -7  -5   1   29.50    4.30
  -7  -5   1   34.00    3.30
  -7  -5   1   42.10    7.00
   6   5  -1   12.50    3.30
   6   5  -1   14.90    4.20
   6   5  -1   10.80    2.60
   6   5  -1   11.30    4.80
   6   5  -1    8.60    2.50
  -6  -5   1   18.70    4.60
  -6  -5   1   14.80    5.50
  -6  -5   1   12.70    2.30
  -6  -5   1    9.50    2.30
  -6  -5   1   11.90    3.40
   5   5  -1   35.50    3.50
   5   5  -1   42.90    5.90
   5   5  -1   35.60    4.70
   5   5  -1   38.40    4.00
   5   5  -1   30.20    3.50
  -5  -5   1   34.80    3.50
  -5  -5   1   41.50    6.60
  -5  -5   1   37.10    3.50
  -5  -5   1   39.30    4.40
  -5  -5   1   37.10    5.20
   4   5  -1   94.59    6.80
   4   5  -1   99.69    5.10
   4   5  -1  102.09    6.10
   4   5  -1  100.49    4.60
   4   5  -1  100.79    4.60
  -4  -5   1   98.49    7.40
  -4  -5   1   97.49    4.70
  -4  -5   1   94.19    6.90
  -4  -5   1   91.19    5.30
  -4  -5   1   98.79    4.30
   3   5  -1   36.90    2.90
   3   5  -1   38.70    4.10
   3   5  -1   27.40    2.80
   3   5  -1   32.30    3.20
   3   5  -1   34.40    4.70
  -3  -5   1   31.90    1.50
  -3  -5   1   32.50    4.20
  -3  -5   1   31.00    3.00
  -3  -5   1   32.90    2.80
  -3  -5   1   35.30    5.40
  -3  -5   1   33.90    3.60
   2   5  -1   58.79    3.50
   2   5  -1   54.99    3.00
   2   5  -1   63.89    4.30
   2   5  -1   61.39    5.20
   2   5  -1   53.59    3.40
  -2  -5   1   55.09    3.30
  -2  -5   1   55.59    3.60
  -2  -5   1   55.49    3.40
  -2  -5   1   64.19    5.50
  -2  -5   1   49.40    2.40
  -2  -5   1   57.79    4.40
  -2  -5   1   60.49    3.40
   1   5  -1  121.49    4.30
   1   5  -1  123.19    5.20
   1   5  -1  123.79    4.50
   1   5  -1  116.19    4.50
   1   5  -1  115.49    6.30
  -1  -5   1  123.89    4.50
  -1  -5   1  125.79    4.60
  -1  -5   1  121.89    3.90
  -1  -5   1  118.09    5.20
  -1  -5   1  122.19    6.40
  -1  -5   1  119.59    4.60
  -1  -5   1  120.99    4.50
   0   5  -1    9.20    2.00
   0   5  -1    8.40    1.90
   0   5  -1    9.00    2.70
   0   5  -1    9.70    1.70
   0   5  -1    7.60    2.10
   0  -5   1   11.80    1.70
   0  -5   1    9.00    3.50
   0  -5   1    9.50    2.20
   0  -5   1    9.90    1.80
   0  -5   1    8.10    1.70
   0  -5   1   10.30    3.00
  -1   5  -1  184.98    6.90
  -1   5  -1  197.28    7.60
  -1   5  -1  196.68    6.80
  -1   5  -1  200.68    5.90
   1  -5   1  194.18    5.60
   1  -5   1  192.58    5.60
   1  -5   1  199.48    5.90
   1  -5   1  198.48    7.30
   1  -5   1  200.68    6.60
  -2   5  -1    6.20    1.70
  -2   5  -1    6.80    1.90
  -2   5  -1    9.20    2.80
  -2   5  -1    8.40    1.80
   2  -5   1    9.00    1.50
   2  -5   1    6.50    1.80
   2  -5   1    8.50    2.30
   2  -5   1   10.60    3.00
   2  -5   1    6.90    1.60
  -3   5  -1  162.28    5.70
  -3   5  -1  157.18    6.60
  -3   5  -1  153.08    5.80
  -3   5  -1  153.08    4.90
  -3   5  -1  150.58    4.60
   3  -5   1  157.18    6.30
   3  -5   1  155.78    6.60
   3  -5   1  150.78    5.00
   3  -5   1  158.58    4.90
   3  -5   1  157.08    4.90
  -4   5  -1   40.30    2.90
  -4   5  -1   37.10    2.70
  -4   5  -1   38.10    4.10
  -4   5  -1   34.80    3.50
  -4   5  -1   39.40    2.50
   4  -5   1   39.70    4.00
   4  -5   1   42.00    2.70
   4  -5   1   37.30    3.00
   4  -5   1   40.80    4.20
   4  -5   1   38.50    2.60
  -5   5  -1   18.50    2.50
  -5   5  -1   17.30    1.80
  -5   5  -1   12.00    2.80
  -5   5  -1   15.00    1.60
  -5   5  -1   17.20    3.60
   5  -5   1   12.70    1.80
   5  -5   1   16.40    3.80
   5  -5   1   12.80    3.30
   5  -5   1   15.10    2.00
   5  -5   1   15.20    2.30
  -6   5  -1   20.60    3.70
  -6   5  -1   27.30    4.40
  -6   5  -1   24.20    2.30
  -6   5  -1   22.40    2.10
  -6   5  -1   26.00    3.10
   6  -5   1   25.60    2.50
   6  -5   1   24.60    4.00
   6  -5   1   28.30    3.10
   6  -5   1   25.50    2.40
   6  -5   1   24.00    4.40
  -7   5  -1    6.00    1.30
  -7   5  -1    5.20    2.50
  -7   5  -1    0.20    3.20
   7  -5   1    3.90    3.10
   7  -5   1   -1.20    4.00
   7  -5   1    6.60    2.40
   7  -5   1    4.60    2.50
   7  -5   1    8.40    2.00
  -8   5  -1   40.20    5.10
  -8   5  -1   43.40    1.70
  -8   5  -1   47.00    1.80
   8  -5   1   49.40    3.30
   8  -5   1   47.00    4.80
   8  -5   1   45.00    6.00
   8  -5   1   44.10    4.60
   8  -5   1   49.20    3.30
  -9   5  -1   30.40    4.90
   9  -5   1   34.20    3.00
   9  -5   1   32.90    4.20
   9  -5   1   26.80    5.80
   9  -5   1   34.80    5.40
   9  -5   1   38.60    3.30
   9  -5   1   33.40    5.70
 -10   5  -1    7.90    4.20
  10  -5   1   19.60    3.90
  10  -5   1   14.40    2.20
  10  -5   1   21.30    5.30
  10  -5   1   11.60    3.50
  10  -5   1   17.10    4.50
  10  -5   1   17.60    5.00
  10  -5   1   17.50    2.60
 -11   5  -1    2.70    4.10
  11  -5   1    9.30    3.60
  11  -5   1   16.90    3.70
  11  -5   1   13.60    2.40
  11  -5   1   13.10    2.20
  11  -5   1   15.90    5.20
  11  -5   1   15.10    4.10
  11  -5   1   12.40    5.00
 -12   5  -1    3.20    4.50
  12  -5   1    4.70    3.20
  12  -5   1   11.00    7.90
  12  -5   1    7.20    2.10
  12  -5   1   12.80    2.40
  12  -5   1   16.40    3.40
  12  -5   1    9.70    3.80
  12  -5   1   16.30    5.70
  10   4  -1    1.90    3.70
  10   4  -1    6.20    4.50
  10   4  -1    8.20    2.50
  10   4  -1   -6.60    4.60
 -10  -4   1    3.70    3.60
   9   4  -1    9.00    4.80
   9   4  -1   19.10    2.90
   9   4  -1   13.70    2.70
   9   4  -1   11.70    3.70
   9   4  -1   13.20    4.80
  -9  -4   1   18.00    4.30
  -9  -4   1   10.20    1.70
   8   4  -1   33.10    3.90
   8   4  -1   33.90    5.80
   8   4  -1   34.60    7.70
   8   4  -1   40.50    3.70
  -8  -4   1   33.40    2.70
  -8  -4   1   37.70    5.60
  -8  -4   1   31.80    4.50
  -8  -4   1   40.40    6.50
   7   4  -1   75.99    7.20
   7   4  -1   86.39    5.20
   7   4  -1   76.09    6.90
   7   4  -1   81.89    4.50
   7   4  -1   71.49    4.70
  -7  -4   1   70.59    5.80
  -7  -4   1   71.39    3.90
  -7  -4   1   76.39    3.60
  -7  -4   1   84.99    7.50
  -7  -4   1   81.89    7.00
   6   4  -1   30.70    3.60
   6   4  -1   24.90    2.80
   6   4  -1   26.40    4.70
   6   4  -1   32.60    5.40
   6   4  -1   23.80    3.00
  -6  -4   1   18.50    4.40
  -6  -4   1   25.20    2.60
  -6  -4   1   25.80    2.50
  -6  -4   1   33.80    4.20
  -6  -4   1   28.90    5.90
   5   4  -1  125.59    5.10
   5   4  -1  130.79    4.90
   5   4  -1  123.99    5.80
   5   4  -1  119.49    7.20
   5   4  -1  128.49    7.00
  -5  -4   1  127.99    7.80
  -5  -4   1  126.89    7.30
  -5  -4   1  134.39    6.40
  -5  -4   1  126.59    4.80
  -5  -4   1  123.09    4.50
   4   4  -1  140.89    6.50
   4   4  -1  142.09    5.60
   4   4  -1  135.69    7.20
   4   4  -1  129.89    4.90
   4   4  -1  138.09    5.20
  -4  -4   1  143.89    7.20
  -4  -4   1  129.39    3.10
  -4  -4   1  141.09    4.90
  -4  -4   1  137.49    4.90
  -4  -4   1  146.69    7.80
  -4  -4   1  141.99    6.00
   3   4  -1  145.19    5.20
   3   4  -1  138.19    6.70
   3   4  -1  139.19    5.90
   3   4  -1  142.99    4.80
   3   4  -1  144.39    4.80
  -3  -4   1  137.99    5.20
  -3  -4   1  134.99    5.40
  -3  -4   1  139.79    4.60
  -3  -4   1  139.99    7.10
  -3  -4   1  143.39    4.70
  -3  -4   1  138.19    6.30
   2   4  -1  163.28    6.70
   2   4  -1  159.48    5.20
   2   4  -1  157.48    5.00
   2   4  -1  153.68    5.00
   2   4  -1  167.68    6.90
  -2  -4   1  149.29    4.10
  -2  -4   1  159.78    5.40
  -2  -4   1  159.48    5.20
  -2  -4   1  154.38    4.90
  -2  -4   1  168.48    6.20
  -2  -4   1  165.08    7.20
   1   4  -1  136.39    4.20
   1   4  -1  126.39    5.80
   1   4  -1  128.69    4.10
   1   4  -1  129.29    4.10
   1   4  -1  126.09    4.80
  -1  -4   1  125.79    3.70
  -1  -4   1  124.99    6.00
  -1  -4   1  126.09    4.10
  -1  -4   1  129.29    4.40
  -1  -4   1  126.69    4.90
  -1  -4   1  133.79    4.40
  -1  -4   1  129.79    4.40
   0  -4   1 1213.78   26.10
  -1   4  -1    8.60    2.80
  -1   4  -1   12.10    1.90
  -1   4  -1    7.80    2.40
  -1   4  -1    9.60    1.90
   1  -4   1   10.20    1.80
   1  -4   1   11.70    1.90
   1  -4   1   15.60    3.10
   1  -4   1    9.10    1.90
   1  -4   1   14.10    3.30
  -2   4  -1   76.39    3.20
  -2   4  -1   79.09    4.00
  -2   4  -1   80.49    3.60
  -2   4  -1   75.99    4.40
  -2   4  -1   80.69    4.40
  -2   4  -1   79.89    3.20
   2  -4   1   79.59    3.00
   2  -4   1   76.19    3.40
   2  -4   1   85.09    4.30
   2  -4   1   75.49    4.40
  -3   4  -1   98.79    4.70
  -3   4  -1   91.69    3.60
  -3   4  -1   89.69    3.30
  -3   4  -1   94.49    4.20
  -3   4  -1   94.09    3.30
   3  -4   1   93.79    3.40
   3  -4   1   94.49    4.70
   3  -4   1   94.99    3.70
   3  -4   1   96.39    4.80
   3  -4   1   92.59    3.40
  -4   4  -1   26.30    2.60
  -4   4  -1   26.70    3.10
  -4   4  -1   28.60    3.40
  -4   4  -1   24.80    2.20
  -4   4  -1   24.60    2.00
   4  -4   1   27.10    2.10
   4  -4   1   28.40    2.80
   4  -4   1   26.30    2.30
   4  -4   1   25.70    3.00
   4  -4   1   25.00    3.30
  -5   4  -1    9.40    2.20
  -5   4  -1    7.20    2.90
  -5   4  -1    9.00    1.50
  -5   4  -1    6.50    2.50
  -5   4  -1    9.50    1.30
   5  -4   1   10.30    1.70
   5  -4   1    6.00    3.10
   5  -4   1    8.50    2.00
   5  -4   1   10.50    1.70
   5  -4   1    9.10    2.70
  -6   4  -1    0.90    2.30
  -6   4  -1   -1.20    2.70
  -6   4  -1   -0.70    1.10
   6  -4   1    2.30    1.50
   6  -4   1    2.40    2.40
   6  -4   1    1.20    1.60
   6  -4   1   -2.60    2.40
   6  -4   1   -0.30    3.00
  -7   4  -1   41.90    4.20
  -7   4  -1   43.70    2.00
  -7   4  -1   40.80    1.80
   7  -4   1   42.20    4.20
   7  -4   1   39.60    2.80
   7  -4   1   43.80    2.90
   7  -4   1   38.30    4.20
  -8   4  -1   -0.20    3.10
   8  -4   1    2.20    1.70
   8  -4   1    1.70    2.60
   8  -4   1   -0.10    4.10
   8  -4   1    3.20    1.80
   8  -4   1    7.00    3.10
  -9   4  -1   28.30    5.00
   9  -4   1   28.20    4.60
   9  -4   1   22.80    8.70
   9  -4   1   26.30    2.60
   9  -4   1   34.50    4.30
   9  -4   1   26.20    3.70
 -10   4  -1   11.60    4.50
  10  -4   1   15.60    4.10
  10  -4   1   21.10    3.80
  10  -4   1    9.20    2.00
  10  -4   1   11.50    5.00
  10  -4   1   14.40    2.20
  10  -4   1   12.80    3.40
 -11   4  -1    6.20    3.20
  11  -4   1   10.30    2.10
  11  -4   1   13.40    3.80
  11  -4   1    9.70    3.70
  11  -4   1   11.10    5.10
  11  -4   1   11.20    2.20
  11  -4   1   12.20    3.30
 -12   4  -1   -2.30    4.10
  12  -4   1    3.10    3.20
  12  -4   1    0.50    1.70
  12  -4   1   -4.60    2.40
  12  -4   1   11.10    5.50
  12  -4   1    5.20    2.50
  12  -4   1   -3.70    2.90
  11   3  -1    4.80    3.70
  11   3  -1   -0.40    5.30
  11   3  -1    5.10    4.60
  11   3  -1    3.20    2.20
  11   3  -1   -0.80    2.10
  11   3  -1    7.00    3.20
 -11  -3   1    3.40    4.00
  10   3  -1   -0.30    2.00
  10   3  -1    3.70    4.10
  10   3  -1    3.80    4.70
  10   3  -1    1.90    2.30
  10   3  -1    0.30    2.40
 -10  -3   1    0.40    3.10
   9   3  -1    8.90    3.30
   9   3  -1    8.50    2.30
   9   3  -1    4.40    4.20
   9   3  -1    6.10    2.20
   9   3  -1   10.90    4.70
  -9  -3   1    9.70    4.30
   8   3  -1    9.40    2.80
   8   3  -1   10.60    4.50
   8   3  -1   10.10    2.30
   8   3  -1    9.00    2.30
   8   3  -1   10.30    4.50
  -8  -3   1   10.30    3.50
  -8  -3   1   11.40    4.40
  -8  -3   1    9.50    1.70
  -8  -3   1    8.70    1.40
   7   3  -1    6.00    4.20
   7   3  -1   20.00    4.90
   7   3  -1   12.90    2.40
   7   3  -1   10.20    2.30
   7   3  -1    8.70    3.10
  -7  -3   1   10.70    4.60
  -7  -3   1   10.20    1.90
  -7  -3   1   10.70    1.80
  -7  -3   1   12.20    4.20
  -7  -3   1   16.00    3.60
   6   3  -1   38.60    3.20
   6   3  -1   38.60    5.60
   6   3  -1   30.90    3.20
   6   3  -1   32.90    3.60
   6   3  -1   35.20    5.00
  -6  -3   1   39.20    5.60
  -6  -3   1   33.90    4.80
  -6  -3   1   43.40    3.00
  -6  -3   1   37.50    2.70
  -6  -3   1   36.90    4.30
   5   3  -1   59.69    5.30
   5   3  -1   57.19    3.10
   5   3  -1   51.99    3.30
   5   3  -1   59.99    5.30
   5   3  -1   58.29    3.60
  -5  -3   1   57.79    3.10
  -5  -3   1   55.69    2.90
  -5  -3   1   56.99    4.20
  -5  -3   1   51.69    5.40
  -5  -3   1   51.49    5.20
  -5  -3   1   54.09    1.90
   4   3  -1  150.18    6.40
   4   3  -1  142.09    6.80
   4   3  -1  136.19    4.90
   4   3  -1  135.29    4.50
   4   3  -1  142.19    4.60
  -4  -3   1  144.39    4.40
  -4  -3   1  131.79    3.90
  -4  -3   1  135.19    6.40
  -4  -3   1  136.49    5.40
  -4  -3   1  130.99    4.30
  -4  -3   1  129.99    6.80
   3   3  -1  804.22   17.50
   3   3  -1  806.32   17.50
   3   3  -1  803.02   19.30
   3   3  -1  804.92   18.10
   3   3  -1  777.52   19.70
  -3  -3   1  776.02   17.90
  -3  -3   1  789.22   17.40
  -3  -3   1  766.02   17.30
  -3  -3   1  812.22   19.30
  -3  -3   1  780.52   18.30
  -3  -3   1  779.52   20.00
   2   3  -1  554.04   13.00
   2   3  -1  548.15   12.50
   2   3  -1  557.24   14.40
  -2  -3   1  548.35   14.70
  -2  -3   1  538.45   11.90
  -2  -3   1  545.05   14.70
  -2  -3   1  558.14   13.00
  -2  -3   1  564.04   12.50
  -2  -3   1  564.94   12.90
   1   3  -1  507.05   12.10
   1   3  -1  498.75   11.50
   1   3  -1  525.95   15.90
   1   3  -1  523.55   11.60
  -1  -3   1  508.25   14.60
  -1  -3   1  505.05   11.50
  -1  -3   1  511.25   13.10
  -1  -3   1  507.45   11.60
  -1  -3   1  501.65   12.10
  -1  -3   1  527.55   11.60
  -1  -3   1  494.35   11.20
   0   3  -1    5.50    2.40
   0   3  -1   12.50    1.70
   0   3  -1    9.20    1.30
   0   3  -1    5.90    1.40
   0   3  -1    6.70    1.20
   0  -3   1    6.40    2.40
   0  -3   1    5.60    1.40
   0  -3   1    8.20    1.60
   0  -3   1    9.20    1.10
   0  -3   1    8.20    1.40
  -1   3  -1  125.69    4.80
  -1   3  -1  126.99    3.60
  -1   3  -1  124.99    3.80
  -1   3  -1  129.69    3.70
  -1   3  -1  129.19    4.20
   1  -3   1  128.69    4.30
   1  -3   1  118.59    3.70
   1  -3   1  127.79    3.60
   1  -3   1  129.09    3.70
  -2   3  -1  583.04   13.10
  -2   3  -1  568.14   13.80
  -2   3  -1  576.84   12.80
  -2   3  -1  604.14   14.20
  -2   3  -1  591.84   13.50
   2  -3   1  584.94   13.90
   2  -3   1  581.14   12.80
   2  -3   1  559.94   12.80
   2  -3   1  592.64   13.10
   2  -3   1  586.54   14.10
  -3   3  -1  415.96    9.90
  -3   3  -1  395.16   11.20
  -3   3  -1  402.96    9.10
  -3   3  -1  407.16   10.70
  -3   3  -1  402.16    9.20
   3  -3   1  399.96    9.20
   3  -3   1  392.86   10.00
   3  -3   1  401.96   10.70
   3  -3   1  422.06   10.60
   3  -3   1  400.86    9.30
  -4   3  -1  198.18    6.60
  -4   3  -1  201.98    6.60
  -4   3  -1  195.98    5.10
  -4   3  -1  200.58    6.00
  -4   3  -1  195.88    4.90
   4  -3   1  201.88    5.10
   4  -3   1  202.98    5.30
   4  -3   1  195.28    6.40
   4  -3   1  194.88    6.00
  -5   3  -1   43.80    1.90
  -5   3  -1   46.10    3.20
  -5   3  -1   38.20    3.70
   5  -3   1   42.60    3.20
   5  -3   1   35.50    3.30
   5  -3   1   41.80    2.30
   5  -3   1   44.30    2.40
  -6   3  -1  149.29    6.50
  -6   3  -1  145.29    3.80
  -6   3  -1  143.19    3.70
   6  -3   1  139.79    5.80
   6  -3   1  135.59    5.60
   6  -3   1  149.29    4.50
   6  -3   1  145.09    7.60
  -7   3  -1   10.40    3.10
   7  -3   1   11.20    3.00
   7  -3   1   12.20    1.90
   7  -3   1   12.40    3.60
  -8   3  -1   11.20    3.90
   8  -3   1   10.30    3.10
   8  -3   1   10.30    1.90
   8  -3   1   15.40    2.10
   8  -3   1    9.80    3.20
   8  -3   1   13.10    3.80
   8  -3   1   10.00    4.50
   9  -3   1    0.80    2.60
   9  -3   1    2.00    1.60
   9  -3   1    7.80    7.20
   9  -3   1    0.80    3.20
   9  -3   1   -1.30    2.90
 -10   3  -1    4.30    3.90
  10  -3   1    4.50    4.20
  10  -3   1    6.20    3.50
  10  -3   1    4.40    1.80
  10  -3   1    3.80    1.90
  10  -3   1    8.40    2.90
  10  -3   1    5.00    3.10
 -11   3  -1    1.60    3.90
  11  -3   1    3.80    1.80
  11  -3   1    5.40    4.30
  11  -3   1    5.00    1.90
  11  -3   1    7.80    2.80
  11  -3   1    0.60    3.20
  11  -3   1    4.80    3.40
 -12   3  -1   -2.80    3.90
  12  -3   1    0.30    4.70
  12  -3   1    7.30    2.40
  12  -3   1   -4.80    2.90
  12  -3   1   -2.00    1.50
  11   2  -1    5.10    1.60
  11   2  -1    4.60    5.60
  11   2  -1   -2.50    2.70
  11   2  -1    1.50    4.00
  11   2  -1    0.50    5.10
 -11  -2   1    0.70    3.70
  10   2  -1   -0.80    3.00
  10   2  -1   -4.20    4.20
  10   2  -1   -1.20    3.70
  10   2  -1    2.60    2.80
  10   2  -1    0.50    1.80
  10   2  -1    1.50    1.90
 -10  -2   1   -0.10    3.80
   9   2  -1    0.00    3.90
   9   2  -1    0.10    1.90
   9   2  -1    1.80    2.90
   9   2  -1   -1.00    1.70
   9   2  -1    8.30    4.50
  -9  -2   1   -3.80    2.90
   8   2  -1   15.90    4.50
   8   2  -1   22.50    4.30
   8   2  -1   25.70    5.20
   8   2  -1   18.50    3.80
   8   2  -1   18.30    2.40
  -8  -2   1   21.30    4.00
   7   2  -1   -1.10    2.50
   7   2  -1    0.90    4.10
   7   2  -1    0.20    3.90
   7   2  -1   -0.40    1.80
  -7  -2   1    2.80    1.40
  -7  -2   1    2.40    1.10
  -7  -2   1    0.40    3.50
  -7  -2   1   -0.10    2.90
   6   2  -1   64.79    5.90
   6   2  -1   64.39    3.90
   6   2  -1   57.19    3.80
   6   2  -1   62.79    3.30
   6   2  -1   62.49    6.00
  -6  -2   1   60.49    5.70
  -6  -2   1   63.39    2.90
  -6  -2   1   63.69    6.00
  -6  -2   1   64.19    2.70
  -6  -2   1   63.79    4.70
   5   2  -1   61.39    3.80
   5   2  -1   66.89    5.30
   5   2  -1   63.29    3.00
   5   2  -1   61.19    3.00
   5   2  -1   61.99    5.00
  -5  -2   1   60.59    2.80
  -5  -2   1   59.89    2.40
  -5  -2   1   62.69    4.10
  -5  -2   1   56.89    3.50
  -5  -2   1   58.39    4.90
  -5  -2   1   66.49    5.20
   4   2  -1  185.18    7.20
   4   2  -1  179.68    5.00
   4   2  -1  178.68    5.90
   4   2  -1  181.28    5.10
   4   2  -1  190.08    7.00
  -4  -2   1  182.48    4.90
  -4  -2   1  185.78    6.20
  -4  -2   1  184.78    4.80
  -4  -2   1  181.18    7.00
  -4  -2   1  181.98    8.60
  -4  -2   1  174.68    4.50
   3   2  -1  768.92   17.10
   3   2  -1  756.02   18.60
   3   2  -1  772.82   16.50
   3   2  -1  752.02   16.50
   3   2  -1  777.42   18.10
  -3  -2   1  757.32   16.40
  -3  -2   1  759.02   17.30
  -3  -2   1  777.32   18.20
  -3  -2   1  769.62   16.40
  -3  -2   1  726.93   15.90
  -3  -2   1  746.43   18.80
   2   2  -1  902.41   21.10
   2   2  -1  910.51   20.40
   2   2  -1  922.21   20.40
  -2  -2   1  917.41   20.50
  -2  -2   1  917.81   19.90
   1   2  -1 3105.19   72.69
   0   2  -1   20.90    1.20
   0   2  -1   18.30    1.20
   0   2  -1   20.60    1.10
   0   2  -1   20.60    1.20
   0   2  -1   18.60    1.70
   0  -2   1   18.60    1.20
   0  -2   1   20.00    1.20
   0  -2   1   17.20    1.10
   0  -2   1   19.20    1.20
   0  -2   1   20.30    1.70
  -1   2  -1  561.74   12.30
   1  -2   1  558.74   12.50
   1  -2   1  563.34   12.00
  -2   2  -1  338.67    8.00
  -2   2  -1  334.37    8.40
  -2   2  -1  339.37    7.60
  -2   2  -1  328.77    7.50
  -2   2  -1  341.27    8.30
   2  -2   1  343.07    8.00
   2  -2   1  339.17    7.60
   2  -2   1  334.07    7.60
   2  -2   1  336.07    8.30
  -3   2  -1  429.06   10.70
  -3   2  -1  444.26    9.60
  -3   2  -1  447.36   10.90
  -3   2  -1  434.06    9.60
   3  -2   1  429.16    9.70
   3  -2   1  427.96    9.70
   3  -2   1  436.36   10.60
  -4   2  -1   93.59    2.80
  -4   2  -1   90.79    3.80
  -4   2  -1   95.79    2.70
  -4   2  -1  100.59    4.20
   4  -2   1   95.89    3.10
   4  -2   1   97.09    3.90
   4  -2   1   96.09    3.90
   4  -2   1   96.69    3.10
  -5   2  -1  162.28    4.20
  -5   2  -1  166.28    4.10
  -5   2  -1  170.68    6.40
   5  -2   1  162.28    5.40
   5  -2   1  161.98    4.60
   5  -2   1  166.98    7.10
   5  -2   1  164.18    5.70
   5  -2   1  162.88    4.60
  -6   2  -1    3.90    0.80
  -6   2  -1    4.80    2.50
  -6   2  -1    3.90    0.80
   6  -2   1    4.30    3.70
   6  -2   1    3.90    1.80
   6  -2   1    3.90    2.40
   6  -2   1    0.90    3.40
   6  -2   1    5.30    1.60
  -7   2  -1   16.40    3.80
   7  -2   1   17.90    3.30
   7  -2   1   21.40    2.30
   7  -2   1   15.60    4.60
   7  -2   1   23.10    2.30
   7  -2   1   24.70    3.90
   7  -2   1   20.80    3.50
  -8   2  -1   -0.30    2.50
   8  -2   1    5.10    1.80
   8  -2   1    2.80    3.20
   8  -2   1    0.90    4.20
   8  -2   1    3.00    2.90
   8  -2   1    2.00    2.80
   8  -2   1    4.10    1.80
   9  -2   1   -2.20    2.00
   9  -2   1   -0.40    2.60
   9  -2   1   -0.80    1.50
   9  -2   1   -0.10    3.10
   9  -2   1   -0.90    1.80
 -10   2  -1    0.50    3.40
  10  -2   1    5.10    3.20
  10  -2   1   -2.80    1.60
  10  -2   1   -1.20    3.00
  10  -2   1    0.00    2.60
  10  -2   1    0.50    1.80
  10  -2   1    4.50    4.60
 -11   2  -1    0.30    3.40
  11  -2   1    0.50    1.80
  11  -2   1   -0.60    1.70
  11  -2   1   -3.20    2.80
  11  -2   1   -0.30    4.70
  11  -2   1    3.20    2.70
  11  -2   1   -5.00    2.90
 -12   2  -1    1.20    3.80
  12  -2   1    6.70    2.50
  12  -2   1    5.60    3.50
  12  -2   1    3.40    4.80
  12  -2   1   -1.60    2.90
  12   1  -1   -1.20    3.00
  12   1  -1    3.10    1.90
  12   1  -1   10.70    3.60
  12   1  -1    7.40    2.20
  12   1  -1   -2.90    5.00
  12   1  -1    2.80    4.10
  12   1  -1    5.00    1.90
  12   1  -1   -1.40    3.30
 -12  -1   1    1.60    3.70
  11   1  -1    4.30    4.80
  11   1  -1    7.60    2.00
  11   1  -1   12.20    3.20
  11   1  -1    4.80    4.10
  11   1  -1   11.20    3.70
 -11  -1   1    4.00    3.80
  10   1  -1    9.30    3.10
  10   1  -1    4.60    1.80
  10   1  -1    9.10    4.30
  10   1  -1    4.20    4.60
  10   1  -1    6.40    3.30
 -10  -1   1    5.60    4.30
   9   1  -1   52.99    3.30
   9   1  -1   54.09    3.20
   9   1  -1   45.50    5.70
   9   1  -1   50.69    4.90
   9   1  -1   52.29    4.80
   9   1  -1   49.10    6.80
  -9  -1   1   54.29    5.90
   8   1  -1    1.60    1.70
   8   1  -1   -3.20    1.40
   8   1  -1   -1.60    4.00
   8   1  -1    0.90    2.80
   8   1  -1   -4.40    3.60
  -8  -1   1   -3.10    3.00
   7   1  -1    2.20    3.90
   7   1  -1    0.50    1.70
   7   1  -1    0.10    3.80
   7   1  -1   -0.90    1.40
   7   1  -1    4.90    2.80
  -7  -1   1    1.30    2.70
   6   1  -1    5.40    3.70
   6   1  -1    2.90    2.30
   6   1  -1    1.30    1.40
   6   1  -1    2.80    1.50
   6   1  -1    4.10    3.40
  -6  -1   1    0.70    2.60
  -6  -1   1    0.10    0.90
  -6  -1   1    1.70    0.80
  -6  -1   1    2.10    1.50
   5   1  -1   41.60    2.30
   5   1  -1   41.20    2.10
   5   1  -1   41.40    4.50
   5   1  -1   38.60    4.40
   5   1  -1   42.90    3.20
  -5  -1   1   39.90    4.10
  -5  -1   1   41.30    1.90
  -5  -1   1   40.80    2.30
  -5  -1   1   37.50    3.30
  -5  -1   1   42.90    1.70
   4   1  -1    6.00    1.10
   4   1  -1    5.90    1.10
   4   1  -1    7.60    2.50
   4   1  -1    5.50    1.40
   4   1  -1    6.50    2.80
  -4  -1   1    3.00    2.10
  -4  -1   1    7.30    2.80
  -4  -1   1    6.40    0.90
  -4  -1   1    5.90    2.10
  -4  -1   1    6.60    1.20
  -4  -1   1    6.20    1.00
   3   1  -1  269.87    8.20
   3   1  -1  274.47    7.00
   3   1  -1  261.87    6.20
   3   1  -1  267.17    6.20
   3   1  -1  268.77    7.90
  -3  -1   1  266.37    6.10
  -3  -1   1  272.87    7.20
  -3  -1   1  271.67    6.10
  -3  -1   1  266.17    7.80
  -3  -1   1  263.07    6.20
  -3  -1   1  271.57    8.30
   2   1  -1   71.69    3.20
   2   1  -1   79.69    2.60
   2   1  -1   77.59    2.20
   2   1  -1   73.29    2.20
  -2  -1   1   77.49    2.60
  -2  -1   1   72.09    2.30
  -2  -1   1   72.79    3.60
  -2  -1   1   72.79    3.20
  -2  -1   1   78.89    2.20
  -2  -1   1   74.99    2.70
  -2  -1   1   76.29    2.20
   1   1  -1   71.79    1.90
   1   1  -1   73.19    2.60
   1   1  -1   59.19    1.80
   1   1  -1   69.29    2.00
   1   1  -1   69.89    1.80
   1   1  -1   60.99    2.10
  -1  -1   1   75.19    2.20
  -1  -1   1   67.09    1.80
  -1  -1   1   68.49    2.00
  -1  -1   1   74.99    1.90
  -1  -1   1   73.59    1.90
  -1  -1   1   71.49    2.10
  -1   1  -1   32.20    1.10
  -1   1  -1   26.10    1.20
  -2   1  -1  799.12   17.00
  -2   1  -1  764.12   16.60
   2  -1   1  762.22   16.60
   2  -1   1  761.32   16.20
  -3   1  -1  587.64   13.10
  -3   1  -1  601.44   12.80
  -3   1  -1  629.14   14.30
   3  -1   1  582.54   14.10
   3  -1   1  591.04   15.10
   3  -1   1  594.64   13.60
   3  -1   1  604.24   13.10
   3  -1   1  614.64   13.00
  -4   1  -1  318.87    7.20
  -4   1  -1  325.27    7.20
  -4   1  -1  318.97    9.00
   4  -1   1  320.47    8.30
   4  -1   1  317.07    7.50
   4  -1   1  313.07    9.50
   4  -1   1  319.77    8.50
  -5   1  -1    6.30    2.30
  -5   1  -1    6.50    1.00
  -5   1  -1    7.50    1.00
   5  -1   1    6.40    1.30
   5  -1   1    8.10    2.40
   5  -1   1    7.40    2.20
   5  -1   1    6.20    2.70
  -6   1  -1   38.20    1.70
  -6   1  -1   43.10    4.30
  -6   1  -1   39.40    1.70
   6  -1   1   43.70    6.70
   6  -1   1   43.60    3.00
   6  -1   1   39.80    3.60
   6  -1   1   40.90    5.50
   6  -1   1   39.70    2.60
  -7   1  -1   33.80    4.40
   7  -1   1   27.50    2.80
   7  -1   1   26.90    3.50
   7  -1   1   27.60    5.00
   7  -1   1   24.60    2.60
   7  -1   1   29.90    5.10
   7  -1   1   26.70    4.10
  -8   1  -1   16.70    3.90
   8  -1   1   16.90    2.80
   8  -1   1   22.00    5.30
   8  -1   1   19.50    3.80
   8  -1   1   19.40    2.20
   8  -1   1   21.10    3.60
   8  -1   1   16.30    2.00
   9  -1   1   10.90    5.30
   9  -1   1    3.50    2.90
   9  -1   1    6.00    3.30
   9  -1   1    5.30    1.80
   9  -1   1    5.40    2.00
   9  -1   1    2.50    2.90
 -10   1  -1   -5.70    3.10
  10  -1   1    9.80    3.20
  10  -1   1    4.90    2.00
  10  -1   1    7.00    3.40
  10  -1   1    1.90    3.10
  10  -1   1   -3.50    4.40
 -11   1  -1    1.40    3.80
  11  -1   1    1.50    4.30
  11  -1   1    3.90    2.90
  11  -1   1   -2.30    3.10
  11  -1   1    1.10    3.10
  11  -1   1    4.10    2.80
  11  -1   1   -1.00    1.70
  11  -1   1    2.10    1.80
 -12   1  -1   -0.70    4.00
  12  -1   1    0.70    2.30
  12  -1   1   -0.10    3.30
  12  -1   1    1.40    1.90
  12  -1   1   -3.20    3.40
  12  -1   1   -1.00    8.70
  12  -1   1    6.30    2.50
  12  -1   1   -1.40    2.70
  12   0  -1    7.30    3.70
  12   0  -1    1.90    3.30
  12   0  -1    4.50    4.10
  12   0  -1    3.50    5.50
  12   0  -1    6.80    3.60
  12   0  -1    4.80    1.80
 -12   0   1    2.20    3.90
  11   0  -1    6.60    1.90
  11   0  -1    3.10    3.20
  11   0  -1    1.60    4.10
  11   0  -1    6.90    1.90
  11   0  -1    8.40    3.30
  11   0  -1    0.00    4.40
  11   0  -1   10.90    4.10
 -11   0   1    8.70    3.80
  10   0  -1    9.50    3.40
  10   0  -1    9.30    4.30
  10   0  -1   13.10    2.00
  10   0  -1   12.60    3.10
  10   0  -1   13.20    1.90
  10   0  -1   15.50    5.20
 -10   0   1    9.50    3.80
   9   0  -1   44.20    2.90
   9   0  -1   38.90    5.40
   9   0  -1   42.00    4.20
   9   0  -1   46.10    4.50
   9   0  -1   38.50    6.00
  -9   0   1   39.70    5.00
   8   0  -1   12.30    3.00
   8   0  -1   12.50    4.50
   8   0  -1   15.20    2.00
   8   0  -1   14.80    4.70
   8   0  -1   14.20    1.90
   8   0  -1   10.40    2.90
  -8   0   1   10.60    3.60
   7   0  -1    7.90    1.60
   7   0  -1   11.70    1.60
   7   0  -1   13.70    4.20
   7   0  -1   12.20    4.20
  -7   0   1   13.50    3.40
   6   0  -1   81.29    5.40
   6   0  -1   84.19    6.10
   6   0  -1   78.29    2.90
  -6   0   1   82.29    4.90
  -6   0   1   83.09    3.60
   5   0  -1  115.09    5.90
   5   0  -1  119.89    5.70
   5   0  -1  118.79    3.30
  -5   0   1  120.19    5.00
  -5   0   1  109.09    3.90
   4   0  -1  120.49    5.40
   4   0  -1  119.19    3.10
   4   0  -1  120.99    6.20
   4   0  -1  117.19    3.10
  -4   0   1  121.89    3.80
  -4   0   1  120.59    4.60
   3   0  -1   30.10    3.10
   3   0  -1   33.90    1.30
   3   0  -1   35.20    3.20
   3   0  -1   31.80    1.30
  -3   0   1   29.10    1.90
  -3   0   1   31.10    2.50
   2   0  -1  439.86   10.60
   2   0  -1  444.26   10.20
   2   0  -1  433.66    9.00
   2   0  -1  424.76    9.00
  -2   0   1  443.86    9.80
  -2   0   1  435.56    9.50
  -1   0  -1  162.48    4.30
  -1   0  -1  173.98    4.50
  -1   0  -1  190.68    5.30
   1   0   1  205.28    4.60
  -2   0  -1    7.70    1.00
  -2   0  -1    8.50    1.40
  -2   0  -1    8.60    1.90
  -2   0  -1    7.30    1.30
  -2   0  -1    9.80    1.10
   2   0   1    7.50    0.90
   2   0   1   10.70    1.90
   2   0   1    9.30    0.90
   2   0   1    8.90    1.30
  -3   0  -1   21.90    2.60
  -3   0  -1   22.60    1.50
  -3   0  -1   20.80    3.00
  -3   0  -1   22.30    1.90
   3   0   1   19.00    1.80
   3   0   1   21.00    2.40
   3   0   1   22.30    3.20
   3   0   1   24.20    1.70
  -4   0  -1  221.98    5.50
  -4   0  -1  216.98    7.10
  -4   0  -1  227.68    7.90
  -4   0  -1  230.38    5.40
   4   0   1  220.38    5.60
   4   0   1  220.98    5.70
   4   0   1  223.68    7.70
   4   0   1  227.08    6.70
  -5   0  -1    6.30    1.30
  -5   0  -1    7.00    2.50
  -5   0  -1    8.30    2.40
  -5   0  -1    7.20    1.90
   5   0   1    8.00    1.50
   5   0   1    6.00    3.00
   5   0   1    5.50    2.40
   5   0   1    9.00    1.40
   5   0   1    8.10    1.80
  -6   0  -1  223.68    5.50
  -6   0  -1  238.78    8.50
  -6   0  -1  233.58    5.70
   6   0   1  233.08    7.50
   6   0   1  230.88    7.90
   6   0   1  219.08    9.60
   6   0   1  226.88    7.90
   6   0   1  228.08    6.20
  -7   0  -1   59.49    5.40
  -7   0  -1   58.99    2.20
  -7   0  -1   59.79    2.20
   7   0   1   61.79    4.80
   7   0   1   54.29    6.60
   7   0   1   56.29    4.50
   7   0   1   63.69    3.40
  -8   0  -1   25.30    4.40
   8   0   1   27.90    2.70
   8   0   1   29.10    5.30
   8   0   1   38.40    5.70
   8   0   1   30.40    4.30
  -9   0  -1   43.30    6.30
   9   0   1   44.30    4.70
   9   0   1   40.90    4.50
   9   0   1   44.90    3.10
   9   0   1   42.90    4.40
   9   0   1   44.30    6.20
 -10   0  -1    1.30    3.60
  10   0   1    3.50    3.10
  10   0   1    0.70    1.80
  10   0   1    3.50    2.00
  10   0   1   -0.10    2.90
  10   0   1    4.10    4.70
  10   0   1   -0.60    2.30
 -11   0  -1    1.50    3.60
  11   0   1    4.30    2.20
  11   0   1    0.50    2.80
  11   0   1   -0.80    5.00
  11   0   1    1.20    3.10
  11   0   1    2.80    2.00
  11   0   1    2.20    3.10
  11   0   1    2.70    2.10
  11   0   1    4.70    2.90
 -12   0  -1   -6.20    3.70
  12   0   1   -1.90    2.20
  12   0   1    1.80    2.80
  12   0   1   -2.70    2.00
  12   0   1   -5.60    3.20
  12   0   1   -0.20    3.30
  12   0   1   -2.90    5.30
  12   0   1    8.10    2.90
  12  -1  -1    6.60    1.60
  12  -1  -1    0.90    3.90
  12  -1  -1    5.50    2.10
  12  -1  -1    6.10    4.90
  12  -1  -1    2.80    3.50
  12  -1  -1    1.90    4.10
  12  -1  -1    7.70    3.70
 -12   1   1   -1.20    3.70
  11  -1  -1   17.70    4.30
  11  -1  -1   18.10    3.90
  11  -1  -1   17.70    4.80
  11  -1  -1   21.20    3.90
  11  -1  -1   21.40    5.80
  11  -1  -1   12.60    1.80
  11  -1  -1   19.30    2.00
 -11   1   1   15.20    4.20
  10  -1  -1   67.59    3.10
  10  -1  -1   60.99    5.70
  10  -1  -1   61.89    7.30
  10  -1  -1   67.89    5.20
  10  -1  -1   60.99    3.10
  10  -1  -1   61.49    6.30
  10  -1  -1   69.49    5.30
 -10   1   1   62.99    6.10
   9  -1  -1   24.50    2.30
   9  -1  -1   28.60    5.50
   9  -1  -1   26.40    4.90
   9  -1  -1   22.70    4.30
   9  -1  -1   21.00    3.50
   9  -1  -1   18.50    1.80
  -9   1   1   19.70    4.10
   8  -1  -1   21.60    1.90
   8  -1  -1   17.20    3.40
   8  -1  -1   25.60    5.00
   8  -1  -1   19.30    2.10
   8  -1  -1   24.70    4.60
   8  -1  -1   16.40    4.90
  -8   1   1   24.40    4.10
   7  -1  -1  121.69    5.60
   7  -1  -1  113.49    3.60
   7  -1  -1  125.09    7.00
   7  -1  -1  116.59    7.50
  -7   1   1  120.49    6.20
   6  -1  -1  133.79    7.00
   6  -1  -1  132.59    5.30
   6  -1  -1  131.19    3.60
   6  -1  -1  125.09    6.50
  -6   1   1  127.69    5.80
  -6   1   1  130.09    4.80
   5  -1  -1  294.67    9.40
   5  -1  -1  279.67    9.10
   5  -1  -1  282.67    6.50
   5  -1  -1  290.17    7.90
  -5   1   1  296.77    8.60
  -5   1   1  288.67    7.60
   4  -1  -1  267.67    7.30
   4  -1  -1  279.57    6.80
   4  -1  -1  284.27    8.80
  -4   1   1  282.27    7.20
  -4   1   1  286.77   10.40
   3  -1  -1  410.86    8.70
   3  -1  -1  412.86    8.60
   3  -1  -1  412.76    9.60
  -3   1   1  420.46    9.70
  -3   1   1  419.56   10.10
   2  -1  -1   87.99    2.10
   2  -1  -1   88.69    3.30
   2  -1  -1   90.49    2.10
  -2   1   1   93.49    2.80
  -2   1   1   91.59    2.90
   1  -1  -1  215.38    5.80
   0   1   1   -0.40    0.60
   0   1   1   -0.70    0.30
   0   1   1   -0.70    0.20
  -1  -1  -1   64.99    2.40
  -1  -1  -1   67.09    2.50
  -1  -1  -1   65.09    2.00
  -1  -1  -1   66.49    2.70
   1   1   1   67.59    2.40
   1   1   1   64.59    1.90
   1   1   1   61.89    1.90
  -2  -1  -1   11.80    1.50
  -2  -1  -1   12.50    2.40
  -2  -1  -1   15.90    1.40
  -2  -1  -1   13.80    2.20
  -2  -1  -1   14.00    2.10
   2   1   1   13.00    2.40
   2   1   1   13.70    2.10
   2   1   1   15.30    1.50
   2   1   1   14.50    1.50
  -3  -1  -1   51.49    3.30
  -3  -1  -1   55.29    2.30
  -3  -1  -1   50.59    3.50
  -3  -1  -1   53.39    2.50
  -3  -1  -1   52.89    3.30
   3   1   1   52.99    3.20
   3   1   1   51.59    4.70
   3   1   1   52.09    2.30
   3   1   1   53.99    2.40
  -4  -1  -1   31.10    3.20
  -4  -1  -1   25.30    3.20
  -4  -1  -1   26.90    2.10
  -4  -1  -1   25.60    1.90
  -4  -1  -1   29.30    3.30
   4   1   1   27.90    2.20
   4   1   1   26.70    3.00
   4   1   1   26.60    3.60
   4   1   1   29.00    2.00
  -5  -1  -1   64.09    3.00
  -5  -1  -1   55.59    4.20
  -5  -1  -1   58.09    4.30
  -5  -1  -1   47.50    5.00
  -5  -1  -1   55.39    4.00
   5   1   1   60.59    3.00
   5   1   1   69.39    4.30
   5   1   1   57.29    2.80
   5   1   1   58.29    5.50
  -6  -1  -1   46.80    2.80
  -6  -1  -1   43.70    2.50
  -6  -1  -1   41.20    4.50
  -6  -1  -1   44.10    5.30
   6   1   1   41.10    4.30
   6   1   1   47.50    5.90
   6   1   1   44.20    3.00
   6   1   1   39.60    3.00
  -7  -1  -1   11.40    1.70
  -7  -1  -1    6.30    3.10
  -7  -1  -1   10.50    1.50
   7   1   1    5.60    2.00
   7   1   1   10.90    2.20
   7   1   1   10.70    4.60
   7   1   1    8.50    2.90
   7   1   1   13.90    3.70
  -8  -1  -1   39.60    4.90
  -8  -1  -1   39.10    1.90
  -8  -1  -1   40.50    2.20
   8   1   1   38.50    3.70
   8   1   1   29.70    3.00
   8   1   1   41.10    4.70
   8   1   1   44.70    6.10
  -9  -1  -1   23.30    4.70
   9   1   1   30.90    3.00
   9   1   1   30.50    4.00
   9   1   1   26.00    5.40
   9   1   1   29.60    4.50
   9   1   1   30.70    2.90
   9   1   1   29.00    4.10
 -10  -1  -1    6.80    4.00
  10   1   1    4.60    3.40
  10   1   1    6.70    3.30
  10   1   1    0.70    3.20
  10   1   1    0.80    4.50
  10   1   1    6.20    2.20
  10   1   1    5.20    2.50
 -11  -1  -1    4.10    4.00
  11   1   1    6.90    3.30
  11   1   1    0.60    3.00
  11   1   1    6.20    4.10
  11   1   1    0.70    4.90
  11   1   1    5.00    2.40
  11   1   1    1.50    3.10
  11   1   1    0.10    3.20
  12  -2  -1    0.60    1.30
  12  -2  -1   -8.70    4.20
  12  -2  -1   -2.50    3.80
  12  -2  -1    6.60    3.40
  12  -2  -1   -0.90    2.80
  12  -2  -1    1.40    3.10
  12  -2  -1    1.70    1.20
 -12   2   1    2.60    3.80
  11  -2  -1    1.30    1.30
  11  -2  -1    5.20    4.80
  11  -2  -1    8.80    3.70
  11  -2  -1    0.30    2.80
  11  -2  -1    2.50    2.90
  11  -2  -1    1.40    1.30
  11  -2  -1   -0.30    3.90
 -11   2   1    0.70    3.20
  10  -2  -1   40.80    5.70
  10  -2  -1   50.79    6.90
  10  -2  -1   54.89    5.50
  10  -2  -1   49.20    2.50
  10  -2  -1   53.29    5.00
  10  -2  -1   44.70    2.70
 -10   2   1   45.30    5.60
   9  -2  -1   48.10    2.50
   9  -2  -1   38.00    5.30
   9  -2  -1   42.30    2.50
   9  -2  -1   44.30    5.00
   9  -2  -1   51.69    7.60
   9  -2  -1   48.80    6.30
  -9   2   1   39.60    5.00
   8  -2  -1   61.69    6.00
   8  -2  -1   60.49    6.40
   8  -2  -1   63.89    2.80
   8  -2  -1   64.59    2.80
   8  -2  -1   64.89    4.60
   8  -2  -1   63.19    5.50
  -8   2   1   61.39    5.40
   7  -2  -1   45.50    5.30
   7  -2  -1   52.09    4.10
   7  -2  -1   56.09    6.00
   7  -2  -1   49.70    2.30
   7  -2  -1   54.69    4.80
   7  -2  -1   51.89    2.40
  -7   2   1   49.80    3.80
  -7   2   1   45.70    4.00
   6  -2  -1  148.49    4.00
   6  -2  -1  155.28    6.70
   6  -2  -1  150.38    4.10
   6  -2  -1  159.28    5.70
   6  -2  -1  150.48    6.80
  -6   2   1  160.88    6.40
  -6   2   1  157.58    5.80
   5  -2  -1  468.95   10.30
   5  -2  -1  473.25   10.40
   5  -2  -1  485.95   11.70
   5  -2  -1  475.65   13.00
  -5   2   1  481.25   11.80
  -5   2   1  489.55   12.50
   4  -2  -1  415.06    9.10
   4  -2  -1  411.36    9.30
   4  -2  -1  416.46   10.10
   4  -2  -1  408.66   11.30
  -4   2   1  438.06   10.80
  -4   2   1  428.36   10.30
   3  -2  -1  184.38    5.00
   3  -2  -1  185.18    6.20
   3  -2  -1  176.58    6.30
   3  -2  -1  185.78    4.40
  -3   2   1  182.58    5.00
  -3   2   1  187.18    5.60
  -3   2   1  187.28    6.40
  -3   2   1  189.58    4.30
  -3   2   1  192.38    4.30
  -3   2   1  191.48    5.40
   2  -2  -1  261.97    7.40
   2  -2  -1  273.97    6.00
   2  -2  -1  262.77    6.10
   2  -2  -1  259.47    6.00
   2  -2  -1  264.17    7.00
  -2   2   1  266.57    6.60
  -2   2   1  265.67    6.70
  -2   2   1  269.27    6.00
  -2   2   1  265.97    6.20
  -2   2   1  264.67    6.00
  -2   2   1  267.67    7.10
  -2   2   1  276.27    7.60
   1  -2  -1   48.50    1.80
   1  -2  -1   50.79    1.80
   1  -2  -1   50.69    1.50
   1  -2  -1   51.19    2.50
  -1   2   1   50.99    1.90
  -1   2   1   51.19    1.80
  -1   2   1   48.30    2.30
  -1   2   1   51.29    2.60
  -1   2   1   49.80    1.50
   0  -2  -1  147.89    3.80
   0  -2  -1  153.08    4.10
   0  -2  -1  145.59    4.70
   0  -2  -1  147.09    3.60
   0  -2  -1  149.59    3.90
   0  -2  -1  143.19    4.30
   0   2   1  142.29    3.80
   0   2   1  147.69    3.60
   0   2   1  151.58    3.70
   0   2   1  148.89    4.70
   0   2   1  148.69    3.80
   0   2   1  147.69    4.30
  -1  -2  -1  474.95   11.70
  -1  -2  -1  471.95   10.80
  -1  -2  -1  480.55   10.70
  -1  -2  -1  489.25   10.80
  -1  -2  -1  489.95   11.80
  -1  -2  -1  495.85   11.40
   1   2   1  484.45   11.70
   1   2   1  489.45   10.80
   1   2   1  475.15   11.70
   1   2   1  474.25   10.80
   1   2   1  489.45   10.80
  -2  -2  -1   10.30    2.70
  -2  -2  -1   10.80    1.60
  -2  -2  -1   15.10    2.40
  -2  -2  -1   13.00    2.80
   2   2   1    9.30    1.70
   2   2   1   12.20    1.60
   2   2   1   12.00    2.10
   2   2   1   11.70    2.40
   2   2   1   11.80    1.60
  -3  -2  -1   57.79    4.30
  -3  -2  -1   56.19    3.90
  -3  -2  -1   53.79    2.60
  -3  -2  -1   55.69    2.50
  -3  -2  -1   53.19    3.50
   3   2   1   60.59    3.70
   3   2   1   55.69    2.60
   3   2   1   59.79    3.70
   3   2   1   57.89    3.00
   3   2   1   53.29    2.80
  -4  -2  -1   86.69    5.50
  -4  -2  -1   86.59    5.00
  -4  -2  -1   80.89    3.10
  -4  -2  -1   82.69    3.30
  -4  -2  -1   80.49    4.50
   4   2   1   81.69    4.10
   4   2   1   82.49    3.30
   4   2   1   84.19    3.30
   4   2   1   92.19    5.60
   4   2   1   86.89    4.50
  -5  -2  -1    4.70    1.80
  -5  -2  -1    3.60    2.50
  -5  -2  -1    4.50    1.60
  -5  -2  -1    1.40    3.10
  -5  -2  -1   -1.70    3.20
   5   2   1    5.40    3.20
   5   2   1    2.00    3.40
   5   2   1    0.60    2.30
   5   2   1    3.80    1.90
   5   2   1    7.50    1.90
  -6  -2  -1    9.50    2.00
  -6  -2  -1    7.00    3.20
  -6  -2  -1    8.80    1.90
  -6  -2  -1    6.70    3.70
  -6  -2  -1   14.00    3.90
   6   2   1   12.70    4.50
   6   2   1    8.80    2.70
   6   2   1   11.20    3.70
   6   2   1   11.80    2.20
   6   2   1   12.10    2.20
  -7  -2  -1    0.60    3.00
  -7  -2  -1   -3.70    3.20
  -7  -2  -1    2.60    1.60
  -7  -2  -1    3.00    1.80
   7   2   1   -4.40    2.60
   7   2   1    1.10    2.00
   7   2   1    5.20    3.60
   7   2   1   -0.30    3.70
   7   2   1    1.40    1.20
  -8  -2  -1   18.80    2.00
  -8  -2  -1   19.90    4.10
  -8  -2  -1   18.10    1.80
   8   2   1   25.30    2.90
   8   2   1   14.60    5.00
   8   2   1   24.10    4.30
   8   2   1   20.60    3.60
   8   2   1   22.20    2.70
   8   2   1   15.80    1.70
  -9  -2  -1    4.00    1.10
  -9  -2  -1    3.20    3.40
   9   2   1    1.90    2.80
   9   2   1    5.20    2.60
   9   2   1    5.10    2.30
   9   2   1    0.10    1.40
   9   2   1    5.30    4.30
   9   2   1    4.20    3.40
   9   2   1    5.80    2.30
 -10  -2  -1   -1.30    3.30
  10   2   1    0.50    2.20
  10   2   1    1.80    3.00
  10   2   1    1.00    2.20
  10   2   1    4.30    5.10
  10   2   1    4.40    3.30
  10   2   1    3.80    3.40
 -11  -2  -1   -1.00    3.70
  11   2   1    4.90    3.40
  11   2   1    3.70    3.10
  11   2   1   -0.60    2.00
  11   2   1   -4.70    5.10
  11   2   1    0.00    3.30
  13  -3  -1    2.80    4.90
  13  -3  -1   -1.90    3.20
  13  -3  -1    1.70    4.10
  13  -3  -1    0.20    4.10
  13  -3  -1    0.50    0.90
  13  -3  -1    0.10    3.20
  12  -3  -1    0.10    1.10
  12  -3  -1   -2.80    3.80
  12  -3  -1    8.10    4.40
  12  -3  -1    0.10    1.10
  12  -3  -1    4.30    3.20
  12  -3  -1   -2.00    3.00
 -12   3   1   -3.70    3.50
  11  -3  -1   -0.50    2.90
  11  -3  -1    3.20    3.90
  11  -3  -1    3.60    1.30
  11  -3  -1    8.80    4.60
  11  -3  -1    9.80    3.80
 -11   3   1   -0.30    3.70
  10  -3  -1   12.00    1.60
  10  -3  -1    5.50    3.20
  10  -3  -1   14.40    4.20
  10  -3  -1    9.20    4.30
  10  -3  -1    9.60    1.60
  10  -3  -1    6.10    4.30
 -10   3   1    5.50    3.70
   9  -3  -1   43.40    4.60
   9  -3  -1   42.50    2.60
   9  -3  -1   37.80    5.60
   9  -3  -1   41.90    5.10
   9  -3  -1   36.00    5.50
   9  -3  -1   35.60    2.30
  -9   3   1   44.60    5.40
   8  -3  -1   31.20    2.30
   8  -3  -1   27.90    2.20
   8  -3  -1   25.80    5.20
   8  -3  -1   34.30    4.80
   8  -3  -1   28.80    3.50
  -8   3   1   32.70    4.60
   7  -3  -1   60.29    2.70
   7  -3  -1   59.89    2.60
   7  -3  -1   58.49    5.00
   7  -3  -1   63.29    4.30
  -7   3   1   60.49    5.00
   6  -3  -1   81.99    5.20
   6  -3  -1   91.09    4.40
   6  -3  -1   90.69    3.30
   6  -3  -1   90.19    3.00
  -6   3   1   91.29    4.50
  -6   3   1   85.59    5.00
   5  -3  -1  586.34   13.70
   5  -3  -1  566.54   16.70
   5  -3  -1  581.64   15.30
   5  -3  -1  557.94   12.50
   5  -3  -1  559.84   12.50
  -5   3   1  577.34   14.60
  -5   3   1  559.54   11.90
  -5   3   1  607.94   16.80
   4  -3  -1  441.86   10.40
   4  -3  -1  418.16   11.80
   4  -3  -1  451.05   11.80
   4  -3  -1  425.66    9.60
   4  -3  -1  421.66    9.60
  -4   3   1  428.06    9.40
  -4   3   1  441.56   11.20
  -4   3   1  421.56   12.10
  -4   3   1  429.06    9.40
  -4   3   1  441.96   10.80
  -4   3   1  428.06   10.30
   3  -3  -1  656.33   15.70
   3  -3  -1  649.83   14.50
   3  -3  -1  657.83   14.10
   3  -3  -1  669.13   16.70
   3  -3  -1  661.93   14.10
  -3   3   1  642.94   14.00
  -3   3   1  606.94   17.40
  -3   3   1  672.63   15.50
  -3   3   1  659.03   15.70
  -3   3   1  641.54   14.90
  -3   3   1  652.73   14.00
  -3   3   1  646.24   14.40
   2  -3  -1 9999.00  214.08
  -2   3   1 9796.12  212.38
   1  -3  -1   89.29    4.50
   1  -3  -1   91.99    4.00
   1  -3  -1   99.49    3.30
   1  -3  -1   94.79    2.80
   1  -3  -1  101.99    3.30
  -1   3   1   99.09    3.30
  -1   3   1  101.39    3.30
  -1   3   1   99.69    3.30
  -1   3   1   95.49    3.70
  -1   3   1   99.59    2.90
  -1   3   1   95.89    4.50
   0  -3  -1  341.27    9.50
   0  -3  -1  336.07    7.80
   0  -3  -1  337.77    8.70
   0  -3  -1  342.47    8.50
   0  -3  -1  330.17    8.10
   0  -3  -1  332.77    8.00
   0   3   1  342.07    9.50
   0   3   1  328.07    8.00
   0   3   1  336.77    8.80
   0   3   1  336.17    7.60
   0   3   1  336.17    7.80
   0   3   1  333.07    8.10
  -1  -3  -1  359.66    8.50
  -1  -3  -1  350.36    8.50
  -1  -3  -1  354.06   10.90
  -1  -3  -1  356.36    9.10
  -1  -3  -1  364.76    9.90
  -1  -3  -1  352.56    9.70
   1   3   1  347.37    8.40
   1   3   1  319.07   11.90
   1   3   1  346.67    9.40
   1   3   1  352.76    8.50
  -2  -3  -1  178.38    5.10
  -2  -3  -1  183.88    6.80
  -2  -3  -1  184.98    6.80
  -2  -3  -1  187.98    6.30
   2   3   1  177.98    6.60
   2   3   1  187.58    5.30
   2   3   1  180.88    6.40
   2   3   1  181.18    5.40
   2   3   1  178.08    5.20
  -3  -3  -1  143.39    6.60
  -3  -3  -1  150.38    4.60
  -3  -3  -1  144.09    4.60
  -3  -3  -1  142.29    5.80
   3   3   1  140.09    4.60
   3   3   1  137.19    6.00
   3   3   1  141.19    5.00
   3   3   1  145.59    6.30
   3   3   1  145.99    4.50
  -4  -3  -1   11.50    1.90
  -4  -3  -1   12.50    3.60
  -4  -3  -1   15.00    3.80
  -4  -3  -1   10.20    2.70
  -4  -3  -1   14.40    1.90
   4   3   1   13.70    2.10
   4   3   1   17.40    3.60
   4   3   1   16.00    3.40
   4   3   1   16.30    2.10
   4   3   1   14.00    2.20
  -5  -3  -1   33.40    3.00
  -5  -3  -1   31.80    4.70
  -5  -3  -1   32.20    2.90
  -5  -3  -1   36.40    5.10
  -5  -3  -1   34.90    4.20
   5   3   1   34.60    4.70
   5   3   1   32.70    3.30
   5   3   1   32.20    4.20
   5   3   1   28.50    2.90
   5   3   1   26.50    3.30
  -6  -3  -1   11.80    2.40
  -6  -3  -1   12.20    3.70
  -6  -3  -1   15.60    4.60
  -6  -3  -1   14.10    2.20
  -6  -3  -1   12.20    4.40
   6   3   1   13.10    2.30
   6   3   1   12.10    4.40
   6   3   1   14.70    3.10
   6   3   1   11.20    2.30
   6   3   1   11.60    3.90
  -7  -3  -1    1.00    3.40
  -7  -3  -1    8.10    2.20
  -7  -3  -1    7.50    1.90
  -7  -3  -1    2.80    3.80
  -7  -3  -1    3.90    4.00
   7   3   1    7.70    4.40
   7   3   1    8.10    2.50
   7   3   1    7.20    2.60
   7   3   1    3.60    3.70
   7   3   1    6.30    3.00
  -8  -3  -1   -0.60    1.50
  -8  -3  -1   -0.50    3.30
  -8  -3  -1    0.00    1.80
  -8  -3  -1   -1.90    3.70
   8   3   1   -0.10    2.10
   8   3   1   -2.60    3.40
   8   3   1   -1.00    2.40
   8   3   1   -0.50    2.90
   8   3   1   -1.70    4.30
  -9  -3  -1    0.30    4.10
  -9  -3  -1   -0.80    1.70
  -9  -3  -1   -0.30    1.60
   9   3   1   -1.90    2.10
   9   3   1   -1.80    4.20
   9   3   1    1.10    2.20
   9   3   1   -0.10    3.30
   9   3   1    1.20    2.80
 -10  -3  -1   -1.30    3.50
  10   3   1   -2.40    2.10
  10   3   1   -6.70    4.80
  10   3   1    1.20    2.40
  10   3   1    3.50    3.10
  10   3   1    5.40    3.60
  10   3   1    6.60    5.70
  11   3   1    7.00    3.20
  11   3   1   -0.90    3.50
  11   3   1   -3.60    6.30
  11   3   1    4.80    2.50
  13  -4  -1    5.20    3.60
  13  -4  -1   -2.60    3.90
  13  -4  -1    1.30    0.90
  13  -4  -1   10.90    5.10
  13  -4  -1    2.30    1.00
  13  -4  -1   -1.80    4.40
 -13   4   1    1.80    4.50
  12  -4  -1    5.80    1.40
  12  -4  -1   12.00    3.70
  12  -4  -1    6.70    4.30
  12  -4  -1   17.10    5.30
  12  -4  -1    7.20    1.40
  12  -4  -1    6.00    4.30
  12  -4  -1    8.10    3.50
 -12   4   1    4.20    3.90
  11  -4  -1   -2.90    3.70
  11  -4  -1   -0.30    3.00
  11  -4  -1    1.90    1.40
  11  -4  -1   11.20    5.10
  11  -4  -1    2.20    4.20
  11  -4  -1    1.20    1.30
  11  -4  -1    2.10    3.20
 -11   4   1    4.10    3.80
  10  -4  -1    0.50    1.50
  10  -4  -1   -0.50    3.10
  10  -4  -1   -0.10    2.80
  10  -4  -1   -0.60    1.30
  10  -4  -1    1.30    4.00
  10  -4  -1    2.90    4.30
  10  -4  -1    0.80    3.70
   9  -4  -1    3.00    1.40
   9  -4  -1   -1.10    3.30
   9  -4  -1    1.70    6.10
   9  -4  -1   -1.70    2.70
   9  -4  -1   -1.60    1.50
   9  -4  -1    1.40    3.70
  -9   4   1    1.10    3.10
   8  -4  -1   -0.50    1.40
   8  -4  -1   -0.70    1.50
   8  -4  -1   -3.40    3.70
   8  -4  -1   -3.60    3.20
   8  -4  -1   -0.50    2.70
  -8   4   1   -3.30    2.30
   7  -4  -1   27.70    2.40
   7  -4  -1   29.50    4.80
   7  -4  -1   28.30    2.30
   7  -4  -1   32.60    3.40
   7  -4  -1   25.80    4.30
  -7   4   1   32.00    4.20
   6  -4  -1   35.50    4.50
   6  -4  -1   31.40    2.70
   6  -4  -1   35.60    2.20
   6  -4  -1   27.40    3.90
   6  -4  -1   33.60    3.40
  -6   4   1   33.60    3.60
  -6   4   1   33.50    1.40
  -6   4   1   35.50    4.10
   5  -4  -1   22.90    2.10
   5  -4  -1   25.70    2.00
   5  -4  -1   25.60    2.50
   5  -4  -1   29.00    3.90
   5  -4  -1   30.10    3.70
  -5   4   1   26.50    2.40
  -5   4   1   25.00    1.60
  -5   4   1   20.70    3.00
  -5   4   1   28.80    4.10
  -5   4   1   23.70    3.10
   4  -4  -1  442.96   10.10
   4  -4  -1  449.26   10.10
   4  -4  -1  432.36   12.00
   4  -4  -1  435.76   10.50
   4  -4  -1  432.26   12.60
  -4   4   1  441.16   10.50
  -4   4   1  445.66   12.80
  -4   4   1  453.85   11.60
  -4   4   1  446.36   10.00
  -4   4   1  430.56    9.90
  -4   4   1  411.16   11.80
   3  -4  -1  892.71   19.20
   3  -4  -1  912.91   20.80
   3  -4  -1  898.31   19.20
   3  -4  -1  879.71   23.00
   3  -4  -1  877.11   19.20
  -3   4   1  911.61   19.10
  -3   4   1  884.61   19.10
  -3   4   1  888.31   20.70
  -3   4   1  905.11   21.60
  -3   4   1  887.81   19.20
  -3   4   1  928.71   20.40
  -3   4   1  743.43   19.60
   2  -4  -1  754.52   16.80
   2  -4  -1  771.32   16.80
   2  -4  -1  767.82   18.10
   2  -4  -1  766.92   16.50
   2  -4  -1  761.82   19.00
  -2   4   1  778.12   16.80
  -2   4   1  789.92   17.20
  -2   4   1  793.62   16.60
  -2   4   1  714.43   18.80
  -2   4   1  801.62   19.10
  -2   4   1  700.63   16.70
   1  -4  -1  515.55   11.50
   1  -4  -1  509.45   11.80
   1  -4  -1  513.75   12.80
   1  -4  -1  505.65   13.70
   1  -4  -1  506.55   11.80
  -1   4   1  500.75   13.70
  -1   4   1  522.35   11.90
  -1   4   1  516.95   11.50
  -1   4   1  516.05   11.90
  -1   4   1  513.45   11.80
  -1   4   1  507.35   12.80
   0  -4  -1  235.48    6.40
   0  -4  -1  240.48    6.80
   0  -4  -1  207.88   10.50
   0  -4  -1  236.58    6.50
   0  -4  -1  231.28    7.30
   0   4   1  229.58    8.00
   0   4   1  231.68    8.20
   0   4   1  242.68    6.50
   0   4   1  251.47    7.50
   0   4   1  229.28    6.40
  -1  -4  -1  343.47    9.90
  -1  -4  -1  354.16    8.70
  -1  -4  -1  350.86    8.80
  -1  -4  -1  354.86    8.70
  -1  -4  -1  346.67   10.60
   1   4   1  347.87   10.50
   1   4   1  341.17    8.70
   1   4   1  348.77    9.80
   1   4   1  360.36    8.90
   1   4   1  345.37    8.70
  -2  -4  -1  168.98    5.20
  -2  -4  -1  162.38    7.10
  -2  -4  -1  167.98    6.20
  -2  -4  -1  169.48    6.90
  -2  -4  -1  160.58    5.20
  -2  -4  -1  143.19    3.70
  -2  -4  -1  169.08    5.40
   2   4   1  168.68    5.40
   2   4   1  161.48    6.30
   2   4   1  161.58    5.10
   2   4   1  173.78    5.40
   2   4   1  165.98    6.90
  -3  -4  -1   52.09    3.20
  -3  -4  -1   50.39    4.80
  -3  -4  -1   49.50    4.30
  -3  -4  -1   47.10    5.00
   3   4   1   48.50    3.20
   3   4   1   56.39    4.70
   3   4   1   57.09    3.40
   3   4   1   52.79    3.50
   3   4   1   51.59    4.80
  -4  -4  -1  163.38    5.50
  -4  -4  -1  148.09    7.10
  -4  -4  -1  162.38    8.00
  -4  -4  -1  158.58    5.70
  -4  -4  -1  155.88    8.20
   4   4   1  156.88    5.60
   4   4   1  157.58    7.60
   4   4   1  175.98    7.90
   4   4   1  163.08    5.70
   4   4   1  171.58    6.20
  -5  -4  -1   29.30    3.00
  -5  -4  -1   28.80    4.90
  -5  -4  -1   26.60    4.20
  -5  -4  -1   33.00    3.00
  -5  -4  -1   26.70    5.40
   5   4   1   31.30    3.00
   5   4   1   28.90    3.20
   5   4   1   22.90    4.60
   5   4   1   28.60    4.80
   5   4   1   20.30    3.20
  -6  -4  -1   40.30    5.00
  -6  -4  -1   47.00    5.40
  -6  -4  -1   41.10    5.70
  -6  -4  -1   42.30    5.80
   6   4   1   46.50    4.10
   6   4   1   39.00    4.20
   6   4   1   42.10    5.40
   6   4   1   32.90    5.40
   6   4   1   43.50    3.60
  -7  -4  -1   16.10    4.90
  -7  -4  -1   15.40    2.50
  -7  -4  -1   17.20    5.00
  -7  -4  -1   13.40    2.30
  -7  -4  -1   11.70    3.80
   7   4   1   12.20    4.10
   7   4   1   16.80    2.70
   7   4   1   17.60    3.50
   7   4   1   14.10    4.80
  -8  -4  -1    0.10    1.50
  -8  -4  -1   10.30    4.60
  -8  -4  -1   -1.70    3.60
  -8  -4  -1    0.10    2.00
  -8  -4  -1    0.20    3.90
   8   4   1   -0.10    2.90
   8   4   1    5.20    3.70
   8   4   1    0.60    3.70
   8   4   1   -7.30    4.00
   8   4   1   -1.80    2.00
  -9  -4  -1    2.40    1.70
  -9  -4  -1    7.90    4.20
  -9  -4  -1    0.90    1.80
  -9  -4  -1    0.40    3.60
   9   4   1   -3.50    2.30
   9   4   1   -1.60    2.80
   9   4   1   -1.50    2.20
   9   4   1   -4.00    4.40
   9   4   1    1.30    3.40
 -10  -4  -1   -0.20    1.90
 -10  -4  -1    0.60    0.90
 -10  -4  -1   -3.50    3.70
  10   4   1    0.90    2.30
  10   4   1    0.70    2.40
  10   4   1    5.30    3.70
  10   4   1   -8.70    4.60
  10   4   1    0.60    3.10
  10   4   1    0.90    3.30
  13  -5  -1    6.00    4.40
  13  -5  -1   18.90    5.30
  13  -5  -1    1.50    3.60
  13  -5  -1   15.80    3.40
  13  -5  -1   11.30    4.70
  13  -5  -1    2.00    1.10
 -13   5   1   -0.50    3.90
  12  -5  -1   16.30    4.90
  12  -5  -1   19.10    4.20
  12  -5  -1   15.40    5.30
  12  -5  -1   15.70    4.00
  12  -5  -1    9.10    1.70
  12  -5  -1   10.20    4.70
 -12   5   1    1.70    4.00
  11  -5  -1    4.50    1.50
  11  -5  -1    4.80    1.70
  11  -5  -1    4.80    4.50
  11  -5  -1    6.20    4.40
  11  -5  -1   -3.90    2.70
  11  -5  -1    5.80    4.50
  11  -5  -1    8.30    3.70
 -11   5   1   -2.50    3.10
  10  -5  -1    6.30    2.90
  10  -5  -1    7.60    1.90
  10  -5  -1    5.90    4.50
  10  -5  -1    8.30    4.10
  10  -5  -1    8.90    4.00
  10  -5  -1    3.00    1.60
 -10   5   1    2.10    3.40
   9  -5  -1   15.40    4.60
   9  -5  -1    7.60    3.00
   9  -5  -1   12.60    1.70
   9  -5  -1   15.30    2.20
   9  -5  -1   13.40    4.10
  -9   5   1   11.80    5.90
   8  -5  -1   -1.40    1.60
   8  -5  -1    1.40    1.60
   8  -5  -1   -0.80    3.50
   8  -5  -1    0.80    2.60
   8  -5  -1   -1.10    3.90
  -8   5   1   -2.20    3.10
   7  -5  -1   -1.60    1.60
   7  -5  -1   -1.70    3.20
   7  -5  -1   -0.10    2.30
   7  -5  -1    0.60    1.60
   7  -5  -1   -3.90    3.50
  -7   5   1    0.10    1.00
  -7   5   1   -4.40    2.90
   6  -5  -1   10.10    3.70
   6  -5  -1   13.40    2.50
   6  -5  -1   13.70    1.90
   6  -5  -1   10.30    1.80
   6  -5  -1    6.40    3.60
  -6   5   1   11.70    3.10
  -6   5   1   15.70    1.70
  -6   5   1   12.20    1.50
  -6   5   1   13.00    4.20
  -6   5   1   12.20    2.40
   5  -5  -1   15.40    2.20
   5  -5  -1   14.00    3.50
   5  -5  -1   14.20    3.70
   5  -5  -1   17.40    2.00
   5  -5  -1   14.10    1.90
  -5   5   1   16.90    1.70
  -5   5   1   14.00    2.10
  -5   5   1   16.90    3.00
  -5   5   1   16.00    1.70
  -5   5   1   18.20    4.00
  -5   5   1   16.90    2.70
   4  -5  -1   17.10    3.50
   4  -5  -1   15.50    1.90
   4  -5  -1   15.90    3.10
   4  -5  -1   14.00    1.90
   4  -5  -1   16.40    1.90
  -4   5   1   15.20    1.90
  -4   5   1   17.30    2.70
  -4   5   1   17.80    2.50
  -4   5   1   14.40    3.70
  -4   5   1   12.20    2.80
  -4   5   1   14.80    1.70
   3  -5  -1   44.10    3.90
   3  -5  -1   46.90    2.80
   3  -5  -1   50.29    2.50
   3  -5  -1   45.70    2.40
   3  -5  -1   48.30    3.90
  -3   5   1   45.10    3.80
  -3   5   1   48.00    2.70
  -3   5   1   43.70    3.70
  -3   5   1   50.29    4.00
  -3   5   1   47.30    2.70
   2  -5  -1   18.60    2.90
   2  -5  -1   16.50    2.00
   2  -5  -1   13.60    3.50
   2  -5  -1   12.90    2.00
  -2   5   1   16.40    2.00
  -2   5   1   14.20    1.70
  -2   5   1   16.60    1.70
  -2   5   1   10.00    2.50
  -2   5   1   16.60    3.60
   1  -5  -1  146.59    5.70
   1  -5  -1  133.59    4.50
   1  -5  -1  141.39    6.60
   1  -5  -1  138.49    4.30
  -1   5   1  138.49    4.80
  -1   5   1  134.79    4.20
  -1   5   1  131.19    4.70
  -1   5   1  134.79    5.50
  -1   5   1  138.59    6.50
   0  -5  -1  137.89    6.60
   0  -5  -1  131.69    4.40
   0  -5  -1  125.49    4.30
   0  -5  -1  124.29    5.40
   0  -5  -1  128.39    4.80
   0  -5  -1  134.39    5.10
   0   5   1  127.39    6.30
   0   5   1  129.99    4.70
   0   5   1  128.89    5.50
   0   5   1  124.79    4.20
   0   5   1  122.69    6.70
  -1  -5  -1  550.64   13.70
  -1  -5  -1  528.95   14.40
  -1  -5  -1  537.25   12.90
  -1  -5  -1  535.95   15.10
  -1  -5  -1  530.95   12.90
  -1  -5  -1  548.45   12.90
   1   5   1  532.85   13.00
   1   5   1  558.74   15.40
   1   5   1  534.45   12.90
   1   5   1  540.85   12.90
   1   5   1  541.15   14.20
  -2  -5  -1  264.77    7.60
  -2  -5  -1  266.97   10.00
  -2  -5  -1  257.57    9.20
  -2  -5  -1  269.47    7.70
  -2  -5  -1  265.17    8.60
  -2  -5  -1  264.77    7.60
  -2  -5  -1  252.87    6.10
   2   5   1  262.77    9.70
   2   5   1  255.87    7.40
   2   5   1  266.67    7.70
   2   5   1  270.37    7.70
   2   5   1  272.17    9.00
  -3  -5  -1  283.17   11.00
  -3  -5  -1  277.47    9.70
  -3  -5  -1  269.47   10.50
  -3  -5  -1  289.67    8.30
   3   5   1  289.97   10.70
   3   5   1  293.37    8.40
   3   5   1  303.27    8.50
   3   5   1  294.97   10.10
   3   5   1  297.67    8.70
  -4  -5  -1   77.09    6.60
  -4  -5  -1   63.49    5.50
  -4  -5  -1   79.59    4.20
  -4  -5  -1   74.09    4.20
  -4  -5  -1   76.99    6.70
   4   5   1   72.89    6.40
   4   5   1   73.29    4.60
   4   5   1   78.29    5.90
   4   5   1   74.39    4.40
   4   5   1   79.09    4.40
  -5  -5  -1   71.29    7.20
  -5  -5  -1   71.99    6.00
  -5  -5  -1   72.39    4.50
  -5  -5  -1   72.69    7.20
  -5  -5  -1   70.29    4.10
   5   5   1   76.49    4.90
   5   5   1   74.89    4.50
   5   5   1   81.79    5.00
   5   5   1   67.79    6.10
   5   5   1   78.19    6.70
  -6  -5  -1   40.00    4.00
  -6  -5  -1   37.10    4.90
  -6  -5  -1   41.20    6.60
  -6  -5  -1   35.60    5.90
  -6  -5  -1   26.80    3.10
   6   5   1   26.60    3.10
   6   5   1   29.90    4.60
   6   5   1   42.70    5.70
   6   5   1   37.60    5.70
  -7  -5  -1   20.90    4.30
  -7  -5  -1   22.90    2.80
  -7  -5  -1   28.00    5.60
  -7  -5  -1   29.40    5.90
  -7  -5  -1   25.50    3.10
   7   5   1   30.10    5.50
   7   5   1   31.10    3.40
   7   5   1   23.40    5.30
   7   5   1   25.90    3.90
   7   5   1   26.20    3.20
  -8  -5  -1   10.00    5.10
  -8  -5  -1    8.90    2.30
  -8  -5  -1    4.40    3.90
  -8  -5  -1    8.30    4.60
  -8  -5  -1   11.40    2.50
   8   5   1    5.00    2.70
   8   5   1    9.50    4.10
   8   5   1   12.00    3.30
   8   5   1    8.60    2.60
   8   5   1    4.50    4.50
  -9  -5  -1    3.60    1.90
  -9  -5  -1    9.80    4.30
  -9  -5  -1   -0.70    3.40
  -9  -5  -1    5.10    4.00
   9   5   1    2.80    2.70
   9   5   1    8.70    3.50
   9   5   1    7.50    4.80
   9   5   1    4.10    2.80
   9   5   1   -0.20    4.90
  10   5   1    9.80    4.10
  13  -6  -1    5.80    1.60
  13  -6  -1   13.10    6.40
  13  -6  -1   10.10    4.90
  13  -6  -1    2.60    1.50
  13  -6  -1   13.40    5.10
  13  -6  -1   12.50    4.60
 -13   6   1    2.30    4.50
  12  -6  -1    2.10    1.70
  12  -6  -1   13.10    4.90
  12  -6  -1   10.30    3.80
  12  -6  -1    8.40    3.40
  12  -6  -1    7.30    4.70
  12  -6  -1   11.70    5.10
 -12   6   1    2.10    3.40
  11  -6  -1   14.30    2.00
  11  -6  -1   14.70    4.30
  11  -6  -1   20.10    5.10
  11  -6  -1   15.00    5.20
  11  -6  -1    9.70    3.30
  11  -6  -1   14.30    2.20
 -11   6   1    7.90    4.00
  10  -6  -1    6.60    3.00
  10  -6  -1    6.00    1.80
  10  -6  -1   11.00    4.20
  10  -6  -1    0.00    4.00
  10  -6  -1    7.90    2.00
 -10   6   1    2.70    3.50
   9  -6  -1    0.20    3.60
   9  -6  -1    2.10    1.70
   9  -6  -1   -0.10    4.00
   9  -6  -1    1.40    2.00
   9  -6  -1    0.20    2.60
  -9   6   1   -2.10    3.30
   8  -6  -1   13.40    2.30
   8  -6  -1   13.10    4.60
   8  -6  -1   15.00    3.00
   8  -6  -1   10.70    2.20
   8  -6  -1    9.50    4.20
  -8   6   1   13.30    1.30
  -8   6   1   10.50    3.10
   7  -6  -1    5.60    1.90
   7  -6  -1    0.20    2.50
   7  -6  -1    1.70    3.90
   7  -6  -1    3.10    3.90
  -7   6   1    4.40    2.40
  -7   6   1    6.30    4.20
  -7   6   1    3.70    1.40
  -7   6   1    3.00    2.70
  -7   6   1    5.00    1.60
   6  -6  -1   10.30    4.20
   6  -6  -1   10.00    1.90
   6  -6  -1   10.50    2.50
   6  -6  -1    8.10    2.20
   6  -6  -1    3.80    3.70
  -6   6   1   13.50    4.50
  -6   6   1   10.70    3.40
  -6   6   1   12.40    2.50
  -6   6   1   13.80    1.90
   5  -6  -1    0.50    3.30
   5  -6  -1   -2.00    3.10
   5  -6  -1   -2.40    1.50
   5  -6  -1    0.80    1.90
   5  -6  -1   -2.40    1.60
  -5   6   1    1.60    3.60
  -5   6   1   -2.50    1.80
  -5   6   1    1.70    1.70
  -5   6   1   -1.50    1.80
  -5   6   1   -1.40    3.10
  -5   6   1    1.70    1.70
   4  -6  -1  177.88    8.20
   4  -6  -1  180.08    5.70
   4  -6  -1  184.98    7.60
   4  -6  -1  187.58    5.70
   4  -6  -1  186.78    5.80
  -4   6   1  185.38    5.60
  -4   6   1  183.68    7.20
  -4   6   1  184.78    5.70
  -4   6   1  188.28    8.40
  -4   6   1  180.58    5.60
   3  -6  -1  173.98    5.60
   3  -6  -1  173.48    7.00
   3  -6  -1  159.78    7.40
   3  -6  -1  169.08    5.50
   3  -6  -1  172.68    5.30
  -3   6   1  174.48    5.20
  -3   6   1  160.78    5.20
  -3   6   1  176.18    8.00
  -3   6   1  175.98    5.50
  -3   6   1  181.98    6.80
   2  -6  -1  140.69    4.60
   2  -6  -1  151.08    6.40
   2  -6  -1  137.99    6.80
   2  -6  -1  149.49    4.90
   2  -6  -1  144.29    4.80
  -2   6   1  144.19    5.10
  -2   6   1  133.99    7.10
  -2   6   1  145.79    5.10
  -2   6   1  142.79    4.60
  -2   6   1  146.49    6.30
   1  -6  -1   31.60    3.30
   1  -6  -1   39.70    4.90
   1  -6  -1   34.40    2.60
   1  -6  -1   36.30    2.70
   1  -6  -1   39.40    2.60
   1  -6  -1   34.30    3.30
  -1   6   1   31.60    4.60
  -1   6   1   35.60    2.70
  -1   6   1   38.30    2.60
  -1   6   1   37.80    4.00
  -1   6   1   40.70    2.70
   0  -6  -1  133.69    6.20
   0  -6  -1  130.59    6.70
   0  -6  -1  140.49    5.70
   0  -6  -1  140.69    5.20
   0  -6  -1  125.59    4.80
   0  -6  -1  124.29    4.70
   0   6   1  140.79    6.30
   0   6   1  139.29    5.40
   0   6   1  133.69    4.70
   0   6   1  133.89    7.10
   0   6   1  132.99    4.90
  -1  -6  -1  210.18    7.50
  -1  -6  -1  220.38    6.90
  -1  -6  -1  209.78    6.50
  -1  -6  -1  206.98    6.50
  -1  -6  -1  208.48    8.20
  -1  -6  -1  205.58    9.10
   1   6   1  212.18    6.90
   1   6   1  204.08    9.00
   1   6   1  212.88    8.00
   1   6   1  201.48    6.50
   1   6   1  203.78    6.50
  -2  -6  -1  184.18    8.50
  -2  -6  -1  174.78    6.00
  -2  -6  -1  178.78    7.50
  -2  -6  -1  185.78    6.10
  -2  -6  -1  174.68    6.20
  -2  -6  -1  190.28    9.20
  -2  -6  -1  169.18    4.70
   2   6   1  179.18    6.30
   2   6   1  197.58    6.70
   2   6   1  182.68    6.20
   2   6   1  182.78    8.60
   2   6   1  189.88    8.00
  -3  -6  -1   74.69    4.50
  -3  -6  -1   62.59    6.50
  -3  -6  -1   73.49    4.40
  -3  -6  -1   63.49    5.50
  -3  -6  -1   76.89    6.50
   3   6   1   72.59    6.40
   3   6   1   80.99    4.70
   3   6   1   67.39    3.90
   3   6   1   76.49    4.60
   3   6   1   78.89    5.70
  -4  -6  -1   54.79    4.90
  -4  -6  -1   50.79    6.70
  -4  -6  -1   53.49    6.60
  -4  -6  -1   53.99    4.10
  -4  -6  -1   53.89    5.60
   4   6   1   61.09    4.40
   4   6   1   50.69    4.60
   4   6   1   53.59    6.30
   4   6   1   60.09    5.70
   4   6   1   57.19    4.40
  -5  -6  -1   81.79    6.30
  -5  -6  -1   71.49    7.30
  -5  -6  -1   83.09    7.60
  -5  -6  -1   80.49    4.90
  -5  -6  -1   80.19    4.90
   5   6   1   77.79    5.30
   5   6   1   75.89    6.80
   5   6   1   79.99    4.90
   5   6   1   84.19    4.90
   5   6   1   80.49    6.80
  -6  -6  -1   30.60    4.90
  -6  -6  -1   31.50    3.20
  -6  -6  -1   29.30    3.30
  -6  -6  -1   44.10    7.20
  -6  -6  -1   29.00    5.70
   6   6   1   28.20    3.50
   6   6   1   26.70    3.50
   6   6   1   28.80    3.80
   6   6   1   24.80    5.20
  -7  -6  -1   39.10    6.30
  -7  -6  -1   27.10    3.40
  -7  -6  -1   41.80    7.00
  -7  -6  -1   23.60    3.10
   7   6   1   26.10    5.40
   7   6   1   29.80    3.60
   7   6   1   25.30    3.40
   7   6   1   26.60    3.90
   7   6   1   34.80    6.00
  -8  -6  -1   30.60    5.20
  -8  -6  -1   17.90    2.90
  -8  -6  -1   29.90    3.30
  -8  -6  -1   34.50    6.80
  -8  -6  -1   36.20    6.20
   8   6   1   26.10    5.30
   8   6   1   24.50    5.70
   8   6   1   25.30    3.50
   8   6   1   26.50    3.60
   8   6   1   20.30    3.70
  -9  -6  -1   21.20    5.60
  -9  -6  -1    5.90    2.50
  -9  -6  -1   21.90    5.30
  -9  -6  -1    5.70    2.40
  -9  -6  -1    4.60    4.10
   9   6   1   11.80    3.90
   9   6   1   -1.90    5.00
   9   6   1    7.90    3.60
   9   6   1   14.20    4.70
  13  -7  -1   12.00    4.90
  13  -7  -1   21.50    5.60
  13  -7  -1   14.40    4.50
  12  -7  -1    3.40    3.30
  12  -7  -1    6.90    1.80
  12  -7  -1   13.80    3.90
  12  -7  -1   18.10    9.60
  12  -7  -1    4.30    4.70
  12  -7  -1    4.70    2.10
 -12   7   1    3.30    4.40
  11  -7  -1    2.90    3.10
  11  -7  -1    0.80    4.60
  11  -7  -1    8.70    4.00
  11  -7  -1   12.40    4.90
  11  -7  -1    6.70    1.90
  11  -7  -1    3.60    2.10
 -11   7   1    1.20    4.00
  10  -7  -1    3.60    3.00
  10  -7  -1   -1.40    1.90
  10  -7  -1   -0.10    1.90
  10  -7  -1    0.10    3.60
  10  -7  -1    3.10    3.80
 -10   7   1    1.10    3.40
   9  -7  -1    0.30    1.90
   9  -7  -1    2.50    2.00
   9  -7  -1    2.20    2.70
   9  -7  -1    3.90    3.90
   9  -7  -1   -0.70    3.80
   8  -7  -1    5.50    2.70
   8  -7  -1    3.90    2.00
   8  -7  -1    3.90    3.90
   8  -7  -1    3.60    4.00
   8  -7  -1    5.40    2.20
  -8   7   1    6.20    1.70
  -8   7   1    2.90    2.60
  -8   7   1    3.10    1.50
  -8   7   1   -0.80    3.20
  -8   7   1    8.10    4.60
   7  -7  -1   22.10    5.10
   7  -7  -1   15.60    4.60
   7  -7  -1   16.40    3.00
   7  -7  -1   16.20    2.40
   7  -7  -1   18.70    2.70
  -7   7   1   13.70    2.00
  -7   7   1   22.10    3.00
  -7   7   1   17.70    2.30
  -7   7   1   17.30    5.10
  -7   7   1   12.00    3.80
   6  -7  -1   50.39    3.60
   6  -7  -1   51.79    6.00
   6  -7  -1   61.39    4.20
   6  -7  -1   51.29    6.00
   6  -7  -1   56.89    3.60
  -6   7   1   52.69    3.10
  -6   7   1   59.39    5.40
  -6   7   1   57.29    6.20
  -6   7   1   54.69    3.20
  -6   7   1   50.39    3.90
   5  -7  -1  176.18    8.80
   5  -7  -1  175.18    6.00
   5  -7  -1  172.18    6.00
   5  -7  -1  176.68    6.00
   5  -7  -1  178.68    8.40
  -5   7   1  183.98    8.30
  -5   7   1  177.58    6.10
  -5   7   1  172.68    5.70
  -5   7   1  187.48    9.10
  -5   7   1  183.48    5.80
   4  -7  -1  182.58    6.10
   4  -7  -1  184.98    8.50
   4  -7  -1  195.78    6.10
   4  -7  -1  189.08    8.10
   4  -7  -1  180.68    6.00
  -4   7   1  188.68    8.90
  -4   7   1  197.68    8.20
  -4   7   1  181.98    5.90
  -4   7   1  191.48    6.20
   3  -7  -1   32.90    2.90
   3  -7  -1   30.50    3.90
   3  -7  -1   30.50    2.80
   3  -7  -1   43.40    3.50
   3  -7  -1   30.70    5.50
  -3   7   1   31.80    3.30
  -3   7   1   29.20    3.60
  -3   7   1   33.10    5.50
  -3   7   1   33.20    2.70
  -3   7   1   32.90    2.70
   2  -7  -1   68.79    5.30
   2  -7  -1   63.69    5.40
   2  -7  -1   67.69    3.50
   2  -7  -1   80.49    4.40
   2  -7  -1   67.49    3.60
  -2   7   1   66.39    6.10
  -2   7   1   67.79    3.60
  -2   7   1   76.19    4.30
  -2   7   1   73.59    5.20
  -2   7   1   74.99    3.50
   1  -7  -1   19.20    3.70
   1  -7  -1   16.60    2.80
   1  -7  -1   16.20    2.40
   1  -7  -1   20.60    2.40
   1  -7  -1   17.20    3.00
   1  -7  -1   20.00    4.20
  -1   7   1   16.30    4.50
  -1   7   1   18.00    2.90
  -1   7   1   16.00    2.40
  -1   7   1   18.20    3.30
  -1   7   1   17.80    2.30
   0  -7  -1  122.19    5.50
   0  -7  -1  124.29    6.70
   0  -7  -1  122.39    5.00
   0  -7  -1  122.79    7.70
   0  -7  -1  109.19    4.80
   0  -7  -1  127.49    6.00
   0   7   1  122.29    7.70
   0   7   1  126.99    5.60
   0   7   1  126.89    6.60
   0   7   1  121.09    5.00
   0   7   1  121.99    5.00
  -1  -7  -1   49.00    4.20
  -1  -7  -1   42.60    3.70
  -1  -7  -1   40.50    4.50
  -1  -7  -1   51.89    5.60
  -1  -7  -1   49.30    6.40
  -1  -7  -1   49.40    3.50
   1   7   1   52.99    4.40
   1   7   1   42.90    3.60
   1   7   1   40.30    3.40
   1   7   1   43.00    4.90
   1   7   1   45.60    6.00
  -2  -7  -1   74.49    3.10
  -2  -7  -1   77.59    4.20
  -2  -7  -1   84.09    4.60
  -2  -7  -1   70.09    6.40
  -2  -7  -1   83.69    7.40
  -2  -7  -1   80.09    4.80
  -2  -7  -1   78.79    5.80
   2   7   1   76.89    5.00
   2   7   1   77.59    4.90
   2   7   1   72.89    5.70
   2   7   1   76.49    6.80
   2   7   1   77.69    4.60
  -3  -7  -1   20.50    2.80
  -3  -7  -1   23.20    5.00
  -3  -7  -1   17.90    4.10
  -3  -7  -1   25.20    6.10
  -3  -7  -1   23.20    2.90
   3   7   1   23.30    5.50
   3   7   1   25.00    3.40
   3   7   1   23.30    3.00
   3   7   1   18.20    2.80
   3   7   1   23.50    4.50
  -4  -7  -1   15.70    6.00
  -4  -7  -1   20.00    4.40
  -4  -7  -1   18.20    4.80
   4   7   1   19.60    3.30
   4   7   1   21.20    3.40
   4   7   1   20.40    3.50
   4   7   1   19.80    5.20
   4   7   1   24.80    4.70
  -5  -7  -1   31.20    5.80
  -5  -7  -1   37.50    5.20
  -5  -7  -1   37.40    3.90
  -5  -7  -1   46.80    7.50
  -5  -7  -1   30.70    3.40
   5   7   1   36.30    4.00
   5   7   1   37.90    5.90
   5   7   1   33.80    5.50
   5   7   1   33.10    3.80
   5   7   1   30.00    3.90
  -6  -7  -1   36.60    5.20
  -6  -7  -1   47.60    4.40
  -6  -7  -1   38.00    6.30
  -6  -7  -1   45.40    7.60
  -6  -7  -1   31.00    3.60
   6   7   1   42.50    7.70
   6   7   1   43.00    6.00
   6   7   1   30.70    4.30
   6   7   1   42.40    4.50
   6   7   1   48.10    4.50
  -7  -7  -1   30.10    3.50
  -7  -7  -1   30.30    3.70
  -7  -7  -1   30.70    6.00
  -7  -7  -1   37.50    7.10
   7   7   1   35.90    6.20
   7   7   1   34.40    4.00
   7   7   1   20.90    5.50
   7   7   1   31.90    4.10
   7   7   1   30.50    3.90
  -8  -7  -1   12.60    5.70
  -8  -7  -1    4.30    4.20
  -8  -7  -1    3.70    2.60
  -8  -7  -1    9.00    2.80
   8   7   1    6.00    2.90
   8   7   1   16.70    4.90
   8   7   1    1.40    5.00
  12  -8  -1   15.80    8.20
  12  -8  -1    3.80    2.00
  12  -8  -1    5.90    4.90
  12  -8  -1    2.10    3.20
 -12   8   1    2.10    4.40
  11  -8  -1   -0.40    2.70
  11  -8  -1    1.70    2.00
  11  -8  -1    3.70    4.00
  11  -8  -1    2.30    4.50
  11  -8  -1   -2.60    2.00
 -11   8   1    3.80    4.30
  10  -8  -1    6.90    2.30
  10  -8  -1    5.00    3.00
  10  -8  -1    4.40    4.50
  10  -8  -1    2.90    2.20
  10  -8  -1    9.30    4.40
 -10   8   1    1.80    3.60
   9  -8  -1   19.20    3.50
   9  -8  -1   20.20    5.20
   9  -8  -1   15.30    2.60
   9  -8  -1   16.10    4.90
   9  -8  -1   16.70    2.60
  -9   8   1   21.70    5.50
  -9   8   1   15.40    4.30
  -9   8   1   17.80    1.80
  -9   8   1   19.40    3.30
  -9   8   1   16.30    1.70
   8  -8  -1    3.30    4.00
   8  -8  -1    1.50    2.50
   8  -8  -1    2.50    2.80
   8  -8  -1    6.60    2.20
   8  -8  -1    8.10    4.50
  -8   8   1    5.60    1.80
  -8   8   1    5.90    2.00
  -8   8   1    3.00    3.80
  -8   8   1    5.10    2.60
  -8   8   1    6.60    4.50
   7  -8  -1   55.89    4.20
   7  -8  -1   50.29    3.80
   7  -8  -1   59.29    7.80
   7  -8  -1   57.59    4.50
   7  -8  -1   54.49    6.50
  -7   8   1   54.89    3.60
  -7   8   1   53.89    6.50
  -7   8   1   54.39    4.20
  -7   8   1   46.10    3.90
  -7   8   1   49.70    4.80
   6  -8  -1   41.00    3.70
   6  -8  -1   34.60    6.00
   6  -8  -1   33.90    3.30
   6  -8  -1   35.30    5.30
   6  -8  -1   38.50    3.50
  -6   8   1   37.80    3.60
  -6   8   1   37.30    3.50
  -6   8   1   33.10    3.30
  -6   8   1   30.50    4.80
  -6   8   1   39.20    6.40
   5  -8  -1   45.40    3.30
   5  -8  -1   48.90    5.70
   5  -8  -1   52.79    3.90
   5  -8  -1   47.90    6.40
   5  -8  -1   44.80    3.80
  -5   8   1   46.10    5.90
  -5   8   1   49.99    3.50
  -5   8   1   51.09    3.70
  -5   8   1   51.69    3.60
  -5   8   1   49.40    5.70
   4  -8  -1   26.20    3.20
   4  -8  -1   27.70    4.70
   4  -8  -1   29.90    2.90
   4  -8  -1   30.90    3.40
   4  -8  -1   31.60    5.90
  -4   8   1   35.20    5.60
  -4   8   1   36.30    3.30
  -4   8   1   29.10    3.10
  -4   8   1   32.50    3.10
  -4   8   1   33.50    4.80
   3  -8  -1   46.80    3.40
   3  -8  -1   53.89    3.50
   3  -8  -1   51.49    6.60
   3  -8  -1   50.39    5.50
   3  -8  -1   51.69    4.20
  -3   8   1   45.70    3.40
  -3   8   1   42.40    5.10
  -3   8   1   52.79    3.50
  -3   8   1   45.40    5.30
  -3   8   1   58.69    4.20
   2  -8  -1   -1.80    3.20
   2  -8  -1   -1.50    2.60
   2  -8  -1    0.90    1.90
   2  -8  -1    2.10    3.60
   2  -8  -1    1.30    1.90
  -2   8   1    1.60    2.60
  -2   8   1   -2.90    1.70
  -2   8   1   -3.10    4.10
  -2   8   1    3.50    2.70
  -2   8   1    1.00    3.20
   1  -8  -1   24.90    3.40
   1  -8  -1   22.70    3.80
   1  -8  -1   27.50    2.90
   1  -8  -1   34.80    6.30
   1  -8  -1   29.70    3.60
   1  -8  -1   20.00    3.50
  -1   8   1   33.60    3.40
  -1   8   1   27.90    3.70
  -1   8   1   32.50    3.60
  -1   8   1   27.10    5.00
  -1   8   1   24.90    4.20
   0  -8  -1    0.70    2.10
   0  -8  -1   -3.10    1.80
   0  -8  -1    3.50    5.10
   0  -8  -1    0.80    3.00
   0  -8  -1    0.00    2.00
   0  -8  -1    3.60    3.60
   0   8   1   -1.40    2.10
   0   8   1   -2.60    3.90
   0   8   1   -4.40    2.50
   0   8   1    0.50    2.70
   0   8   1    0.10    2.80
  -1  -8  -1    7.90    3.50
  -1  -8  -1    8.70    2.00
  -1  -8  -1    7.70    5.30
  -1  -8  -1    4.20    4.90
  -1  -8  -1    4.30    2.40
  -1  -8  -1    1.70    2.80
  -1  -8  -1    8.90    3.50
   1   8   1    3.90    2.40
   1   8   1    2.50    3.40
   1   8   1    3.30    3.00
   1   8   1    3.10    4.80
   1   8   1    3.00    2.30
  -2  -8  -1   12.30    2.00
  -2  -8  -1   12.50    4.00
  -2  -8  -1    8.30    4.40
  -2  -8  -1   12.90    3.20
  -2  -8  -1    9.20    3.10
  -2  -8  -1   22.10    6.50
  -2  -8  -1   11.70    2.80
   2   8   1   13.00    3.00
   2   8   1   15.50    5.60
   2   8   1   14.80    3.90
   2   8   1   13.30    3.40
   2   8   1   11.80    3.30
  -3  -8  -1   36.10    4.90
  -3  -8  -1   37.40    4.00
  -3  -8  -1   44.20    6.00
  -3  -8  -1   35.00    3.60
  -3  -8  -1   50.09    7.80
   3   8   1   40.30    4.20
   3   8   1   34.60    4.10
   3   8   1   38.10    6.40
   3   8   1   45.00    4.40
   3   8   1   39.30    5.10
  -4  -8  -1    2.50    3.60
  -4  -8  -1    2.50    2.60
  -4  -8  -1    3.00    2.50
  -4  -8  -1    1.80    5.40
  -4  -8  -1    3.00    4.20
   4   8   1    4.10    2.70
   4   8   1    3.20    3.80
   4   8   1    3.60    2.20
   4   8   1    2.70    3.50
   4   8   1    0.40    7.50
  -5  -8  -1    8.10    4.70
  -5  -8  -1    3.90    2.70
  -5  -8  -1    3.60    9.90
  -5  -8  -1    3.90    2.60
  -5  -8  -1    7.80    3.90
   5   8   1    4.50    2.90
   5   8   1   12.90    5.00
   5   8   1   10.00    3.20
   5   8   1    6.20    3.00
   5   8   1    4.30    4.10
  -6  -8  -1   13.40    3.30
  -6  -8  -1   14.30    4.50
  -6  -8  -1   13.70    3.30
  -6  -8  -1   11.70    6.10
  -6  -8  -1    9.90    4.80
   6   8   1    5.90    3.10
   6   8   1    6.30    4.40
   6   8   1   13.10    3.40
   6   8   1    9.30    3.50
   6   8   1   14.80    5.10
  -7  -8  -1   11.50    2.90
  -7  -8  -1   18.20    6.60
  -7  -8  -1    5.10    4.20
  -7  -8  -1   18.00    5.30
  -7  -8  -1   10.90    3.20
   7   8   1   12.20    3.30
   7   8   1   14.20    4.70
   7   8   1    7.40    3.30
   7   8   1    4.60    5.00
   7   8   1    6.80    3.20
  12  -9  -1   10.10    4.30
  12  -9  -1    0.30    2.10
  12  -9  -1    4.80    5.30
  12  -9  -1    2.80    3.30
  12  -9  -1    4.90    2.50
 -12   9   1   -1.60    3.50
  11  -9  -1    3.00    4.40
  11  -9  -1    6.60    4.40
  11  -9  -1    4.30    2.40
  11  -9  -1    4.70    3.10
  11  -9  -1    4.10    2.40
 -11   9   1   -1.70    3.90
  10  -9  -1    4.20    2.50
  10  -9  -1    5.60    4.80
  10  -9  -1    9.90    4.80
  10  -9  -1   -0.30    2.30
  10  -9  -1    1.40    2.90
 -10   9   1    5.00    1.30
 -10   9   1    6.80    4.00
   9  -9  -1    4.40    2.40
   9  -9  -1   -1.20    2.80
   9  -9  -1   -3.20    4.20
   9  -9  -1    1.40    2.10
   9  -9  -1    7.40    4.60
  -9   9   1   -2.20    3.70
  -9   9   1   -0.30    1.70
  -9   9   1    3.60    2.60
  -9   9   1    0.00    1.60
   8  -9  -1   27.20    3.20
   8  -9  -1   29.50    6.00
   8  -9  -1   31.50    3.70
   8  -9  -1   34.50    3.60
   8  -9  -1   31.70    5.10
  -8   9   1   29.00    3.50
  -8   9   1   30.60    6.10
  -8   9   1   26.30    2.70
  -8   9   1   32.20    3.20
   7  -9  -1   14.90    5.10
   7  -9  -1   14.80    3.30
   7  -9  -1   14.70    2.90
   7  -9  -1   15.60    4.60
   7  -9  -1    7.50    2.30
  -7   9   1   12.20    2.80
  -7   9   1   18.20    5.50
  -7   9   1    8.20    2.00
   6  -9  -1   10.10    2.60
   6  -9  -1   10.00    2.70
   6  -9  -1   10.50    4.30
   6  -9  -1    7.30    2.70
   6  -9  -1   15.30    5.30
  -6   9   1   10.50    4.20
  -6   9   1   14.70    2.60
  -6   9   1   15.40    2.60
  -6   9   1   12.70    2.90
  -6   9   1   10.70    5.10
   5  -9  -1    1.80    2.20
   5  -9  -1   -2.60    2.50
   5  -9  -1   -2.80    4.70
   5  -9  -1   -1.30    3.70
   5  -9  -1    1.80    2.40
  -5   9   1   -4.10    3.50
  -5   9   1   -0.90    2.00
  -5   9   1    2.30    2.40
  -5   9   1   -2.00    4.20
   4  -9  -1    1.00    3.40
   4  -9  -1    1.50    2.10
   4  -9  -1    5.70    2.60
   4  -9  -1    7.00    2.90
   4  -9  -1    6.70    5.20
  -4   9   1    6.40    3.70
  -4   9   1    2.40    2.10
  -4   9   1    3.70    2.10
  -4   9   1    5.30    2.60
  -4   9   1    0.20    4.60
   3  -9  -1   63.19    7.40
   3  -9  -1   67.69    4.20
   3  -9  -1   57.49    3.90
   3  -9  -1   58.49    6.20
   3  -9  -1   62.89    6.40
  -3   9   1   62.79    5.90
  -3   9   1   70.59    4.80
  -3   9   1   59.09    6.80
  -3   9   1   62.19    4.60
  -3   9   1   66.69    3.90
   2  -9  -1    2.90    2.20
   2  -9  -1    7.20    3.10
   2  -9  -1    6.50    3.90
   2  -9  -1   10.50    2.50
   2  -9  -1    4.90    5.10
   2  -9  -1    7.20    3.50
  -2   9   1    9.00    5.00
  -2   9   1    5.00    3.70
  -2   9   1    9.50    2.40
  -2   9   1    8.40    3.10
  -2   9   1   10.50    2.50
   1  -9  -1   17.40    2.80
   1  -9  -1   15.30    4.30
   1  -9  -1   13.90    3.60
   1  -9  -1   20.10    3.60
   1  -9  -1   12.10    3.20
   1  -9  -1   17.80    5.00
  -1   9   1   19.90    4.30
  -1   9   1   19.60    2.90
  -1   9   1   15.10    5.50
  -1   9   1   14.00    3.30
  -1   9   1   16.10    2.80
   0  -9  -1   12.10    5.90
   0  -9  -1    8.20    2.60
   0  -9  -1   11.10    4.20
   0  -9  -1    6.20    2.50
   0  -9  -1    7.40    3.20
   0  -9  -1    7.90    3.50
   0   9   1    5.80    3.70
   0   9   1    5.70    2.50
   0   9   1    3.70    2.50
   0   9   1    5.10    3.20
   0   9   1    9.50    3.90
  -1  -9  -1   13.80    4.00
  -1  -9  -1   16.80    6.10
  -1  -9  -1   11.80    2.90
  -1  -9  -1   18.80    3.60
  -1  -9  -1   19.30    4.10
  -1  -9  -1   20.50    2.60
  -1  -9  -1   12.20    4.50
   1   9   1   17.60    2.90
   1   9   1   19.80    3.20
   1   9   1   20.90    3.70
   1   9   1   16.20    5.80
   1   9   1   14.00    4.20
  -2  -9  -1   -5.60    2.50
  -2  -9  -1    0.70    3.20
  -2  -9  -1    0.00    5.00
  -2  -9  -1    1.70    2.10
  -2  -9  -1   -3.60    1.60
  -2  -9  -1   -0.80    2.40
  -2  -9  -1   -3.70    4.70
   2   9   1    0.40    3.40
   2   9   1   -0.40    2.40
   2   9   1    1.30    2.90
   2   9   1   -4.50    2.80
   2   9   1   -6.20    4.20
  -3  -9  -1   -0.80    6.20
  -3  -9  -1   -5.30    3.40
  -3  -9  -1    0.50    3.90
  -3  -9  -1    4.10    2.90
  -3  -9  -1    2.20    2.80
   3   9   1    2.40    4.40
   3   9   1   -4.80    2.80
   3   9   1   -1.20    2.20
   3   9   1   -1.70    2.70
   3   9   1    0.90    6.20
  -4  -9  -1   -0.70    3.50
  -4  -9  -1    5.60    2.90
  -4  -9  -1   -0.80    4.30
  -4  -9  -1   -0.90    5.60
  -4  -9  -1   -0.10    2.60
   4   9   1   -1.80    3.70
   4   9   1    2.70    2.30
   4   9   1   -1.00    3.40
   4   9   1    0.60    4.60
   4   9   1   -3.10    2.40
  -5  -9  -1   -7.80    3.40
  -5  -9  -1    0.40    4.20
  -5  -9  -1    6.10    2.90
  -5  -9  -1    0.10    5.90
  -5  -9  -1    2.20    2.70
   5   9   1    3.30    3.10
   5   9   1    3.80    4.60
   5   9   1    3.10    2.90
   5   9   1   -4.10    3.70
   5   9   1   -0.20    2.90
  -6  -9  -1    3.50    2.90
  -6  -9  -1   -0.40    5.90
  -6  -9  -1   -0.60    3.90
  -6  -9  -1    7.80    4.80
   6   9   1    7.80    3.10
   6   9   1   -2.30    3.20
   6   9   1   10.20    4.80
   6   9   1   -0.90    2.80
   6   9   1   -3.90    4.20
  -7  -9  -1   -0.20    4.60
  -7  -9  -1    0.20    3.00
  -7  -9  -1   -6.00    3.70
  -7  -9  -1   -3.20    5.50
   7   9   1   15.10    4.90
   7   9   1   -7.30    4.60
   7   9   1   -3.60    3.10
   7   9   1    2.10    3.10
   7   9   1    2.10    3.10
  12 -10  -1   14.10    4.70
  12 -10  -1    1.10    2.30
  12 -10  -1    0.80    5.30
  12 -10  -1   -1.60    2.50
  12 -10  -1    5.10    3.60
 -12  10   1    0.90    4.60
  11 -10  -1   -0.20    4.50
  11 -10  -1    5.90    3.20
  11 -10  -1   14.80    4.90
  11 -10  -1    1.40    2.30
  10 -10  -1   -3.70    2.30
  10 -10  -1   -1.30    2.20
  10 -10  -1    3.40    4.20
  10 -10  -1    1.60    4.30
  10 -10  -1    0.50    2.80
 -10  10   1    0.10    1.60
 -10  10   1    1.10    1.70
 -10  10   1    0.30    2.40
 -10  10   1    3.50    4.10
   9 -10  -1   -2.60    2.40
   9 -10  -1    3.10    2.40
   9 -10  -1   -2.50    3.60
   9 -10  -1    1.00    3.30
   9 -10  -1    7.30    4.80
  -9  10   1    4.10    2.10
  -9  10   1    2.20    4.60
  -9  10   1    2.20    2.60
  -9  10   1    0.90    1.70
   8 -10  -1   11.50    2.80
   8 -10  -1    9.70    4.90
   8 -10  -1    6.90    7.90
   8 -10  -1    5.00    2.50
   8 -10  -1    7.90    2.90
  -8  10   1    5.60    2.30
  -8  10   1   11.70    5.50
  -8  10   1    6.60    2.70
  -8  10   1    2.30    1.90
   7 -10  -1    1.70    4.20
   7 -10  -1    4.00    2.50
   7 -10  -1   -3.00    3.90
   7 -10  -1    0.10    2.40
   7 -10  -1    0.90    2.50
  -7  10   1    1.00    4.50
  -7  10   1    2.00    2.30
  -7  10   1   -3.00    2.10
  -7  10   1   -0.40    2.10
   6 -10  -1   10.50    5.20
   6 -10  -1   13.20    3.00
   6 -10  -1   12.20    4.60
   6 -10  -1   13.00    2.60
   6 -10  -1   17.00    3.10
  -6  10   1   12.90    2.70
  -6  10   1   19.20    4.60
  -6  10   1   15.80    5.50
  -6  10   1   14.30    2.80
   5 -10  -1    3.80    3.30
   5 -10  -1    2.40    2.70
   5 -10  -1   -3.00    5.00
   5 -10  -1    1.60    2.20
   5 -10  -1   -2.30    2.60
  -5  10   1   -0.60    3.70
  -5  10   1   -1.90    2.10
  -5  10   1   -0.30    1.60
  -5  10   1   -4.00    5.20
   4 -10  -1   26.20    7.20
   4 -10  -1   30.10    3.90
   4 -10  -1   30.40    6.60
   4 -10  -1   31.10    3.70
   4 -10  -1   28.10    3.10
  -4  10   1   26.50    4.90
  -4  10   1   27.40    3.20
  -4  10   1   25.30    3.10
  -4  10   1   26.50    9.80
  -4  10   1   27.50    3.10
   3 -10  -1    2.80    2.80
   3 -10  -1    0.80    2.30
   3 -10  -1    2.60    4.10
   3 -10  -1    0.90    3.90
   3 -10  -1   -2.00    2.10
  -3  10   1   -0.60    5.70
  -3  10   1   -1.90    2.10
  -3  10   1    7.60    3.10
  -3  10   1    1.70    3.70
  -3  10   1    0.40    2.00
   2 -10  -1   74.49    6.50
   2 -10  -1   77.89    4.50
   2 -10  -1   74.89    7.10
   2 -10  -1   71.49    5.30
   2 -10  -1   70.09    4.50
   2 -10  -1   78.49    6.10
  -2  10   1   74.69    4.40
  -2  10   1   79.09    6.40
  -2  10   1   88.59    5.60
  -2  10   1   59.79    6.10
  -2  10   1   71.59    5.30
   1 -10  -1   11.50    3.50
   1 -10  -1   14.70    3.50
   1 -10  -1   16.90    2.90
   1 -10  -1   13.30    3.80
   1 -10  -1   13.80    6.10
   1 -10  -1   13.30    4.40
  -1  10   1   17.40    2.90
  -1  10   1   16.50    4.00
  -1  10   1   13.00    5.30
  -1  10   1   12.40    2.80
  -1  10   1   11.70    2.80
   0 -10  -1   17.40    3.70
   0 -10  -1   16.90    3.00
   0 -10  -1   20.30    4.10
   0 -10  -1   15.40    7.60
   0 -10  -1   17.60    3.70
   0  10   1   22.20    3.30
   0  10   1   22.00    3.80
   0  10   1   18.50    3.00
   0  10   1   26.40    4.90
   0  10   1   18.10    5.60
  -1 -10  -1    2.30    4.20
  -1 -10  -1    5.40    5.20
  -1 -10  -1   11.10    3.40
  -1 -10  -1    7.30    3.70
  -1 -10  -1    5.20    4.40
  -1 -10  -1    5.70    2.50
   1  10   1   13.70    3.60
   1  10   1    6.10    4.50
   1  10   1    3.60    2.40
   1  10   1    5.80    2.70
   1  10   1   11.10    5.50
  -2 -10  -1    1.30    6.00
  -2 -10  -1   -3.20    1.70
  -2 -10  -1    4.70    3.70
  -2 -10  -1    1.00    2.40
  -2 -10  -1   -0.70    2.90
  -2 -10  -1   -0.10    3.00
  -2 -10  -1   -3.20    3.70
   2  10   1   -2.70    2.30
   2  10   1    5.70    4.60
   2  10   1   -1.50    3.80
   2  10   1   -2.80    2.10
   2  10   1    0.70    2.40
  -3 -10  -1   -1.90    2.90
  -3 -10  -1    3.10    3.00
  -3 -10  -1    0.20    4.40
  -3 -10  -1    5.10    3.90
  -3 -10  -1    6.10    6.30
   3  10   1    5.10    3.30
   3  10   1    9.90    5.20
   3  10   1    1.60    2.80
   3  10   1    6.10    3.90
   3  10   1    0.00    3.30
  -4 -10  -1    0.10    2.90
  -4 -10  -1    6.20    4.60
  -4 -10  -1   -5.70    5.50
  -4 -10  -1    9.40    4.30
  -4 -10  -1   -0.20    2.80
   4  10   1   -1.20    3.90
   4  10   1    4.60    4.60
   4  10   1   -4.10    2.70
   4  10   1    3.80    3.40
   4  10   1   -5.00    2.00
  -5 -10  -1    0.00    2.80
  -5 -10  -1    2.20    5.30
  -5 -10  -1   -5.80    3.70
  -5 -10  -1   -1.90    4.20
  -5 -10  -1    0.70    6.10
   5  10   1   -1.00    2.90
   5  10   1   -4.20    4.20
   5  10   1    7.20    4.80
   5  10   1    4.00    3.30
  -6 -10  -1   -0.30    2.70
  -6 -10  -1   -3.40    3.10
  -6 -10  -1   -0.60    6.20
  -6 -10  -1   -3.70    3.90
  -6 -10  -1   -1.70    4.50
   6  10   1    1.70    3.50
   6  10   1    2.60    3.40
   6  10   1    6.50    3.90
   6  10   1   -7.00    3.10
   6  10   1   -3.40    4.60
  11 -11  -1    1.80    3.10
  11 -11  -1    2.30    2.90
  11 -11  -1    4.00    4.30
  11 -11  -1   12.50    4.70
  11 -11  -1    6.30    2.70
  10 -11  -1    4.10    3.10
  10 -11  -1    2.10    2.80
  10 -11  -1    7.80    5.70
  10 -11  -1    8.60    4.80
 -10  11   1    4.20    2.10
 -10  11   1    6.00    4.80
 -10  11   1   -2.60    2.40
 -10  11   1   -0.10    1.90
   9 -11  -1    1.60    2.80
   9 -11  -1   11.70    5.50
   9 -11  -1    6.90    3.10
   9 -11  -1    3.10    4.10
   9 -11  -1    0.80    2.70
  -9  11   1    1.10    4.20
  -9  11   1    3.50    4.70
  -9  11   1    0.60    1.90
  -9  11   1    4.50    2.10
   8 -11  -1    4.90    2.70
   8 -11  -1    3.50    4.40
   8 -11  -1    4.50    2.70
   8 -11  -1    4.00    4.70
   8 -11  -1    1.10    2.40
  -8  11   1    3.30    2.50
  -8  11   1    4.80    2.50
  -8  11   1    3.00    2.30
  -8  11   1    4.20    4.90
   7 -11  -1    2.40    2.60
   7 -11  -1    0.60    4.30
   7 -11  -1    1.50    4.70
   7 -11  -1   -0.60    2.50
   7 -11  -1    0.90    2.40
  -7  11   1   -0.60    4.70
  -7  11   1    2.90    2.40
  -7  11   1    2.10    2.20
  -7  11   1   -1.00    2.80
  -7  11   1    2.50    2.50
   6 -11  -1    5.10    4.30
   6 -11  -1    0.10    2.70
   6 -11  -1    3.70    4.60
   6 -11  -1    4.60    3.00
   6 -11  -1    1.60    2.30
  -6  11   1    8.30    4.20
  -6  11   1    2.00    2.40
  -6  11   1    7.80    5.10
  -6  11   1    6.10    2.70
  -6  11   1    0.80    2.50
   5 -11  -1    6.60    5.70
   5 -11  -1    1.60    2.80
   5 -11  -1    3.00    2.30
   5 -11  -1    4.90    4.00
  -5  11   1    1.50    4.80
  -5  11   1   -0.20    2.30
  -5  11   1    5.20    2.60
  -5  11   1    2.00    3.80
  -5  11   1    1.40    2.70
   4 -11  -1    3.10    3.60
   4 -11  -1    0.30    2.20
   4 -11  -1   -4.20    1.90
   4 -11  -1    2.50    4.80
   4 -11  -1    0.80    2.80
  -4  11   1   -0.10    4.20
  -4  11   1   -2.40    2.70
  -4  11   1   -1.50    3.70
  -4  11   1   -2.70    2.00
   3 -11  -1   22.80    6.60
   3 -11  -1   12.20    4.50
   3 -11  -1   17.90    3.70
   3 -11  -1   12.30    3.30
   3 -11  -1   14.00    2.80
   3 -11  -1   10.30    3.90
  -3  11   1   13.00    3.50
  -3  11   1   13.60    2.80
  -3  11   1   21.00    5.80
  -3  11   1   10.50    2.70
  -3  11   1   14.60    4.50
   2 -11  -1   14.50    2.90
   2 -11  -1    8.70    3.70
   2 -11  -1   11.50    2.80
   2 -11  -1   15.90    2.90
   2 -11  -1   14.10    4.60
   2 -11  -1   16.40    6.60
  -2  11   1   13.70    3.50
  -2  11   1   13.90    4.40
  -2  11   1    9.50    2.70
  -2  11   1   16.90    3.60
  -2  11   1   19.80    6.10
   1 -11  -1    7.50    3.30
   1 -11  -1    9.80    3.80
   1 -11  -1    8.80    2.70
   1 -11  -1    8.40    4.10
   1 -11  -1   11.40    6.30
   1 -11  -1    7.90    3.50
  -1  11   1   11.30    2.90
  -1  11   1    9.80    2.80
  -1  11   1   10.30    4.50
  -1  11   1    9.70    2.90
  -1  11   1   10.10    3.90
   0 -11  -1    5.30    3.40
   0 -11  -1    9.10    4.60
   0 -11  -1    8.90    3.40
   0 -11  -1   13.70    4.00
   0 -11  -1    2.30    6.20
   0 -11  -1   12.70    2.90
   0 -11  -1   11.80    2.90
   0  11   1   10.00    2.90
   0  11   1    8.40    2.80
   0  11   1    9.40    5.50
   0  11   1    6.40    3.50
   0  11   1    6.70    4.00
  -1 -11  -1    3.20    2.50
  -1 -11  -1    0.20    4.60
  -1 -11  -1    4.90    2.60
  -1 -11  -1    3.10    4.20
  -1 -11  -1    0.60    2.20
  -1 -11  -1    9.90    3.50
  -1 -11  -1   10.40    6.30
   1  11   1    1.90    3.80
   1  11   1    4.50    4.70
   1  11   1    3.00    2.50
   1  11   1   -4.20    3.10
   1  11   1    6.70    2.90
  -2 -11  -1   13.00    5.10
  -2 -11  -1    4.40    2.10
  -2 -11  -1    9.80    4.40
  -2 -11  -1   10.40    3.50
  -2 -11  -1   12.60    3.20
  -2 -11  -1    7.60    6.00
  -2 -11  -1   12.30    7.00
   2  11   1   11.30    3.30
   2  11   1   20.70    5.70
   2  11   1   12.50    4.60
   2  11   1   11.40    3.00
  -3 -11  -1    3.00    5.80
  -3 -11  -1    4.20    4.60
  -3 -11  -1    0.40    2.90
  -3 -11  -1   -0.60    2.20
   3  11   1   -4.90    3.80
   3  11   1    5.00    3.30
   3  11   1   -0.10    2.90
   3  11   1    0.10    3.30
   3  11   1    7.60    5.30
  -4 -11  -1    1.10    4.70
  -4 -11  -1   -5.30    6.30
  -4 -11  -1    1.40    4.10
  -4 -11  -1    5.30    3.30
  -4 -11  -1    1.00    3.30
   4  11   1   -0.60    4.20
   4  11   1    2.60    3.40
   4  11   1   15.80    5.40
   4  11   1    2.80    2.60
   4  11   1   -2.30    3.20
  -5 -11  -1    0.00    4.10
  -5 -11  -1    2.00    3.00
  -5 -11  -1    7.70    6.80
   5  11   1   -1.90    3.30
   5  11   1    3.90    3.60
   5  11   1    7.30    4.20
   5  11   1   -3.30    4.50
   5  11   1   15.50    5.80
  11 -12  -1   14.30    3.30
  11 -12  -1   23.00    6.00
  11 -12  -1    7.70    3.30
  11 -12  -1    2.20    3.30
 -11  12   1    7.00    1.90
 -11  12   1    1.70    1.70
 -11  12   1   13.20    5.40
  10 -12  -1    7.30    3.00
  10 -12  -1   17.10    5.70
  10 -12  -1    4.30    4.40
  10 -12  -1    1.80    3.00
 -10  12   1    7.10    3.00
 -10  12   1    5.80    2.20
 -10  12   1    9.80    5.30
 -10  12   1    4.40    2.20
   9 -12  -1   12.70    5.60
   9 -12  -1   11.60    6.10
   9 -12  -1   14.00    3.20
   9 -12  -1    6.80    3.10
   9 -12  -1   11.60    3.20
  -9  12   1    8.20    2.90
  -9  12   1   12.50    2.90
  -9  12   1   12.90    5.70
   8 -12  -1    3.50    4.90
   8 -12  -1   -2.70    2.50
   8 -12  -1    1.40    2.50
   8 -12  -1   -6.90    3.70
   8 -12  -1    1.80    2.80
  -8  12   1    3.60    4.90
  -8  12   1    0.70    2.30
  -8  12   1    2.00    2.50
  -8  12   1    3.60    4.70
   7 -12  -1   -2.70    4.20
   7 -12  -1   -2.90    2.60
   7 -12  -1    2.50    5.20
   7 -12  -1   -3.20    2.50
   7 -12  -1    4.00    2.90
  -7  12   1   -0.20    4.30
  -7  12   1    0.40    4.00
  -7  12   1   -2.10    2.60
  -7  12   1    4.40    2.60
  -7  12   1   -2.80    2.30
   6 -12  -1    8.80    5.80
   6 -12  -1    5.70    2.40
   6 -12  -1    3.60    2.50
   6 -12  -1    5.90    3.00
   6 -12  -1    2.20    4.20
  -6  12   1    1.50    2.50
  -6  12   1    4.60    5.20
  -6  12   1    5.00    2.60
  -6  12   1    1.70    3.80
   5 -12  -1    3.90    4.40
   5 -12  -1    3.80    4.50
   5 -12  -1    1.60    2.40
   5 -12  -1    3.20    3.00
   5 -12  -1    4.40    2.40
  -5  12   1    8.90    5.20
  -5  12   1    2.10    3.70
  -5  12   1    1.30    2.10
  -5  12   1    1.30    2.40
  -5  12   1    2.70    2.90
   4 -12  -1   -2.10    3.30
   4 -12  -1   -3.60    2.20
   4 -12  -1    1.90    3.20
   4 -12  -1    0.20    3.00
   4 -12  -1   -2.80    3.30
   4 -12  -1    1.80    5.50
  -4  12   1    0.90    4.90
  -4  12   1    1.80    2.80
  -4  12   1    0.70    2.30
  -4  12   1    3.70    4.20
  -4  12   1    3.30    3.70
   3 -12  -1    1.90    3.30
   3 -12  -1    1.90    3.20
   3 -12  -1    0.30    3.60
   3 -12  -1    5.60    4.80
   3 -12  -1   -0.50    2.30
  -3  12   1    8.30    5.20
  -3  12   1   -4.00    3.00
  -3  12   1   -2.50    3.40
  -3  12   1    3.30    2.50
  -3  12   1    6.20    3.30
   2 -12  -1    1.80    3.00
   2 -12  -1    2.90    2.60
   2 -12  -1   -1.40    3.40
   2 -12  -1    1.90    3.80
   2 -12  -1    0.40    2.30
   2 -12  -1    4.90    5.70
  -2  12   1   -0.20    2.40
  -2  12   1    3.90    3.30
  -2  12   1    1.20    3.80
  -2  12   1    6.30    4.10
  -2  12   1    1.90    3.80
   1 -12  -1    7.60    3.10
   1 -12  -1   -1.90    4.10
   1 -12  -1    4.20    2.60
   1 -12  -1    1.40    3.70
   1 -12  -1    3.80    2.60
   1 -12  -1    5.60    6.20
   1 -12  -1    1.20    3.20
  -1  12   1    2.40    3.30
  -1  12   1    4.90    3.60
  -1  12   1    5.70    5.20
  -1  12   1    3.90    2.90
  -1  12   1    0.90    2.50
   0 -12  -1    5.90    2.70
   0 -12  -1    3.60    3.30
   0 -12  -1    4.00    4.60
   0 -12  -1    4.70    6.30
   0 -12  -1    2.50    2.60
   0 -12  -1    3.20    2.70
   0  12   1    9.80    3.00
   0  12   1    4.10    4.00
   0  12   1   11.50    5.50
   0  12   1    7.90    3.00
   0  12   1    2.40    3.40
  -1 -12  -1    2.80    2.90
  -1 -12  -1   -0.40    3.20
  -1 -12  -1   -3.90    2.40
  -1 -12  -1    5.00    4.50
  -1 -12  -1   -3.90    3.10
  -1 -12  -1   -1.20    4.10
  -1 -12  -1    2.40    5.80
   1  12   1   -0.20    3.90
   1  12   1    2.50    3.50
   1  12   1   -0.40    3.40
   1  12   1    6.80    5.00
   1  12   1    5.80    3.10
  -2 -12  -1   -2.20    4.30
  -2 -12  -1    4.40    2.90
  -2 -12  -1    0.70    3.30
  -2 -12  -1   -2.50    6.20
  -2 -12  -1   -1.30    4.00
  -2 -12  -1    2.80    3.50
   2  12   1    2.10    3.40
   2  12   1   -3.70    2.60
   2  12   1   -1.50    3.70
   2  12   1   -2.30    3.80
   2  12   1    4.90    4.40
  -3 -12  -1    3.20    4.20
  -3 -12  -1   -5.70    6.20
  -3 -12  -1    6.90    4.60
  -3 -12  -1    0.20    3.20
  -3 -12  -1    5.30    5.10
   3  12   1    3.80    3.70
   3  12   1   14.30    6.30
   3  12   1    1.40    2.80
   3  12   1   -2.20    3.20
   3  12   1    2.90    4.60
  10 -13  -1   17.30    6.00
  10 -13  -1    1.90    3.30
  10 -13  -1   16.60    3.70
  10 -13  -1    9.00    3.40
 -10  13   1   10.80    2.70
 -10  13   1   16.40    6.90
 -10  13   1    8.10    3.20
   9 -13  -1    9.50    5.30
   9 -13  -1    7.10    3.10
   9 -13  -1    7.90    5.40
   9 -13  -1   -2.90    2.70
  -9  13   1    9.30    5.60
  -9  13   1   -0.60    2.40
  -9  13   1   -1.10    2.40
  -9  13   1    0.40    2.50
   8 -13  -1    2.50    3.10
   8 -13  -1    6.10    3.10
   8 -13  -1   -0.50    2.60
   8 -13  -1    9.30    6.10
  -8  13   1   -0.10    2.60
  -8  13   1    2.20    4.60
   7 -13  -1    3.40    3.10
   7 -13  -1   -1.00    2.90
   7 -13  -1   -0.80    2.50
   7 -13  -1    6.30    4.80
   7 -13  -1   11.10    6.10
  -7  13   1    4.30    5.20
  -7  13   1    0.80    4.00
  -7  13   1    3.90    2.80
  -7  13   1   -1.70    2.50
  -7  13   1    1.70    2.60
   6 -13  -1   11.60    5.00
   6 -13  -1   31.00    7.50
   6 -13  -1   14.80    3.10
   6 -13  -1   17.10    3.90
   6 -13  -1   20.00    3.80
  -6  13   1   11.00    3.20
  -6  13   1   18.80    3.50
  -6  13   1   21.30    5.30
  -6  13   1   21.40    6.50
   5 -13  -1    8.30    4.90
   5 -13  -1    7.30    2.70
   5 -13  -1   13.30    6.80
   5 -13  -1   14.90    4.00
   5 -13  -1   10.10    3.00
  -5  13   1   15.20    4.80
  -5  13   1   13.70    3.60
  -5  13   1   16.40    3.70
  -5  13   1   14.30    5.90
   4 -13  -1   -1.50    3.00
   4 -13  -1    1.10    2.50
   4 -13  -1    3.60    3.20
   4 -13  -1    3.20    3.50
   4 -13  -1    4.50    4.80
   4 -13  -1    7.10    4.70
  -4  13   1    5.30    3.90
  -4  13   1   11.60    5.50
  -4  13   1    6.10    4.20
  -4  13   1    7.10    4.10
  -4  13   1    4.20    3.20
   3 -13  -1   10.80    4.00
   3 -13  -1   15.30    3.90
   3 -13  -1   14.40    3.90
   3 -13  -1   10.70    5.00
   3 -13  -1   12.80    2.90
   3 -13  -1   15.60    7.40
  -3  13   1   15.00    3.70
  -3  13   1    9.80    4.50
  -3  13   1   17.60    4.10
  -3  13   1   19.20    5.30
  -3  13   1   11.90    2.90
   2 -13  -1   10.40    3.70
   2 -13  -1   -1.90    2.30
   2 -13  -1    1.10    5.40
   2 -13  -1    0.10    3.80
   2 -13  -1    3.00    2.50
   2 -13  -1   -3.30    4.40
  -2  13   1    7.20    2.70
  -2  13   1   -5.00    3.00
  -2  13   1    1.50    2.50
  -2  13   1    3.50    3.80
  -2  13   1    4.70    5.10
   1 -13  -1    0.90    2.40
   1 -13  -1    0.60    3.40
   1 -13  -1   -2.10    2.80
   1 -13  -1   -5.20    4.40
   1 -13  -1   -0.50    3.90
   1 -13  -1    0.60    5.60
   1 -13  -1    2.20    2.60
  -1  13   1   12.60    5.30
  -1  13   1   -3.00    2.50
  -1  13   1   -2.00    3.60
  -1  13   1   -0.60    2.60
  -1  13   1   -2.50    3.20
   0 -13  -1   -3.80    3.70
   0 -13  -1   -0.10    2.60
   0 -13  -1   -1.70    2.50
   0 -13  -1   -4.40    3.30
   0 -13  -1   -1.20    2.60
   0 -13  -1   -3.00    5.70
   0 -13  -1   -4.30    4.60
   0  13   1   13.30    5.70
   0  13   1    2.90    3.00
   0  13   1    1.20    3.90
   0  13   1    3.20    2.80
   0  13   1   -6.00    3.80
  -1 -13  -1    2.20    6.50
  -1 -13  -1    3.20    4.30
  -1 -13  -1    6.20    2.90
  -1 -13  -1   -6.30    2.40
  -1 -13  -1   -4.00    3.30
  -1 -13  -1  -10.10    3.90
  -1 -13  -1    2.80    3.50
   1  13   1   -1.80    3.80
   1  13   1   -1.80    2.90
   1  13   1   10.90    5.10
   1  13   1   -0.10    3.60
   1  13   1   -1.40    3.60
  -2 -13  -1    3.70    4.60
  -2 -13  -1   -6.00    6.10
  -2 -13  -1   -2.30    3.50
  -2 -13  -1   -1.70    3.30
   2  13   1    0.10    2.50
   2  13   1    5.50    3.70
   2  13   1    4.60    4.50
   2  13   1    0.50    3.30
   2  13   1   15.40    5.40
   8 -14  -1    2.60    4.70
   8 -14  -1    5.80    2.90
   8 -14  -1    5.10    3.50
  -8  14   1   18.90    6.40
  -8  14   1   10.50    3.00
  -8  14   1    7.60    2.90
  -8  14   1    5.10    2.90
   7 -14  -1   13.00    6.60
   7 -14  -1   -0.20    4.10
   7 -14  -1   -0.10    5.20
   7 -14  -1    1.40    3.30
   7 -14  -1    6.70    2.90
  -7  14   1   11.70    6.10
  -7  14   1    5.50    2.80
  -7  14   1    6.10    4.10
  -7  14   1    7.80    3.10
  -7  14   1   10.30    3.30
   6 -14  -1    8.60    3.50
   6 -14  -1    0.10    8.80
   6 -14  -1    0.60    2.70
   6 -14  -1   12.70    3.80
   6 -14  -1   16.60    6.40
  -6  14   1    9.00    3.00
  -6  14   1    7.80    4.80
  -6  14   1   19.10    7.80
  -6  14   1    4.30    3.20
  -6  14   1   10.30    3.30
   5 -14  -1    9.20    4.60
   5 -14  -1    1.50    5.80
   5 -14  -1   -0.40    3.40
   5 -14  -1    3.20    5.70
   5 -14  -1    8.40    3.60
   5 -14  -1    4.70    2.80
  -5  14   1    5.60    2.70
  -5  14   1    0.90    4.10
  -5  14   1    3.50    3.40
  -5  14   1   12.10    5.00
   4 -14  -1   15.10    3.30
   4 -14  -1   13.40    3.20
   4 -14  -1   10.30    4.50
   4 -14  -1   11.90    5.70
   4 -14  -1   22.90    4.50
   4 -14  -1   15.30    7.40
  -4  14   1   21.40    4.90
  -4  14   1   21.00    3.40
  -4  14   1   19.50    5.60
  -4  14   1   16.30    4.00
  -4  14   1   16.80    4.00
   3 -14  -1    2.50    3.90
   3 -14  -1    9.70    2.90
   3 -14  -1    5.30    3.60
   3 -14  -1    4.30    2.90
   3 -14  -1   -5.20    4.20
   3 -14  -1    5.20    6.80
  -3  14   1    1.70    2.60
  -3  14   1   12.80    5.70
  -3  14   1    5.00    3.80
  -3  14   1    5.30    3.40
  -3  14   1   -0.80    3.80
   2 -14  -1   -5.20    4.50
   2 -14  -1    4.20    2.60
   2 -14  -1    2.60    4.20
   2 -14  -1   -1.20    3.20
   2 -14  -1   -1.30    3.60
   2 -14  -1    6.40    3.60
  -2  14   1    8.90    4.40
  -2  14   1    4.00    2.80
  -2  14   1   11.10    5.50
  -2  14   1    2.10    3.40
  -2  14   1    5.40    2.80
   1 -14  -1    2.50    5.90
   1 -14  -1   -3.60    2.40
   1 -14  -1   -2.00    4.00
   1 -14  -1    4.10    2.80
   1 -14  -1   -1.00    3.50
   1 -14  -1   -3.70    3.10
   1 -14  -1   -6.20    6.20
  -1  14   1   -2.10    2.60
  -1  14   1   -0.40    2.70
  -1  14   1    1.10    3.70
  -1  14   1   10.20    5.70
  -1  14   1    5.60    4.40
   0 -14  -1   -2.50    5.60
   0 -14  -1    3.60    2.80
   0 -14  -1   -0.10    3.60
   0 -14  -1   -5.20    5.20
   0 -14  -1    1.20    3.10
   0 -14  -1    4.60    3.80
   0 -14  -1   -2.50    4.50
   0  14   1    4.60    3.90
   0  14   1    3.80    7.00
   0  14   1    2.40    4.00
   0  14   1   -0.60    3.10
   6 -15  -1    3.10    7.00
   6 -15  -1   -0.10    2.60
  -6  15   1    2.50    3.20
   5 -15  -1   -2.40    5.10
   5 -15  -1    4.10    7.30
   5 -15  -1    3.40    3.00
   5 -15  -1    9.00    4.00
   5 -15  -1    7.50    3.80
   5 -15  -1    6.20    4.60
  -5  15   1    1.40    3.70
  -5  15   1   12.90    5.20
  -5  15   1   16.30    5.20
  -5  15   1    6.40    4.40
  -5  15   1    5.20    3.00
   4 -15  -1   -3.90    4.80
   4 -15  -1    6.50    4.80
   4 -15  -1    5.30    3.60
   4 -15  -1    6.00    7.40
   4 -15  -1    2.70    2.70
   4 -15  -1    8.20    3.10
  -4  15   1    6.50    3.80
  -4  15   1    7.00    3.00
  -4  15   1    2.10    4.30
  -4  15   1   11.00    4.10
   3 -15  -1    3.20    2.90
   3 -15  -1    9.10    4.10
   3 -15  -1    0.20    6.90
   3 -15  -1    2.30    4.60
   3 -15  -1    3.60    2.80
   3 -15  -1    3.90    4.10
  -3  15   1    7.50    4.00
  -3  15   1   11.00    4.10
  -3  15   1   14.30    3.30
  -2  15  -2   15.90    6.80
  -2  15  -2    1.40    3.00
  -2  15  -2    0.50    4.20
  -2  15  -2    6.00    3.90
  -2  15  -2    2.70    3.10
   2 -15   2  -10.20    6.60
   2 -15   2  -12.40    8.00
   2 -15   2    5.50    4.30
   2 -15   2   -0.90    2.90
   2 -15   2    4.50    4.10
   2 -15   2    7.90    5.10
   2 -15   2    1.60    3.80
  -3  15  -2   -0.10    3.70
  -3  15  -2    0.00    3.70
  -3  15  -2    8.60    4.90
  -3  15  -2    5.10    4.50
  -3  15  -2    1.90    2.90
   3 -15   2   -1.30    2.80
   3 -15   2    0.10    7.40
   3 -15   2    1.10    4.20
   3 -15   2    0.70    2.80
   3 -15   2    0.90    2.90
   3 -15   2    5.40    4.40
  -4  15  -2    2.30    4.50
  -4  15  -2    5.50    2.90
  -4  15  -2    7.30    3.10
  -4  15  -2    3.40    3.70
  -4  15  -2   18.40    5.60
   4 -15   2    8.50    4.10
   4 -15   2    5.60    4.70
   4 -15   2   -8.00    5.50
   4 -15   2   -3.00    6.40
   4 -15   2   -3.50    3.40
   4 -15   2    0.20    2.90
   4 -15   2    2.10    4.20
  -5  15  -2    6.40    3.20
  -5  15  -2   10.50    5.20
   5 -15   2    1.60    5.90
   5 -15   2    2.20    4.40
   5 -15   2   -2.60    2.90
   5 -15   2   -7.30    4.70
   5 -15   2    4.40    4.00
   5 -15   2   -1.10    3.50
   5 -15   2    4.80    4.80
  -6  15  -2    5.30    4.40
  -6  15  -2    2.10    3.40
  -6  15  -2   19.40    5.80
  -6  15  -2   -2.90    2.70
  -6  15  -2    5.10    3.10
   6 -15   2    4.80    3.40
   6 -15   2   -0.40    3.10
   6 -15   2    0.90    4.10
   6 -15   2   -4.60    4.80
   6 -15   2    2.10    5.90
   6 -15   2   -4.20    4.80
   1  14  -2    4.50    4.00
   1  14  -2   14.90    5.60
   1  14  -2    4.80    4.10
   1  14  -2   -1.00    4.30
  -1 -14   2    1.30    3.40
  -1 -14   2    5.50    3.90
  -1 -14   2    5.80    7.20
  -1 -14   2    7.10    4.40
  -1 -14   2    3.20    3.80
  -1 -14   2   -9.80    4.60
  -1 -14   2   -1.40    3.40
   0  14  -2   10.90    4.20
   0  14  -2    8.00    4.50
   0  14  -2   15.70    3.90
   0  14  -2   23.20    6.10
   0 -14   2    6.80    3.20
   0 -14   2    1.50    3.40
   0 -14   2    6.80    3.90
   0 -14   2    0.80    6.10
   0 -14   2    1.70    4.00
   0 -14   2   -0.40    3.60
   0 -14   2    0.30    4.60
  -1  14  -2   10.40    3.90
  -1  14  -2    2.70    4.00
  -1  14  -2   11.70    4.00
  -1  14  -2   -0.90    2.70
  -1  14  -2   17.50    5.90
   1 -14   2    4.70    3.00
   1 -14   2    5.40    3.70
   1 -14   2    3.60    3.60
   1 -14   2    9.60    4.20
   1 -14   2    3.90    4.00
   1 -14   2   -3.30    4.50
  -2  14  -2    1.30    3.90
  -2  14  -2    4.10    3.00
  -2  14  -2   -0.30    3.50
  -2  14  -2   -5.70    3.10
   2 -14   2   -1.90    2.50
   2 -14   2    1.30    3.70
   2 -14   2    5.40    3.80
   2 -14   2   -6.60    4.10
   2 -14   2   -2.50    2.80
   2 -14   2   -7.80    6.30
   2 -14   2    0.90    2.70
  -3  14  -2    4.90    4.80
  -3  14  -2   -1.60    3.20
  -3  14  -2   -3.10    2.50
  -3  14  -2    6.50    4.30
  -3  14  -2    1.90    2.50
   3 -14   2    0.40    3.80
   3 -14   2   -2.90    4.10
   3 -14   2    2.70    2.90
   3 -14   2    1.40    3.80
   3 -14   2   -1.20    3.20
   3 -14   2   -1.20    6.30
  -4  14  -2   11.80    5.80
  -4  14  -2   -1.80    3.00
  -4  14  -2    1.90    3.20
  -4  14  -2    1.70    3.90
  -4  14  -2   -0.80    2.60
   4 -14   2    3.20    4.30
   4 -14   2    3.30    3.60
   4 -14   2   -4.00    2.30
   4 -14   2    1.30    2.90
   4 -14   2   -0.30    5.40
   4 -14   2   -0.60    3.60
   4 -14   2   -5.20    4.00
  -5  14  -2    2.40    3.00
  -5  14  -2    6.20    5.20
  -5  14  -2    1.10    2.70
  -5  14  -2    3.00    4.40
   5 -14   2   -2.20    4.60
   5 -14   2    0.10    2.70
   5 -14   2    1.40    6.00
   5 -14   2   -0.10    2.80
   5 -14   2    3.20    3.50
  -6  14  -2    1.00    3.80
  -6  14  -2   12.30    5.20
  -6  14  -2    1.30    3.10
  -6  14  -2    5.30    3.20
  -6  14  -2    5.70    2.90
   6 -14   2   -1.20    2.90
   6 -14   2    5.80    2.90
   6 -14   2   -6.80    4.00
   6 -14   2    4.00    6.00
   6 -14   2   -0.40    3.30
  -7  14  -2   -1.50    3.20
  -7  14  -2    1.00    2.70
  -7  14  -2   13.10    5.80
   7 -14   2    0.50    5.50
   7 -14   2   -1.00    3.40
   7 -14   2    1.70    3.00
   7 -14   2   -1.90    3.40
   7 -14   2   -1.00    5.30
  -8  14  -2   -3.70    2.70
  -8  14  -2   12.90    5.40
  -8  14  -2   -4.50    2.40
  -8  14  -2   -4.50    2.50
   8 -14   2   -1.70    3.00
   8 -14   2   -1.50    3.00
   8 -14   2   -3.90    4.60
   8 -14   2    3.50    6.10
   3  13  -2    5.60    3.00
   3  13  -2   11.10    4.70
   3  13  -2   -1.40    3.50
   3  13  -2    9.30    3.90
   3  13  -2   21.20    6.10
  -3 -13   2   11.50    3.50
  -3 -13   2    6.10    4.20
  -3 -13   2    6.70    5.30
  -3 -13   2    2.00    3.40
  -3 -13   2   11.50    6.40
  -3 -13   2    8.00    7.10
   2  13  -2   16.80    5.70
   2  13  -2    1.40    3.80
   2  13  -2    6.10    4.30
   2  13  -2    4.70    3.60
   2  13  -2    0.50    3.30
  -2 -13   2    4.30    3.00
  -2 -13   2    6.30    3.50
  -2 -13   2    0.20    4.40
  -2 -13   2    8.30    3.90
  -2 -13   2    0.30    2.50
  -2 -13   2    6.80    4.80
   1  13  -2   25.80    5.10
   1  13  -2   20.80    3.80
   1  13  -2   17.20    3.80
   1  13  -2   36.60    8.60
   1  13  -2   17.30    3.60
  -1 -13   2   12.90    3.20
  -1 -13   2   16.00    3.80
  -1 -13   2   15.60    4.70
  -1 -13   2   21.50    3.90
  -1 -13   2   18.20    3.60
  -1 -13   2   16.60    5.40
  -1 -13   2   22.60    7.60
   0  13  -2   21.00    6.10
   0  13  -2   18.50    3.70
   0  13  -2   14.90    3.40
   0  13  -2   21.70    4.40
   0  13  -2   27.70    5.00
   0 -13   2   13.60    5.00
   0 -13   2   16.50    6.50
   0 -13   2   21.60    4.50
   0 -13   2   20.10    4.20
   0 -13   2   12.70    3.70
   0 -13   2   21.90    3.60
   0 -13   2   19.70    3.50
  -1  13  -2   18.30    6.00
  -1  13  -2    6.20    2.90
  -1  13  -2    9.40    4.10
  -1  13  -2   10.80    3.90
  -1  13  -2    9.70    4.50
   1 -13   2   14.10    3.30
   1 -13   2    3.70    4.20
   1 -13   2   10.50    3.80
   1 -13   2    7.00    2.90
   1 -13   2    4.70    6.30
   1 -13   2    5.60    3.80
  -2  13  -2    6.00    3.50
  -2  13  -2    1.60    2.60
  -2  13  -2    3.00    3.90
  -2  13  -2    0.40    2.30
  -2  13  -2   10.30    5.70
   2 -13   2   -2.50    2.50
   2 -13   2    1.20    3.30
   2 -13   2    0.10    3.20
   2 -13   2    0.80    3.90
   2 -13   2   -1.90    6.20
   2 -13   2    1.30    3.60
   2 -13   2    5.80    3.60
  -3  13  -2   17.60    5.50
  -3  13  -2    2.10    2.40
  -3  13  -2    8.70    3.60
  -3  13  -2    2.70    2.60
  -3  13  -2   13.10    4.40
   3 -13   2    5.70    3.90
   3 -13   2    9.60    3.70
   3 -13   2    8.20    6.00
   3 -13   2    8.60    4.50
   3 -13   2    3.00    2.50
   3 -13   2    5.40    2.90
  -4  13  -2    2.90    3.60
  -4  13  -2    4.40    4.70
  -4  13  -2    1.30    2.50
  -4  13  -2   -0.60    5.30
  -4  13  -2    2.40    3.00
   4 -13   2    0.50    5.50
   4 -13   2   -2.80    2.60
   4 -13   2   -2.80    5.50
   4 -13   2   -0.60    3.20
   4 -13   2   -0.50    3.90
  -5  13  -2    0.80    3.00
  -5  13  -2   -1.10    2.60
  -5  13  -2    0.50    3.90
  -5  13  -2    1.90    4.20
   5 -13   2   -5.00    3.20
   5 -13   2   -0.50    4.20
   5 -13   2    1.10    2.80
   5 -13   2   -4.50    3.00
   5 -13   2   -2.00    5.80
  -6  13  -2    1.00    2.60
  -6  13  -2   -2.50    2.50
  -6  13  -2    4.10    4.70
  -6  13  -2    5.20    2.80
   6 -13   2   -3.70    3.70
   6 -13   2   -3.20    3.10
   6 -13   2    3.60    2.80
   6 -13   2   -5.70    3.00
   6 -13   2    4.50    5.90
  -7  13  -2    5.60    3.20
  -7  13  -2    1.40    2.60
  -7  13  -2    2.80    4.80
  -7  13  -2    7.40    3.00
   7 -13   2    7.40    3.50
   7 -13   2    0.50    5.30
   7 -13   2    1.10    3.10
   7 -13   2   -0.50    2.70
   7 -13   2    1.50    4.40
  -8  13  -2    2.80    5.00
  -8  13  -2    0.10    2.60
  -8  13  -2    4.20    3.00
   8 -13   2   -1.50    3.00
   8 -13   2    5.00    5.50
   8 -13   2    0.10    2.90
   8 -13   2    1.40    3.00
   8 -13   2    0.30    5.20
  -9  13  -2    5.00    2.90
  -9  13  -2   11.70    5.20
  -9  13  -2    2.30    2.60
  -9  13  -2    0.60    2.90
   9 -13   2    1.00    5.20
   9 -13   2    0.30    3.10
   9 -13   2    4.10    5.40
   9 -13   2    0.80    3.20
  10 -13   2   -5.70    3.00
   4  12  -2    6.50    2.80
   4  12  -2    4.80    4.10
   4  12  -2   11.00    5.00
   4  12  -2   18.40    6.00
   4  12  -2   11.50    3.90
  -4 -12   2   14.40    5.30
  -4 -12   2   10.00    3.90
  -4 -12   2   11.60    3.70
  -4 -12   2    4.90    3.80
   3  12  -2    6.10    2.80
   3  12  -2    9.50    4.40
   3  12  -2    4.80    3.50
   3  12  -2   21.40    4.20
   3  12  -2   24.80    6.30
  -3 -12   2   12.90    3.10
  -3 -12   2    4.40    4.60
  -3 -12   2    9.30    7.50
  -3 -12   2   10.80    3.20
  -3 -12   2    3.30    1.60
  -3 -12   2   11.40    7.40
  -3 -12   2    9.80    3.40
   2  12  -2   38.10    7.30
   2  12  -2   30.20    4.10
   2  12  -2   33.10    5.30
   2  12  -2   35.00    4.70
   2  12  -2   25.40    3.90
  -2 -12   2   24.10    5.60
  -2 -12   2   47.50    8.00
  -2 -12   2   33.10    4.10
  -2 -12   2   38.90    8.80
  -2 -12   2   23.10    3.30
  -2 -12   2   28.70    4.90
  -2 -12   2   48.00    5.10
   1  12  -2   56.99    7.70
   1  12  -2   65.39    5.70
   1  12  -2   52.39    4.70
   1  12  -2   62.89    6.50
   1  12  -2   64.49    5.50
  -1 -12   2   50.79    4.60
  -1 -12   2   57.89    4.70
  -1 -12   2   49.80    4.90
  -1 -12   2   53.09    7.00
  -1 -12   2   53.89    5.00
  -1 -12   2   54.29    8.60
  -1 -12   2   57.09    5.90
   0  12  -2   22.90    4.10
   0  12  -2   21.40    3.70
   0  12  -2   25.30    6.20
   0  12  -2   16.80    3.30
   0  12  -2   15.50    4.30
   0 -12   2   17.10    4.90
   0 -12   2   18.00    3.80
   0 -12   2   19.40    4.20
   0 -12   2   21.20    7.30
   0 -12   2   17.60    3.30
   0 -12   2   16.30    3.40
  -1  12  -2    8.00    2.80
  -1  12  -2    7.30    3.00
  -1  12  -2   12.20    3.10
  -1  12  -2   12.90    5.60
  -1  12  -2    9.70    4.00
   1 -12   2   10.80    4.40
   1 -12   2   11.10    2.90
   1 -12   2   26.00    7.40
   1 -12   2   13.30    3.80
   1 -12   2   13.30    3.10
   1 -12   2   11.80    3.10
   1 -12   2   19.80    3.80
  -2  12  -2   29.90    4.90
  -2  12  -2   39.80    7.20
  -2  12  -2   34.00    3.90
  -2  12  -2   26.60    4.20
  -2  12  -2   34.00    4.40
   2 -12   2   29.20    4.50
   2 -12   2   27.30    4.20
   2 -12   2   28.30    7.60
   2 -12   2   27.60    4.20
   2 -12   2   21.70    3.40
   2 -12   2   33.30    5.40
   2 -12   2   24.80    4.30
  -3  12  -2   26.60    6.70
  -3  12  -2   24.50    3.90
  -3  12  -2   22.00    4.80
   3 -12   2   22.60    6.00
   3 -12   2   18.20    4.70
   3 -12   2   26.70    4.30
   3 -12   2   22.10    3.40
   3 -12   2   13.80    3.70
  -4  12  -2    9.40    3.30
  -4  12  -2   16.60    6.00
  -4  12  -2   17.00    4.50
  -4  12  -2    9.70    3.50
   4 -12   2   12.70    3.70
   4 -12   2   15.80    4.50
   4 -12   2   16.00    6.40
   4 -12   2   15.40    3.00
   4 -12   2    9.20    3.00
  -5  12  -2   19.80    4.60
  -5  12  -2   20.10    6.20
  -5  12  -2   15.60    3.40
  -5  12  -2   19.50    3.60
   5 -12   2   21.60    4.50
   5 -12   2   16.00    6.20
   5 -12   2   20.00    3.30
   5 -12   2   16.10    4.70
   5 -12   2   18.80    3.40
  -6  12  -2   -0.20    2.50
  -6  12  -2    2.60    3.00
  -6  12  -2    3.90    2.80
  -6  12  -2    4.60    4.80
   6 -12   2    1.70    4.30
   6 -12   2    5.10    5.30
   6 -12   2    3.00    2.40
   6 -12   2    1.00    2.70
   6 -12   2    1.80    3.00
  -7  12  -2    3.50    2.70
  -7  12  -2    2.70    2.60
  -7  12  -2    3.00    4.30
  -7  12  -2    0.20    2.80
   7 -12   2    2.70    2.90
   7 -12   2    1.80    5.00
   7 -12   2    3.20    3.10
   7 -12   2   -0.10    4.50
   7 -12   2    5.10    3.00
  -8  12  -2    7.80    5.10
  -8  12  -2   -0.30    2.80
  -8  12  -2    4.40    2.40
   8 -12   2    6.10    4.70
   8 -12   2    2.10    2.90
   8 -12   2    7.10    5.10
   8 -12   2    2.50    3.00
   8 -12   2    1.10    2.90
  -9  12  -2    0.30    4.10
  -9  12  -2   -0.10    2.90
  -9  12  -2    0.40    2.10
   9 -12   2   -1.80    2.80
   9 -12   2   -3.60    2.60
   9 -12   2    6.40    4.80
   9 -12   2   -5.40    5.10
   9 -12   2   -3.70    2.90
 -10  12  -2   -4.20    1.80
 -10  12  -2    4.00    4.40
 -10  12  -2    0.90    3.00
 -10  12  -2    1.80    2.40
  10 -12   2   -0.80    2.80
  10 -12   2    4.70    4.90
  10 -12   2   -4.20    4.00
  10 -12   2   -2.00    3.00
  10 -12   2   -6.90    3.00
   5  11  -2    8.70    6.50
   5  11  -2   22.30    6.60
   5  11  -2    8.50    3.80
   5  11  -2    7.50    4.50
   5  11  -2   17.30    6.80
  -5 -11   2   10.00    4.70
  -5 -11   2    6.70    6.80
  -5 -11   2   12.90    3.70
  -5 -11   2    8.20    3.80
  -5 -11   2   12.00    4.70
   4  11  -2    8.80    3.60
   4  11  -2   18.80    4.70
   4  11  -2   13.60    3.30
   4  11  -2   15.30    4.00
   4  11  -2   21.40    6.40
  -4 -11   2   14.00    7.30
  -4 -11   2    7.20    4.60
  -4 -11   2   15.90    3.50
  -4 -11   2   13.40    4.20
  -4 -11   2   17.40    3.70
  -4 -11   2   14.20    3.50
   3  11  -2   30.30    4.30
   3  11  -2   34.20    4.50
   3  11  -2   27.40    5.00
   3  11  -2   41.90    7.60
   3  11  -2   31.70    4.50
  -3 -11   2   29.40    4.80
  -3 -11   2   27.10    5.70
  -3 -11   2   24.30    2.50
  -3 -11   2   31.80    4.20
  -3 -11   2   29.80    7.70
  -3 -11   2   30.20    4.20
  -3 -11   2   32.60    4.10
   2  11  -2   43.70    5.00
   2  11  -2   33.00    5.10
   2  11  -2   28.30    3.80
   2  11  -2   46.50    7.10
   2  11  -2   32.30    4.20
  -2 -11   2   37.10    8.30
  -2 -11   2   30.70    3.70
  -2 -11   2   31.80    4.00
  -2 -11   2   25.40    5.30
  -2 -11   2   27.60    4.30
  -2 -11   2   19.10    3.20
  -2 -11   2   28.80    4.70
   1  11  -2   56.39    6.00
   1  11  -2   56.89    5.50
   1  11  -2   48.80    4.50
   1  11  -2   61.09    5.00
   1  11  -2   57.69    7.40
  -1 -11   2   52.99    6.50
  -1 -11   2   43.90    4.60
  -1 -11   2   53.69    5.20
  -1 -11   2   56.09    4.80
  -1 -11   2   52.99    9.20
  -1 -11   2   51.79    5.70
   0  11  -2   41.80    5.30
   0  11  -2   39.90    4.50
   0  11  -2   37.70    4.10
   0  11  -2   39.90    4.80
   0  11  -2   40.90    5.80
   0 -11   2   31.70    7.40
   0 -11   2   30.30    8.40
   0 -11   2   30.70    4.20
   0 -11   2   31.50    4.30
   0 -11   2   32.90    4.00
   0 -11   2   34.50    3.90
   0 -11   2   33.30    4.30
  -1  11  -2   64.29    5.30
  -1  11  -2   66.99    6.10
  -1  11  -2   69.89    4.90
  -1  11  -2   64.49    7.60
  -1  11  -2   61.19    5.40
   1 -11   2   60.19    7.70
   1 -11   2   61.59    5.40
   1 -11   2   62.39    5.30
   1 -11   2   67.39    7.00
   1 -11   2   55.99    5.10
   1 -11   2   61.39    5.20
   1 -11   2   64.19    8.20
  -2  11  -2   54.29    4.30
  -2  11  -2   57.19    4.40
  -2  11  -2   68.99    6.10
  -2  11  -2   66.99    4.90
  -2  11  -2   59.09    6.40
   2 -11   2   52.69    4.60
   2 -11   2   64.09    8.10
   2 -11   2   56.09    5.20
   2 -11   2   60.79    5.30
   2 -11   2   61.69    5.40
   2 -11   2   52.89    4.30
  -3  11  -2   57.19    4.50
  -3  11  -2   58.19    5.20
  -3  11  -2   64.69    5.20
  -3  11  -2   68.59    7.40
  -3  11  -2   60.39    6.10
   3 -11   2   62.39    8.90
   3 -11   2   61.39    7.50
   3 -11   2   68.99    5.30
   3 -11   2   64.99    5.00
   3 -11   2   58.79    4.50
  -4  11  -2   58.69    7.30
  -4  11  -2   69.89    5.10
  -4  11  -2   66.19    5.70
  -4  11  -2   58.09    7.10
  -4  11  -2   65.29    4.70
   4 -11   2   72.59    5.30
   4 -11   2   64.89    4.80
   4 -11   2   64.39    6.70
   4 -11   2   68.59    5.30
   4 -11   2   74.49    9.90
  -5  11  -2   53.09    4.50
  -5  11  -2   59.39    4.50
  -5  11  -2   60.19    4.70
  -5  11  -2   56.29    7.30
  -5  11  -2   57.19    6.30
   5 -11   2   50.29    4.80
   5 -11   2   54.19    4.90
   5 -11   2   57.79    4.90
   5 -11   2   54.59    6.60
  -6  11  -2   22.90    3.50
  -6  11  -2   23.50    3.40
  -6  11  -2   25.70    6.10
   6 -11   2   20.20    3.70
   6 -11   2   20.30    3.10
   6 -11   2   21.30    5.20
   6 -11   2   27.00    9.90
  -7  11  -2    5.10    4.90
  -7  11  -2    7.80    2.50
  -7  11  -2    5.50    2.60
  -7  11  -2    9.20    4.60
   7 -11   2    5.40    2.90
   7 -11   2    5.80    2.90
   7 -11   2    6.30    4.40
   7 -11   2    7.10    3.00
   7 -11   2    9.20    5.80
  -8  11  -2   -1.00    2.70
  -8  11  -2    3.20    2.20
  -8  11  -2    6.90    2.70
  -8  11  -2    9.80    4.90
   8 -11   2    9.80    5.10
   8 -11   2    5.40    3.10
   8 -11   2    5.10    3.30
   8 -11   2    3.10    2.90
   8 -11   2    8.30    4.90
  -9  11  -2    3.80    3.00
  -9  11  -2    7.90    4.40
  -9  11  -2    0.10    2.00
  -9  11  -2    3.10    2.50
   9 -11   2   -0.90    2.70
   9 -11   2   -1.10    3.10
   9 -11   2    1.40    4.30
   9 -11   2    1.90    4.00
   9 -11   2    0.50    2.60
 -10  11  -2   -3.00    4.10
 -10  11  -2    5.40    4.60
 -10  11  -2   -3.80    2.80
 -10  11  -2    1.60    2.10
  10 -11   2   -1.30    3.00
  10 -11   2   -5.00    2.40
  10 -11   2   -0.10    4.80
  10 -11   2    3.60    4.40
 -11  11  -2   -0.90    1.50
 -11  11  -2   -4.70    3.80
 -11  11  -2    2.80    3.10
  11 -11   2    4.50    5.10
  11 -11   2    2.80    4.30
  11 -11   2    0.80    3.00
  11 -11   2    4.60    3.70
  11 -11   2    2.70    2.50
   6  10  -2    9.20    5.30
   6  10  -2   -3.50    3.80
   6  10  -2    7.30    3.40
   6  10  -2    5.00    3.20
  -6 -10   2    7.00    4.30
  -6 -10   2   -1.60    6.10
  -6 -10   2    6.30    3.00
  -6 -10   2    5.80    2.80
   5  10  -2    8.60    3.50
   5  10  -2    3.20    3.20
   5  10  -2    6.70    4.20
   5  10  -2    7.00    5.30
   5  10  -2    8.90    3.50
  -5 -10   2    3.80    2.90
  -5 -10   2    1.60    3.90
  -5 -10   2    8.00    6.80
  -5 -10   2    0.50    3.20
  -5 -10   2    2.90    2.70
   4  10  -2   10.20    3.50
   4  10  -2   14.90    5.80
   4  10  -2   10.20    4.30
   4  10  -2   12.50    3.40
   4  10  -2   12.60    4.20
  -4 -10   2   10.80    3.00
  -4 -10   2   18.90    3.40
  -4 -10   2    8.40    3.70
  -4 -10   2   10.10    6.20
  -4 -10   2    6.30    4.20
  -4 -10   2    7.40    3.10
   3  10  -2   28.40    6.80
   3  10  -2   18.30    4.40
   3  10  -2   20.80    5.60
   3  10  -2   16.80    3.60
   3  10  -2   19.40    3.90
  -3 -10   2   18.70    4.10
  -3 -10   2   18.60    3.50
  -3 -10   2   26.30    5.30
  -3 -10   2   17.20    7.20
  -3 -10   2   15.00    2.10
  -3 -10   2   18.50    3.60
  -3 -10   2   20.90    3.60
   2  10  -2   19.20    3.70
   2  10  -2   22.90    6.20
   2  10  -2   21.10    3.40
   2  10  -2   28.90    4.70
   2  10  -2   25.00    4.00
  -2 -10   2   19.80    4.80
  -2 -10   2   23.50    3.90
  -2 -10   2   23.70    3.60
  -2 -10   2   21.80    3.70
  -2 -10   2   22.10    4.00
  -2 -10   2   26.90    7.00
   1  10  -2   10.70    5.60
   1  10  -2   16.10    3.20
   1  10  -2   10.90    3.70
   1  10  -2   14.70    3.50
   1  10  -2   12.90    3.40
  -1 -10   2   17.00    3.60
  -1 -10   2   21.00    3.40
  -1 -10   2   13.10    3.40
  -1 -10   2   12.40    3.10
  -1 -10   2   10.70    4.10
  -1 -10   2   16.30    6.40
  -1 -10   2   15.10    5.60
   0  10  -2   43.80    5.50
   0  10  -2   46.70    6.90
   0  10  -2   53.29    5.00
   0  10  -2   36.00    3.80
   0  10  -2   52.99    4.50
   0 -10   2   50.69    5.00
   0 -10   2   51.69    4.90
   0 -10   2   57.39    4.50
   0 -10   2   49.10    8.30
   0 -10   2   42.10    5.20
   0 -10   2   51.39    5.20
   0 -10   2   54.29    4.40
  -1  10  -2  110.19    7.10
  -1  10  -2  117.29    6.20
  -1  10  -2  112.09    5.50
  -1  10  -2   95.89    9.70
  -1  10  -2  108.19    5.50
   1 -10   2  100.19    8.90
   1 -10   2  114.59    6.00
   1 -10   2  102.79    5.40
   1 -10   2  109.09    7.20
   1 -10   2  116.49    6.40
   1 -10   2  101.69    5.30
   1 -10   2  115.59    5.70
  -2  10  -2  137.49    6.00
  -2  10  -2  140.39    6.60
  -2  10  -2  128.69    5.80
  -2  10  -2  126.99    9.30
  -2  10  -2  127.59    7.50
   2 -10   2  134.29    9.60
   2 -10   2  134.79    7.80
   2 -10   2  122.49    5.80
   2 -10   2  132.19    6.10
   2 -10   2  132.69    6.50
  -3  10  -2  156.78    6.50
  -3  10  -2  162.68    6.40
  -3  10  -2  161.08    9.80
  -3  10  -2  131.09    7.10
  -3  10  -2  157.68    8.20
   3 -10   2  160.18    6.90
   3 -10   2  154.68    9.80
   3 -10   2  155.38    6.90
   3 -10   2  160.98    6.60
   3 -10   2  155.28    8.40
  -4  10  -2   91.59    5.10
  -4  10  -2   93.59    5.40
  -4  10  -2   80.29    6.50
  -4  10  -2   83.19    7.50
  -4  10  -2   86.69    5.30
   4 -10   2   92.89    6.90
   4 -10   2   79.79    6.90
   4 -10   2   93.79    5.50
   4 -10   2   95.99    7.20
   4 -10   2   84.79    5.10
  -5  10  -2   94.39    5.30
  -5  10  -2  104.59    5.40
  -5  10  -2   97.39    8.00
  -5  10  -2  101.99    5.30
  -5  10  -2   98.69    6.40
   5 -10   2   99.89    5.60
   5 -10   2   93.19    5.40
   5 -10   2  105.09    5.70
   5 -10   2  101.79   11.20
   5 -10   2  102.59    8.20
  -6  10  -2   20.70    5.30
  -6  10  -2   13.10    3.10
  -6  10  -2   10.90    2.80
  -6  10  -2   14.40    2.70
   6 -10   2   14.20    4.50
   6 -10   2   13.60    2.70
   6 -10   2   18.90    5.50
   6 -10   2   17.40    3.30
   6 -10   2   15.40    3.20
  -7  10  -2   50.99    4.50
  -7  10  -2   38.90    6.20
  -7  10  -2   48.70    3.90
   7 -10   2   42.40    6.10
   7 -10   2   55.99    5.20
   7 -10   2   48.00    6.50
   7 -10   2   49.10    4.50
   7 -10   2   46.70    4.30
  -8  10  -2   15.50    4.10
  -8  10  -2   12.40    5.70
  -8  10  -2   21.40    5.50
  -8  10  -2   23.30    3.20
  -8  10  -2   18.20    2.80
   8 -10   2   17.30    3.10
   8 -10   2   22.40    4.70
   8 -10   2   19.70    5.20
   8 -10   2   24.00    3.60
   8 -10   2   15.60    3.50
  -9  10  -2    8.80    2.40
  -9  10  -2   18.90    8.60
  -9  10  -2    8.30    3.90
  -9  10  -2    9.90    2.30
  -9  10  -2   13.10    3.50
   9 -10   2   12.20    3.40
   9 -10   2   12.80    3.20
   9 -10   2    8.20    4.90
   9 -10   2    8.00    3.40
   9 -10   2   11.80    4.90
 -10  10  -2    7.60    1.90
 -10  10  -2    4.80    3.10
 -10  10  -2   13.40    5.00
 -10  10  -2    6.90    2.10
 -10  10  -2    1.20    4.20
  10 -10   2    4.50    4.40
  10 -10   2    9.50    4.30
  10 -10   2    8.30    3.40
  10 -10   2   11.20    3.10
 -11  10  -2   -0.30    3.30
 -11  10  -2   -0.30    1.30
 -11  10  -2    4.60    1.40
  11 -10   2    6.80    5.10
  11 -10   2    7.00    2.90
  11 -10   2   -1.10    3.30
  11 -10   2    0.90    4.10
  11 -10   2   -0.40    3.40
   7   9  -2   -5.60    3.80
   7   9  -2    1.70    3.50
   7   9  -2    9.20    5.20
   7   9  -2   -1.80    2.70
  -7  -9   2   -0.80    2.60
  -7  -9   2    5.10    4.00
  -7  -9   2    6.60    6.20
  -7  -9   2    7.30    4.10
  -7  -9   2   -1.60    2.50
   6   9  -2   -1.30    3.80
   6   9  -2   -1.90    2.60
   6   9  -2    3.60    3.00
   6   9  -2    4.50    4.90
   6   9  -2    1.60    2.90
  -6  -9   2   -1.40    3.20
  -6  -9   2   -6.30    5.20
  -6  -9   2   -3.50    2.30
  -6  -9   2    0.30    3.60
  -6  -9   2    0.60    3.20
   5   9  -2    1.10    2.10
   5   9  -2    2.60    2.90
   5   9  -2    3.40    4.70
   5   9  -2   -4.60    3.50
   5   9  -2    0.40    2.70
  -5  -9   2   -2.50    2.90
  -5  -9   2   -1.10    3.80
  -5  -9   2   -0.80    2.30
  -5  -9   2    3.90    2.80
  -5  -9   2   -6.70    5.20
   4   9  -2   15.50    5.30
   4   9  -2    7.70    3.10
   4   9  -2    4.40    3.50
   4   9  -2    5.80    2.50
   4   9  -2   12.20    3.40
  -4  -9   2    8.40    3.20
  -4  -9   2    8.90    5.10
  -4  -9   2    9.90    3.70
  -4  -9   2    7.60    2.70
  -4  -9   2    7.60    6.00
   3   9  -2    3.80    2.80
   3   9  -2    2.90    3.30
   3   9  -2    7.50    3.20
   3   9  -2    9.90    5.40
   3   9  -2    2.40    3.10
  -3  -9   2    2.90    1.60
  -3  -9   2    0.30    2.70
  -3  -9   2    6.70    4.00
  -3  -9   2   10.10    7.60
  -3  -9   2    3.40    2.10
  -3  -9   2    2.00    3.20
  -3  -9   2    6.30    2.90
   2   9  -2   12.90    3.40
   2   9  -2   17.40    3.80
   2   9  -2   10.50    3.00
   2   9  -2    8.90    5.20
   2   9  -2   13.10    3.30
  -2  -9   2   13.40    3.50
  -2  -9   2    7.30    2.50
  -2  -9   2   12.90    2.60
  -2  -9   2   17.50    3.40
  -2  -9   2   11.90    4.10
  -2  -9   2   14.80    3.20
  -2  -9   2   15.70    6.50
   1   9  -2   14.00    5.10
   1   9  -2   16.60    3.20
   1   9  -2   16.20    2.80
   1   9  -2   18.10    3.50
   1   9  -2   24.40    4.20
  -1  -9   2   18.30    3.50
  -1  -9   2   22.20    3.30
  -1  -9   2   15.50    4.10
  -1  -9   2   17.60    3.50
  -1  -9   2   25.30    3.40
  -1  -9   2   22.20    3.70
  -1  -9   2   20.50    6.60
   0   9  -2   69.39    4.70
   0   9  -2   68.69    7.40
   0   9  -2   71.59    5.20
   0   9  -2   68.29    4.40
   0   9  -2   62.99    5.80
   0  -9   2   67.89    4.60
   0  -9   2   71.69    5.00
   0  -9   2   65.99    4.30
   0  -9   2   71.09    4.40
   0  -9   2   73.69    4.80
   0  -9   2   75.19    6.00
   0  -9   2   70.79    6.70
  -1   9  -2   68.09    5.00
  -1   9  -2   57.89    7.00
  -1   9  -2   61.79    5.60
  -1   9  -2   73.09    5.10
  -1   9  -2   69.19    4.50
   1  -9   2   66.59    4.90
   1  -9   2   71.79    4.80
   1  -9   2   72.09    5.00
   1  -9   2   66.99    5.10
   1  -9   2   71.99    7.60
   1  -9   2   70.19    4.60
   1  -9   2   67.99    5.70
  -2   9  -2   50.79    4.60
  -2   9  -2   57.29    5.40
  -2   9  -2   48.80    3.80
  -2   9  -2   55.39    4.10
  -2   9  -2   45.10    6.50
   2  -9   2   49.00    4.70
   2  -9   2   63.19    4.70
   2  -9   2   51.99    5.50
   2  -9   2   57.29    7.00
   2  -9   2   50.99    4.20
  -3   9  -2  141.89    5.90
  -3   9  -2  143.89    8.20
  -3   9  -2  139.89    7.30
  -3   9  -2  150.58    6.30
  -3   9  -2  145.39    6.30
   3  -9   2  158.98    7.50
   3  -9   2  136.09    8.90
   3  -9   2  149.09    6.30
   3  -9   2  142.99    5.90
   3  -9   2  144.39    7.70
  -4   9  -2  114.69    5.50
  -4   9  -2  110.39    7.10
  -4   9  -2  114.79    7.90
  -4   9  -2  115.09    5.50
  -4   9  -2  120.59    5.40
   4  -9   2  111.49    8.00
   4  -9   2  110.49    5.50
   4  -9   2  106.19    5.60
   4  -9   2  110.79    7.30
   4  -9   2  117.39    5.80
  -5   9  -2  129.19    7.10
  -5   9  -2  147.49    6.30
  -5   9  -2  142.39    8.70
  -5   9  -2  144.69    5.90
   5  -9   2  155.28    6.40
   5  -9   2  138.19    8.50
   5  -9   2  157.18    6.60
   5  -9   2  159.98    8.60
   5  -9   2  139.59    6.20
  -6   9  -2   56.39    6.50
  -6   9  -2   61.59    4.70
  -6   9  -2   55.39    5.70
  -6   9  -2   57.89    4.70
  -6   9  -2   57.19    4.10
   6  -9   2   61.69    4.60
   6  -9   2   59.99    6.50
   6  -9   2   57.99    4.50
   6  -9   2   53.99    5.80
   6  -9   2   53.09    4.70
  -7   9  -2   23.70    3.60
  -7   9  -2   17.50    2.70
  -7   9  -2   22.60    5.40
  -7   9  -2   13.20    2.50
  -7   9  -2   18.10    4.50
   7  -9   2   21.20    4.40
   7  -9   2   20.00    5.00
   7  -9   2   16.30    3.30
   7  -9   2   14.30    3.00
  -8   9  -2   81.69    4.30
  -8   9  -2   70.19    6.70
  -8   9  -2   72.79    5.40
  -8   9  -2   86.89    7.30
  -8   9  -2   73.29    4.00
   8  -9   2   74.19    5.00
   8  -9   2   68.49    6.40
   8  -9   2   70.39    7.50
   8  -9   2   73.99    4.70
   8  -9   2   67.99    6.70
  -9   9  -2   51.49    4.90
  -9   9  -2   44.30    5.90
  -9   9  -2   51.59    3.70
  -9   9  -2   52.39    6.40
   9  -9   2   41.30    6.60
   9  -9   2   42.10    4.60
   9  -9   2   49.10    5.90
   9  -9   2   48.00    4.10
 -10   9  -2   21.40    5.10
 -10   9  -2   22.40    2.30
 -10   9  -2   25.80    4.00
  10  -9   2   25.30    4.10
  10  -9   2   27.10    5.00
  10  -9   2   25.70    3.20
  10  -9   2   25.20    6.10
  10  -9   2   23.10    3.30
 -11   9  -2    2.90    3.60
  11  -9   2    7.10    3.90
  11  -9   2    2.90    3.30
  11  -9   2    0.70    2.50
  11  -9   2    4.40    7.60
  11  -9   2    2.40    2.40
  11  -9   2   13.40    4.70
 -12   9  -2   -2.30    3.30
  12  -9   2   11.70    3.70
  12  -9   2    6.50    2.80
  12  -9   2   15.40    5.00
  12  -9   2    4.90    5.20
  12  -9   2    7.20    2.40
   8   8  -2   -1.40    2.60
   8   8  -2   -3.50    3.10
   8   8  -2   -8.30    4.10
   8   8  -2    3.90    2.90
   8   8  -2    9.90    5.20
  -8  -8   2   -2.70    3.00
  -8  -8   2    6.50    4.00
  -8  -8   2   -3.90    2.40
  -8  -8   2   12.10    6.40
  -8  -8   2    1.20    2.40
   7   8  -2   -0.80    2.60
   7   8  -2   -3.70    3.70
   7   8  -2   -2.40    3.00
   7   8  -2    0.70    2.60
   7   8  -2    6.90    4.90
  -7  -8   2   -1.10    3.10
  -7  -8   2    8.10    4.00
  -7  -8   2   -2.20    2.20
  -7  -8   2    1.30    5.70
   6   8  -2   -4.10    3.70
   6   8  -2    0.90    3.10
   6   8  -2    4.80    2.80
   6   8  -2   -0.90    2.60
   6   8  -2    2.80    4.60
  -6  -8   2   -1.80    2.90
  -6  -8   2   -0.70    2.20
  -6  -8   2   -0.80    5.40
  -6  -8   2    1.50    3.80
  -6  -8   2    0.70    2.70
   5   8  -2    2.80    3.70
   5   8  -2    6.20    2.90
   5   8  -2    5.30    2.70
   5   8  -2    7.60    3.10
   5   8  -2   12.50    5.10
  -5  -8   2    5.00    2.90
  -5  -8   2    3.20    3.90
  -5  -8   2    1.10    2.50
  -5  -8   2    6.10    3.20
  -5  -8   2    8.60    6.20
   4   8  -2   -0.40    5.00
   4   8  -2    3.10    2.80
   4   8  -2   -1.30    2.80
   4   8  -2    1.80    3.20
   4   8  -2    0.30    2.60
  -4  -8   2   -2.50    2.30
  -4  -8   2   -2.50    3.50
  -4  -8   2    0.60    2.70
  -4  -8   2    0.60    2.90
  -4  -8   2   -7.10    4.70
   3   8  -2    0.20    2.00
   3   8  -2   -5.00    4.70
   3   8  -2   -0.10    2.30
   3   8  -2   -6.80    2.50
   3   8  -2   -0.50    3.00
  -3  -8   2   -4.40    2.40
  -3  -8   2  -10.30    4.80
  -3  -8   2   -2.70    3.40
  -3  -8   2   -0.90    2.40
  -3  -8   2   -3.50    2.40
  -3  -8   2   -0.40    1.50
  -3  -8   2   -3.10    2.90
   2   8  -2   -3.40    4.40
   2   8  -2    1.90    2.80
   2   8  -2    3.30    2.90
   2   8  -2   -2.80    2.40
   2   8  -2   -0.20    2.90
  -2  -8   2   -0.10    3.50
  -2  -8   2    3.10    2.90
  -2  -8   2   -1.00    2.60
  -2  -8   2    0.90    2.60
  -2  -8   2    1.20    2.30
  -2  -8   2   -2.80    2.00
  -2  -8   2    1.90    5.40
   1   8  -2   16.90    5.60
   1   8  -2   17.20    3.60
   1   8  -2   22.30    3.40
   1   8  -2   23.10    3.10
   1   8  -2   17.90    3.40
  -1  -8   2   21.80    3.30
  -1  -8   2   20.60    3.30
  -1  -8   2   26.00    5.40
  -1  -8   2   26.20    3.20
  -1  -8   2   19.40    3.30
  -1  -8   2   23.10    3.00
  -1  -8   2   24.50    4.00
   0   8  -2   42.40    4.30
   0   8  -2   38.40    3.70
   0   8  -2   46.00    4.40
   0   8  -2   32.80    4.50
   0   8  -2   37.70    6.20
   0  -8   2   38.60    3.90
   0  -8   2   49.60    4.30
   0  -8   2   38.10    3.80
   0  -8   2   44.30    6.70
   0  -8   2   48.60    4.40
   0  -8   2   39.80    4.80
   0  -8   2   46.90    3.80
  -1   8  -2   91.59    4.70
  -1   8  -2   95.99    5.80
  -1   8  -2  102.39    6.30
  -1   8  -2   93.29    7.30
  -1   8  -2   89.89    4.50
   1  -8   2   89.79    7.30
   1  -8   2   95.59    4.60
   1  -8   2   96.59    6.10
   1  -8   2  100.79    5.30
   1  -8   2  100.19    4.80
  -2   8  -2   11.90    2.80
  -2   8  -2   11.20    4.50
  -2   8  -2    9.50    3.30
  -2   8  -2   10.70    2.30
  -2   8  -2   12.20    2.40
   2  -8   2    9.80    2.40
   2  -8   2   12.60    5.00
   2  -8   2   10.20    2.80
   2  -8   2   12.40    2.30
   2  -8   2   11.30    3.10
  -3   8  -2   43.50    3.60
  -3   8  -2   41.20    3.20
  -3   8  -2   45.40    5.80
  -3   8  -2   47.00    4.00
  -3   8  -2   39.10    4.70
   3  -8   2   44.50    3.40
   3  -8   2   45.50    5.20
   3  -8   2   43.70    3.60
   3  -8   2   51.89    4.10
   3  -8   2   40.50    5.80
  -4   8  -2   49.80    3.90
  -4   8  -2   42.30    5.60
  -4   8  -2   48.10    3.90
  -4   8  -2   50.39    3.90
  -4   8  -2   58.49    5.40
   4  -8   2   44.90    3.50
   4  -8   2   67.89    4.40
   4  -8   2   53.19    4.10
   4  -8   2   51.99    5.60
   4  -8   2   54.29    6.00
  -5   8  -2   67.39    4.10
  -5   8  -2   66.29    4.10
  -5   8  -2   58.99    4.60
  -5   8  -2   61.99    4.40
  -5   8  -2   73.39    6.60
   5  -8   2   80.89    4.60
   5  -8   2   64.69    6.30
   5  -8   2   68.49    6.40
   5  -8   2   67.99    4.50
   5  -8   2   71.29    4.70
  -6   8  -2  186.88    6.40
  -6   8  -2  206.68    9.90
  -6   8  -2  212.88    6.90
  -6   8  -2  186.78    8.00
  -6   8  -2  211.18    7.50
   6  -8   2  187.58    8.90
   6  -8   2  205.48    7.00
   6  -8   2  201.78    9.50
   6  -8   2  191.38    6.90
   6  -8   2  205.18    7.70
  -7   8  -2   33.60    5.50
  -7   8  -2   22.60    4.40
  -7   8  -2   28.00    3.70
   7  -8   2   28.90    3.50
   7  -8   2   31.90    5.50
   7  -8   2   32.30    3.30
   7  -8   2   29.90    3.90
  -8   8  -2   66.19    6.30
  -8   8  -2   64.59    3.90
  -8   8  -2   61.79    3.60
  -8   8  -2   56.69    6.30
  -8   8  -2   74.19    5.00
   8  -8   2   60.79    4.20
   8  -8   2   62.09    7.00
   8  -8   2   58.79    4.90
   8  -8   2   68.49    4.60
   8  -8   2   68.89    6.20
  -9   8  -2   60.49    5.00
  -9   8  -2   57.89    3.40
  -9   8  -2   55.89    3.10
  -9   8  -2   53.29    6.40
   9  -8   2   61.19    4.50
   9  -8   2   65.19    5.90
   9  -8   2   55.69    5.20
   9  -8   2   50.89    4.80
   9  -8   2   53.59    7.00
 -10   8  -2   25.50    5.30
 -10   8  -2   28.10    2.00
  10  -8   2   33.50    3.50
  10  -8   2   36.80    4.70
  10  -8   2   31.30    6.20
  10  -8   2   39.90    5.10
  10  -8   2   39.10    3.90
 -11   8  -2    9.50    4.40
  11  -8   2   10.10    4.80
  11  -8   2   11.80    2.90
  11  -8   2   15.70    4.00
  11  -8   2   13.20    2.70
  11  -8   2    8.60    3.60
  11  -8   2   19.60    5.60
 -12   8  -2    0.10    4.30
  12  -8   2    6.80    4.40
  12  -8   2    4.90    2.80
  12  -8   2   11.40    5.10
  12  -8   2    7.20    5.00
  12  -8   2    6.60    2.50
  12  -8   2   13.20    3.60
   9   7  -2    9.00    3.90
   9   7  -2   -1.80    4.70
   9   7  -2    4.80    2.90
   9   7  -2   11.10    4.10
  -9  -7   2    4.40    2.30
  -9  -7   2   11.90    4.10
  -9  -7   2   23.60    6.50
   8   7  -2    5.90    3.10
   8   7  -2    9.00    3.50
   8   7  -2    2.00    4.50
   8   7  -2    7.30    3.20
   8   7  -2   13.60    5.20
  -8  -7   2    7.10    2.80
  -8  -7   2    9.00    4.10
  -8  -7   2    3.70    2.50
  -8  -7   2    9.10    4.30
  -8  -7   2    9.30    5.70
   7   7  -2   -1.00    2.20
   7   7  -2   -5.40    2.20
   7   7  -2   -0.40    4.40
   7   7  -2    2.00    3.90
   7   7  -2    0.10    2.40
  -7  -7   2    6.10    2.40
  -7  -7   2    2.40    3.00
  -7  -7   2   -0.30    2.30
  -7  -7   2    2.30    5.50
  -7  -7   2    1.00    3.60
   6   7  -2   13.10    3.00
   6   7  -2   10.90    4.10
   6   7  -2   10.90    5.10
   6   7  -2   11.30    3.50
   6   7  -2   12.00    2.90
  -6  -7   2   10.80    2.70
  -6  -7   2   10.20    4.30
  -6  -7   2   12.70    3.50
  -6  -7   2   14.10    6.40
   5   7  -2   13.20    3.90
   5   7  -2    8.60    4.80
   5   7  -2   14.40    3.60
   5   7  -2    9.60    3.20
   5   7  -2   13.50    3.10
  -5  -7   2   19.10    6.10
  -5  -7   2   13.50    3.30
  -5  -7   2   14.50    2.70
  -5  -7   2    8.70    4.20
  -5  -7   2   15.20    2.90
   4   7  -2    6.40    4.70
   4   7  -2    8.00    2.30
   4   7  -2   11.90    3.60
   4   7  -2    2.90    2.60
   4   7  -2   16.30    3.30
  -4  -7   2    5.30    5.70
  -4  -7   2   10.40    2.80
  -4  -7   2    8.40    2.60
  -4  -7   2    5.30    3.20
  -4  -7   2   10.70    1.00
  -4  -7   2    8.60    2.60
  -4  -7   2    8.60    4.00
   3   7  -2    0.20    2.50
   3   7  -2   -0.30    1.90
   3   7  -2   -2.20    2.40
   3   7  -2    1.50    3.00
   3   7  -2   -1.70    4.50
  -3  -7   2   -1.90    2.30
  -3  -7   2   -3.60    2.40
  -3  -7   2    2.90    2.40
  -3  -7   2   -1.10    5.30
  -3  -7   2   -1.80    1.90
  -3  -7   2    2.70    1.50
  -3  -7   2    0.40    3.40
   2   7  -2   23.30    3.60
   2   7  -2   22.60    5.50
   2   7  -2   26.40    2.90
   2   7  -2   23.40    3.30
   2   7  -2   27.50    3.10
  -2  -7   2   19.50    6.00
  -2  -7   2   27.60    2.80
  -2  -7   2   25.10    3.20
  -2  -7   2   26.20    2.80
  -2  -7   2   24.60    3.40
  -2  -7   2   29.00    3.30
  -2  -7   2   24.60    4.10
   1   7  -2   12.90    3.00
   1   7  -2   14.80    2.40
   1   7  -2   14.50    4.10
   1   7  -2    7.20    2.80
   1   7  -2   11.50    2.30
  -1  -7   2   13.80    2.40
  -1  -7   2   12.10    2.60
  -1  -7   2   13.30    5.10
  -1  -7   2   16.30    3.30
  -1  -7   2   11.30    2.30
  -1  -7   2   11.20    2.70
  -1  -7   2   12.10    2.20
   0   7  -2   -2.20    2.30
   0   7  -2    3.10    2.00
   0   7  -2   -1.00    2.90
   0   7  -2    3.30    1.90
   0   7  -2   -0.90    2.40
   0  -7   2    3.60    4.00
   0  -7   2    4.70    2.70
   0  -7   2    0.80    3.80
   0  -7   2    2.30    2.10
   0  -7   2    0.10    2.00
   0  -7   2    1.80    1.90
   0  -7   2    0.30    1.80
  -1   7  -2   12.10    4.30
  -1   7  -2    9.80    2.10
  -1   7  -2   11.10    2.50
  -1   7  -2   14.80    2.70
  -1   7  -2   11.50    2.90
   1  -7   2   13.60    3.40
   1  -7   2   11.90    3.00
   1  -7   2   12.00    2.10
   1  -7   2   16.00    2.40
   1  -7   2   15.30    3.90
  -2   7  -2    3.00    2.20
  -2   7  -2   -1.40    2.10
  -2   7  -2    1.60    1.70
  -2   7  -2    2.90    2.60
  -2   7  -2   -1.40    3.60
   2  -7   2    1.60    2.10
   2  -7   2    2.80    1.80
   2  -7   2    1.30    2.50
   2  -7   2    0.80    1.60
   2  -7   2    0.80    3.70
  -3   7  -2   -1.70    3.20
  -3   7  -2    1.60    2.70
  -3   7  -2    5.40    2.00
  -3   7  -2    3.80    2.20
  -3   7  -2    2.10    1.60
   3  -7   2    4.20    2.90
   3  -7   2    2.80    2.20
   3  -7   2    2.50    1.60
   3  -7   2    5.00    3.60
   3  -7   2    2.90    2.10
  -4   7  -2   16.80    3.30
  -4   7  -2   24.10    4.50
  -4   7  -2   21.00    2.80
  -4   7  -2   13.10    2.50
  -4   7  -2   18.60    3.80
   4  -7   2   19.20    2.90
   4  -7   2   18.10    2.70
   4  -7   2   21.60    4.10
   4  -7   2   20.20    4.50
   4  -7   2   22.00    2.40
  -5   7  -2   24.50    3.10
  -5   7  -2   18.90    4.50
  -5   7  -2   21.10    2.60
  -5   7  -2   18.60    2.80
  -5   7  -2   17.40    3.30
   5  -7   2   27.80    3.30
   5  -7   2   17.10    2.70
   5  -7   2   24.20    2.90
   5  -7   2   23.50    4.70
   5  -7   2   25.70    4.50
  -6   7  -2   28.90    2.80
  -6   7  -2   28.60    3.50
  -6   7  -2   25.30    2.70
  -6   7  -2   37.60    5.40
  -6   7  -2   28.20    3.80
   6  -7   2   29.90    4.40
   6  -7   2   28.00    3.00
   6  -7   2   26.50    3.50
   6  -7   2   28.20    4.80
   6  -7   2   35.40    3.50
  -7   7  -2   69.49    5.00
  -7   7  -2   72.59    3.70
  -7   7  -2   74.69    3.90
  -7   7  -2   68.49    6.30
  -7   7  -2   67.29    6.10
   7  -7   2   75.79    4.60
   7  -7   2   78.59    4.30
   7  -7   2   75.99    7.10
   7  -7   2   68.39    5.90
   7  -7   2   72.39    5.20
  -8   7  -2   62.59    4.80
  -8   7  -2   53.89    8.10
  -8   7  -2   59.49    3.50
  -8   7  -2   59.19    5.90
  -8   7  -2   54.39    3.20
   8  -7   2   68.59    5.10
   8  -7   2   43.80    5.70
   8  -7   2   60.99    5.60
   8  -7   2   67.29    5.20
  -9   7  -2   24.10    2.40
  -9   7  -2   14.40    4.60
  -9   7  -2   28.10    2.20
   9  -7   2   21.50    2.70
   9  -7   2   31.10    4.70
   9  -7   2   25.40    4.00
   9  -7   2   24.20    5.50
   9  -7   2   24.70    3.10
 -10   7  -2    9.60    4.30
  10  -7   2   20.60    4.80
  10  -7   2   25.50    4.40
  10  -7   2   19.30    2.80
  10  -7   2   20.00    3.90
  10  -7   2   20.80    2.90
  10  -7   2   22.80    5.40
 -11   7  -2    1.20    4.00
  11  -7   2   11.60    5.10
  11  -7   2    4.90    2.60
  11  -7   2   11.00    2.50
  11  -7   2   11.70    5.10
  11  -7   2   13.00    3.60
  11  -7   2   10.60    3.50
 -12   7  -2    3.60    4.80
  12  -7   2   12.20    5.30
  12  -7   2    7.40    3.80
  12  -7   2    7.50    2.40
  12  -7   2    5.70    4.70
  12  -7   2   12.30    3.30
  12  -7   2    7.90    3.10
  12  -7   2    4.90    3.60
   9   6  -2    6.40    4.80
   9   6  -2   -1.50    2.50
  -9  -6   2    0.70    3.40
  -9  -6   2    9.80    4.00
  -9  -6   2    4.40    4.80
  -9  -6   2   -1.10    3.00
   8   6  -2    5.60    3.00
   8   6  -2    3.90    4.50
   8   6  -2    0.90    4.10
   8   6  -2    3.80    2.30
  -8  -6   2    6.30    4.00
  -8  -6   2   10.80    5.70
  -8  -6   2    7.30    3.30
  -8  -6   2    1.80    2.00
  -8  -6   2    7.70    2.30
   7   6  -2    9.20    4.10
   7   6  -2   20.90    8.10
   7   6  -2   16.80    2.80
   7   6  -2   14.70    3.10
   7   6  -2   16.90    2.80
  -7  -6   2   15.50    5.90
  -7  -6   2   10.90    2.50
  -7  -6   2   16.10    3.70
  -7  -6   2   12.00    2.40
  -7  -6   2   17.40    5.40
   6   6  -2   43.70    4.00
   6   6  -2   48.50    5.00
   6   6  -2   60.49    6.70
   6   6  -2   52.59    6.00
   6   6  -2   35.20    3.50
  -6  -6   2   48.30    7.10
  -6  -6   2   63.59    5.10
  -6  -6   2   49.10    3.60
  -6  -6   2   48.60    3.50
  -6  -6   2   48.10    6.10
   5   6  -2    6.00    5.00
   5   6  -2    3.60    2.50
   5   6  -2    8.00    2.90
   5   6  -2    2.70    2.50
   5   6  -2    0.10    3.20
  -5  -6   2    3.70    2.50
  -5  -6   2    2.00    2.50
  -5  -6   2    5.10    2.90
  -5  -6   2    2.90    5.10
  -5  -6   2    6.80    3.90
   4   6  -2   14.90    2.80
   4   6  -2   14.00    5.00
   4   6  -2    8.60    2.60
   4   6  -2   10.40    2.90
   4   6  -2   16.10    3.60
  -4  -6   2   14.60    1.30
  -4  -6   2   20.80    5.80
  -4  -6   2   19.70    2.70
  -4  -6   2   16.60    2.60
  -4  -6   2   19.00    4.30
  -4  -6   2   16.10    3.40
  -4  -6   2   13.60    3.00
   3   6  -2   33.30    3.30
   3   6  -2   35.90    3.60
   3   6  -2   36.40    3.60
   3   6  -2   36.00    5.70
   3   6  -2   42.10    4.40
  -3  -6   2   40.20    4.70
  -3  -6   2   34.80    3.40
  -3  -6   2   35.90    2.20
  -3  -6   2   45.80    6.60
  -3  -6   2   31.60    3.90
  -3  -6   2   37.10    3.70
   2   6  -2  117.69    7.30
   2   6  -2  119.49    5.10
   2   6  -2  112.19    4.60
   2   6  -2  121.29    5.10
   2   6  -2  120.09    5.80
  -2  -6   2  112.59    6.00
  -2  -6   2  102.29    4.10
  -2  -6   2  114.39    7.50
  -2  -6   2  119.89    4.70
  -2  -6   2  114.49    4.80
  -2  -6   2  116.49    5.00
  -2  -6   2  114.49    4.90
   1   6  -2   91.19    4.10
   1   6  -2   88.89    4.30
   1   6  -2   95.79    4.80
   1   6  -2   95.49    4.50
   1   6  -2   90.19    6.20
  -1  -6   2   89.59    6.50
  -1  -6   2   92.89    3.80
  -1  -6   2   92.99    4.40
  -1  -6   2   85.39    4.20
  -1  -6   2  100.99    4.30
  -1  -6   2   86.19    4.80
  -1  -6   2   94.99    4.30
   0   6  -2   32.50    4.80
   0   6  -2   30.70    2.50
   0   6  -2   31.70    3.30
   0   6  -2   29.80    2.80
   0   6  -2   29.20    2.60
   0  -6   2   32.60    2.60
   0  -6   2   28.40    2.50
   0  -6   2   28.90    3.30
   0  -6   2   30.30    2.70
   0  -6   2   34.20    5.00
   0  -6   2   26.90    2.70
   0  -6   2   28.20    2.80
  -1   6  -2  101.29    4.40
  -1   6  -2   98.89    4.80
  -1   6  -2   93.49    5.90
  -1   6  -2   96.89    3.90
  -1   6  -2   99.89    4.00
   1  -6   2   92.89    3.90
   1  -6   2  101.29    4.90
   1  -6   2   97.69    4.30
   1  -6   2  105.29    4.10
   1  -6   2   93.69    6.00
  -2   6  -2  151.78    5.30
  -2   6  -2  151.38    5.30
  -2   6  -2  157.38    6.10
  -2   6  -2  158.88    5.10
  -2   6  -2  154.08    7.10
   2  -6   2  147.69    6.20
   2  -6   2  156.78    5.20
   2  -6   2  151.18    7.10
   2  -6   2  146.49    5.30
   2  -6   2  160.88    5.40
  -3   6  -2  125.39    4.70
  -3   6  -2  133.69    6.60
  -3   6  -2  119.99    4.30
  -3   6  -2  131.69    5.90
  -3   6  -2  126.19    4.70
  -3   6  -2  124.99    5.30
   3  -6   2  127.09    4.80
   3  -6   2  133.19    4.90
   3  -6   2  132.79    6.10
   3  -6   2  125.69    4.80
   3  -6   2  136.39    6.60
  -4   6  -2   -2.80    1.70
  -4   6  -2   -0.40    1.70
  -4   6  -2   -6.10    1.80
  -4   6  -2   -1.70    1.70
  -4   6  -2   -0.70    2.80
   4  -6   2   -1.50    1.80
   4  -6   2   -2.40    2.80
   4  -6   2   -3.90    1.70
   4  -6   2   -0.50    2.00
   4  -6   2   -4.40    2.70
  -5   6  -2   -0.50    2.70
  -5   6  -2    3.30    3.20
  -5   6  -2    2.50    1.70
  -5   6  -2    1.90    1.80
  -5   6  -2    0.10    2.20
   5  -6   2    2.70    2.00
   5  -6   2    4.90    2.40
   5  -6   2    2.00    3.10
   5  -6   2    6.10    2.10
   5  -6   2    3.10    3.50
  -6   6  -2   -0.70    1.70
  -6   6  -2    0.20    3.30
  -6   6  -2    1.70    2.30
  -6   6  -2    1.00    1.90
  -6   6  -2   -1.40    2.30
   6  -6   2    1.80    3.70
   6  -6   2   -1.60    3.10
   6  -6   2    0.70    2.20
   6  -6   2    1.60    2.20
   6  -6   2    2.40    2.60
  -7   6  -2   22.00    4.30
  -7   6  -2   15.60    3.40
  -7   6  -2   20.90    3.40
  -7   6  -2   19.10    2.20
  -7   6  -2   17.50    2.40
   7  -6   2   15.00    2.70
   7  -6   2   13.10    2.60
   7  -6   2   16.20    4.60
   7  -6   2   17.10    3.20
   7  -6   2   19.90    3.90
  -8   6  -2   28.30    4.80
  -8   6  -2   28.30    2.30
  -8   6  -2   32.00    3.80
   8  -6   2   29.40    4.40
   8  -6   2   29.60    3.10
   8  -6   2   26.60    2.90
   8  -6   2   23.20    6.10
   8  -6   2   31.00    4.00
  -9   6  -2   12.00    1.20
  -9   6  -2   10.90    1.30
   9  -6   2   10.10    4.70
   9  -6   2   16.10    3.70
   9  -6   2   17.20    4.80
   9  -6   2   11.30    3.40
   9  -6   2   16.00    2.50
   9  -6   2   14.30    2.60
 -10   6  -2   10.60    4.30
  10  -6   2   17.90    5.40
  10  -6   2   12.30    3.50
  10  -6   2   12.50    2.50
  10  -6   2   21.30    3.90
  10  -6   2   16.10    2.50
  10  -6   2   23.40    5.50
 -11   6  -2    7.20    4.50
  11  -6   2    6.90    3.50
  11  -6   2   12.20    3.20
  11  -6   2    4.70    4.70
  11  -6   2    5.80    4.80
  11  -6   2   10.90    3.80
  11  -6   2    9.10    2.50
 -12   6  -2    6.50    4.20
  12  -6   2   15.00    4.50
  12  -6   2   15.10    3.90
  12  -6   2   12.60    4.60
  12  -6   2   10.60    2.50
  12  -6   2   23.30    3.50
  10   5  -2    7.00    2.60
  10   5  -2    3.50    4.50
  10   5  -2    2.10    3.30
  10   5  -2    2.10    2.40
  10   5  -2   -3.30    4.50
 -10  -5   2    4.70    3.70
   9   5  -2    3.60    2.40
   9   5  -2   -4.90    4.00
   9   5  -2   -3.10    4.20
   9   5  -2    3.30    2.20
   9   5  -2    0.70    2.70
  -9  -5   2    5.50    4.00
  -9  -5   2    0.40    5.00
  -9  -5   2    1.80    1.70
   8   5  -2   -6.60    6.60
   8   5  -2    0.70    2.40
   8   5  -2   -0.80    2.40
   8   5  -2    0.10    2.60
   8   5  -2    0.10    5.10
  -8  -5   2    0.80    3.30
  -8  -5   2    6.50    5.10
  -8  -5   2   -1.30    1.70
  -8  -5   2   -0.60    3.00
  -8  -5   2   -0.10    1.70
   7   5  -2    1.10    2.40
   7   5  -2   -7.20    3.20
   7   5  -2   -2.00    1.90
   7   5  -2    2.00    4.50
   7   5  -2    0.60    2.20
  -7  -5   2    3.70    5.00
  -7  -5   2    0.60    2.00
  -7  -5   2    2.70    1.90
  -7  -5   2    2.60    3.50
  -7  -5   2    0.60    2.80
   6   5  -2    9.50    2.80
   6   5  -2    8.40    2.40
   6   5  -2   12.30    5.00
   6   5  -2   14.60    4.00
   6   5  -2   -0.50    2.80
  -6  -5   2   11.20    2.70
  -6  -5   2   11.40    5.40
  -6  -5   2   13.50    4.00
  -6  -5   2   11.00    3.20
  -6  -5   2   10.50    2.10
   5   5  -2   22.10    5.20
   5   5  -2   13.30    3.00
   5   5  -2   14.00    2.50
   5   5  -2   18.40    3.90
   5   5  -2   13.00    2.80
  -5  -5   2   17.10    2.60
  -5  -5   2   15.80    3.20
  -5  -5   2   19.50    5.40
  -5  -5   2   18.50    4.20
  -5  -5   2   15.00    2.50
   4   5  -2  147.59    5.40
   4   5  -2  141.89    7.90
   4   5  -2  153.78    6.10
   4   5  -2  146.89    6.90
   4   5  -2  142.39    5.40
  -4  -5   2  147.39    5.20
  -4  -5   2  138.69    8.70
  -4  -5   2  139.09    7.20
  -4  -5   2  141.79    6.10
  -4  -5   2  147.69    5.20
  -4  -5   2  130.29    3.60
  -4  -5   2  147.09    6.00
   3   5  -2   66.99    3.80
   3   5  -2   64.49    5.60
   3   5  -2   72.79    4.20
   3   5  -2   70.19    4.70
   3   5  -2   71.19    3.80
  -3  -5   2   70.19    4.20
  -3  -5   2   65.89    3.60
  -3  -5   2   65.19    3.60
  -3  -5   2   65.89    4.20
  -3  -5   2   67.39    6.20
  -3  -5   2   71.99    5.10
  -3  -5   2   65.49    2.60
   2   5  -2  103.29    4.80
   2   5  -2  105.99    4.00
   2   5  -2  106.29    6.10
   2   5  -2   99.09    3.90
   2   5  -2  101.59    4.40
  -2  -5   2  105.79    4.30
  -2  -5   2  107.79    6.70
  -2  -5   2  109.69    4.50
  -2  -5   2   98.39    3.70
  -2  -5   2  105.89    4.40
  -2  -5   2  102.09    4.20
  -2  -5   2  107.09    5.20
   1   5  -2  213.48    6.30
   1   5  -2  206.38    6.30
   1   5  -2  213.68    6.30
   1   5  -2  213.38    8.00
  -1  -5   2  205.58    5.90
  -1  -5   2  202.38    6.20
  -1  -5   2  221.28    6.20
  -1  -5   2  216.78    7.00
  -1  -5   2  216.58    6.40
  -1  -5   2  213.18    6.10
  -1  -5   2  206.48    8.20
   0   5  -2  225.68    7.00
   0   5  -2  221.98    8.40
   0   5  -2  228.68    7.30
   0   5  -2  232.08    6.60
   0   5  -2  235.18    6.50
   0  -5   2  232.28    6.40
   0  -5   2  228.58    6.50
   0  -5   2  232.98    6.50
   0  -5   2  233.78    8.60
   0  -5   2  228.58    7.00
   0  -5   2  228.28    7.00
  -1   5  -2  132.99    5.80
  -1   5  -2  135.19    4.40
  -1   5  -2  134.89    6.20
  -1   5  -2  122.89    4.20
  -1   5  -2  129.29    5.80
   1  -5   2  129.19    6.10
   1  -5   2  129.99    5.00
   1  -5   2  128.39    4.30
   1  -5   2  123.79    4.20
   1  -5   2  128.09    4.30
  -2   5  -2  106.29    5.40
  -2   5  -2  111.39    4.10
  -2   5  -2  104.79    4.30
  -2   5  -2  111.59    4.10
  -2   5  -2  120.59    4.10
  -2   5  -2  115.49    4.90
   2  -5   2  108.69    3.90
   2  -5   2  110.69    4.90
   2  -5   2  106.99    4.10
   2  -5   2  111.09    4.00
   2  -5   2  110.49    5.40
  -3   5  -2   21.00    2.20
  -3   5  -2   19.80    2.10
  -3   5  -2   20.60    2.60
  -3   5  -2   19.80    2.70
  -3   5  -2   23.50    3.50
   3  -5   2   23.30    2.30
   3  -5   2   22.90    3.10
   3  -5   2   21.20    3.30
   3  -5   2   24.90    2.50
   3  -5   2   21.10    2.20
  -4   5  -2  197.78    7.40
  -4   5  -2  197.08    6.70
  -4   5  -2  198.28    6.30
  -4   5  -2  188.88    5.60
  -4   5  -2  197.48    5.60
   4  -5   2  193.78    5.80
   4  -5   2  208.68    6.50
   4  -5   2  200.08    7.50
   4  -5   2  196.58    5.90
   4  -5   2  195.68    7.70
  -5   5  -2   23.40    3.80
  -5   5  -2   25.40    3.00
  -5   5  -2   24.40    3.00
  -5   5  -2   25.60    2.20
  -5   5  -2   24.30    2.20
   5  -5   2   24.40    3.60
   5  -5   2   22.20    3.80
   5  -5   2   22.20    2.50
   5  -5   2   21.80    2.90
   5  -5   2   22.20    2.30
  -6   5  -2    5.20    3.20
  -6   5  -2    5.10    3.20
  -6   5  -2    8.50    2.60
  -6   5  -2    6.30    1.60
   6  -5   2    5.40    3.20
   6  -5   2    2.90    2.90
   6  -5   2    6.30    2.10
   6  -5   2    7.00    2.10
   6  -5   2    9.60    2.60
  -7   5  -2   -1.60    1.30
  -7   5  -2    1.00    2.80
  -7   5  -2   -2.50    2.40
   7  -5   2   -1.40    1.70
   7  -5   2    0.70    2.70
   7  -5   2    0.00    2.70
   7  -5   2   -1.30    3.00
   7  -5   2    0.20    2.10
  -8   5  -2    0.80    1.30
  -8   5  -2   -0.10    3.20
  -8   5  -2    2.00    1.20
   8  -5   2    0.00    2.70
   8  -5   2    1.50    3.40
   8  -5   2    0.40    4.30
   8  -5   2   -1.00    2.00
   8  -5   2   -0.80    2.40
  -9   5  -2    1.60    3.00
   9  -5   2    1.90    1.90
   9  -5   2    4.30    4.20
   9  -5   2    1.00    2.00
   9  -5   2    1.90    3.00
   9  -5   2    5.80    2.90
   9  -5   2   -0.30    4.00
 -10   5  -2   -1.30    3.50
  10  -5   2    4.50    2.10
  10  -5   2    2.50    3.30
  10  -5   2   -2.40    4.20
  10  -5   2   -1.10    2.00
  10  -5   2    2.50    2.70
  10  -5   2   -1.30    2.90
  10  -5   2    3.30    4.30
 -11   5  -2    0.50    4.20
  11  -5   2    9.30    2.20
  11  -5   2    3.50    4.40
  11  -5   2    9.20    3.50
  11  -5   2    6.30    4.90
  11  -5   2    8.40    3.40
  11  -5   2   13.40    3.00
  11  -5   2    3.70    2.30
 -12   5  -2    1.40    4.40
  12  -5   2    1.40    2.90
  12  -5   2    6.60    4.30
  12  -5   2    7.80    2.50
  12  -5   2    5.30    2.10
  12  -5   2    4.60    5.60
  11   4  -2    5.50    4.70
  11   4  -2    6.30    2.40
  11   4  -2    4.90    3.30
  10   4  -2   14.40    5.30
  10   4  -2   16.30    2.70
  10   4  -2   12.40    3.70
  10   4  -2    5.50    5.10
  10   4  -2   15.80    2.80
 -10  -4   2   13.70    4.20
   9   4  -2   -3.20    2.60
   9   4  -2    0.90    2.10
   9   4  -2   -1.40    4.10
   9   4  -2   -3.20    4.20
   9   4  -2   -1.50    2.00
  -9  -4   2    1.70    3.10
  -9  -4   2   -1.30    1.00
   8   4  -2    3.00    2.40
   8   4  -2   -1.30    2.00
   8   4  -2   -1.00    3.90
   8   4  -2   -0.20    2.00
   8   4  -2    2.40    4.30
  -8  -4   2    2.10    3.10
  -8  -4   2    2.20    4.50
  -8  -4   2    2.10    1.60
  -8  -4   2    0.80    1.50
   7   4  -2   -0.50    4.20
   7   4  -2   -3.10    3.50
   7   4  -2    2.10    3.70
  -7  -4   2    1.40    1.80
  -7  -4   2   -0.30    3.40
  -7  -4   2    0.40    1.70
  -7  -4   2   -1.10    2.50
  -7  -4   2    3.30    4.70
   6   4  -2    3.10    3.50
   6   4  -2   -0.50    2.10
   6   4  -2   -6.30    2.50
   6   4  -2    2.70    4.30
   6   4  -2   -2.00    1.80
  -6  -4   2   -1.70    3.30
  -6  -4   2    0.90    4.70
  -6  -4   2   -2.00    1.70
  -6  -4   2   -0.10    1.70
  -6  -4   2   -0.30    2.50
   5   4  -2   17.40    3.70
   5   4  -2   16.90    2.60
   5   4  -2   22.50    5.00
   5   4  -2   16.00    2.30
   5   4  -2   18.40    2.60
  -5  -4   2   16.30    2.90
  -5  -4   2   19.50    5.10
  -5  -4   2   19.20    2.30
  -5  -4   2   15.60    2.00
  -5  -4   2   16.50    1.40
  -5  -4   2   14.50    3.80
   4   4  -2   89.39    4.50
   4   4  -2   84.79    3.80
   4   4  -2   88.79    5.40
   4   4  -2   89.09    6.10
   4   4  -2   85.89    3.80
  -4  -4   2   83.79    2.60
  -4  -4   2   91.59    6.70
  -4  -4   2   84.39    3.80
  -4  -4   2   85.59    3.60
  -4  -4   2   82.79    4.50
  -4  -4   2   93.99    4.60
  -4  -4   2   82.89    5.50
   3   4  -2   47.70    2.90
   3   4  -2   45.70    3.30
   3   4  -2   50.49    4.80
   3   4  -2   44.10    2.90
   3   4  -2   46.90    3.60
  -3  -4   2   43.40    1.90
  -3  -4   2   49.99    5.10
  -3  -4   2   41.10    3.10
  -3  -4   2   45.50    3.00
  -3  -4   2   42.30    2.90
  -3  -4   2   41.60    3.20
  -3  -4   2   46.40    4.00
   2   4  -2   -1.10    2.50
   2   4  -2    1.90    1.60
   2   4  -2    0.80    1.50
   2   4  -2    1.70    1.70
   2   4  -2    2.30    1.60
  -2  -4   2    2.90    3.40
  -2  -4   2    1.30    1.50
  -2  -4   2   -0.20    1.40
  -2  -4   2    1.50    1.90
  -2  -4   2   -1.30    1.40
  -2  -4   2   -0.20    1.10
   1   4  -2  254.07    6.80
   1   4  -2  250.17    7.10
   1   4  -2  256.27    6.90
   1   4  -2  255.67    6.80
   1   4  -2  251.07    8.60
  -1  -4   2  246.28    6.50
  -1  -4   2  247.28    6.70
  -1  -4   2  260.67    6.60
  -1  -4   2  252.27    8.80
  -1  -4   2  253.57    6.80
  -1  -4   2  266.57    6.90
  -1  -4   2  258.97    7.30
   0   4  -2  120.49    4.40
   0   4  -2  119.89    4.10
   0   4  -2  118.59    3.90
   0   4  -2  117.59    5.70
   0   4  -2  117.09    3.90
   0  -4   2  116.79    3.90
   0  -4   2  120.89    5.80
   0  -4   2  119.09    4.20
   0  -4   2  120.09    3.90
   0  -4   2  122.99    4.10
   0  -4   2  119.79    4.50
  -1   4  -2  208.08    7.30
  -1   4  -2  206.78    5.70
  -1   4  -2  218.18    6.50
  -1   4  -2  203.48    5.60
  -1   4  -2  216.18    5.80
   1  -4   2  211.18    7.30
   1  -4   2  215.58    5.80
   1  -4   2  211.28    5.70
   1  -4   2  212.38    6.40
   1  -4   2  210.18    5.90
  -2   4  -2  190.58    5.30
  -2   4  -2  197.58    9.20
  -2   4  -2  183.28    6.10
  -2   4  -2  183.78    5.30
  -2   4  -2  187.88    5.70
  -2   4  -2  184.88    5.40
   2  -4   2  180.18    5.30
   2  -4   2  193.48    5.50
   2  -4   2  191.08    5.60
   2  -4   2  188.38    6.30
  -3   4  -2   10.90    1.60
  -3   4  -2   12.40    3.10
  -3   4  -2    6.80    1.80
  -3   4  -2    8.20    1.70
  -3   4  -2   11.80    2.10
   3  -4   2   11.00    1.60
   3  -4   2   12.40    1.70
   3  -4   2   11.50    2.00
   3  -4   2   10.00    2.10
   3  -4   2   10.50    2.90
  -4   4  -2   55.39    3.30
  -4   4  -2   48.70    2.50
  -4   4  -2   50.79    3.70
  -4   4  -2   50.09    2.60
   4  -4   2   47.50    5.20
   4  -4   2   55.39    3.40
   4  -4   2   49.60    4.30
   4  -4   2   52.39    2.70
   4  -4   2   54.09    2.80
  -5   4  -2   13.10    1.60
  -5   4  -2   11.30    2.90
  -5   4  -2   11.60    1.70
  -5   4  -2   10.90    2.60
  -5   4  -2    9.50    2.20
   5  -4   2   13.30    2.30
   5  -4   2   12.50    2.70
   5  -4   2   12.80    1.90
   5  -4   2    8.20    1.80
  -6   4  -2   57.39    5.00
  -6   4  -2   63.69    2.70
  -6   4  -2   71.19    4.30
   6  -4   2   65.29    4.20
   6  -4   2   62.39    3.40
   6  -4   2   65.99    3.40
   6  -4   2   61.79    3.80
  -7   4  -2   35.40    4.70
  -7   4  -2   35.00    2.40
  -7   4  -2   35.40    2.10
   7  -4   2   42.00    3.20
   7  -4   2   37.50    5.40
   7  -4   2   37.30    4.00
   7  -4   2   39.10    3.20
  -8   4  -2   10.20    4.00
  -8   4  -2   11.10    1.00
  -8   4  -2   10.20    1.00
   8  -4   2    9.90    2.20
   8  -4   2   15.30    2.40
   8  -4   2    9.00    3.00
   8  -4   2    3.50    4.70
   8  -4   2   11.30    2.90
  -9   4  -2   -2.60    3.50
   9  -4   2    4.80    3.20
   9  -4   2    5.60    3.10
   9  -4   2    2.70    2.00
   9  -4   2    2.20    2.60
   9  -4   2   -0.40    1.80
   9  -4   2    2.50    4.40
 -10   4  -2   -0.90    3.70
  10  -4   2    1.20    3.00
  10  -4   2   -1.60    1.90
  10  -4   2    1.10    3.10
  10  -4   2   -0.50    4.40
  10  -4   2   -1.20    1.90
  10  -4   2    0.70    2.40
 -11   4  -2   -1.30    2.90
  11  -4   2    6.50    2.50
  11  -4   2    0.20    2.00
  11  -4   2   -2.40    2.70
  11  -4   2    6.10    4.90
  11  -4   2    0.40    1.90
  11  -4   2    0.90    3.00
 -12   4  -2   -2.60    3.90
  12  -4   2    6.80    2.30
  12  -4   2    7.10    8.30
  12  -4   2   -1.40    1.80
  12  -4   2    3.90    4.10
  12  -4   2   -2.00    3.30
  11   3  -2    4.60    5.10
  11   3  -2   13.80    5.20
  11   3  -2   12.40    2.40
  11   3  -2   12.90    2.60
  11   3  -2   13.50    3.90
  11   3  -2   13.40    4.00
 -11  -3   2   16.30    4.50
  10   3  -2   15.20    2.60
  10   3  -2   16.50    3.70
  10   3  -2   16.30    2.50
  10   3  -2   16.00    5.30
  10   3  -2   12.40    5.10
 -10  -3   2   15.70    4.90
   9   3  -2   13.90    3.50
   9   3  -2   18.80    5.30
   9   3  -2   17.60    2.50
   9   3  -2   23.90    5.50
   9   3  -2   15.80    2.50
  -9  -3   2   19.30    4.00
   8   3  -2   50.89    4.80
   8   3  -2   52.99    3.50
   8   3  -2   52.39    6.10
   8   3  -2   49.80    3.50
   8   3  -2   55.29    6.40
  -8  -3   2   46.40    2.30
  -8  -3   2   49.20    5.00
  -8  -3   2   46.80    2.10
   7   3  -2   -1.70    1.80
   7   3  -2    0.60    1.90
   7   3  -2    1.90    2.90
   7   3  -2    1.30    4.30
   7   3  -2    6.40    3.70
  -7  -3   2    1.00    1.30
  -7  -3   2    0.10    1.50
  -7  -3   2    5.30    4.70
  -7  -3   2   -1.40    3.30
  -7  -3   2    3.30    2.70
   6   3  -2    2.90    1.80
   6   3  -2    0.60    1.80
   6   3  -2    1.20    3.30
   6   3  -2    0.80    4.20
   6   3  -2    0.80    2.30
  -6  -3   2   -3.70    4.00
  -6  -3   2    0.80    1.40
  -6  -3   2    0.10    1.10
  -6  -3   2   -1.30    2.40
  -6  -3   2    1.00    3.20
  -6  -3   2   -0.30    1.50
   5   3  -2    0.80    3.70
   5   3  -2    0.10    1.50
   5   3  -2    3.40    3.00
   5   3  -2   -0.10    1.70
   5   3  -2    1.20    2.30
  -5  -3   2    0.10    2.10
  -5  -3   2   -4.60    2.60
  -5  -3   2    0.20    1.00
  -5  -3   2   -5.50    3.60
  -5  -3   2    0.00    1.40
   4   3  -2   -0.30    1.40
   4   3  -2   -0.80    1.90
   4   3  -2    0.60    2.30
   4   3  -2   -0.60    1.50
   4   3  -2   -1.10    3.10
  -4  -3   2    0.90    0.90
  -4  -3   2   -0.50    3.30
  -4  -3   2   -1.80    1.30
  -4  -3   2   -1.10    1.10
  -4  -3   2   -2.00    2.20
   3   3  -2    2.70    3.00
   3   3  -2    4.00    2.00
   3   3  -2    0.60    1.60
   3   3  -2    1.60    1.30
   3   3  -2    1.50    1.50
  -3  -3   2   -1.10    1.60
  -3  -3   2    1.60    0.90
  -3  -3   2    4.80    2.20
  -3  -3   2    1.60    1.20
  -3  -3   2    2.30    1.50
  -3  -3   2    0.40    1.20
  -3  -3   2    0.20    2.90
   2   3  -2   66.19    3.20
   2   3  -2   58.49    3.00
   2   3  -2   58.39    4.40
   2   3  -2   53.69    2.60
   2   3  -2   54.09    3.10
  -2  -3   2   56.39    2.70
  -2  -3   2   54.69    3.00
  -2  -3   2   60.49    4.10
  -2  -3   2   57.29    3.50
  -2  -3   2   60.79    2.60
  -2  -3   2   51.79    2.20
  -2  -3   2   54.49    3.00
   1   3  -2   58.09    2.90
   1   3  -2   55.29    2.40
   1   3  -2   54.49    2.70
   1   3  -2   54.79    5.00
   1   3  -2   54.79    3.20
  -1  -3   2   52.49    2.60
  -1  -3   2   53.59    2.50
  -1  -3   2   52.89    6.60
  -1  -3   2   59.29    3.00
  -1  -3   2   57.89    2.40
  -1  -3   2   54.79    4.10
  -1  -3   2   55.59    2.70
   0   3  -2   72.49    2.90
   0   3  -2   72.79    2.80
   0   3  -2   74.69    2.70
   0   3  -2   68.79    2.90
   0  -3   2   70.39    2.90
   0  -3   2   75.19    2.90
   0  -3   2   76.49    4.10
   0  -3   2   76.49    2.90
   0  -3   2   76.09    3.00
   0  -3   2   72.19    2.80
  -1   3  -2   75.19    2.70
  -1   3  -2   74.39    3.20
  -1   3  -2   77.69    2.90
  -1   3  -2   76.29    2.90
  -1   3  -2   78.39    3.70
  -1   3  -2   78.99    2.90
   1  -3   2   79.69    3.40
   1  -3   2   77.89    3.00
   1  -3   2   76.69    2.70
   1  -3   2   74.99    3.70
   1  -3   2   75.99    2.90
  -2   3  -2   99.99    4.10
  -2   3  -2   92.19    3.70
  -2   3  -2   88.39    3.20
  -2   3  -2  102.19    3.80
   2  -3   2   95.89    3.40
   2  -3   2   93.39    4.30
   2  -3   2   95.99    3.40
   2  -3   2  101.69    4.20
   2  -3   2   94.19    3.40
  -3   3  -2  772.52   19.00
  -3   3  -2  798.62   17.10
  -3   3  -2  788.32   18.10
  -3   3  -2  786.72   17.70
  -3   3  -2  787.92   17.00
   3  -3   2  787.22   17.20
   3  -3   2  794.92   17.70
   3  -3   2  788.92   18.00
   3  -3   2  767.32   17.60
  -4   3  -2    7.40    1.50
  -4   3  -2   10.70    1.40
  -4   3  -2   11.10    2.10
  -4   3  -2   11.50    2.20
  -4   3  -2   11.90    2.00
   4  -3   2   10.10    2.00
   4  -3   2   10.00    1.70
   4  -3   2    8.80    1.40
   4  -3   2    9.00    1.50
  -5   3  -2  249.28    8.20
  -5   3  -2  230.58    7.10
  -5   3  -2  243.68    6.00
   5  -3   2  235.58    7.20
   5  -3   2  235.48    6.50
   5  -3   2  254.37    7.50
   5  -3   2  248.18    6.50
  -6   3  -2   69.09    2.90
  -6   3  -2   66.49    5.10
  -6   3  -2   67.49    2.60
   6  -3   2   64.19    3.40
   6  -3   2   67.69    6.10
   6  -3   2   66.49    3.90
   6  -3   2   69.79    3.90
   6  -3   2   74.09    3.40
  -7   3  -2   85.79    2.90
  -7   3  -2   86.79    2.80
  -7   3  -2   84.89    6.10
   7  -3   2   89.79    7.30
   7  -3   2   82.59    5.20
   7  -3   2   85.59    4.00
   7  -3   2   87.19    3.90
   7  -3   2   83.89    4.60
  -8   3  -2   19.30    3.70
   8  -3   2   20.50    5.30
   8  -3   2   23.90    3.40
   8  -3   2   23.40    2.50
   8  -3   2   21.80    2.60
   8  -3   2   23.60    3.80
  -9   3  -2   16.90    4.50
   9  -3   2   25.20    3.60
   9  -3   2   25.80    2.70
   9  -3   2   24.80    2.70
   9  -3   2   27.80    4.00
   9  -3   2   26.20    3.30
   9  -3   2   26.50    5.60
 -10   3  -2    0.10    3.80
  10  -3   2    9.20    4.50
  10  -3   2    5.00    2.50
  10  -3   2    3.60    2.00
  10  -3   2    4.80    3.30
  10  -3   2    0.70    2.70
  10  -3   2    0.70    1.90
 -11   3  -2    2.10    4.20
  11  -3   2   -2.60    2.50
  11  -3   2    3.00    4.70
  11  -3   2    1.80    2.00
  11  -3   2    0.20    2.90
  11  -3   2   -1.00    1.80
  11  -3   2    4.10    2.30
 -12   3  -2    1.20    4.30
  12  -3   2   10.80    4.00
  12  -3   2    8.20    2.20
  12  -3   2   -0.20    2.30
  12  -3   2    3.50    2.10
  11   2  -2    6.00    4.90
  11   2  -2   17.20    8.20
  11   2  -2   11.40    2.30
  11   2  -2   11.50    2.30
  11   2  -2   10.50    3.90
  11   2  -2   19.30    6.60
 -11  -2   2    7.70    3.90
  10   2  -2   25.70    2.70
  10   2  -2   25.10    4.10
  10   2  -2   28.00    5.60
  10   2  -2   27.80    5.80
  10   2  -2   30.50    3.00
 -10  -2   2   27.50    4.60
   9   2  -2   19.10    3.60
   9   2  -2   15.90    2.30
   9   2  -2    8.90    4.60
   9   2  -2   16.30    2.30
   9   2  -2   18.70    5.10
  -9  -2   2   23.60    4.20
   8   2  -2   37.00    4.40
   8   2  -2   31.60    2.90
   8   2  -2   34.30    4.30
   8   2  -2   40.90    6.00
   8   2  -2   39.30    5.60
  -8  -2   2   39.20    4.90
   7   2  -2  149.19    4.80
   7   2  -2  143.69    6.40
   7   2  -2  143.89    8.30
   7   2  -2  142.09    8.00
   7   2  -2  149.79    4.90
  -7  -2   2  147.99    6.70
  -7  -2   2  143.29    3.70
  -7  -2   2  143.79    3.60
  -7  -2   2  140.69    4.60
   6   2  -2  108.89    4.00
   6   2  -2  113.59    6.70
   6   2  -2  114.99    5.40
   6   2  -2  106.89    3.90
   6   2  -2  109.29    6.90
  -6  -2   2  103.09    3.70
  -6  -2   2  107.29    3.30
  -6  -2   2  113.59    5.50
  -6  -2   2  115.79    7.20
  -6  -2   2  106.49    3.40
  -6  -2   2  109.59    6.40
   5   2  -2  161.48    5.80
   5   2  -2  167.48    7.10
   5   2  -2  160.58    4.70
   5   2  -2  158.18    7.60
   5   2  -2  161.08    4.60
  -5  -2   2  157.18    7.50
  -5  -2   2  153.88    6.70
  -5  -2   2  155.98    4.20
  -5  -2   2  155.68    5.70
  -5  -2   2  155.08    4.30
  -5  -2   2  151.08    4.40
   4   2  -2  342.27    8.90
   4   2  -2  333.47   10.60
   4   2  -2  333.27    7.90
   4   2  -2  327.87   10.80
   4   2  -2  329.07    7.90
  -4  -2   2  334.27   10.80
  -4  -2   2  318.17    7.70
  -4  -2   2  328.87    7.70
  -4  -2   2  324.97    9.60
  -4  -2   2  352.36    8.90
  -4  -2   2  320.57    7.70
   3   2  -2  646.74   16.60
   3   2  -2  652.63   14.90
   3   2  -2  659.53   14.20
   3   2  -2  638.34   15.40
   3   2  -2  660.33   14.20
  -3  -2   2  623.74   14.00
  -3  -2   2  651.53   16.80
  -3  -2   2  652.93   15.60
  -3  -2   2  657.23   14.80
  -3  -2   2  653.23   14.90
  -3  -2   2  679.93   14.10
  -3  -2   2  645.04   14.10
   2   2  -2  192.58    4.90
   2   2  -2  214.38    6.90
   2   2  -2  185.18    6.80
   2   2  -2  188.98    5.50
  -2  -2   2  192.18    4.80
  -2  -2   2  187.68    5.00
  -2  -2   2  192.48    5.60
  -2  -2   2  185.68    4.70
  -2  -2   2  195.38    6.90
   1   2  -2  590.94   14.20
   1   2  -2  593.94   12.50
   1   2  -2  608.14   13.00
   1   2  -2  594.44   12.90
  -1  -2   2  594.04   14.40
  -1  -2   2  610.74   12.90
  -1  -2   2  595.04   13.00
  -1  -2   2  592.64   12.60
  -1  -2   2  573.94   12.90
   0   2  -2   93.89    2.70
   0   2  -2   97.29    2.50
   0   2  -2   94.59    2.80
   0   2  -2   93.69    2.80
   0   2  -2   93.09    3.50
   0   2  -2   94.79    2.70
   0  -2   2   95.59    2.70
   0  -2   2   93.89    2.90
   0  -2   2   95.49    2.80
   0  -2   2   95.19    3.40
   0  -2   2  100.99    2.80
   0  -2   2   97.89    2.80
   0  -2   2  105.49    2.70
  -1   2  -2  115.39    3.30
  -1   2  -2  109.09    3.10
  -1   2  -2  117.19    3.60
  -1   2  -2  112.79    3.20
  -1   2  -2  121.29    3.30
   1  -2   2  113.89    3.30
   1  -2   2  111.79    3.10
   1  -2   2  112.29    3.60
   1  -2   2  112.09    3.20
   1  -2   2  112.79    3.50
  -2   2  -2  850.91   18.40
  -2   2  -2  826.72   17.70
  -2   2  -2  811.22   18.10
   2  -2   2  845.52   18.10
   2  -2   2  813.32   17.70
  -3   2  -2   62.19    2.40
  -3   2  -2   56.29    3.50
  -3   2  -2   61.29    2.90
  -3   2  -2   67.79    2.60
  -3   2  -2   59.09    3.20
   3  -2   2   60.49    2.60
   3  -2   2   60.49    2.70
   3  -2   2   63.29    3.30
   3  -2   2   65.69    2.80
  -4   2  -2   44.20    2.00
  -4   2  -2   44.50    2.20
  -4   2  -2   43.70    3.00
  -4   2  -2   42.90    3.50
   4  -2   2   35.20    3.90
   4  -2   2   45.20    2.50
   4  -2   2   44.50    2.40
   4  -2   2   45.80    2.30
   4  -2   2   50.79    3.10
  -5   2  -2   88.99    5.00
  -5   2  -2   95.19    3.10
  -5   2  -2   93.39    3.00
   5  -2   2   92.09    3.50
   5  -2   2   87.69    3.70
   5  -2   2   92.59    5.30
   5  -2   2   95.09    3.50
   5  -2   2   88.99    4.00
  -6   2  -2  104.19    5.80
  -6   2  -2  114.09    3.30
  -6   2  -2  107.59    3.40
   6  -2   2  105.19    4.50
   6  -2   2  102.29    6.20
   6  -2   2  109.89    4.10
   6  -2   2  118.09    5.30
   6  -2   2  111.69    4.10
   6  -2   2  108.09    5.00
  -7   2  -2   84.69    2.70
  -7   2  -2   84.99    2.70
  -7   2  -2   82.79    5.80
   7  -2   2   84.79    6.90
   7  -2   2   86.99    4.00
   7  -2   2   83.89    7.00
   7  -2   2   83.39    3.80
   7  -2   2   90.39    5.20
  -8   2  -2   29.80    4.80
   8  -2   2   25.60    5.60
   8  -2   2   35.20    3.00
   8  -2   2   29.20    3.40
   8  -2   2   35.80    3.00
   8  -2   2   32.10    3.90
   8  -2   2   33.90    4.00
  -9   2  -2    6.60    3.80
   9  -2   2   11.10    4.70
   9  -2   2   12.10    2.20
   9  -2   2   13.30    2.90
   9  -2   2   11.90    2.30
   9  -2   2   18.60    3.70
   9  -2   2   13.30    3.20
 -10   2  -2    5.50    3.90
  10  -2   2    2.90    3.30
  10  -2   2    6.20    2.00
  10  -2   2    4.30    2.40
  10  -2   2    3.30    2.90
  10  -2   2    6.50    2.20
  10  -2   2    5.70    4.90
 -11   2  -2   -2.80    3.30
  11  -2   2   -0.70    1.80
  11  -2   2    2.90    2.90
  11  -2   2    5.70    4.90
  11  -2   2    2.00    2.10
  11  -2   2    1.30    2.00
  11  -2   2   -0.50    2.70
 -12   2  -2   -1.00    3.70
  12  -2   2   -0.90    2.80
  12  -2   2    5.00    2.20
  12  -2   2   -0.80    1.90
  12  -2   2    7.60    8.60
  12  -2   2    3.10    3.40
  12  -2   2    0.40    3.10
  12  -2   2    0.30    2.20
  12  -2   2    9.40    2.40
  12   1  -2    3.10    3.40
  12   1  -2    9.70    4.20
  12   1  -2    3.70    1.70
  12   1  -2    3.60    3.60
  12   1  -2    0.70    5.30
  12   1  -2    4.30    1.70
 -12  -1   2    2.00    3.70
  11   1  -2   12.30    5.30
  11   1  -2   11.60    2.20
  11   1  -2   17.30    4.00
  11   1  -2   13.70    3.80
  11   1  -2   15.20    5.10
 -11  -1   2   10.70    4.00
  10   1  -2   28.20    3.80
  10   1  -2   39.60    6.30
  10   1  -2   32.90    5.90
  10   1  -2   28.30    2.70
  10   1  -2   28.20    2.70
  10   1  -2   29.10    4.00
 -10  -1   2   29.90    4.80
   9   1  -2   38.60    2.80
   9   1  -2   40.80    5.90
   9   1  -2   40.00    6.20
   9   1  -2   38.20    2.90
   9   1  -2   35.40    4.00
  -9  -1   2   32.00    4.40
   8   1  -2   49.40    2.90
   8   1  -2   44.20    2.80
   8   1  -2   46.50    4.60
   8   1  -2   53.89    6.80
   8   1  -2   45.70    6.10
  -8  -1   2   47.60    4.90
   7   1  -2  275.27    8.90
   7   1  -2  277.47    7.10
   7   1  -2  291.97   11.20
   7   1  -2  284.77    7.10
   7   1  -2  265.77   10.70
  -7  -1   2  290.17    9.60
  -7  -1   2  273.67    7.60
   6   1  -2  210.48    8.80
   6   1  -2  206.28    5.50
   6   1  -2  212.38    7.20
   6   1  -2  210.28    6.00
   6   1  -2  209.38    9.00
  -6  -1   2  210.38    6.00
  -6  -1   2  218.68    7.40
   5   1  -2  318.87    8.80
   5   1  -2  319.67   10.00
   5   1  -2  315.37   10.50
   5   1  -2  315.37    7.80
   5   1  -2  323.67    7.40
  -5  -1   2  310.57    6.80
  -5  -1   2  316.57    7.80
  -5  -1   2  313.27    6.80
  -5  -1   2  322.87    9.00
   4   1  -2  415.86   10.30
   4   1  -2  423.76   11.40
   4   1  -2  425.16    9.30
   4   1  -2  418.46   12.10
   4   1  -2  418.06    9.30
  -4  -1   2  412.76    9.70
  -4  -1   2  421.66   12.10
  -4  -1   2  426.26    9.10
  -4  -1   2  426.06   10.50
  -4  -1   2  433.66   11.40
   3   1  -2  633.24   13.30
   3   1  -2  634.14   15.80
   3   1  -2  615.44   13.30
   3   1  -2  624.94   14.10
   3   1  -2  618.54   14.80
  -3  -1   2  621.74   13.20
  -3  -1   2  633.44   14.80
  -3  -1   2  610.24   13.60
  -3  -1   2  632.24   14.10
  -3  -1   2  633.44   15.80
  -3  -1   2  625.04   13.20
   2   1  -2 2079.29   48.60
  -2  -1   2 2090.89   48.50
   1   1  -2  424.76    9.00
   1   1  -2  443.96    9.30
   1   1  -2  439.86    9.40
   1   1  -2  436.66   10.50
  -1  -1   2  447.06    9.30
  -1  -1   2  407.66    9.40
  -1  -1   2  432.86   10.40
  -1  -1   2  429.76    9.40
   0   1  -2   -1.40    0.20
   0   1  -2    0.20    0.40
   0  -1   2   -0.70    0.40
   0  -1   2   -1.60    0.40
   0  -1   2   -0.90    0.40
  -1   1  -2   35.50    1.40
  -1   1  -2   35.60    1.60
  -1   1  -2   35.50    1.50
   1  -1   2   34.80    1.50
   1  -1   2   33.60    1.60
   1  -1   2   34.50    1.40
   1  -1   2   34.90    1.50
   1  -1   2   34.50    1.30
  -2   1  -2  494.25   11.30
  -2   1  -2  531.35   11.90
  -2   1  -2  500.45   11.00
   2  -1   2  494.45   11.30
   2  -1   2  497.95   10.60
   2  -1   2  512.15   12.30
   2  -1   2  495.15   11.10
   2  -1   2  491.35   11.10
  -3   1  -2   36.70    2.10
  -3   1  -2   39.70    2.10
  -3   1  -2   34.60    3.10
   3  -1   2   37.90    3.90
   3  -1   2   33.70    1.80
   3  -1   2   36.60    2.10
   3  -1   2   35.10    2.10
   3  -1   2   34.30    2.00
   3  -1   2   36.50    2.70
  -4   1  -2   36.70    2.00
  -4   1  -2   39.40    2.10
  -4   1  -2   39.80    3.30
   4  -1   2   38.80    2.30
   4  -1   2   37.10    2.40
   4  -1   2   40.50    2.30
   4  -1   2   38.40    2.90
   4  -1   2   34.40    4.00
   4  -1   2   38.60    2.30
  -5   1  -2   15.60    2.50
  -5   1  -2   14.40    1.50
  -5   1  -2   17.90    1.80
   5  -1   2   14.40    2.10
   5  -1   2   16.40    1.90
   5  -1   2   16.90    2.30
   5  -1   2   15.90    3.80
   5  -1   2   16.00    1.90
   5  -1   2   15.10    2.10
  -6   1  -2   54.89    4.70
  -6   1  -2   52.79    2.50
  -6   1  -2   58.49    2.50
   6  -1   2   52.89    3.10
   6  -1   2   55.99    3.90
   6  -1   2   57.29    3.30
   6  -1   2   61.49    3.70
   6  -1   2   52.49    3.50
   6  -1   2   62.29    5.30
  -7   1  -2   28.70    1.90
  -7   1  -2   29.30    4.40
  -7   1  -2   30.40    2.00
   7  -1   2   32.70    2.90
   7  -1   2   32.10    3.70
   7  -1   2   37.90    5.90
   7  -1   2   29.40    5.30
   7  -1   2   33.10    3.10
  -8   1  -2   28.10    4.60
  -8   1  -2   33.90    1.40
  -8   1  -2   34.40    1.40
   8  -1   2   27.60    2.90
   8  -1   2   33.50    3.90
   8  -1   2   43.10    5.90
   8  -1   2   34.30    3.10
   8  -1   2   43.30    6.30
  -9   1  -2    6.70    3.70
   9  -1   2   10.10    2.20
   9  -1   2    9.90    3.40
   9  -1   2   13.50    3.20
   9  -1   2   12.70    2.30
   9  -1   2   13.80    3.00
   9  -1   2   10.00    4.10
 -10   1  -2   -0.50    3.50
  10  -1   2   -1.80    3.00
  10  -1   2    0.30    2.00
  10  -1   2   -0.30    4.60
  10  -1   2   -4.90    1.70
  10  -1   2    1.30    2.30
  10  -1   2    0.20    2.70
 -11   1  -2    5.00    4.30
  11  -1   2    9.00    2.60
  11  -1   2    3.90    2.50
  11  -1   2    5.50    2.70
  11  -1   2    4.80    3.40
  11  -1   2    8.40    2.20
  11  -1   2    3.10    3.50
  11  -1   2    6.20    5.40
  11  -1   2    3.80    2.10
 -12   1  -2    2.80    4.20
  12  -1   2    3.80    3.00
  12  -1   2    6.70    3.20
  12  -1   2    6.00    2.80
  12  -1   2    8.90    5.30
  12  -1   2    5.40    2.20
  12  -1   2    9.00    2.40
  12  -1   2    5.80    3.70
  12   0  -2    4.30    1.50
  12   0  -2    1.60    4.90
  12   0  -2   -1.30    4.30
  12   0  -2   -1.00    3.00
  12   0  -2    1.60    2.20
  12   0  -2   -2.10    5.00
  12   0  -2    4.70    3.90
 -12   0   2   -2.70    3.50
  11   0  -2   12.80    1.80
  11   0  -2   20.80    4.80
  11   0  -2    9.30    3.20
  11   0  -2    8.50    3.20
  11   0  -2   12.70    1.70
  11   0  -2   12.00    5.20
  11   0  -2   11.20    4.70
 -11   0   2   10.90    3.90
  10   0  -2    2.40    4.20
  10   0  -2    4.00    3.10
  10   0  -2    2.60    4.30
  10   0  -2    2.00    1.40
  10   0  -2    2.30    2.90
 -10   0   2    0.00    3.30
   9   0  -2   39.00    4.20
   9   0  -2   36.70    5.70
   9   0  -2   37.60    5.80
  -9   0   2   36.70    4.60
   8   0  -2  173.28    9.10
   8   0  -2  165.18    6.90
   8   0  -2  178.78    4.90
   8   0  -2  171.68    4.90
   8   0  -2  161.88    8.70
  -8   0   2  164.68    6.00
  -8   0   2  181.38    7.80
   7   0  -2  203.18    5.30
   7   0  -2  212.38    7.30
   7   0  -2  208.58    9.30
   7   0  -2  194.68    8.90
   7   0  -2  204.68    5.30
  -7   0   2  207.38    6.60
  -7   0   2  209.48    7.90
   6   0  -2  257.67    7.90
   6   0  -2  267.97    9.70
   6   0  -2  262.07    6.20
   6   0  -2  261.37    9.70
   6   0  -2  256.27    6.10
  -6   0   2  263.27    7.30
  -6   0   2  263.97    8.50
   5   0  -2  380.16    8.40
   5   0  -2  378.76    8.40
   5   0  -2  388.26   11.30
   5   0  -2  384.36   11.80
  -5   0   2  390.66   10.30
  -5   0   2  401.56    9.50
   4   0  -2  199.78    6.70
   4   0  -2  194.78    7.50
   4   0  -2  192.58    4.60
   4   0  -2  195.88    4.40
  -4   0   2  191.48    5.40
  -4   0   2  209.68    6.00
   3   0  -2  369.66    9.50
   3   0  -2  370.66    7.70
   3   0  -2  360.96    8.60
   3   0  -2  370.16   10.30
   3   0  -2  370.76    7.70
  -3   0   2  360.06    8.50
  -3   0   2  367.66    8.80
   2   0  -2   40.80    1.00
   2   0  -2   36.80    1.50
   2   0  -2   39.30    1.10
  -2   0   2   41.20    1.60
  -2   0   2   38.20    1.60
   0   0   2   -0.40    0.20
  -1   0  -2  295.77    7.00
  -1   0  -2  276.07    6.60
  -1   0  -2  297.27    6.60
   1   0   2  291.37    7.20
   1   0   2  294.07    6.60
   1   0   2  291.77    6.20
   1   0   2  281.27    6.50
   1   0   2  292.97    6.60
   1   0   2  283.37    6.50
  -2   0  -2   29.40    1.50
  -2   0  -2   27.10    1.80
  -2   0  -2   30.30    1.90
  -2   0  -2   24.70    3.00
  -2   0  -2   24.50    2.10
   2   0   2   30.80    1.80
   2   0   2   27.20    3.10
   2   0   2   26.60    1.60
   2   0   2   28.90    1.40
   2   0   2   28.50    1.80
   2   0   2   29.40    2.10
  -3   0  -2    1.10    1.20
  -3   0  -2   -4.10    2.20
  -3   0  -2    0.00    1.20
   3   0   2    1.40    1.30
   3   0   2   -2.20    3.00
   3   0   2   -1.10    2.20
   3   0   2   -1.30    1.40
   3   0   2    1.90    1.30
  -4   0  -2  260.37    6.50
  -4   0  -2  249.88    8.70
  -4   0  -2  260.87    6.30
  -4   0  -2  260.87    8.10
   4   0   2  263.07    6.50
   4   0   2  255.97    6.50
   4   0   2  248.98    6.90
   4   0   2  254.07    7.10
   4   0   2  248.88    8.90
  -5   0  -2   64.09    2.70
  -5   0  -2   63.49    4.60
  -5   0  -2   62.79    2.90
  -5   0  -2   60.99    5.10
   5   0   2   68.69    5.50
   5   0   2   63.89    3.10
   5   0   2   63.29    3.10
   5   0   2   63.69    3.60
   5   0   2   66.29    3.90
  -6   0  -2   -1.90    2.90
  -6   0  -2    5.60    1.60
  -6   0  -2    4.70    1.40
   6   0   2    2.60    1.50
   6   0   2    1.30    1.80
   6   0   2    2.90    3.10
   6   0   2    5.20    2.40
   6   0   2    3.70    2.50
  -7   0  -2    2.40    1.30
  -7   0  -2    2.00    1.40
  -7   0  -2    2.20    2.70
   7   0   2    0.70    1.90
   7   0   2    6.90    2.80
   7   0   2    0.20    3.90
   7   0   2    2.10    2.20
  -8   0  -2   -1.50    0.90
  -8   0  -2   -2.50    3.30
  -8   0  -2    0.70    1.10
   8   0   2    1.70    2.80
   8   0   2    3.20    2.20
   8   0   2    2.10    4.30
   8   0   2   -2.20    2.60
  -9   0  -2   -6.90    2.70
   9   0   2   -0.80    1.70
   9   0   2   -0.90    4.00
   9   0   2    0.20    2.70
   9   0   2    5.40    3.00
   9   0   2    0.30    2.50
   9   0   2   -1.30    1.90
   9   0   2    1.80    2.00
 -10   0  -2   -3.30    3.40
  10   0   2    1.00    3.00
  10   0   2   -3.50    1.70
  10   0   2   -1.10    2.70
  10   0   2    0.90    4.10
  10   0   2    1.10    2.60
  10   0   2    1.30    2.00
  10   0   2   -0.90    2.10
  10   0   2    1.00    2.50
 -11   0  -2    1.90    3.90
  11   0   2   10.10    2.90
  11   0   2    4.10    2.30
  11   0   2    4.80    2.70
  11   0   2    2.30    3.40
  11   0   2    3.60    2.40
  11   0   2    9.00    5.10
  12  -1  -2    2.00    3.20
  12  -1  -2    1.80    1.10
  12  -1  -2    4.20    3.10
  12  -1  -2    1.60    4.40
  12  -1  -2    7.90    4.10
  12  -1  -2    6.50    5.20
  12  -1  -2    3.70    1.20
 -12   1   2    2.50    3.70
  11  -1  -2    3.40    3.30
  11  -1  -2    3.60    1.30
  11  -1  -2    1.70    3.70
  11  -1  -2    2.10    4.50
  11  -1  -2    1.10    2.60
  11  -1  -2    1.30    1.20
  11  -1  -2    2.00    4.50
 -11   1   2    0.20    3.20
  10  -1  -2   25.20    3.80
  10  -1  -2   16.10    1.60
  10  -1  -2   20.50    5.10
  10  -1  -2   19.60    4.60
  10  -1  -2   15.70    4.90
  10  -1  -2   15.40    1.70
  10  -1  -2   22.70    3.80
 -10   1   2   17.30    4.40
   9  -1  -2    5.30    5.00
   9  -1  -2   10.30    1.40
   9  -1  -2    9.00    4.00
   9  -1  -2    3.30    4.20
   9  -1  -2    8.50    1.40
   9  -1  -2   19.70    3.50
   9  -1  -2    5.60    3.80
  -9   1   2    7.30    3.40
   8  -1  -2   78.69    5.10
   8  -1  -2   74.89    6.70
   8  -1  -2   77.99    2.80
   8  -1  -2   81.59    2.80
   8  -1  -2   82.09    7.10
  -8   1   2   73.09    5.60
  -8   1   2   81.59    4.60
   7  -1  -2  135.39    3.60
   7  -1  -2  134.49    7.60
   7  -1  -2  125.29    7.50
   7  -1  -2  144.79    5.90
  -7   1   2  132.79    5.30
  -7   1   2  136.49    6.40
   6  -1  -2  190.28    8.00
   6  -1  -2  189.48    6.20
   6  -1  -2  174.58    8.00
   6  -1  -2  177.48    4.30
  -6   1   2  188.78    6.80
  -6   1   2  182.48    6.00
   5  -1  -2  250.57    5.60
   5  -1  -2  255.07    8.50
  -5   1   2  265.97    7.70
  -5   1   2  254.07    7.00
  -4   1   2  147.39    5.00
  -4   1   2  148.29    4.60
  -3   1   2  614.14   13.90
  -3   1   2  629.34   14.10
   2  -1  -2    2.40    0.50
   2  -1  -2    2.50    1.00
   2  -1  -2    1.80    0.40
   2  -1  -2    2.30    1.50
  -2   1   2    5.30    1.00
  -2   1   2    2.30    1.00
  -2   1   2    1.70    0.40
  -2   1   2    3.60    0.80
  -1   1   2  613.24   13.10
   0  -1  -2  377.26    8.30
   0  -1  -2  369.76    8.70
   0  -1  -2  372.86    8.30
   0  -1  -2  387.26    8.90
   0  -1  -2  374.66    8.60
   0   1   2  380.36    8.80
   0   1   2  377.46    8.30
   0   1   2  376.76    8.70
   0   1   2  376.96    8.30
   0   1   2  367.16    8.30
  -1  -1  -2   20.30    1.60
  -1  -1  -2   19.90    1.50
  -1  -1  -2   22.50    1.70
  -1  -1  -2   24.40    1.80
  -1  -1  -2   23.80    2.40
   1   1   2   21.00    1.60
   1   1   2   21.60    1.00
   1   1   2   23.70    1.60
   1   1   2   20.30    1.60
   1   1   2   21.40    1.90
  -2  -1  -2   37.00    3.30
  -2  -1  -2   40.10    2.60
  -2  -1  -2   39.30    2.70
   2   1   2   33.80    3.60
   2   1   2   42.30    4.60
   2   1   2   36.20    2.30
   2   1   2   37.00    2.20
   2   1   2   38.10    1.70
  -3  -1  -2  509.35   11.70
  -3  -1  -2  533.65   11.70
  -3  -1  -2  510.75   13.50
  -3  -1  -2  501.05   12.40
  -3  -1  -2  514.55   13.00
   3   1   2  520.55   11.70
   3   1   2  513.25   11.60
   3   1   2  519.15   13.70
   3   1   2  504.25   12.10
   3   1   2  502.65   11.00
  -4  -1  -2   16.20    2.70
  -4  -1  -2   10.30    2.80
  -4  -1  -2   13.00    1.60
  -4  -1  -2   13.70    1.80
  -4  -1  -2   11.20    2.60
   4   1   2   12.30    1.40
   4   1   2    9.70    1.60
   4   1   2    9.30    1.60
   4   1   2   15.30    2.30
   4   1   2   14.00    3.30
  -5  -1  -2  126.59    7.10
  -5  -1  -2  131.49    6.30
  -5  -1  -2  128.29    4.20
  -5  -1  -2  134.79    4.50
  -5  -1  -2  130.59    5.90
   5   1   2  138.29    5.90
   5   1   2  123.19    4.40
   5   1   2  125.79    4.40
   5   1   2  133.29    7.40
  -6  -1  -2   60.09    6.30
  -6  -1  -2   61.79    3.10
  -6  -1  -2   59.79    5.20
  -6  -1  -2   67.69    3.50
   6   1   2   62.79    4.30
   6   1   2   55.29    6.40
   6   1   2   60.99    3.50
   6   1   2   65.59    3.40
  -7  -1  -2   -3.10    3.90
  -7  -1  -2    0.00    1.40
  -7  -1  -2   -1.10    3.00
  -7  -1  -2    2.10    1.70
   7   1   2    0.60    2.40
   7   1   2   -1.10    1.90
   7   1   2    4.40    2.90
   7   1   2   -2.10    1.40
   7   1   2   -4.80    2.00
   7   1   2   -0.60    4.20
  -8  -1  -2   -3.50    1.30
  -8  -1  -2   -3.90    3.10
  -8  -1  -2    1.50    1.30
   8   1   2   -5.40    3.50
   8   1   2   -0.20    2.80
   8   1   2   -0.40    2.30
   8   1   2   -1.60    2.10
   8   1   2   -0.70    1.80
   8   1   2   -0.40    1.60
   8   1   2    0.50    2.10
  -9  -1  -2   -1.90    0.90
   9   1   2   -2.10    4.40
   9   1   2   -3.60    1.60
   9   1   2   -1.20    2.60
   9   1   2   -1.60    1.90
   9   1   2    1.40    2.90
   9   1   2   -0.40    2.60
 -10  -1  -2    0.30    3.80
  10   1   2    1.40    3.20
  10   1   2   -2.60    1.70
  10   1   2    1.70    4.80
  10   1   2    5.40    2.80
  10   1   2    1.50    2.00
  10   1   2   -0.60    3.00
 -11  -1  -2    2.20    4.00
  11   1   2    4.50    2.70
  11   1   2    5.90    2.70
  11   1   2    1.20    3.40
  11   1   2   -0.60    3.00
  11   1   2    2.00    2.40
  11   1   2    0.70    2.50
  11   1   2    5.80    5.60
  13  -2  -2    3.30    3.20
  12  -2  -2    2.00    0.80
  12  -2  -2    3.40    4.30
  12  -2  -2   -2.50    4.50
  12  -2  -2   -1.20    2.80
  12  -2  -2    0.00    0.80
  12  -2  -2    1.50    3.40
  12  -2  -2    5.30    3.70
 -12   2   2    3.40    3.80
  11  -2  -2    6.60    3.70
  11  -2  -2    4.70    4.20
  11  -2  -2    2.50    1.80
  11  -2  -2    5.70    4.50
  11  -2  -2    0.50    3.10
  11  -2  -2    1.80    2.80
  11  -2  -2    2.80    1.00
 -11   2   2    3.40    3.60
  10  -2  -2   17.90    1.60
  10  -2  -2   20.60    5.40
  10  -2  -2   23.60    3.80
  10  -2  -2   23.50    5.00
  10  -2  -2   20.50    1.70
  10  -2  -2   13.00    4.70
 -10   2   2   20.20    4.30
   9  -2  -2    5.70    1.20
   9  -2  -2    6.00    4.50
   9  -2  -2    1.50    2.70
   9  -2  -2    6.70    3.90
   9  -2  -2    3.30    3.90
   9  -2  -2    3.70    1.20
  -9   2   2    3.80    3.30
   8  -2  -2   11.20    1.30
   8  -2  -2   12.90    4.30
   8  -2  -2   12.60    1.30
   8  -2  -2    9.80    4.70
   8  -2  -2   10.80    4.40
   8  -2  -2    8.70    2.90
  -8   2   2   10.90    3.00
  -8   2   2   11.70    3.20
   7  -2  -2   28.70    1.60
   7  -2  -2   32.80    4.80
   7  -2  -2   26.70    3.10
   7  -2  -2   24.30    4.50
   7  -2  -2   28.70    1.70
  -7   2   2   32.30    3.70
  -7   2   2   38.50    3.60
   6  -2  -2    5.30    0.90
   6  -2  -2    3.50    3.10
   6  -2  -2    8.80    2.20
   6  -2  -2    5.30    0.90
  -6   2   2    7.30    2.30
  -6   2   2    7.10    2.50
   5  -2  -2  228.38    5.20
   5  -2  -2  223.18    5.20
   5  -2  -2  240.68    6.60
  -5   2   2  230.58    7.30
  -5   2   2  239.08    6.90
   4  -2  -2  224.68    7.20
   4  -2  -2  217.78    4.90
   4  -2  -2  206.98    7.40
   4  -2  -2  216.08    7.00
  -4   2   2  217.78    6.20
  -4   2   2  221.38    6.70
   3  -2  -2   37.90    2.10
   3  -2  -2   38.40    1.60
   3  -2  -2   35.20    3.50
   3  -2  -2   34.00    3.00
  -3   2   2   34.10    3.50
  -3   2   2   37.50    1.40
  -3   2   2   37.10    1.60
  -3   2   2   31.50    2.70
  -3   2   2   34.00    2.50
   2  -2  -2 2766.62   63.99
  -2   2   2 2779.12   64.09
   1  -2  -2 2413.76   58.49
  -1   2   2 2418.56   58.49
   0  -2  -2  529.15   12.50
   0  -2  -2  517.55   11.40
   0  -2  -2  507.05   11.10
   0  -2  -2  516.65   11.40
   0  -2  -2  498.55   12.00
   0  -2  -2  533.65   11.90
   0   2   2  502.85   11.10
   0   2   2  516.95   11.40
   0   2   2  515.25   11.10
   0   2   2  525.45   12.40
   0   2   2  497.95   12.10
   0   2   2  517.75   11.40
  -1  -2  -2  674.53   14.80
  -1  -2  -2  684.93   15.60
  -1  -2  -2  688.23   15.80
  -1  -2  -2  646.44   15.80
   1   2   2  665.33   14.80
   1   2   2  679.23   15.80
   1   2   2  663.03   14.00
   1   2   2  677.63   14.80
   1   2   2  676.13   14.70
  -2  -2  -2  246.78    7.70
  -2  -2  -2  262.47    7.70
  -2  -2  -2  251.67    8.30
  -2  -2  -2  254.97    6.60
   2   2   2  254.47    6.60
   2   2   2  264.57    7.50
   2   2   2  253.87    6.70
   2   2   2  259.97    9.20
   2   2   2  260.87    6.60
  -3  -2  -2    1.30    1.30
  -3  -2  -2   -1.10    2.50
  -3  -2  -2    2.00    2.20
  -3  -2  -2   -0.50    2.00
  -3  -2  -2    1.90    1.40
   3   2   2    3.00    2.00
   3   2   2    1.40    1.40
   3   2   2    0.90    1.40
   3   2   2    4.20    2.70
   3   2   2    1.70    1.50
  -4  -2  -2  304.67   10.40
  -4  -2  -2  294.27    9.30
  -4  -2  -2  311.57    9.60
  -4  -2  -2  300.07    7.80
  -4  -2  -2  307.37    7.70
   4   2   2  314.37   10.30
   4   2   2  299.17    8.90
   4   2   2  259.77    6.50
   4   2   2  305.17    7.80
   4   2   2  304.27    7.80
   4   2   2  293.77    8.40
  -5  -2  -2  122.39    7.30
  -5  -2  -2  119.79    6.20
  -5  -2  -2  124.79    4.70
  -5  -2  -2  124.79    4.40
   5   2   2  106.99    3.20
   5   2   2  128.99    4.70
   5   2   2  120.99    5.40
   5   2   2  123.49    7.40
   5   2   2  117.59    5.70
   5   2   2  119.99    4.70
  -6  -2  -2   69.89    3.40
  -6  -2  -2   70.79    5.40
  -6  -2  -2   66.69    6.60
  -6  -2  -2   56.69    5.50
  -6  -2  -2   64.79    3.70
   6   2   2   65.99    3.90
   6   2   2   67.99    4.00
   6   2   2   71.19    6.90
   6   2   2   67.29    4.10
   6   2   2   64.09    4.80
   6   2   2   54.59    2.40
  -7  -2  -2   23.80    4.20
  -7  -2  -2   31.60    5.50
  -7  -2  -2   25.80    4.30
  -7  -2  -2   26.40    2.80
   7   2   2   30.10    3.00
   7   2   2   25.00    2.00
   7   2   2   26.60    3.80
   7   2   2   29.20    3.10
   7   2   2   24.90    3.90
   7   2   2   34.90    5.90
  -8  -2  -2   -1.40    1.50
  -8  -2  -2   -0.70    3.30
  -8  -2  -2    0.80    1.80
  -8  -2  -2    2.60    4.10
   8   2   2   -2.10    1.20
   8   2   2   -3.50    2.70
   8   2   2   -2.40    2.10
   8   2   2    0.30    3.80
   8   2   2   -1.90    2.80
   8   2   2    1.60    2.60
   8   2   2    3.60    3.10
  -9  -2  -2   -0.90    1.20
  -9  -2  -2   -1.90    1.40
  -9  -2  -2   -1.00    3.60
   9   2   2    0.50    2.10
   9   2   2   -2.60    2.00
   9   2   2   -5.50    4.30
   9   2   2    2.60    3.30
   9   2   2    2.30    2.90
   9   2   2   -0.90    2.80
 -10  -2  -2   -6.10    3.30
  10   2   2    0.50    3.00
  10   2   2   -2.20    3.00
  10   2   2   -0.70    2.10
  10   2   2    3.30    2.90
  10   2   2    2.80    5.00
 -11  -2  -2   -2.90    3.70
  11   2   2   -0.10    2.10
  11   2   2   -4.90    3.10
  11   2   2    6.80    2.90
  11   2   2   -7.60    3.00
  13  -3  -2    2.40    3.30
  13  -3  -2    8.10    6.10
  13  -3  -2    3.40    4.50
  13  -3  -2   12.70    3.60
  13  -3  -2    2.20    4.00
  13  -3  -2    3.80    3.40
 -13   3   2   -2.20    3.80
  12  -3  -2   -0.20    3.20
  12  -3  -2    9.10    3.90
  12  -3  -2    1.60    4.30
  12  -3  -2    2.60    3.00
  12  -3  -2   -3.00    3.50
  12  -3  -2    0.30    0.60
  12  -3  -2   10.20    5.10
  12  -3  -2    0.90    0.70
 -12   3   2    3.10    4.10
  11  -3  -2   12.90    4.10
  11  -3  -2   13.50    4.90
  11  -3  -2    7.40    1.30
  11  -3  -2    7.50    3.30
  11  -3  -2    8.20    1.10
  11  -3  -2   20.40    5.30
  11  -3  -2    8.70    4.50
 -11   3   2    6.10    3.40
  10  -3  -2    6.50    1.20
  10  -3  -2   10.10    3.90
  10  -3  -2   11.50    4.10
  10  -3  -2    9.10    4.60
  10  -3  -2    8.90    1.30
  10  -3  -2   10.50    4.40
  10  -3  -2   14.10    3.20
 -10   3   2    5.40    3.70
   9  -3  -2    9.90    4.80
   9  -3  -2    5.40    1.20
   9  -3  -2   11.70    4.50
   9  -3  -2    7.50    3.00
   9  -3  -2    4.50    3.90
   9  -3  -2    5.30    1.30
  -9   3   2    3.60    3.40
   8  -3  -2    0.40    1.10
   8  -3  -2    0.10    3.50
   8  -3  -2   -2.80    3.80
   8  -3  -2    2.00    2.70
   8  -3  -2    0.90    1.30
   8  -3  -2   -1.10    3.40
  -8   3   2   -1.80    3.10
  -8   3   2    4.80    2.90
   7  -3  -2    7.20    1.20
   7  -3  -2   12.70    2.70
   7  -3  -2    8.90    3.80
   7  -3  -2    8.50    1.30
   7  -3  -2    6.80    3.70
  -7   3   2    7.80    2.90
   6  -3  -2    8.90    2.20
   6  -3  -2    9.80    2.70
   6  -3  -2   10.20    1.20
   6  -3  -2   11.80    3.60
   6  -3  -2   10.10    1.40
  -6   3   2    9.80    2.60
  -6   3   2   10.70    2.70
   5  -3  -2    6.50    1.10
   5  -3  -2    5.40    2.90
   5  -3  -2    7.20    1.80
   5  -3  -2    6.80    2.30
   5  -3  -2    4.90    1.10
  -5   3   2    7.60    2.30
  -5   3   2    6.40    2.30
   4  -3  -2   62.99    2.80
   4  -3  -2   59.19    4.00
   4  -3  -2   57.89    2.20
   4  -3  -2   59.79    2.30
   4  -3  -2   59.89    4.50
  -4   3   2   61.09    2.70
  -4   3   2   57.49    2.00
  -4   3   2   63.19    4.40
  -4   3   2   60.79    3.60
  -4   3   2   64.09    3.30
  -4   3   2   57.49    2.00
   3  -3  -2  986.20   21.60
   3  -3  -2 1036.30   21.80
   3  -3  -2 1033.00   23.20
   3  -3  -2 1010.80   24.10
  -3   3   2 1022.90   21.60
  -3   3   2 1075.09   23.90
  -3   3   2 1018.50   22.50
  -3   3   2 1024.00   24.20
  -3   3   2 1024.70   23.20
  -3   3   2  998.60   21.70
   2  -3  -2  358.76    8.40
   2  -3  -2  357.36    8.00
   2  -3  -2  385.66   13.00
   2  -3  -2  349.87    8.40
  -2   3   2  357.26    8.00
  -2   3   2  357.36    8.80
  -2   3   2  348.17    8.80
  -1   3   2  896.11   19.80
  -1   3   2  947.91   21.70
  -1   3   2  917.51   19.80
   0  -3  -2  393.16    9.60
   0  -3  -2  383.46   11.00
   0  -3  -2  379.96    9.10
   0  -3  -2  375.06   10.50
   0  -3  -2  373.46    8.60
   0  -3  -2  373.96    9.00
   0   3   2  379.06    8.50
   0   3   2  370.56   10.00
   0   3   2  372.36    8.60
   0   3   2  369.26    8.90
   0   3   2  384.16   10.50
   0   3   2  367.16    8.90
  -1  -3  -2  148.49    5.90
  -1  -3  -2  140.39    5.60
  -1  -3  -2  143.09    4.40
  -1  -3  -2  143.19    5.30
   1   3   2  148.09    4.60
   1   3   2  140.69    5.20
   1   3   2  152.58    6.70
   1   3   2  143.09    3.50
   1   3   2  139.19    4.60
  -2  -3  -2  351.36    8.80
  -2  -3  -2  370.76   10.00
  -2  -3  -2  347.37   10.20
  -2  -3  -2  349.47   10.50
  -2  -3  -2  315.27    8.60
   2   3   2  359.56    8.90
   2   3   2  351.36    8.80
   2   3   2  349.96    8.80
   2   3   2  350.96   10.10
   2   3   2  353.56   10.10
  -3  -3  -2   -2.90    2.00
  -3  -3  -2   -0.10    3.20
  -3  -3  -2   -0.40    1.80
  -3  -3  -2    1.80    1.50
  -3  -3  -2   -0.10    2.80
   3   3   2    1.90    1.60
   3   3   2   -0.30    1.70
   3   3   2    0.00    2.40
   3   3   2    3.10    2.20
   3   3   2   -2.10    1.50
  -4  -3  -2  405.26   12.30
  -4  -3  -2  413.16   13.30
  -4  -3  -2  405.26   10.40
  -4  -3  -2  422.16   12.70
  -4  -3  -2  419.26   10.40
   4   3   2  410.56   10.50
   4   3   2  417.96   10.50
   4   3   2  415.16   12.10
   4   3   2  421.76   13.00
   4   3   2  423.76   11.10
  -5  -3  -2  114.89    6.60
  -5  -3  -2  114.69    6.80
  -5  -3  -2  108.59    7.60
  -5  -3  -2  122.19    4.70
  -5  -3  -2  115.29    4.40
   5   3   2  114.09    4.70
   5   3   2  110.49    7.40
   5   3   2  113.29    4.70
   5   3   2  109.59    6.10
   5   3   2  109.39    5.40
  -6  -3  -2   81.39    6.10
  -6  -3  -2   79.19    4.20
  -6  -3  -2   77.09    6.10
  -6  -3  -2   72.89    7.10
   6   3   2   79.29    7.10
   6   3   2   74.59    5.60
   6   3   2   76.69    4.20
   6   3   2   78.09    5.00
   6   3   2   72.39    4.10
  -7  -3  -2   18.80    2.40
  -7  -3  -2   21.40    4.40
  -7  -3  -2   23.50    4.60
  -7  -3  -2   21.40    8.30
  -7  -3  -2   20.30    2.70
   7   3   2   16.20    3.10
   7   3   2   16.30    2.90
   7   3   2   17.40    3.60
   7   3   2   21.90    4.20
   7   3   2   20.80    5.20
  -8  -3  -2    2.00    3.40
  -8  -3  -2    0.00    1.70
  -8  -3  -2    0.70    1.90
  -8  -3  -2    0.40    3.50
   8   3   2    2.10    4.10
   8   3   2   -2.90    2.10
   8   3   2   -0.60    2.00
   8   3   2    2.10    3.40
   8   3   2   -1.90    2.50
  -9  -3  -2    9.80    4.10
  -9  -3  -2    6.30    1.70
  -9  -3  -2    7.70    2.00
   9   3   2   10.80    2.80
   9   3   2    4.60    3.20
   9   3   2   11.10    3.60
   9   3   2   13.00    3.60
   9   3   2    5.20    5.10
   9   3   2   11.00    2.70
 -10  -3  -2    0.60    0.90
 -10  -3  -2   -1.80    3.90
 -10  -3  -2    1.00    1.20
  10   3   2   -7.40    4.50
  10   3   2   -0.80    2.40
  10   3   2    8.20    3.40
  10   3   2   -0.40    3.20
  13  -4  -2    4.80    4.60
  13  -4  -2   16.00    7.20
  13  -4  -2    6.30    4.90
  13  -4  -2    8.30    3.60
  13  -4  -2   13.60    3.60
  13  -4  -2    4.70    3.70
 -13   4   2    1.70    4.30
  12  -4  -2    3.00    4.40
  12  -4  -2    5.60    0.80
  12  -4  -2   13.50    5.00
  12  -4  -2    6.10    0.90
  12  -4  -2   17.10    4.40
  12  -4  -2    3.60    3.40
  12  -4  -2    1.10    4.40
 -12   4   2    8.20    3.80
  11  -4  -2    3.30    4.00
  11  -4  -2    2.60    1.10
  11  -4  -2   -0.80    2.80
  11  -4  -2    2.40    4.60
  11  -4  -2    2.40    1.10
  11  -4  -2    0.70    3.50
  11  -4  -2    3.00    4.30
 -11   4   2    4.10    3.80
  10  -4  -2   12.40    1.50
  10  -4  -2   10.40    4.30
  10  -4  -2   10.90    1.50
  10  -4  -2   15.90    5.00
  10  -4  -2   14.30    3.30
  10  -4  -2   10.50    4.90
  10  -4  -2   13.70    4.60
 -10   4   2    7.00    4.00
   9  -4  -2   36.70    2.40
   9  -4  -2   40.80    4.00
   9  -4  -2   41.80    5.80
   9  -4  -2   30.90    5.60
   9  -4  -2   38.00    2.20
   9  -4  -2   32.00    4.90
  -9   4   2   34.00    4.70
   8  -4  -2   44.70    2.40
   8  -4  -2   47.00    4.20
   8  -4  -2   43.40    5.60
   8  -4  -2   47.80    2.60
   8  -4  -2   43.40    5.20
  -8   4   2   49.80    5.10
  -8   4   2   43.30    4.70
   7  -4  -2   34.80    2.30
   7  -4  -2   32.50    4.50
   7  -4  -2   39.30    3.40
   7  -4  -2   33.40    2.20
   7  -4  -2   38.20    5.20
  -7   4   2   36.20    4.00
  -7   4   2   31.70    4.10
   6  -4  -2   -0.50    1.20
   6  -4  -2    0.10    1.20
   6  -4  -2   -1.20    2.90
   6  -4  -2   -3.60    2.90
   6  -4  -2    1.00    1.90
  -6   4   2   -0.30    0.50
  -6   4   2   -0.80    2.30
  -6   4   2    1.00    2.00
   5  -4  -2    3.10    1.20
   5  -4  -2    2.90    1.30
   5  -4  -2   -0.10    2.90
   5  -4  -2    2.40    1.70
   5  -4  -2   -1.50    2.40
  -5   4   2    2.00    2.10
  -5   4   2    2.90    1.00
  -5   4   2    1.70    2.20
  -5   4   2   -0.20    3.10
  -5   4   2    2.20    1.50
   4  -4  -2   22.10    2.00
   4  -4  -2   24.70    3.80
   4  -4  -2   23.20    2.10
   4  -4  -2   25.70    3.10
   4  -4  -2   24.80    3.00
  -4   4   2   26.60    4.10
  -4   4   2   23.10    2.80
  -4   4   2   23.30    3.10
  -4   4   2   26.40    1.90
  -4   4   2   22.70    1.80
   3  -4  -2   49.10    2.50
   3  -4  -2   47.30    3.30
   3  -4  -2   49.00    2.30
   3  -4  -2   46.00    3.70
   3  -4  -2   49.10    2.40
  -3   4   2   51.39    4.30
  -3   4   2   45.30    2.30
  -3   4   2   47.30    2.30
  -3   4   2   44.10    3.60
  -3   4   2   44.00    3.00
  -3   4   2   46.80    2.30
   2  -4  -2  507.75   11.80
   2  -4  -2  510.35   13.10
   2  -4  -2  504.65   11.70
   2  -4  -2  498.25   11.30
   2  -4  -2  527.75   15.50
  -2   4   2  515.65   11.30
  -2   4   2  534.65   13.40
  -2   4   2  511.55   11.80
  -2   4   2  523.05   14.00
  -2   4   2  470.15   11.60
  -2   4   2  513.85   12.10
   1  -4  -2  223.18    6.30
   1  -4  -2  227.98    7.10
   1  -4  -2  226.78    5.70
   1  -4  -2  229.58    6.10
  -1   4   2  232.98    6.30
  -1   4   2  235.58    6.20
  -1   4   2  221.18    5.70
  -1   4   2  229.78    7.80
  -1   4   2  243.98    8.30
  -1   4   2  225.98    6.30
   0  -4  -2  302.47    9.00
   0  -4  -2  304.87    8.10
   0  -4  -2  302.17   10.80
   0  -4  -2  312.17    8.00
   0  -4  -2  303.07    7.80
   0  -4  -2  314.97    8.70
   0   4   2  307.97    8.80
   0   4   2  308.57    9.40
   0   4   2  303.77    7.80
   0   4   2  309.27    8.00
   0   4   2  305.47    7.30
  -1  -4  -2    3.40    2.70
  -1  -4  -2    4.60    1.40
  -1  -4  -2    5.90    1.80
  -1  -4  -2    3.20    2.20
  -1  -4  -2    2.80    2.20
  -1  -4  -2    4.00    1.40
   1   4   2    6.70    2.50
   1   4   2    3.00    2.70
   1   4   2    5.40    1.50
   1   4   2    2.60    1.30
   1   4   2    5.10    1.40
  -2  -4  -2   39.90    3.80
  -2  -4  -2   36.60    4.40
  -2  -4  -2   41.60    3.00
  -2  -4  -2   40.80    3.00
  -2  -4  -2   39.30    4.20
  -2  -4  -2   39.30    1.10
   2   4   2   42.90    4.20
   2   4   2   37.20    3.90
   2   4   2   37.20    3.00
   2   4   2   39.30    3.00
   2   4   2   44.60    3.00
  -3  -4  -2  360.26   11.20
  -3  -4  -2  369.66    9.70
  -3  -4  -2  366.66   12.20
  -3  -4  -2  366.26   11.90
   3   4   2  376.06   10.00
   3   4   2  377.86    9.80
   3   4   2  374.46   11.70
   3   4   2  386.26   11.70
   3   4   2  362.96    9.60
  -4  -4  -2   99.89    4.70
  -4  -4  -2   93.99    6.40
  -4  -4  -2   93.79    6.10
  -4  -4  -2   97.09    7.10
  -4  -4  -2  102.59    4.50
   4   4   2   96.99    4.60
   4   4   2   99.69    4.60
   4   4   2   95.99    6.20
   4   4   2  107.69    6.70
   4   4   2   95.89    4.50
  -5  -4  -2   63.19    5.70
  -5  -4  -2   73.49    3.90
  -5  -4  -2   62.99    6.30
  -5  -4  -2   69.59    4.10
  -5  -4  -2   64.29    6.90
   5   4   2   73.29    4.20
   5   4   2   63.59    5.80
   5   4   2   76.79    6.70
   5   4   2   71.09    4.90
   5   4   2   69.89    4.20
  -6  -4  -2  150.48    8.50
  -6  -4  -2  149.99    6.10
  -6  -4  -2  157.98    8.20
  -6  -4  -2  165.38    8.20
  -6  -4  -2  150.28    9.30
   6   4   2  155.88    8.70
   6   4   2  157.98    6.90
   6   4   2  154.88    7.90
   6   4   2  154.28    6.00
   6   4   2  156.08    6.00
  -7  -4  -2   55.59    4.00
  -7  -4  -2   51.09    6.10
  -7  -4  -2   46.90    5.60
  -7  -4  -2   46.10    3.60
  -7  -4  -2   50.59    6.50
   7   4   2   47.90    4.00
   7   4   2   51.39    6.80
   7   4   2   49.80    3.90
   7   4   2   44.50    5.30
   7   4   2   51.49    4.80
  -8  -4  -2    6.50    2.40
  -8  -4  -2    0.90    4.30
  -8  -4  -2    7.80    2.20
  -8  -4  -2    7.40    4.60
  -8  -4  -2   12.20    4.40
   8   4   2    4.20    2.60
   8   4   2    6.10    3.60
   8   4   2    1.30    4.60
   8   4   2    9.00    2.90
   8   4   2   -0.90    2.60
  -9  -4  -2   18.40    5.20
  -9  -4  -2   15.20    4.60
  -9  -4  -2    8.00    2.20
  -9  -4  -2   16.20    2.30
   9   4   2    6.30    4.90
   9   4   2   11.90    2.90
   9   4   2   23.50    4.40
   9   4   2   11.30    3.80
   9   4   2   12.90    3.00
 -10  -4  -2    2.70    1.50
 -10  -4  -2   -0.40    4.10
  10   4   2    8.20    2.90
  10   4   2   12.40    3.60
  10   4   2    0.60    3.40
  10   4   2    5.30    2.70
  10   4   2   -1.20    5.60
  10   4   2    4.00    3.60
  13  -5  -2   -3.40    4.90
  13  -5  -2   -2.00    4.00
  13  -5  -2   20.00    5.70
  13  -5  -2   15.20    4.00
 -13   5   2   -2.40    3.70
  12  -5  -2    7.90    1.30
  12  -5  -2   12.30    5.10
  12  -5  -2   13.90    5.20
  12  -5  -2   11.00    1.30
  12  -5  -2    7.20    3.30
  12  -5  -2   20.20    4.60
  12  -5  -2   20.90    5.30
 -12   5   2    9.20    4.40
  11  -5  -2    3.80    4.30
  11  -5  -2   12.70    4.90
  11  -5  -2    7.00    5.00
  11  -5  -2    6.40    1.40
  11  -5  -2    7.20    3.90
  11  -5  -2    9.50    3.30
  11  -5  -2    3.60    1.50
 -11   5   2    1.20    3.70
  10  -5  -2    9.20    1.80
  10  -5  -2    8.40    4.30
  10  -5  -2    4.90    4.30
  10  -5  -2    6.50    3.20
  10  -5  -2    7.30    4.00
  10  -5  -2   10.10    1.60
 -10   5   2    7.50    4.70
   9  -5  -2    7.80    4.20
   9  -5  -2    6.90    4.00
   9  -5  -2    5.10    1.60
   9  -5  -2    9.90    1.80
   9  -5  -2    3.40    2.80
  -9   5   2    2.80    3.60
   8  -5  -2   29.20    4.50
   8  -5  -2   32.30    3.50
   8  -5  -2   25.50    2.20
   8  -5  -2   24.90    2.60
   8  -5  -2   30.40    5.10
  -8   5   2   26.70    4.20
   7  -5  -2   75.89    6.30
   7  -5  -2   74.59    3.20
   7  -5  -2   70.99    6.20
   7  -5  -2   72.79    4.30
  -7   5   2   76.79    4.60
  -7   5   2   68.99    5.50
  -7   5   2   71.89    2.10
   6  -5  -2   31.50    4.90
   6  -5  -2   25.20    4.10
   6  -5  -2   28.10    2.50
   6  -5  -2   25.50    2.70
   6  -5  -2   33.50    2.50
  -6   5   2   23.10    3.20
  -6   5   2   30.20    3.30
  -6   5   2   26.20    2.00
  -6   5   2   38.50    5.40
  -6   5   2   25.90    2.00
  -6   5   2   31.80    2.90
   5  -5  -2   19.00    1.90
   5  -5  -2   17.40    2.10
   5  -5  -2   20.60    4.10
   5  -5  -2   18.70    3.00
   5  -5  -2   19.10    1.90
  -5   5   2   22.90    3.20
  -5   5   2   19.00    3.20
  -5   5   2   19.50    2.00
  -5   5   2   17.40    1.70
  -5   5   2   16.10    3.10
  -5   5   2   16.90    2.10
  -5   5   2   24.10    4.50
   4  -5  -2  157.98    4.80
   4  -5  -2  155.58    4.80
   4  -5  -2  156.98    6.70
   4  -5  -2  148.69    4.80
   4  -5  -2  151.68    7.30
  -4   5   2  158.68    5.80
  -4   5   2  153.28    6.20
  -4   5   2  157.28    4.80
  -4   5   2  152.68    7.30
  -4   5   2  158.28    4.70
  -4   5   2  161.18    4.70
   3  -5  -2  443.16   12.30
   3  -5  -2  428.06   10.50
   3  -5  -2  444.76   13.20
   3  -5  -2  440.46   10.60
   3  -5  -2  437.26   10.20
  -3   5   2  434.06   10.50
  -3   5   2  440.56   10.50
  -3   5   2  438.26   12.20
  -3   5   2  448.86   13.20
   2  -5  -2   18.40    2.20
   2  -5  -2   13.70    1.50
   2  -5  -2   15.40    3.80
   2  -5  -2   17.00    2.20
   2  -5  -2   15.10    2.60
  -2   5   2   17.40    2.20
  -2   5   2   15.90    1.60
  -2   5   2   17.40    2.10
  -2   5   2   16.90    3.70
  -2   5   2   13.10    1.90
  -2   5   2   16.10    2.70
   1  -5  -2    0.90    1.20
   1  -5  -2   -0.30    1.80
   1  -5  -2    1.00    1.80
   1  -5  -2    3.10    2.40
   1  -5  -2    0.30    3.10
   1  -5  -2    0.80    1.80
  -1   5   2    0.90    2.10
  -1   5   2    0.70    1.30
  -1   5   2    3.60    1.30
  -1   5   2    1.70    1.50
  -1   5   2    0.90    2.30
  -1   5   2    1.90    1.40
   0  -5  -2   71.39    3.70
   0  -5  -2   70.49    3.20
   0  -5  -2   75.69    3.30
   0  -5  -2   69.89    4.10
   0  -5  -2   71.19    5.20
   0  -5  -2   71.59    4.60
   0   5   2   67.69    4.50
   0   5   2   77.39    5.80
   0   5   2   69.79    3.30
   0   5   2   69.79    3.30
   0   5   2   63.59    5.00
  -1  -5  -2  302.47   10.40
  -1  -5  -2  307.47    9.20
  -1  -5  -2  298.27    8.00
  -1  -5  -2  297.57    9.80
  -1  -5  -2  301.07    8.30
  -1  -5  -2  293.77    8.30
   1   5   2  302.07    8.40
   1   5   2  304.17   10.30
   1   5   2  295.77    9.50
   1   5   2  294.97    8.00
   1   5   2  310.57    8.40
  -2  -5  -2  112.69    4.50
  -2  -5  -2  114.59    6.00
  -2  -5  -2  124.69    6.80
  -2  -5  -2  121.49    4.90
  -2  -5  -2  112.69    6.70
  -2  -5  -2  112.29    4.60
   2   5   2  123.69    6.40
   2   5   2  121.39    4.90
   2   5   2  119.79    5.00
   2   5   2  111.99    6.50
   2   5   2  122.19    5.00
  -3  -5  -2    7.30    2.40
  -3  -5  -2    6.20    4.20
  -3  -5  -2    3.40    3.30
  -3  -5  -2    3.90    3.50
  -3  -5  -2    6.30    2.30
   3   5   2   10.20    3.40
   3   5   2    9.10    2.30
   3   5   2    8.30    3.90
   3   5   2   10.40    2.60
   3   5   2   10.20    2.10
  -4  -5  -2   82.59    4.50
  -4  -5  -2   83.19    4.30
  -4  -5  -2   78.59    6.90
  -4  -5  -2   77.99    6.60
  -4  -5  -2   69.89    6.20
   4   5   2   80.89    4.60
   4   5   2   78.59    4.70
   4   5   2   79.19    4.60
   4   5   2   79.69    6.20
   4   5   2   76.69    5.60
  -5  -5  -2   45.00    3.70
  -5  -5  -2   35.90    5.10
  -5  -5  -2   45.10    6.20
  -5  -5  -2   49.50    6.20
  -5  -5  -2   32.80    3.50
   5   5   2   48.90    4.10
   5   5   2   36.60    5.50
   5   5   2   45.50    6.20
   5   5   2   47.30    4.00
   5   5   2   44.40    4.40
  -6  -5  -2   62.59    6.40
  -6  -5  -2   66.69    7.00
  -6  -5  -2   66.09    4.10
  -6  -5  -2   61.59    4.10
  -6  -5  -2   68.59    7.30
   6   5   2   54.49    5.70
   6   5   2   61.69    4.40
   6   5   2   72.69    4.60
   6   5   2   67.99    6.70
   6   5   2   71.39    4.50
  -7  -5  -2   38.20    4.00
  -7  -5  -2   45.00    6.70
  -7  -5  -2   31.60    3.20
  -7  -5  -2   42.20    6.20
   7   5   2   41.90    4.00
   7   5   2   34.60    4.00
   7   5   2   37.00    5.20
   7   5   2   31.50    5.70
   7   5   2   39.10    3.90
  -8  -5  -2   13.00    2.70
  -8  -5  -2   11.00    2.50
  -8  -5  -2   16.40    5.30
  -8  -5  -2   11.30    4.30
  -8  -5  -2   15.80    5.10
   8   5   2   15.90    3.30
   8   5   2   17.60    4.50
   8   5   2   13.00    3.60
   8   5   2   15.80    3.00
   8   5   2   10.70    5.20
  -9  -5  -2   11.00    4.40
  -9  -5  -2   16.40    5.00
  -9  -5  -2    6.10    2.20
  -9  -5  -2    5.10    2.50
   9   5   2   11.60    4.00
   9   5   2   12.40    3.70
   9   5   2    4.60    5.10
  13  -6  -2    6.90    5.10
  13  -6  -2   14.10    4.60
  13  -6  -2   -0.90    4.20
  13  -6  -2    6.00    3.40
 -13   6   2   -2.20    4.30
  12  -6  -2    5.40    3.20
  12  -6  -2   10.50    4.80
  12  -6  -2    0.10    1.50
  12  -6  -2    5.90    3.70
  12  -6  -2    2.50    4.90
  12  -6  -2    4.80    4.50
 -12   6   2   -0.20    3.70
  11  -6  -2    4.30    1.70
  11  -6  -2    4.70    3.80
  11  -6  -2    1.20    1.40
  11  -6  -2    0.00    4.30
  11  -6  -2    6.50    4.30
  11  -6  -2    3.40    2.90
 -11   6   2   -0.20    3.30
  10  -6  -2    3.50    3.50
  10  -6  -2   12.50    4.40
  10  -6  -2    7.10    1.80
  10  -6  -2    6.70    1.90
  10  -6  -2    3.60    4.90
 -10   6   2    2.30    3.80
   9  -6  -2    0.00    2.60
   9  -6  -2    5.50    4.10
   9  -6  -2    2.20    1.60
   9  -6  -2    1.10    3.80
  -9   6   2    3.80    3.60
   8  -6  -2    7.10    2.70
   8  -6  -2    6.90    3.90
   8  -6  -2    7.90    4.40
   8  -6  -2    6.10    2.00
   8  -6  -2    7.40    2.00
  -8   6   2    7.00    0.70
  -8   6   2    6.50    3.70
   7  -6  -2   74.69    6.50
   7  -6  -2   78.89    6.60
   7  -6  -2   75.19    4.40
   7  -6  -2   85.39    3.80
   7  -6  -2   80.09    4.50
  -7   6   2   79.89    3.20
  -7   6   2   76.79    3.00
  -7   6   2   84.29    6.90
  -7   6   2   79.59    4.90
  -7   6   2   81.39    4.30
  -7   6   2   77.29    5.60
   6  -6  -2   39.50    3.60
   6  -6  -2   40.40    3.20
   6  -6  -2   48.10    5.50
   6  -6  -2   42.80    5.90
   6  -6  -2   45.20    3.20
  -6   6   2   46.60    3.50
  -6   6   2   45.40    4.70
  -6   6   2   58.49    4.80
  -6   6   2   42.20    3.20
  -6   6   2   42.70    5.70
  -6   6   2   41.50    2.70
   5  -6  -2  130.29    6.90
   5  -6  -2  135.89    4.90
   5  -6  -2  133.59    7.60
   5  -6  -2  137.19    4.70
   5  -6  -2  131.29    4.70
  -5   6   2  135.69    4.60
  -5   6   2  141.29    4.50
  -5   6   2  134.99    7.70
  -5   6   2  135.99    6.00
  -5   6   2  129.69    6.90
  -5   6   2  131.69    4.70
   4  -6  -2  865.21   22.90
   4  -6  -2  857.71   21.50
   4  -6  -2  843.12   19.30
   4  -6  -2  867.41   19.40
   4  -6  -2  873.91   19.10
  -4   6   2  850.81   19.20
  -4   6   2  899.71   23.00
  -4   6   2  828.62   21.20
  -4   6   2  854.51   19.20
  -4   6   2  859.11   20.30
  -4   6   2  850.81   19.90
   3  -6  -2    7.20    2.00
   3  -6  -2    7.00    2.00
   3  -6  -2    8.80    2.80
   3  -6  -2    2.30    3.70
   3  -6  -2    6.70    1.50
  -3   6   2    7.70    1.70
  -3   6   2    6.50    3.00
  -3   6   2    8.00    2.40
  -3   6   2   11.60    2.40
  -3   6   2    6.80    1.90
  -3   6   2    4.90    1.90
   2  -6  -2  169.78    5.50
   2  -6  -2  165.98    5.10
   2  -6  -2  193.38    6.00
   2  -6  -2  170.88    7.10
   2  -6  -2  170.68    8.20
  -2   6   2  178.08    5.90
  -2   6   2  171.48    6.60
  -2   6   2  178.68    8.10
  -2   6   2  170.28    7.00
  -2   6   2  190.18    5.90
  -2   6   2  183.38    5.90
   1  -6  -2   61.49    3.00
   1  -6  -2   65.69    5.60
   1  -6  -2   65.19    4.80
   1  -6  -2   64.79    4.20
   1  -6  -2   62.09    4.00
  -1   6   2   60.49    4.50
  -1   6   2   61.09    3.80
  -1   6   2   62.99    5.40
  -1   6   2   59.49    3.30
  -1   6   2   64.19    3.10
   0  -6  -2    4.70    2.20
   0  -6  -2    4.30    2.30
   0  -6  -2    5.00    3.70
   0  -6  -2    9.20    3.00
   0  -6  -2    4.00    1.70
   0   6   2    5.20    2.80
   0   6   2    5.50    1.80
   0   6   2    2.90    2.80
   0   6   2    1.00    3.80
   0   6   2    3.80    1.70
  -1  -6  -2   22.70    2.70
  -1  -6  -2   21.60    3.50
  -1  -6  -2   23.30    4.10
  -1  -6  -2   19.90    2.90
  -1  -6  -2   25.70    3.00
  -1  -6  -2   31.40    5.20
   1   6   2   22.00    3.80
   1   6   2   22.30    2.60
   1   6   2   30.20    5.00
   1   6   2   25.70    2.70
   1   6   2   22.50    2.60
  -2  -6  -2   17.30    3.60
  -2  -6  -2   19.60    2.80
  -2  -6  -2   23.50    3.10
  -2  -6  -2   20.90    1.60
  -2  -6  -2   21.00    3.10
  -2  -6  -2   30.30    5.20
  -2  -6  -2   29.40    4.40
   2   6   2   23.70    3.20
   2   6   2   23.50    3.90
   2   6   2   21.00    2.60
   2   6   2   22.00    2.80
   2   6   2   23.70    4.70
  -3  -6  -2    5.60    2.60
  -3  -6  -2   -0.30    3.10
  -3  -6  -2    3.10    4.40
  -3  -6  -2    5.00    2.50
  -3  -6  -2    1.20    4.00
   3   6   2    1.50    3.50
   3   6   2    1.00    2.40
   3   6   2    1.00    2.50
   3   6   2    3.40    2.50
   3   6   2    0.30    3.80
  -4  -6  -2   -2.00    2.30
  -4  -6  -2   -1.70    4.40
  -4  -6  -2   -3.50    3.40
  -4  -6  -2   -0.40    3.60
   4   6   2    1.00    2.70
   4   6   2   -0.10    3.50
   4   6   2    1.40    4.00
   4   6   2    6.10    2.70
   4   6   2    3.80    2.60
  -5  -6  -2   20.50    4.40
  -5  -6  -2   28.40    3.30
  -5  -6  -2   20.90    3.10
  -5  -6  -2   19.40    9.00
  -5  -6  -2   25.20    6.00
   5   6   2   30.80    5.40
   5   6   2   24.20    3.40
   5   6   2   24.60    3.40
   5   6   2   26.40    5.10
   5   6   2   27.90    3.90
  -6  -6  -2   17.50    5.40
  -6  -6  -2   23.30    4.80
  -6  -6  -2   26.80    6.20
  -6  -6  -2   22.30    3.40
  -6  -6  -2   25.10    3.40
   6   6   2   28.20    5.40
   6   6   2   26.00    5.20
   6   6   2   23.50    3.30
   6   6   2   27.10    3.50
   6   6   2   24.20    3.80
  -7  -6  -2    4.00    4.90
  -7  -6  -2    9.10    2.60
  -7  -6  -2    5.80    2.60
  -7  -6  -2    3.50    4.40
  -7  -6  -2    9.60    4.30
   7   6   2    7.90    3.40
   7   6   2    1.00    2.60
   7   6   2    4.00    4.40
   7   6   2    7.40    3.10
   7   6   2    2.90    3.80
  -8  -6  -2    1.00    4.40
  -8  -6  -2    3.90    2.50
  -8  -6  -2    9.80    4.70
  -8  -6  -2    3.10    4.00
   8   6   2    0.80    2.70
   8   6   2    3.40    2.50
   8   6   2    5.80    3.30
   8   6   2   -3.70    4.30
   8   6   2    4.80    4.80
  -9  -6  -2    8.30    4.60
  -9  -6  -2    4.70    2.40
  -9  -6  -2   21.50    5.90
  -9  -6  -2   17.10    5.30
  -9  -6  -2    6.50    2.70
   9   6   2   10.30    3.80
   9   6   2   -6.90    7.30
   9   6   2   13.10    3.20
   9   6   2   18.70    4.60
   9   6   2    3.60    4.60
  13  -7  -2    3.10    4.40
  13  -7  -2   -0.80    1.60
  13  -7  -2   -1.00    2.90
  13  -7  -2    2.40    4.60
  13  -7  -2   12.50    4.50
 -13   7   2    0.60    4.20
  12  -7  -2   -3.10    1.70
  12  -7  -2    7.50    5.20
  12  -7  -2   -6.90    2.70
  12  -7  -2    8.20    4.60
  12  -7  -2    6.60    4.80
 -12   7   2   -5.70    3.60
  11  -7  -2   -0.80    1.70
  11  -7  -2    2.80    2.80
  11  -7  -2    0.90    3.70
  11  -7  -2    3.20    4.30
  11  -7  -2   -1.60    1.70
 -11   7   2   -6.50    3.10
  10  -7  -2    0.40    4.30
  10  -7  -2   -1.90    4.10
  10  -7  -2   -0.30    1.80
  10  -7  -2   -2.10    3.80
  10  -7  -2   -3.60    1.70
 -10   7   2   -7.20    3.20
   9  -7  -2    6.20    2.00
   9  -7  -2    1.10    2.70
   9  -7  -2    3.80    4.10
   9  -7  -2    0.80    1.90
   9  -7  -2    4.50    3.90
  -9   7   2    1.30    3.70
   8  -7  -2    5.60    6.70
   8  -7  -2   -0.50    4.10
   8  -7  -2    2.20    2.50
   8  -7  -2    4.40    2.10
  -8   7   2    2.30    3.30
  -8   7   2    2.90    1.40
  -8   7   2    7.40    4.70
  -8   7   2    0.80    1.50
  -8   7   2    1.80    2.30
   7  -7  -2   12.30    2.30
   7  -7  -2   11.80    4.00
   7  -7  -2    8.20    2.60
   7  -7  -2    9.20    2.30
   7  -7  -2   12.80    4.90
  -7   7   2    5.50    3.40
  -7   7   2    9.10    2.00
  -7   7   2   12.90    2.60
  -7   7   2   11.50    4.60
  -7   7   2   11.20    1.90
   6  -7  -2   51.29    3.80
   6  -7  -2   44.60    3.30
   6  -7  -2   48.00    6.00
   6  -7  -2   40.50    3.40
   6  -7  -2   41.90    5.70
  -6   7   2   43.90    3.20
  -6   7   2   55.29    5.60
  -6   7   2   47.00    6.00
  -6   7   2   49.60    3.60
  -6   7   2   49.60    3.00
   5  -7  -2  146.69    5.40
   5  -7  -2  133.69    7.30
   5  -7  -2  135.39    5.20
   5  -7  -2  132.99    8.30
   5  -7  -2  140.39    5.20
  -5   7   2  142.39    5.00
  -5   7   2  131.49    4.90
  -5   7   2  134.59    6.70
  -5   7   2  142.69    5.20
  -5   7   2  142.69    8.40
   4  -7  -2  188.18    9.50
   4  -7  -2  188.48    6.30
   4  -7  -2  197.08    6.20
   4  -7  -2  196.88    8.50
   4  -7  -2  198.28    6.00
  -4   7   2  197.38    6.00
  -4   7   2  202.68    6.30
  -4   7   2  181.38    8.20
  -4   7   2  202.88    9.40
   3  -7  -2  161.38    7.50
   3  -7  -2  156.98    5.10
   3  -7  -2  153.28    5.70
   3  -7  -2  147.39    7.80
   3  -7  -2  160.68    5.50
  -3   7   2  164.68    5.80
  -3   7   2  153.18    7.80
  -3   7   2  160.18    5.20
  -3   7   2  162.18    5.80
  -3   7   2  152.28    7.20
   2  -7  -2   27.60    2.70
   2  -7  -2   27.80    3.00
   2  -7  -2   24.50    2.40
   2  -7  -2   27.90    5.30
   2  -7  -2   23.90    3.90
  -2   7   2   19.10    2.90
  -2   7   2   27.90    3.10
  -2   7   2   24.40    2.50
  -2   7   2   26.70    4.50
  -2   7   2   26.80    3.90
   1  -7  -2   47.50    6.00
   1  -7  -2   44.30    4.20
   1  -7  -2   44.70    4.50
   1  -7  -2   47.80    3.30
   1  -7  -2   47.50    4.00
   1  -7  -2   50.89    3.30
  -1   7   2   47.20    3.30
  -1   7   2   48.20    3.30
  -1   7   2   48.10    5.00
  -1   7   2   44.80    3.90
  -1   7   2   42.50    5.70
   0  -7  -2   53.79    4.70
   0  -7  -2   55.49    3.70
   0  -7  -2   54.49    4.20
   0  -7  -2   62.69    3.70
   0  -7  -2   53.69    6.00
   0  -7  -2   52.19    5.30
   0   7   2   55.89    5.40
   0   7   2   54.39    3.70
   0   7   2   58.29    3.50
   0   7   2   55.39    3.70
   0   7   2   55.59    6.10
  -1  -7  -2   47.60    4.30
  -1  -7  -2   44.20    5.20
  -1  -7  -2   44.60    3.50
  -1  -7  -2   52.59    5.90
  -1  -7  -2   37.20    3.60
  -1  -7  -2   55.59    6.40
   1   7   2   39.90    5.80
   1   7   2   51.49    4.40
   1   7   2   45.30    3.90
   1   7   2   47.10    4.30
   1   7   2   44.20    5.30
  -2  -7  -2   33.50    3.40
  -2  -7  -2   38.20    4.70
  -2  -7  -2   34.60    5.30
  -2  -7  -2   40.50    3.90
  -2  -7  -2   31.50    2.00
  -2  -7  -2   44.50    6.80
  -2  -7  -2   35.70    3.40
   2   7   2   37.10    4.60
   2   7   2   43.90    3.90
   2   7   2   37.90    3.50
   2   7   2   38.90    6.20
   2   7   2   46.60    5.60
  -3  -7  -2   -2.20    4.00
  -3  -7  -2    0.50    3.60
  -3  -7  -2   -1.20    4.60
  -3  -7  -2    0.70    2.70
  -3  -7  -2    0.60    2.60
   3   7   2   -2.00    4.20
   3   7   2   -1.60    2.80
   3   7   2    1.00    2.60
   3   7   2    2.10    2.10
   3   7   2    1.80    3.50
  -4  -7  -2   42.60    7.40
  -4  -7  -2   47.40    7.20
  -4  -7  -2   43.70    4.20
  -4  -7  -2   33.50    5.20
   4   7   2   38.80    6.10
   4   7   2   35.60    5.30
   4   7   2   35.40    3.80
   4   7   2   35.90    4.00
   4   7   2   36.10    4.00
  -5  -7  -2   -3.50    3.40
  -5  -7  -2    2.40    2.50
  -5  -7  -2    1.50    4.40
  -5  -7  -2   -7.20    4.50
  -5  -7  -2    2.80    2.60
   5   7   2    0.80    4.00
   5   7   2    3.00    2.70
   5   7   2    2.10    2.80
   5   7   2   -0.40    2.70
   5   7   2    3.00    3.80
  -6  -7  -2    5.00    5.20
  -6  -7  -2    6.70    4.60
  -6  -7  -2    3.50    2.40
  -6  -7  -2    5.30    2.90
  -6  -7  -2   -5.60    3.50
   6   7   2    3.30    4.30
   6   7   2    2.40    3.10
   6   7   2    5.40    2.80
   6   7   2   -0.90    2.60
  -7  -7  -2    6.20    4.60
  -7  -7  -2    3.10    2.60
  -7  -7  -2    9.10    7.00
  -7  -7  -2    4.40    2.80
  -7  -7  -2   -2.40    3.70
   7   7   2    0.60    3.10
   7   7   2    3.80    2.70
   7   7   2   -1.90    4.40
   7   7   2    5.00    2.90
   7   7   2    4.70    4.20
  -8  -7  -2    4.30    2.60
  -8  -7  -2    3.30    2.70
  -8  -7  -2    8.60    5.50
  -8  -7  -2   -2.70    3.80
  -8  -7  -2    5.10    4.60
   8   7   2    9.20    3.80
   8   7   2   -4.50    3.30
   8   7   2   -4.40    4.90
   8   7   2    0.40    2.60
   8   7   2    3.30    2.80
  12  -8  -2    8.10    4.10
  12  -8  -2    0.30    1.90
  12  -8  -2    1.50    2.10
  12  -8  -2    1.10    5.70
  12  -8  -2   -4.80    2.70
 -12   8   2   -5.50    4.10
  11  -8  -2    1.10    1.90
  11  -8  -2   -0.40    4.30
  11  -8  -2    4.40    7.00
  11  -8  -2    2.70    2.90
  11  -8  -2   -3.10    1.80
 -11   8   2   -3.40    3.70
  10  -8  -2   -0.50    3.20
  10  -8  -2   -2.70    1.90
  10  -8  -2   -2.00    2.00
  10  -8  -2    5.60    4.30
  10  -8  -2   -1.60    4.10
 -10   8   2   -2.00    3.30
   9  -8  -2   -2.20    1.90
   9  -8  -2   -4.50    2.30
   9  -8  -2    2.70    4.40
   9  -8  -2    0.80    2.00
   9  -8  -2    0.20    4.20
  -9   8   2   -0.10    2.70
  -9   8   2   -1.70    1.20
  -9   8   2   -0.30    4.20
  -9   8   2   -2.10    1.20
   8  -8  -2    0.90    3.50
   8  -8  -2   -2.50    2.30
   8  -8  -2   -2.50    2.00
   8  -8  -2   -0.80    4.20
  -8   8   2   -3.10    1.60
  -8   8   2   -5.00    3.90
  -8   8   2   -3.90    2.20
  -8   8   2   -3.00    1.50
   7  -8  -2    2.30    4.80
   7  -8  -2    0.20    2.20
   7  -8  -2    0.90    2.00
   7  -8  -2   -5.60    4.10
   7  -8  -2   -3.40    2.30
  -7   8   2    1.00    2.60
  -7   8   2   -4.90    4.10
  -7   8   2    1.60    2.00
  -7   8   2    0.70    2.20
   6  -8  -2    0.70    2.10
   6  -8  -2    1.10    3.00
   6  -8  -2   -1.50    4.50
   6  -8  -2   -3.50    2.10
   6  -8  -2    2.00    2.20
  -6   8   2    2.90    2.00
  -6   8   2    2.40    3.90
  -6   8   2   -2.00    4.50
  -6   8   2    3.60    2.20
  -6   8   2    1.20    1.90
   5  -8  -2    4.60    3.70
   5  -8  -2    2.30    1.70
   5  -8  -2    0.70    2.30
   5  -8  -2   -2.20    4.00
   5  -8  -2    0.70    1.80
  -5   8   2    1.70    2.10
  -5   8   2    1.80    2.10
  -5   8   2    1.70    1.90
  -5   8   2   -1.70    3.50
  -5   8   2    0.20    4.10
   4  -8  -2    7.30    2.60
   4  -8  -2    8.50    4.00
   4  -8  -2    4.80    2.60
   4  -8  -2   10.20    2.10
   4  -8  -2    9.60    3.70
  -4   8   2    6.90    2.50
  -4   8   2   11.00    2.20
  -4   8   2    9.30    2.00
  -4   8   2   13.60    3.80
  -4   8   2    9.00    4.40
   3  -8  -2   90.79    4.20
   3  -8  -2   81.79    7.40
   3  -8  -2   72.59    4.10
   3  -8  -2   83.89    4.20
   3  -8  -2   95.09    6.40
  -3   8   2   83.39    4.20
  -3   8   2   87.79    4.00
  -3   8   2   94.59    4.90
  -3   8   2   93.69    7.30
  -3   8   2   76.29    5.30
   2  -8  -2   21.10    3.80
   2  -8  -2   23.00    2.80
   2  -8  -2   23.50    2.60
   2  -8  -2   26.10    2.90
   2  -8  -2   22.10    3.70
   2  -8  -2   23.70    5.80
  -2   8   2   23.60    4.80
  -2   8   2   23.70    2.80
  -2   8   2   19.60    3.20
  -2   8   2   21.10    2.50
  -2   8   2   22.40    3.70
   1  -8  -2  119.69    7.20
   1  -8  -2  124.59    5.80
   1  -8  -2  118.19    5.20
   1  -8  -2  118.99    8.40
   1  -8  -2  115.69    6.30
   1  -8  -2  124.59    5.10
  -1   8   2  120.99    7.00
  -1   8   2  125.79    5.80
  -1   8   2  124.19    5.00
  -1   8   2  113.49    5.30
  -1   8   2  104.59    7.80
   0  -8  -2   60.19    4.80
   0  -8  -2   53.19    3.90
   0  -8  -2   51.89    5.30
   0  -8  -2   56.39    6.90
   0  -8  -2   53.79    6.00
   0  -8  -2   60.39    4.70
   0   8   2   56.89    5.50
   0   8   2   50.89    6.20
   0   8   2   54.29    4.70
   0   8   2   57.59    3.90
   0   8   2   55.19    4.70
  -1  -8  -2   22.50    3.60
  -1  -8  -2   17.20    4.00
  -1  -8  -2   21.10    3.50
  -1  -8  -2   26.90    6.20
  -1  -8  -2   18.80    2.90
  -1  -8  -2   19.10    4.50
   1   8   2   23.30    3.70
   1   8   2   18.70    4.10
   1   8   2   14.50    5.40
   1   8   2   16.10    2.80
   1   8   2   19.20    3.50
  -2  -8  -2   16.80    3.40
  -2  -8  -2   17.00    1.90
  -2  -8  -2   20.30    3.00
  -2  -8  -2   23.00    5.00
  -2  -8  -2   22.80    4.40
  -2  -8  -2   20.70    6.20
  -2  -8  -2   18.10    3.00
   2   8   2   14.20    2.80
   2   8   2   18.70    5.60
   2   8   2   19.60    3.10
   2   8   2   22.10    4.60
   2   8   2   11.80    3.30
  -3  -8  -2   53.59    7.40
  -3  -8  -2   58.09    4.70
  -3  -8  -2   51.39   10.80
  -3  -8  -2   54.69    5.40
  -3  -8  -2   48.60    6.00
   3   8   2   61.99    6.50
   3   8   2   75.89    7.10
   3   8   2   54.79    4.70
   3   8   2   53.69    4.90
  -4  -8  -2   13.70    3.10
  -4  -8  -2   16.70    4.50
  -4  -8  -2   11.00    4.70
  -4  -8  -2   11.10    6.00
  -4  -8  -2   14.20    3.20
   4   8   2   13.60    2.80
   4   8   2   15.60    7.60
   4   8   2   12.40    3.20
   4   8   2   15.20    4.50
  -5  -8  -2    8.70    3.20
  -5  -8  -2    7.90    2.90
  -5  -8  -2   13.90    5.00
  -5  -8  -2   13.00    9.10
  -5  -8  -2   10.40    5.10
   5   8   2    8.50    4.60
   5   8   2   15.90    3.50
   5   8   2   15.20    3.50
   5   8   2   14.80    4.90
   5   8   2   12.80    3.50
  -6  -8  -2    1.20    3.80
  -6  -8  -2    2.70    5.40
  -6  -8  -2   -1.80    2.40
  -6  -8  -2    2.90    2.70
  -6  -8  -2    4.60    4.40
   6   8   2    1.10    2.90
   6   8   2   -5.00    4.10
   6   8   2    0.20    3.00
   6   8   2    4.80    4.20
   6   8   2    7.20    3.30
  -7  -8  -2   -2.10    2.20
  -7  -8  -2   -0.10    4.00
  -7  -8  -2    8.10    5.80
  -7  -8  -2    2.70    2.60
   7   8   2   -4.40    4.40
   7   8   2    0.30    3.00
   7   8   2    6.30    4.10
   7   8   2    0.50    3.90
   7   8   2    2.30    3.00
  12  -9  -2    4.30    5.00
  12  -9  -2    0.10    3.00
  12  -9  -2    2.10    2.30
  12  -9  -2    2.90    2.20
 -12   9   2    0.50    3.80
  11  -9  -2   -0.90    2.80
  11  -9  -2   -3.00    3.60
  11  -9  -2    2.90    4.20
  11  -9  -2   -0.90    2.20
  11  -9  -2   -0.40    2.10
 -11   9   2    3.80    4.40
  10  -9  -2   -4.50    4.20
  10  -9  -2   -2.40    2.60
  10  -9  -2    4.30    4.40
  10  -9  -2    2.70    2.20
  10  -9  -2   -3.40    2.00
 -10   9   2   -2.80    2.60
 -10   9   2   -0.30    1.00
   9  -9  -2    5.30    4.30
   9  -9  -2    1.30    4.40
   9  -9  -2    5.80    2.50
   9  -9  -2    1.10    2.60
   9  -9  -2    0.80    3.90
  -9   9   2    3.60    4.70
  -9   9   2    0.30    1.60
  -9   9   2    0.20    1.70
  -9   9   2    2.70    2.40
   8  -9  -2    3.10    2.30
   8  -9  -2   -0.70    2.40
   8  -9  -2    1.40    4.40
   8  -9  -2    3.30    2.50
   8  -9  -2    3.20    4.30
  -8   9   2   -0.50    1.80
  -8   9   2    1.60    2.30
  -8   9   2    4.60    2.00
   7  -9  -2    0.50    2.20
   7  -9  -2    4.80    3.60
   7  -9  -2   -0.20    2.30
   7  -9  -2   -1.00    4.50
  -7   9   2    0.30    1.90
  -7   9   2    0.00    4.20
  -7   9   2   -0.40    2.10
   6  -9  -2   83.79    4.60
   6  -9  -2   59.89    9.80
   6  -9  -2   75.29    4.70
   6  -9  -2   76.49    4.60
   6  -9  -2   76.69    7.50
  -6   9   2   79.39    7.40
  -6   9   2   72.09    6.70
  -6   9   2   86.19    4.60
  -6   9   2   69.89    4.20
   5  -9  -2   13.70    2.90
   5  -9  -2    9.70    2.30
   5  -9  -2    6.70    3.90
   5  -9  -2    6.50    5.40
   5  -9  -2    9.70    2.90
  -5   9   2    9.80    2.40
  -5   9   2   11.00    5.10
  -5   9   2   15.40    2.80
  -5   9   2    4.50    3.60
   4  -9  -2   63.09    4.00
   4  -9  -2   66.89    7.50
   4  -9  -2   69.59    3.90
   4  -9  -2   75.09    5.00
   4  -9  -2   65.19    6.50
  -4   9   2   70.99    4.60
  -4   9   2   68.19    4.00
  -4   9   2   64.69    6.20
  -4   9   2   63.09    7.10
  -4   9   2   67.29    4.00
   3  -9  -2   10.00    2.80
   3  -9  -2    6.70    2.20
   3  -9  -2    9.70    5.20
   3  -9  -2    8.50    2.30
   3  -9  -2    7.50    3.80
  -3   9   2    6.20    3.40
  -3   9   2    6.00    2.20
  -3   9   2   14.80    3.10
  -3   9   2    1.20    4.30
  -3   9   2    9.50    3.00
   2  -9  -2   38.50    3.70
   2  -9  -2   35.00    3.50
   2  -9  -2   44.70    4.40
   2  -9  -2   40.20    7.10
   2  -9  -2   42.30    4.20
   2  -9  -2   38.40    5.40
  -2   9   2   38.80    4.10
  -2   9   2   36.40    3.60
  -2   9   2   42.60    6.20
  -2   9   2   40.70    3.40
  -2   9   2   31.80    5.00
   1  -9  -2   89.89    6.30
   1  -9  -2   85.09    4.80
   1  -9  -2   90.29    5.60
   1  -9  -2   91.79    7.10
   1  -9  -2   83.59    4.50
   1  -9  -2   87.89    7.90
  -1   9   2   93.39    5.60
  -1   9   2   88.69    5.50
  -1   9   2   91.69    4.80
  -1   9   2   83.79    7.50
  -1   9   2   83.69    6.60
   0  -9  -2   34.20    4.80
   0  -9  -2   42.30    7.40
   0  -9  -2   35.10    3.40
   0  -9  -2   35.40    3.70
   0  -9  -2   34.80    4.10
   0  -9  -2   35.80    5.40
   0   9   2   42.00    5.40
   0   9   2   31.30    3.60
   0   9   2   33.60    3.60
   0   9   2   39.50    3.60
   0   9   2   39.10    6.80
  -1  -9  -2   12.60    2.20
  -1  -9  -2   12.60    2.80
  -1  -9  -2   14.20    4.00
  -1  -9  -2   13.70    2.90
  -1  -9  -2   18.00    3.50
  -1  -9  -2   14.90    6.10
  -1  -9  -2   15.50    4.90
   1   9   2   13.50    2.80
   1   9   2   14.90    2.90
   1   9   2   13.00    2.80
   1   9   2   11.40    9.10
   1   9   2   15.90    4.40
  -2  -9  -2   21.60    2.20
  -2  -9  -2   24.50    4.70
  -2  -9  -2   24.30    4.60
  -2  -9  -2   22.00    3.50
  -2  -9  -2   26.70    3.90
  -2  -9  -2   35.20    7.00
  -2  -9  -2   27.40    5.20
   2   9   2   31.00    5.30
   2   9   2   36.50    3.90
[truncated: 2,198,562 more chars]
